# Supplementary material for: Small molecule inhibitors of fungal Δ(9) fatty acid desaturase as antifungal agents against Candida auris
Source: Front Cell Infect Microbiol. 2024 Aug 30;14:1434939. doi: 10.3389/fcimb.2024.1434939 (PMC11392922; doi:10.3389/fcimb.2024.1434939)
Supplement: Supplementary file 6 [file Table3.xlsx]

## Sheet: Table S3
Supplementary Table S3	Transcripts differentially expressed in C. albicans SC5314 and C. auris 381 strains treated with SPB00525 for 15 min and 60 min using a 1-Log2FC cut-off and a 1% false discovery rate. Raw data for each experiment are also shown.
	Description:
		C. albicans 15 min	RNA-seq raw data of C. albicans cells exposed to SPB00525 for 15min
		C. albicans 60 min	RNA-seq raw data of C. albicans cells exposed to SPB00525 for 60min
		C. auris 15 min	RNA-seq raw data of C. auris cells exposed to SPB00525 for 15min
		C. auris 60 min	RNA-seq raw data of C. auris cells exposed to SPB00525 for 60min
		Diff exp C. alb	Differentially SPB00525-regulated transcripts in C. albicans
		Diff exp C. aur	Differentially SPB00525-regulated transcripts in C. auriss

## Sheet: C. albicans 15 min
Gene	CGD ID	Gene symbol	log2FC	pvalue	pvalue
CAALFM_C403340CA	C1_00280C_A	RFC52	orf19.6079	NA	NA
CAALFM_C603840CA	C1_03580W_A		orf19.3059.2,	NA	NA
CAALFM_CR04690CA	C1_04440W_A		orf19.6833.2	NA	NA
CAALFM_C406900WA	C1_05250W_A		orf19.442	NA	NA
CAALFM_CR07260CA	C1_05450W_A		orf19.420	NA	NA
CAALFM_C113870WA	C1_05570W_A	RIB4	NA	NA	NA
CAALFM_C603170CA	C1_05730W_A		NA	NA	NA
CAALFM_C700770WA	C1_06190C_A		TLO34/orf19.2661	NA	NA
CAALFM_C504210CA	C1_09820C_A		orf19.4847	NA	NA
CAALFM_C601180CA	C2_00310W_A		orf19.2103	NA	NA
CAALFM_C201080CA	C2_03720W_A	PGA16	orf19.848	NA	NA
CAALFM_C200760CA	C2_03730W_A	PGA16	NA	NA	NA
CAALFM_C406780CA	C2_04290W_A	RIM11	orf19.791	NA	NA
CAALFM_C206460WA	C2_05310C_A		NA	NA	NA
CAALFM_CR08390WA	C2_05880W_A		NA	NA	NA
CAALFM_C206450CA	C2_06400C_A	IMH3	NA	NA	NA
CAALFM_C500430WA	C2_07870C_A		orf19.2195	NA	NA
CAALFM_C104050CA	C3_00120W_A		orf19.5464	NA	NA
CAALFM_CR07880CA	C3_00140W_A		orf19.5462	NA	NA
CAALFM_C405950CA	C3_00150W_A		orf19.5461	NA	NA
CAALFM_C504230WA	C3_00190W_A		orf19.5451	NA	NA
CAALFM_C601540CA	C3_00230C_A		orf19.5446	NA	NA
CAALFM_CR07740WA	C3_00590W_A		orf19.5402	NA	NA
CAALFM_C306380WA	C3_00680C_A		orf19.5390	NA	NA
CAALFM_C208100WA	C3_01050C_A		orf19.2509	NA	NA
CAALFM_C104010CA	C3_02740C_A		NA	NA	NA
CAALFM_C305220WA	C3_03620C_A		orf19.6957	NA	NA
CAALFM_C203750WA	C3_04850C_A		NA	NA	NA
CAALFM_C104140WA	C3_06390W_A		orf19.7398	NA	NA
CAALFM_C209990CA	C3_07520W_A	VAN1	NA	NA	NA
CAALFM_C601510WA	C3_07840C_A		orf19.6179	NA	NA
CAALFM_CR01200WA	C3_07910W_A		orf19.6187;	NA	NA
CAALFM_C205240CA	C3_07930C_A		orf19.6188	NA	NA
CAALFM_CR08220CA	C4_00250W_A		orf19.5649	NA	NA
CAALFM_C603930WA	C4_03650W_A	CDR3	NA	NA	NA
CAALFM_C205010WA	C4_04200C_A		orf19.5290	NA	NA
CAALFM_C206500WA	C4_04490C_A	EFB1	NA	NA	NA
CAALFM_C202480WA	C4_05990W_A		NA	NA	NA
CAALFM_C601410CA	C5_02130W_A		orf19.4217	NA	NA
CAALFM_C603700WA	C6_00010W_A	NRG2	orf19.6339	NA	NA
CAALFM_C704090CA	C6_03870C_A	PGA61	NA	NA	NA
CAALFM_C207280WA	C7_00500W_A		orf19.7070	NA	NA
CAALFM_C406890WA	C7_01000C_A		orf19.7015	NA	NA
CAALFM_C109890CA	C7_01260W_A	ASC1	NA	NA	NA
CAALFM_CR08340WA	CR_00720W_A		orf19.3284	NA	NA
CAALFM_C101020WA	CR_00840C_A		orf19.3271	NA	NA
CAALFM_CR06880CA	CR_03320C_A		orf19.2392	NA	NA
CAALFM_C105590WA	CR_08820C_A	TAR1	orf19.6834.10	NA	NA
CAALFM_C208090WA	CR_00530W_A		orf19.7482	5.30469	0.0122602
CAALFM_CR04700CA	C3_04040W_A		orf19.2804	4.98289	0.0295714
CAALFM_CR08210CA	CR_01850C_A	NA	orf19.2583.2	4.39812	0.111829
CAALFM_C401160WA	C2_06180C_A	FGR12	orf19.5479	3.71959	0.222446
CAALFM_C304170WA	C1_06150W_A		orf19.2430	3.66398	0.0842167
CAALFM_C110800CA	C4_06630C_A		orf19.2869	3.39822	0.421967
CAALFM_C109210CA	C5_04200W_A	MRV3	orf19.3903	3.39775	0.303808
CAALFM_C207070WA	C4_03630C_A	CDR3	NA	2.98317	0.525479
CAALFM_C403370CA	CR_05190W_A		orf19.555	2.98286	0.422619
CAALFM_CR00210WA	C2_09800C_A		orf19.1370	2.77219	0.241406
CAALFM_C103820WA	CR_07540C_A		orf19.2624	2.62877	0.146506
CAALFM_CR09100CA	CR_09180W_A	CDG1	orf19.7314	2.586	8.41e-113
CAALFM_C107880CA	C1_01970W_A		orf19.4528.1	2.55313	0.400584
CAALFM_C300920WA	C3_01740C_A		orf19.1671.1	2.55216	0.400816
CAALFM_C406970CA	C2_06980W_A		orf19.2252	2.55049	0.303915
CAALFM_C208080CA	C1_12040W_A		orf19.5262	2.53193	0.0724481
CAALFM_C402990CA	C5_01380W_A	CFL5	orf19.1930	2.46788	6.13e-07
CAALFM_C601440CA	C3_01540W_A		orf19.1691	2.42691	3.34e-142
CAALFM_C210000CA	C2_08350C_A		orf19.1348	2.41412	0.0828273
CAALFM_C701520WA	C2_03850W_A	INO4	NA	2.3982	0.623989
CAALFM_C304070CA	C3_05490C_A	TEA1	NA	2.3982	0.623989
CAALFM_C703780CA	C4_06920C_A	CSA2	orf19.3117	2.3982	0.623989
CAALFM_C107310CA	C7_02270W_A	LDG3	orf19.6486	2.3982	0.623989
CAALFM_C303000WA	C4_04740W_A	BAS1	NA	2.39773	0.580663
CAALFM_C303460CA	C5_04460C_A		orf19.3931.2	2.39723	0.624134
CAALFM_C305280CA	C7_02250W_A		orf19.6488	2.39723	0.624134
CAALFM_C201140CA	C1_07040C_A		orf19.6200	2.38208	8.23e-15
CAALFM_C701150WA	C3_05050W_A	TRY4	orf19.5975	2.37878	0.105308
CAALFM_C401340WA	CR_01840W_A	NA	orf19.2583.1	2.28785	0.375511
CAALFM_CR05860WA	C5_00540C_A	AGA1	orf19.935	2.28767	0.375556
CAALFM_CR02540WA	C1_12850W_A	BLP1	orf19.4914.1	2.27357	3.42e-30
CAALFM_C700630CA	C7_01060W_A		orf19.7007	2.25102	0.474689
CAALFM_C403010WA	C3_02750W_A		orf19.265	2.21687	0.00988594
CAALFM_C206720WA	C1_06370C_A	PBR1	orf19.6274	2.15497	0.278845
CAALFM_C306760WA	C4_03660W_A	CDR3	NA	2.12509	0.241258
CAALFM_CR05820CA	C6_02510C_A	ASG7	orf19.5520	2.08056	0.21564
CAALFM_CR05400CA	C1_00350C_A	HMX1	orf19.6073	2.07987	2.76e-53
CAALFM_C111700CA	C5_04930C_A	MAL31	orf19.3981	2.0773	6.49e-20
CAALFM_C406980WA	C3_05580C_A	GAP2	orf19.6993	2.03971	0.00387021
CAALFM_C205630CA	C2_04010C_A	HSP21	orf19.822	2.0025	0.192027
CAALFM_C405400CA	CR_07500W_A		orf19.2620	1.97361	0.125808
CAALFM_C109010WA	C2_09080C_A	FGR18	orf19.4067	1.95525	0.309333
CAALFM_C402610CA	C4_00120W_A	PGA7	orf19.5635	1.88791	2.59e-05
CAALFM_C113890CA	C4_00110C_A	FRP1	orf19.5634	1.83324	4e-35
CAALFM_C101520CA	C2_01460C_A		orf19.1450	1.82192	0.165975
CAALFM_C601870CA	C5_04390C_A		orf19.3925	1.81965	0.053893
CAALFM_C701440WA	C2_04000C_A		orf19.823	1.81155	0.205595
CAALFM_C204830WA	CR_07140C_A		orf19.11	1.79719	0.0303522
CAALFM_C502600WA	C4_01390W_A	HAP3	orf19.4647	1.7612	4.24e-11
CAALFM_C406790WA	C1_06990C_A		NA	1.75733	0.148206
CAALFM_C300970WA	CR_02490W_A	OPT4	orf19.2292	1.75107	4.19e-44
CAALFM_CR04980CA	C1_11710C_A		orf19.1148	1.74912	0.00502018
CAALFM_CR05600CA	C6_02950C_A		orf19.5573	1.72803	1.3e-09
CAALFM_CR05520WA	C1_07160C_A		orf19.4450.1	1.72474	3.27e-05
CAALFM_C206170CA	C1_08590C_A	ERG1	orf19.406	1.69105	8.08e-85
CAALFM_C103230CA	CR_08880C_A		orf19.7283	1.67265	0.0703287
CAALFM_C113730CA	CR_02280W_A	PGA23	orf19.3740	1.67076	7.91e-12
CAALFM_C103790CA	C7_01380W_A		orf19.6919	1.64602	2.03e-32
CAALFM_C202940WA	C5_03520W_A		orf19.6661	1.63112	0.0410718
CAALFM_C501150CA	C3_02680C_A	SLD1	orf19.260	1.62727	6.96e-74
CAALFM_C200040CA	C3_01640C_A		orf19.1679	1.58308	0.0320111
CAALFM_C201770CA	C1_09400C_A	FTH1	orf19.4802	1.57093	0.000292577
CAALFM_C202470CA	C3_00220W_A	HGT19	orf19.5447	1.56248	1.37e-17
CAALFM_C404680CA	C4_00130W_A	RBT5	orf19.5636	1.56146	0.000135501
CAALFM_C702260WA	C5_00990W_A	TRY3	NA	1.55236	0.60044
CAALFM_C701030CA	C4_06520W_A	CSO99	NA	1.54667	0.262696
CAALFM_C301200WA	C1_04770C_A	ERG3	orf19.767	1.54661	9.18e-23
CAALFM_C500590WA	C1_07330W_A	RME1	orf19.4438	1.53598	0.0893182
CAALFM_C502890WA	C4_00450C_A	PGA10	orf19.5674	1.53036	0.0138782
CAALFM_C202540WA	C2_00910W_A	PGA19	orf19.2033	1.52647	0.0133217
CAALFM_C302220WA	CR_05590C_A		NA	1.51737	0.607264
CAALFM_C701430CA	C7_00540W_A	PSF3	NA	1.51154	0.667219
CAALFM_C210730WA	C5_00390C_A		orf19.951	1.50879	9.66e-43
CAALFM_C303790WA	C5_04250W_A	MRV8	orf19.3908	1.49895	0.0276455
CAALFM_C604160CA	C3_01920C_A		NA	1.4818	0.153539
CAALFM_C205750WA	C1_09420W_A	LIP2	orf19.4804	1.48156	0.192583
CAALFM_C302900WA	C1_02520W_A	SCW4	orf19.2941	1.48153	0.292993
CAALFM_CR05660WA	C5_04190W_A	MRV2	orf19.3902	1.48064	2.88e-09
CAALFM_C105580WA	CR_04220C_A		orf19.510	1.47946	1.8e-19
CAALFM_C100160CA	CR_03670W_A		orf19.4366	1.47823	0.18454
CAALFM_C700570WA	C2_02850W_A	UGA6	orf19.5820	1.47043	2.46e-06
CAALFM_C210740CA	C1_02070W_A	HSP31	orf19.3664	1.46991	0.000215121
CAALFM_C111610CA	C2_07630C_A		orf19.1862	1.46507	0.0257757
CAALFM_C104040CA	C4_03500C_A		orf19.3378	1.4642	0.105398
CAALFM_C303600CA	C3_06700C_A		orf19.7459	1.46035	7.08e-26
CAALFM_C701130CA	CR_02020C_A	OPT1	orf19.2602	1.45783	3.7e-24
CAALFM_C204120CA	C6_02100W_A		orf19.3499	1.44918	0.0150757
CAALFM_C110160WA	C1_05550C_A		NA	1.44247	0.0664299
CAALFM_C114220CA	C3_03450C_A	BMT7	orf19.342	1.43388	0.00019625
CAALFM_C601070CA	CR_04210C_A	QDR1	orf19.508	1.43296	7.16e-18
CAALFM_C703850WA	C2_08150W_A		orf19.2169	1.43104	0.366276
CAALFM_CR03570CA	C4_02230C_A		orf19.4567	1.43071	0.354484
CAALFM_C600920WA	C1_14140C_A	SET3	orf19.7221	1.40989	2.49e-73
CAALFM_C306030WA	C1_10050W_A		orf19.4872	1.40564	0.0729218
CAALFM_C209140CA	C1_01730W_A		NA	1.3981	0.779658
CAALFM_C109330WA	C3_01870C_A	DBP5	NA	1.3981	0.779658
CAALFM_C207960CA	C3_03220C_A		NA	1.3981	0.779658
CAALFM_C304890WA	C2_00900W_A		orf19.2034	1.39758	0.779739
CAALFM_C301000WA	CR_00730C_A		NA	1.39758	0.779739
CAALFM_C303780WA	C4_03160C_A		orf19.2674	1.39676	1.31e-07
CAALFM_C305810CA	C1_02150W_A	GAL10	orf19.3672	1.39369	0.000553796
CAALFM_C604460WA	C6_02890C_A	HPD1	orf19.5565	1.3904	0.00344617
CAALFM_CR04170WA	C2_00250W_A	STF2	orf19.2107.1	1.38735	0.000145338
CAALFM_C206470WA	C4_02360W_A	AMS1	orf19.2768	1.38524	5.97e-05
CAALFM_C200400CA	C1_02540C_A	DIP5	NA	1.37125	3.35e-41
CAALFM_C203080WA	C1_08790W_A	TPO3	orf19.4737	1.36923	3.52e-34
CAALFM_C209320CA	C1_08460C_A	UPC2	orf19.391	1.3688	8.89e-06
CAALFM_C502710WA	C5_05200C_A		orf19.4013	1.36576	1.72e-55
CAALFM_CR03280WA	C4_06380W_A	SOU2	orf19.2897	1.35851	0.471968
CAALFM_C204080WA	C3_01130C_A		orf19.2515	1.35075	0.00701334
CAALFM_C206930CA	C7_03280C_A		orf19.5125	1.34543	9.89e-12
CAALFM_C205160CA	C4_00990W_A		orf19.4690	1.34392	0.319382
CAALFM_CR01410CA	C2_00680C_A	SOD5	orf19.2060	1.34343	4.95e-06
CAALFM_C404000WA	C4_01170C_A	BMT9	orf19.4673	1.33812	0.0027518
CAALFM_C504880CA	C4_01530C_A	ERG251	orf19.4631	1.33347	1.44e-18
CAALFM_C110360CA	CR_02220C_A	OPT3	orf19.3749	1.33194	0.00169557
CAALFM_C407020CA	CR_08270W_A		orf19.6391	1.33079	0.0689673
CAALFM_C103060CA	C6_02450W_A		orf19.5514	1.32353	1.46e-32
CAALFM_C307300WA	C1_06260W_A	PGA50	orf19.1824	1.3167	0.493523
CAALFM_C201450CA	C4_04040W_A		orf19.5306	1.31351	0.588696
CAALFM_C503810CA	C1_02580W_A	HNM4	orf19.2946	1.31125	0.000133726
CAALFM_CR04160CA	C5_04980W_A		orf19.3988	1.30731	0.0474925
CAALFM_CR01780WA	C5_04260W_A		orf19.3910	1.30623	1.3e-14
CAALFM_CR04110WA	C1_11260C_A		orf19.675.1	1.30433	0.00370891
CAALFM_C306160CA	C2_08390W_A		orf19.1433	1.29774	7.67e-58
CAALFM_C703540CA	C1_13160W_A	PSA2	orf19.4943	1.29235	9.51e-31
CAALFM_CR06120WA	C3_00600W_A	IFF11	orf19.5399	1.28835	5.96e-05
CAALFM_C208200WA	CR_01450C_A		NA	1.27695	0.541189
CAALFM_C504910WA	C1_01220C_A		orf19.3310	1.27365	4.35e-08
CAALFM_C204550CA	C1_03870C_A		orf19.4459	1.27289	9.29e-05
CAALFM_C301430WA	C5_02570W_A	MNN13	orf19.4270	1.26076	3.33e-26
CAALFM_C111100WA	CR_05170C_A	FDH1	orf19.638	1.25903	0.282653
CAALFM_C305480CA	CR_02290W_A	PGA22	orf19.3738	1.253	0.359061
CAALFM_C102450CA	C2_10690W_A	TPS3	orf19.5348	1.2467	2.57e-48
CAALFM_CR04240CA	C1_07080W_A		orf19.6196	1.24042	1.28e-13
CAALFM_C601170WA	CR_09140C_A		orf19.7310	1.23684	3.22e-10
CAALFM_C403830WA	C3_06040W_A		orf19.7385	1.23589	0.0068932
CAALFM_C400970CA	CR_05340C_A	IFE2	orf19.5288	1.23399	3.02e-49
CAALFM_C400510CA	C4_05880W_A	GAT1	orf19.1275	1.23179	5.87e-15
CAALFM_C604330WA	C5_00870C_A	GIT4	orf19.1980	1.22636	1.55e-06
CAALFM_C307640CA	C1_05540C_A		orf19.411	1.2162	1.84e-60
CAALFM_C110270CA	C2_08290C_A	UCF1	orf19.1354	1.21476	4.12e-52
CAALFM_CR00800CA	C5_04450C_A	NA	orf19.3931.1	1.21121	0.167946
CAALFM_C201210CA	CR_09170C_A	SSU1	orf19.7313	1.20798	4.77e-16
CAALFM_C403720CA	C3_03360W_A	FCY2	orf19.333	1.20356	4.69e-38
CAALFM_C107600WA	CR_09680C_A	RTA4	orf19.6595	1.20015	5.44e-08
CAALFM_C602770WA	C3_03490W_A	RSN1	orf19.347	1.19266	4.9e-25
CAALFM_C600220CA	C1_09300C_A		orf19.4789	1.18859	1.98e-06
CAALFM_C504750CA	C2_05700W_A	OSM1	orf19.6882	1.18389	1.45e-73
CAALFM_C600850WA	C1_06860W_A		orf19.6224	1.17469	0.390829
CAALFM_C304560WA	CR_02920C_A	AQY1	orf19.2849	1.1728	0.14308
CAALFM_C503350WA	CR_10840C_A	XYL2	orf19.7676	1.17004	1.91e-13
CAALFM_C406710WA	C6_03240W_A		orf19.5611	1.16958	0.0409663
CAALFM_C112310CA	CR_06650C_A		orf19.699	1.15912	5.86e-07
CAALFM_C701200CA	CR_09880W_A	DEF1	orf19.7561	1.1568	1.79e-14
CAALFM_C405010WA	C2_02860W_A	SUR2	orf19.5818	1.14628	1.1e-56
CAALFM_C602360WA	C1_06610C_A	HAK1	orf19.6249	1.14428	0.177248
CAALFM_CR10240WA	C4_02560C_A	UME7	orf19.2745	1.13915	0.00107336
CAALFM_C113670WA	C4_04620C_A		orf19.3820	1.13207	0.00810092
CAALFM_C600620WA	C3_06560W_A		orf19.7445	1.13181	2.29e-30
CAALFM_CR06720WA	C7_01390W_A		orf19.6920	1.12952	4.62e-12
CAALFM_C205090WA	CR_02810W_A	CIRT4B	orf19.2839	1.12612	2.95e-17
CAALFM_C105840WA	C3_04060C_A	HEM13	orf19.2803	1.12203	5.2e-28
CAALFM_CR08500WA	C5_01300C_A		orf19.1939	1.1172	3.51e-12
CAALFM_C200960CA	C1_03750W_A		orf19.1034	1.1123	3.4e-48
CAALFM_C110670CA	C1_04690C_A		orf19.776	1.11191	0.0240804
CAALFM_CR10550WA	CR_07150W_A	GLK1	orf19.734	1.10744	8.56e-35
CAALFM_CR09800CA	C3_01230C_A		orf19.1728	1.10435	0.00447165
CAALFM_C204570WA	C1_05690C_A		orf19.2481	1.09961	0.151304
CAALFM_C114080WA	C1_06620C_A		orf19.6248	1.09556	0.0678091
CAALFM_C301560WA	CR_02240C_A	OPT2	orf19.3746	1.09527	0.00199823
CAALFM_C302130WA	CR_08780W_A	NA	NA	1.09434	3.63e-05
CAALFM_C209660WA	C1_01990W_A	HSP30	orf19.4526	1.09366	0.0217753
CAALFM_C603790CA	C1_09190C_A	DAK2	orf19.4777	1.08908	1.55e-18
CAALFM_C404100CA	C3_07070C_A		orf19.6793	1.08741	2.67e-06
CAALFM_C305160CA	C7_02880C_A	LIP9	orf19.5172	1.08593	0.102993
CAALFM_C700160CA	C2_02140C_A		orf19.1530	1.08565	0.444827
CAALFM_C110970WA	C4_05440C_A		orf19.1800	1.07648	1.09e-14
CAALFM_C206360CA	CR_08380C_A		orf19.6405	1.07361	0.0916649
CAALFM_C109510WA	CR_02070C_A	ADH5	orf19.2608	1.07204	6.09e-27
CAALFM_C601940WA	C5_05480W_A	DES1	orf19.4048	1.05801	3.3e-57
CAALFM_C207300CA	C7_03560W_A		orf19.6688	1.05685	0.132803
CAALFM_CR06660WA	C5_01400W_A	SEF2	orf19.1926	1.05619	5.78e-08
CAALFM_CR09390CA	CR_02800C_A		orf19.2838	1.05157	1.55e-13
CAALFM_C400330CA	C1_09650W_A		orf19.4828	1.05115	7.56e-46
CAALFM_C303650WA	CR_09930W_A		orf19.7567	1.04904	4.09e-15
CAALFM_C200600CA	C1_02130C_A	GAL1	orf19.3670	1.04892	5.49e-08
CAALFM_C104390CA	CR_09060W_A		orf19.7303	1.0458	7.05e-11
CAALFM_C301300CA	CR_05090C_A	HGT9	orf19.644	1.04131	0.120133
CAALFM_C205230CA	CR_07490C_A	GLK4	orf19.6116	1.04115	4.76e-30
CAALFM_C113070CA	C6_00890W_A		orf19.90	1.04039	1.6e-24
CAALFM_C602230WA	C2_01380W_A	PLB4.5	orf19.1442	1.03892	1.33e-10
CAALFM_CR08490WA	C1_13430C_A		orf19.4970	1.03648	0.000655233
CAALFM_C703700CA	C3_01930W_A	PXP2	orf19.1655	1.03441	0.000210429
CAALFM_C109490CA	C1_05440C_A		orf19.419	1.03042	1.53e-05
CAALFM_C503630CA	CR_04960C_A	CRG1	orf19.633	1.02976	6.26e-07
CAALFM_C111420WA	C6_02650C_A		orf19.5535	1.02848	6.26e-24
CAALFM_C110030WA	C1_04470C_A		orf19.6840	1.01668	4.33e-11
CAALFM_C303110WA	C4_01220C_A		orf19.4668	1.00952	2.85e-07
CAALFM_C502550CA	C2_05180W_A	WH11	orf19.3548.1	1.00146	0.0985209
CAALFM_C501610WA	C5_04690C_A		orf19.3954.1	0.999616	0.298345
CAALFM_C102190WA	C3_04840C_A		orf19.5952	0.99618	0.000115099
CAALFM_C210270WA	C3_00990C_A		orf19.2503	0.995606	0.0613101
CAALFM_C302020WA	C1_13180W_A		orf19.4946	0.992982	0.0227593
CAALFM_C106980CA	C2_08055W_A	SIT1	NA	0.992485	0.00012023
CAALFM_CR10140WA	C6_00470C_A	FET99	orf19.4212	0.992204	0.209504
CAALFM_C304900WA	C5_04470C_A		orf19.3932	0.991251	2.16e-12
CAALFM_CR09950CA	C5_01360W_A	CFL4	orf19.1932	0.990452	0.000358436
CAALFM_C502590CA	C3_02310W_A	MEP1	orf19.1614	0.988205	0.0360739
CAALFM_CR05630WA	C1_12940C_A		orf19.4923.1	0.986337	0.110524
CAALFM_C101660CA	C1_07980C_A		orf19.5069	0.986054	0.000221264
CAALFM_C209380WA	CR_05750W_A		orf19.6637	0.98396	3.43e-25
CAALFM_C200070CA	CR_01340W_A		orf19.2517	0.981886	0.0190534
CAALFM_C407030WA	C4_03490C_A		orf19.3376	0.980719	0.119094
CAALFM_C504760WA	C1_09900W_A	LIP3	orf19.4856	0.977542	0.203652
CAALFM_C603640WA	C2_00660C_A	SOD4	orf19.2062	0.974702	0.100228
CAALFM_C500310CA	C5_03270W_A	TEF4	orf19.2652	0.972124	0.0281144
CAALFM_C100450CA	C2_09400C_A	ERG24	orf19.1598	0.97149	6.28e-39
CAALFM_CR01920WA	CR_02180W_A	PHO113	orf19.2619	0.970964	1.72e-12
CAALFM_C111830WA	CR_04990C_A		orf19.654	0.968933	0.80208
CAALFM_C600060WA	C6_00830C_A	CAN3	orf19.84	0.968502	3.97e-14
CAALFM_C207340WA	C1_03880C_A		orf19.4461	0.968048	0.766834
CAALFM_C302480CA	C1_08880W_A	HEM14	orf19.4747	0.967623	9.17e-23
CAALFM_C505340WA	C1_09590C_A	LIP10	orf19.4822	0.967117	0.517746
CAALFM_C105060WA	C5_02110W_A		orf19.4216	0.966743	1.57e-06
CAALFM_C505230CA	C1_10740C_A	ASR1	orf19.2344	0.965663	0.0935201
CAALFM_C209350WA	C1_05150C_A		orf19.450	0.965423	0.0882315
CAALFM_CR09630WA	C3_04190W_A		orf19.5861.1	0.964227	1.45e-05
CAALFM_C109150WA	C6_03090W_A		orf19.5592	0.963552	1.55e-06
CAALFM_CR02520WA	C3_04200W_A	AFP99	orf19.5862	0.959698	3.8e-09
CAALFM_C209200WA	C6_00960W_A	CAN1	orf19.97	0.958092	0.109846
CAALFM_C700730WA	CR_00930W_A	ATO10	orf19.3263	0.956745	0.0884527
CAALFM_C304050WA	C2_00180C_A		orf19.2114	0.953558	4.69e-07
CAALFM_C304080WA	C4_01250W_A	NAT4	orf19.4664	0.953369	5.3e-23
CAALFM_CR02980CA	C1_04320W_A	GPM2	orf19.1067	0.948693	6.57e-15
CAALFM_C407150WA	CR_05810C_A		NA	0.947816	0.517173
CAALFM_C402190CA	C1_08620W_A	CTR2	orf19.4720	0.944415	7.11e-13
CAALFM_C209830CA	C1_09240C_A		orf19.4783	0.943925	1.28e-06
CAALFM_CR06950CA	C2_09220W_A	DDR48	orf19.4082	0.942799	0.0954626
CAALFM_C105500WA	C4_03100W_A	RBT7	orf19.2681	0.942509	0.0182391
CAALFM_C112590WA	C3_06860C_A		orf19.6816	0.941845	1.04e-18
CAALFM_C304510WA	C5_00660C_A	ERG11	orf19.922	0.938769	1.32e-44
CAALFM_C404020CA	C1_00880W_A		orf19.6017	0.938348	0.000174442
CAALFM_C200410CA	C3_06710W_A		orf19.6832	0.93825	6.13e-32
CAALFM_CR01910CA	C7_02240W_A	FMP45	orf19.6489	0.936576	0.067867
CAALFM_C101110CA	C4_03960W_A		orf19.787.1	0.934009	6.72e-17
CAALFM_C704140CA	C5_00470C_A	KRE62	orf19.942	0.933883	0.149131
CAALFM_C305460WA	C2_10240W_A	GPD1	orf19.1756	0.930378	4.21e-24
CAALFM_C402830CA	CR_05870W_A		NA	0.929593	0.77458
CAALFM_C205080CA	C7_01910C_A		orf19.6530	0.929495	6.79e-09
CAALFM_C604530CA	C3_04550C_A	CMK1	orf19.5911	0.926918	6.39e-32
CAALFM_C405230CA	C1_08530W_A		orf19.398	0.926319	2.39e-06
CAALFM_C108290CA	C7_03150W_A		orf19.5140	0.9259	3.32e-05
CAALFM_C104130WA	C2_00560W_A		orf19.2071	0.923114	0.809965
CAALFM_C501600CA	C1_10170W_A		orf19.4886	0.922054	0.119318
CAALFM_C306370CA	CR_02570C_A		orf19.164	0.921541	1.09e-10
CAALFM_C406720WA	C3_07010W_A	POS5	orf19.6800	0.921395	2.65e-16
CAALFM_C113080WA	C3_00480C_A	DOT5	orf19.5417	0.921265	2.78e-12
CAALFM_C702280WA	C6_03500C_A	SAP4	orf19.5716	0.918254	0.135963
CAALFM_C103990WA	C3_02300W_A	FGR23	orf19.1616	0.916286	1.95e-17
CAALFM_C704190CA	C2_10650W_A		orf19.5342.2	0.913983	1.62e-07
CAALFM_CR08970WA	C2_02790C_A		orf19.5826	0.913857	0.0414569
CAALFM_C111380WA	C2_00510W_A		orf19.2076	0.908568	6.94e-13
CAALFM_C112070CA	C2_04890C_A	ARH2	NA	0.906919	0.0576926
CAALFM_C406210CA	C1_00310W_A		orf19.6077	0.905011	4.84e-31
CAALFM_C111410CA	CR_06570C_A		orf19.915	0.903661	6.04e-14
CAALFM_C602480WA	C5_04400W_A	RNY11	orf19.3926	0.903048	0.0869687
CAALFM_C202430WA	C2_06630C_A		orf19.36.1	0.901389	0.113792
CAALFM_C600370CA	CR_07680C_A		orf19.6282	0.900558	8.36e-31
CAALFM_C207450CA	C2_01020W_A	HGT6	orf19.2020	0.899165	9.61e-41
CAALFM_C112060CA	C1_09340C_A		orf19.4795	0.89865	1.41e-11
CAALFM_C112320CA	C5_03130W_A	SUT1	orf19.4342	0.895602	0.00214218
CAALFM_C112680WA	CR_07060C_A	CRZ2	orf19.2356	0.894044	1.27e-06
CAALFM_C401580CA	C5_02080C_A	HSP12	orf19.3160	0.890384	0.000152408
CAALFM_C304430WA	C3_05270C_A	HGT5	orf19.6005	0.890038	4.73e-19
CAALFM_C209500WA	CR_08890C_A	ASR2	orf19.7284	0.888481	2.09e-09
CAALFM_C110280CA	C3_00320W_A	RHR2	orf19.5437	0.887968	7.64e-39
CAALFM_C405330CA	CR_06870C_A		orf19.1844	0.882715	0.198995
CAALFM_C601890CA	C2_03120W_A	AMO1	orf19.5784	0.881954	1.17e-05
CAALFM_CR07410CA	C1_11200W_A		orf19.2296	0.881242	4.42e-14
CAALFM_C105180CA	C2_01250W_A		orf19.1999	0.880978	2e-20
CAALFM_CR05550CA	C7_00930W_A	GPH1	orf19.7021	0.879909	3.39e-17
CAALFM_C703930CA	C1_09200W_A	LYS142	orf19.4778	0.876226	1.91e-10
CAALFM_C403730CA	C5_02690W_A		orf19.4287	0.87461	8.56e-20
CAALFM_C103420WA	C3_05660C_A		orf19.7002	0.874219	0.408446
CAALFM_C206390CA	C2_09820W_A		orf19.1368	0.872533	2.22e-16
CAALFM_CR10650WA	C1_04940C_A		orf19.750	0.872365	0.0213254
CAALFM_C204950CA	C5_00450C_A	IFG3	orf19.944	0.872126	9.05e-18
CAALFM_C109120WA	C6_02550W_A		orf19.5524	0.871507	0.00547619
CAALFM_CR10750CA	C5_03890C_A		orf19.1105.3	0.869273	0.354408
CAALFM_C110620WA	C1_10550C_A	GCA2	orf19.999	0.868784	9.42e-08
CAALFM_C110260CA	CR_09070C_A		orf19.7304	0.865736	3.24e-30
CAALFM_C402790CA	C3_03580C_A	GTT13	orf19.356	0.865229	0.248999
CAALFM_CR06190CA	CR_09290W_A	THI13	orf19.7324	0.861689	2.46e-15
CAALFM_C210090CA	C1_09580C_A	LIP1	orf19.4821	0.859918	0.0108532
CAALFM_C108750WA	C4_06550C_A	IFF5	orf19.2879	0.85907	2.5e-21
CAALFM_C209340WA	CR_08310C_A		orf19.6398	0.858617	0.23461
CAALFM_C101920WA	C6_01780C_A		orf19.3406	0.858095	5.43e-12
CAALFM_C100900WA	C2_02640C_A		orf19.1589.1	0.852924	0.032395
CAALFM_C501480WA	C1_09690W_A	MLS1	orf19.4833	0.851764	4.95e-07
CAALFM_CR10410CA	CR_04120C_A		orf19.496	0.851558	7.71e-17
CAALFM_C304340WA	C2_00740C_A		orf19.2050	0.84939	6.37e-27
CAALFM_C107660WA	CR_09340W_A		orf19.7329	0.846833	1.29e-18
CAALFM_C407140WA	C5_01670W_A	DAL52	orf19.3208	0.845963	0.0677206
CAALFM_C401450WA	CR_02400W_A	PHO112	orf19.3727	0.843992	0.00177435
CAALFM_C203740WA	C6_02760W_A		orf19.5549	0.843818	0.00162183
CAALFM_C208840WA	CR_08800W_A	NA	NA	0.843728	4.44e-07
CAALFM_C113100WA	C1_08430W_A	CAF16	orf19.388	0.842654	1.21e-18
CAALFM_CR01300WA	C5_02460C_A	ECM331	orf19.4255	0.842463	4.07e-07
CAALFM_C208180CA	C6_02200C_A		orf19.3460	0.842117	2.09e-06
CAALFM_C500680WA	C1_02600W_A	SNO1	orf19.2948	0.840272	8.87e-13
CAALFM_C305140CA	C6_04420W_A		orf19.2125	0.839989	0.080908
CAALFM_CR02620CA	CR_10330W_A	PGA11	orf19.7609	0.83896	0.000251161
CAALFM_C701760CA	C1_00150C_A	RIM8	orf19.6091	0.838895	1.66e-22
CAALFM_C205840WA	C1_01930W_A		orf19.4530.1	0.838731	1.84e-18
CAALFM_C101380CA	C6_03320W_A		orf19.5621	0.833667	3.04e-21
CAALFM_CR07420WA	C4_05780C_A	CFL2	orf19.1264	0.829837	0.0817502
CAALFM_C202740CA	C3_06790W_A	TRY6	orf19.6824	0.823812	0.119571
CAALFM_C106810WA	C5_02380W_A		orf19.4246	0.822905	1.06e-34
CAALFM_C501130WA	C2_09710C_A		orf19.1381	0.822327	6.2e-13
CAALFM_C302040CA	C1_02590C_A	SNZ1	orf19.2947	0.821847	3.24e-07
CAALFM_CR03650WA	C4_00980C_A	MRV1	orf19.4691	0.821574	0.224076
CAALFM_C403030CA	C2_05360C_A	BIO32	orf19.3567	0.820973	4.32e-07
CAALFM_C107790CA	C2_04480W_A		orf19.4504	0.820481	3.07e-08
CAALFM_C203110WA	C7_00880C_A		orf19.7027	0.818696	2.73e-12
CAALFM_C109040CA	CR_10200W_A		orf19.7596	0.81811	0.0170207
CAALFM_C209890WA	CR_00750C_A		orf19.3281	0.817444	1.97e-13
CAALFM_C406760WA	C2_00460W_A	SAP30	orf19.2082	0.816958	0.0351693
CAALFM_CR10260WA	C3_05450C_A		orf19.6983	0.815966	1.18e-17
CAALFM_C501520CA	C1_03550C_A	COQ6	orf19.3058	0.81575	1.1e-25
CAALFM_C304150WA	CR_07820W_A		orf19.3711	0.815196	0.0290907
CAALFM_C402050WA	C5_03240W_A	BUB3	orf19.2655	0.814898	4.13e-16
CAALFM_CR09730CA	CR_04590C_A	PDX3	orf19.550	0.814355	5.07e-29
CAALFM_C206800CA	C4_00720W_A	CSP2	orf19.4170	0.814305	2.41e-17
CAALFM_C201070WA	C2_05130W_A		orf19.3544	0.810798	5.1e-08
CAALFM_CR03660CA	C7_01170C_A		orf19.6899	0.810503	0.000468915
CAALFM_C113060CA	C5_02930C_A	GRE3	orf19.4317	0.810042	4.9e-15
CAALFM_C304380CA	C5_00930C_A	TFS1	orf19.1974	0.809306	3.16e-14
CAALFM_C208550CA	CR_05720W_A	TPS1	orf19.6640	0.804282	5.11e-28
CAALFM_C206850WA	C2_01980C_A	SRD1	orf19.1510	0.804171	3.67e-16
CAALFM_C106050CA	C2_04190C_A	UGA1	orf19.802	0.804113	8.22e-08
CAALFM_C301610WA	CR_07300W_A		orf19.6138	0.803706	0.186193
CAALFM_C500850CA	C6_04200C_A	NA	orf19.1075.1	0.80344	0.00555615
CAALFM_C201180WA	C1_02700C_A		orf19.2959.1	0.802251	2.85e-08
CAALFM_CR05570CA	C1_10500W_A		orf19.993	0.800011	2.57e-15
CAALFM_C501160CA	C3_05600W_A	ATO6	orf19.6995	0.797322	0.000360667
CAALFM_C208650WA	C1_13510C_A	TGL99	orf19.4982	0.797295	1.33e-15
CAALFM_CR07030CA	C5_05450C_A	MUM2	orf19.4044	0.795155	5.97e-16
CAALFM_C202510WA	C4_06270C_A	ERG26	orf19.2909	0.79277	7.44e-27
CAALFM_C205340CA	C6_01990W_A	PLB1	orf19.689	0.790417	0.000580286
CAALFM_C113130CA	C5_02630C_A	MNN1	orf19.4279	0.790405	0.0515973
CAALFM_CR06220CA	C4_05140C_A	GDB1	orf19.744	0.787885	6.26e-12
CAALFM_CR01950WA	C4_03430W_A	MOH1	orf19.3369	0.785484	0.000262726
CAALFM_C106760CA	C3_03020W_A		orf19.298	0.785064	0.365543
CAALFM_C603480WA	C2_05860C_A		orf19.5210	0.784925	4.35e-06
CAALFM_C504570CA	CR_06860C_A	ARO10	orf19.1847	0.784188	1.05e-31
CAALFM_C109630WA	C5_05210W_A		orf19.4014	0.782006	5.46e-14
CAALFM_CR00650WA	C1_09250W_A	CRP1	orf19.4784	0.781599	1.79e-08
CAALFM_C302800WA	C1_12720C_A		orf19.6350	0.781538	0.203202
CAALFM_C104360CA	C1_04930C_A		orf19.751	0.779536	0.00443199
CAALFM_C604320CA	C5_03510C_A		orf19.6660	0.777496	2.3e-08
CAALFM_CR06630WA	C4_01070W_A	HGT17	orf19.4682	0.776174	0.390373
CAALFM_CR04750WA	C2_09850C_A		orf19.1366	0.771875	0.0578618
CAALFM_C208880WA	C1_07580C_A	PRY1	orf19.2787	0.771282	0.384482
CAALFM_C111000CA	C5_00880C_A	GIT3	orf19.1979	0.77012	7.04e-10
CAALFM_C103700CA	C2_06880C_A	PRB1	orf19.2242	0.768522	6.13e-08
CAALFM_C106740CA	C2_05820W_A		orf19.5205	0.766721	2.2e-10
CAALFM_C302350WA	CR_07790C_A	YHB1	orf19.3707	0.765763	1.16e-10
CAALFM_CR03530WA	C3_06670C_A		orf19.7456	0.765347	5.11e-11
CAALFM_C111530CA	CR_09010C_A		orf19.7297	0.762532	5.76e-25
CAALFM_C110810WA	C5_00600C_A		orf19.929	0.762046	0.234643
CAALFM_C204590CA	C2_09980W_A		orf19.1785	0.7614	5.12e-12
CAALFM_C700690WA	C4_03000C_A		orf19.2691	0.760448	3.83e-09
CAALFM_C102650WA	C2_05070W_A	FRE9	orf19.3538	0.7598	3.46e-10
CAALFM_C108810CA	C1_13920W_A	DOS2	orf19.5030	0.75805	1.79e-18
CAALFM_C601040CA	C6_03260W_A		orf19.5614	0.757575	1.57e-08
CAALFM_C603130WA	C4_04470W_A	SAP10	orf19.3839	0.754796	1.01e-07
CAALFM_C304370CA	C2_07600C_A	MSC7	orf19.1865	0.753056	1.69e-28
CAALFM_C200750WA	C4_03180W_A	NCP1	orf19.2672	0.752964	3.15e-31
CAALFM_C405650WA	C4_01860C_A		orf19.4607	0.752497	8.81e-12
CAALFM_C701900WA	CR_09610C_A		orf19.6601	0.751918	9e-12
CAALFM_C108870CA	C1_10240C_A		orf19.4894	0.750963	0.00245946
CAALFM_C504370CA	C3_00760W_A	ERG4	orf19.5379	0.749757	8.37e-19
CAALFM_C501060CA	C1_12330W_A		orf19.5231	0.748213	0.581443
CAALFM_C602040WA	CR_02960W_A		orf19.2853	0.746283	3.01e-07
CAALFM_C105050CA	C5_05190W_A	PCL5	orf19.4012	0.746157	1.36e-07
CAALFM_C303390CA	CR_04510W_A	HXK2	orf19.542	0.746046	9.54e-32
CAALFM_C205500WA	C3_06270C_A		orf19.7405	0.744759	7.36e-13
CAALFM_C302940CA	C4_02100C_A		orf19.4581	0.744725	1.15e-10
CAALFM_CR10100CA	C5_01290C_A		orf19.1940	0.741659	1.53e-13
CAALFM_C108930CA	C6_01310W_A	FIG1	orf19.138	0.740772	0.25312
CAALFM_C306570CA	C1_08070W_A	CDR4	orf19.5079	0.738682	1.71e-19
CAALFM_C113200CA	C6_02500C_A	GCV1	orf19.5519	0.738307	4.49e-09
CAALFM_CR04360CA	C1_07030C_A	RBT4	orf19.6202	0.736599	3.15e-12
CAALFM_CR09920WA	CR_02900W_A	NA	orf19.2847.1	0.73507	0.1667
CAALFM_C204170CA	C1_10300W_A	MNN12	orf19.4900	0.734438	5.95e-11
CAALFM_C112600CA	CR_08530C_A		NA	0.731365	0.249382
CAALFM_CR08240WA	C7_04080C_A		orf19.7167	0.73133	0.743307
CAALFM_CR07950WA	C1_00030C_A		orf19.6113	0.730184	4.17e-05
CAALFM_C107800WA	C1_04590W_A		orf19.6852.1	0.729787	0.0354631
CAALFM_C204030CA	C1_00810W_A		orf19.6025	0.728129	0.0168301
CAALFM_C101910WA	C1_08900W_A		orf19.4749	0.726819	7.39e-22
CAALFM_CR03360WA	C7_01670W_A		orf19.6557	0.726268	3.57e-07
CAALFM_C205570CA	CR_01860W_A	NA	orf19.2584	0.725184	0.225439
CAALFM_C207990WA	C1_14300C_A	NCR1	orf19.7242	0.724201	6.75e-17
CAALFM_C207540WA	C2_02460W_A	ERG7	orf19.1570	0.720291	4.71e-11
CAALFM_C400810CA	C2_06590C_A	GIT1	orf19.34	0.719559	1.66e-07
CAALFM_CR10470CA	C7_03860W_A		orf19.7196	0.715333	3.43e-12
CAALFM_C300560CA	C5_05510C_A		orf19.4055	0.712566	2.76e-06
CAALFM_C107150WA	C3_06490W_A		orf19.7437	0.710377	4.23e-16
CAALFM_C206440CA	CR_09350C_A		orf19.7330	0.710221	0.285753
CAALFM_C109550WA	C4_01850C_A	PDC12	orf19.4608	0.707139	9.5e-07
CAALFM_C702330WA	C1_13470W_A	KNS1	orf19.4979	0.706873	0.000187809
CAALFM_C111070WA	C1_01360C_A		orf19.3325	0.704778	2.21e-28
CAALFM_C206890CA	C1_08830C_A		orf19.4741	0.704367	0.01126
CAALFM_C104610WA	C1_05310W_A	PRD1	NA	0.703769	0.617778
CAALFM_C102300WA	C7_01230C_A		orf19.6905	0.702588	8.08e-19
CAALFM_C205960CA	C5_01570C_A	SPO1	orf19.4151	0.700205	0.0494959
CAALFM_C602690CA	C4_01240C_A		orf19.4665	0.700062	1.37e-11
CAALFM_C202450CA	C2_06840W_A	SPR1	orf19.2237	0.698082	0.522814
CAALFM_C200790CA	C7_00870W_A		orf19.7029	0.697389	0.0598852
CAALFM_C307750WA	C2_06940C_A	ARE2	orf19.2248	0.691238	6.26e-06
CAALFM_C202310WA	C1_13440C_A	OFI1	orf19.4972	0.689445	0.0542041
CAALFM_CR05620CA	C4_05900C_A		orf19.1277	0.689037	7.73e-15
CAALFM_C111870WA	C1_06870C_A		orf19.6222.1	0.688589	0.000171174
CAALFM_CR04710WA	C4_03310C_A		orf19.1440.1	0.687545	0.502012
CAALFM_CR06490CA	C2_04230W_A	BAT21	orf19.797	0.687165	1.55e-11
CAALFM_C105230WA	C5_05390C_A	PGA4	orf19.4035	0.687096	3.71e-11
CAALFM_CR06460WA	C3_03130C_A		orf19.310	0.684984	0.621276
CAALFM_C202070WA	CR_03040C_A	HGT18	orf19.2425	0.684687	2.28e-17
CAALFM_C101490WA	C1_04800C_A		orf19.762	0.684657	0.335385
CAALFM_CR01640CA	C2_03790C_A	ASR3	orf19.842	0.684569	4.48e-09
CAALFM_C109500WA	CR_02820W_A	PGM2	orf19.2841	0.683651	7.44e-15
CAALFM_CR00680WA	C2_01560W_A	BMT5	orf19.1464	0.682015	1.39e-15
CAALFM_CR05470CA	C4_04770C_A	MNN22	orf19.3803	0.680109	1.08e-06
CAALFM_C703400CA	C1_10980W_A		orf19.2317	0.679055	0.0255075
CAALFM_C306060WA	C1_11490C_A	BTA1	orf19.1171	0.677756	0.231714
CAALFM_C104820CA	C1_13850C_A	DAL7	orf19.5023	0.677458	0.198895
CAALFM_C703550CA	C3_03350W_A		NA	0.676231	2.08e-09
CAALFM_C206290CA	CR_01400W_A	LYS12	orf19.2525	0.676112	4.63e-11
CAALFM_C107950CA	C3_06920W_A		orf19.6809	0.672807	2.55e-16
CAALFM_C303340CA	C5_04800W_A	CRH12	orf19.3966	0.671201	3.11e-11
CAALFM_CR04740CA	C6_00840W_A	GPX2	orf19.85	0.671162	5.03e-25
CAALFM_C200170CA	C2_07530C_A		orf19.1874	0.670893	0.475285
CAALFM_CR09370WA	C1_09060C_A		orf19.4763	0.670726	8.28e-15
CAALFM_C502120CA	C1_09720W_A	URA1	orf19.4836	0.670149	3.24e-18
CAALFM_CR01310WA	CR_08700C_A	ARF1	orf19.6447	0.668989	1.72e-11
CAALFM_C200610CA	C7_02840C_A	ERG5	orf19.5178	0.668954	9.55e-19
CAALFM_C206960WA	C1_09600C_A	LIP6	orf19.4823	0.667768	7.17e-08
CAALFM_C404970CA	C1_09310C_A		orf19.4791	0.666927	1.51e-05
CAALFM_C602400WA	CR_02880W_A		orf19.2846	0.666916	0.00055232
CAALFM_C113040CA	C1_14130W_A	FTR1	orf19.7219	0.66677	5.09e-10
CAALFM_C400700CA	C5_00100C_A		orf19.5686	0.666533	5.29e-06
CAALFM_C101030WA	C1_11660W_A	GAD1	orf19.1153	0.66572	4.41e-06
CAALFM_C602380WA	C1_05560W_A	RIB4	orf19.410.3	0.665033	1.51e-15
CAALFM_CR01900CA	CR_05410C_A	PST3	NA	0.664795	0.679483
CAALFM_CR02310CA	C6_04480C_A		orf19.2132	0.664557	2.87e-18
CAALFM_CR01740WA	C3_04730C_A		orf19.5933	0.663681	0.275089
CAALFM_C404150CA	C1_14180W_A		orf19.7225	0.662075	0.00709337
CAALFM_CR03550WA	C6_02560W_A		orf19.5525	0.661092	1.17e-13
CAALFM_C504990WA	C1_10430W_A	PHO8	orf19.984	0.661066	0.0565349
CAALFM_C208480WA	CR_09670C_A		orf19.6596	0.660684	2.3e-09
CAALFM_CR03940WA	C2_04300C_A		orf19.1592	0.660663	8.27e-09
CAALFM_CR01710WA	CR_02060W_A		orf19.2607	0.659944	6.75e-16
CAALFM_C111550WA	C3_00050C_A		orf19.5370	0.659803	0.00936861
CAALFM_C110880WA	C2_01650W_A		orf19.1476	0.659465	0.00808738
CAALFM_C112280CA	C1_03380W_A	TPS2	orf19.3038	0.659309	2.99e-18
CAALFM_CR10350CA	C1_12470W_A		orf19.69	0.655987	0.0041043
CAALFM_C109700WA	C2_05660W_A	PNG2	orf19.6877	0.65563	7.15e-05
CAALFM_C402750WA	C4_02820W_A		orf19.2713	0.654318	0.434478
CAALFM_C405170CA	C1_03470C_A		orf19.3049	0.652847	0.462461
CAALFM_C402260CA	CR_02130W_A	ECM4	orf19.2613	0.652729	9.79e-08
CAALFM_C102880CA	CR_09360W_A	FCY24	orf19.7331	0.652066	2.98e-06
CAALFM_C202970CA	C5_02430W_A	ZCF22	orf19.4251	0.651953	7.64e-05
CAALFM_C306220CA	C1_04760C_A	SYG1	orf19.768	0.650412	1.8e-07
CAALFM_C304160WA	C2_06870C_A	PST1	orf19.2241	0.650205	0.0467382
CAALFM_C109020WA	C2_03630W_A		orf19.855	0.648956	0.399939
CAALFM_C703790WA	C7_01780W_A	LPI9	orf19.6544	0.648852	9.1e-15
CAALFM_C300410CA	C5_02520W_A		orf19.4264	0.648615	1.08e-06
CAALFM_C107920WA	C1_04700C_A		orf19.775	0.64792	1.91e-14
CAALFM_C602370CA	C1_06920C_A		orf19.6219	0.645051	1.07e-08
CAALFM_C110250CA	C2_09460C_A		orf19.1604	0.644723	6.06e-16
CAALFM_C401500WA	C6_01400W_A		orf19.3444	0.644544	0.0439702
CAALFM_C303190CA	CR_00300W_A	CDA2	orf19.7503	0.644468	0.123468
CAALFM_C301410CA	C3_02790W_A		orf19.270	0.64099	0.130881
CAALFM_C402480CA	C1_02680C_A		orf19.2958	0.640474	2.17e-08
CAALFM_C103390WA	C4_01100C_A	AGP2	orf19.4679	0.638646	6e-06
CAALFM_C201740CA	C2_04280W_A		orf19.792	0.63841	2.75e-06
CAALFM_C107220WA	C2_04340C_A		orf19.4520	0.637734	1.79e-06
CAALFM_C603440WA	C2_08130W_A	ARA1	orf19.2172	0.637146	4.35e-08
CAALFM_C603210CA	C3_03640W_A	DAL9	orf19.6956	0.637135	9.19e-05
CAALFM_C403820CA	C3_02880W_A		orf19.279	0.636294	0.227641
CAALFM_C109560CA	C4_07260W_A		orf19.3073	0.63594	0.685889
CAALFM_C700760CA	CR_01440C_A		orf19.2529.1	0.633422	0.0534064
CAALFM_C302730CA	C4_04050C_A	RHD3	orf19.5305	0.632859	1.48e-09
CAALFM_C400480WA	C1_08840W_A		orf19.4742	0.632128	0.00361771
CAALFM_CR03920CA	CR_03730C_A		orf19.4372	0.631809	1.11e-06
CAALFM_CR06480CA	CR_07480W_A		orf19.6117	0.631727	0.000835359
CAALFM_C300460WA	C3_02540C_A	OXR1	orf19.243	0.630576	1.71e-09
CAALFM_C108050WA	C1_05160C_A		orf19.449	0.629947	1.08e-06
CAALFM_C110850WA	C2_03020C_A		orf19.5799	0.627131	1.59e-17
CAALFM_CR00380WA	C1_04750W_A	IFE1	orf19.769	0.627088	0.00121176
CAALFM_C113820CA	C5_03490C_A		orf19.6658	0.627004	7.96e-07
CAALFM_C300370CA	C5_04810W_A	PFK1	orf19.3967	0.626896	5.55e-10
CAALFM_C205060CA	C1_06000W_A		orf19.2445	0.626885	0.13777
CAALFM_C210180WA	CR_02350C_A	GEF2	orf19.3734	0.625799	1e-12
CAALFM_C306050CA	C6_03880W_A		orf19.5763	0.623653	1.12e-06
CAALFM_C404720WA	C2_05900W_A		orf19.5212	0.622805	0.65028
CAALFM_C208420WA	CR_08840C_A	NIT2	orf19.7279	0.622308	6.29e-07
CAALFM_C703350CA	C2_04110W_A		orf19.810	0.620496	0.00605989
CAALFM_C503700CA	C1_11210C_A	HAP43	orf19.681	0.619866	1.55e-12
CAALFM_CR05850WA	C1_12700W_A		orf19.6353	0.616054	1.27e-06
CAALFM_C208000CA	C1_12160W_A	MSO1	orf19.5248	0.614666	1.52e-11
CAALFM_C205300CA	C2_06550W_A		orf19.31	0.614273	1.87e-06
CAALFM_C405260WA	C1_06940C_A	ATC1	orf19.6214	0.613551	1.7e-13
CAALFM_C603400CA	CR_04480C_A	LAP3	orf19.539	0.611702	2.25e-17
CAALFM_C107000WA	C1_03160C_A	COQ4	orf19.3008	0.610852	4.09e-14
CAALFM_C114160WA	CR_09220C_A	LIP7	orf19.7320	0.609789	0.0842484
CAALFM_C401990WA	CR_09210W_A	SUC1	orf19.7319	0.609715	1.36e-06
CAALFM_C105640CA	CR_01250C_A		orf19.3229	0.609484	0.71599
CAALFM_C207380WA	C1_13190W_A		orf19.4947	0.609328	2e-18
CAALFM_CR07370WA	C5_05220W_A	CAG1	orf19.4015	0.608559	0.0132932
CAALFM_C205620WA	C4_03890W_A	PTP2	orf19.5045	0.608325	0.00015138
CAALFM_CR00480WA	C5_04050W_A		orf19.1285	0.607612	3.45e-13
CAALFM_C106540CA	C3_07670W_A		orf19.6720	0.607564	0.000260054
CAALFM_C105630CA	C1_00270W_A		orf19.6078.1	0.607452	2.14e-11
CAALFM_C112350WA	CR_03470W_A		orf19.4390	0.605924	8.54e-14
CAALFM_C111320CA	C6_03860C_A	PGA61	orf19.5762	0.604546	0.0237975
CAALFM_C207680WA	C1_14060W_A		orf19.7214	0.603796	1.68e-10
CAALFM_CR01930CA	C1_04580C_A		orf19.6852	0.603637	2.42e-07
CAALFM_C304660CA	C3_01820W_A		orf19.1664	0.602315	5.1e-14
CAALFM_C400200CA	C2_07840W_A		orf19.2197	0.601078	0.549901
CAALFM_CR10690WA	CR_00740C_A	BMT3	orf19.3282	0.600947	0.000846595
CAALFM_C703880CA	C3_03500W_A	SKN2	orf19.348	0.600531	4.33e-09
CAALFM_C108080CA	C2_01710W_A	HSK3	orf19.1482	0.60042	4.32e-07
CAALFM_C307060WA	C4_02660W_A		orf19.2734	0.600243	0.05787
CAALFM_C112440WA	C5_03150W_A		orf19.4347	0.599491	4.46e-08
CAALFM_C403440CA	C7_02140W_A		orf19.6501	0.598786	0.0460899
CAALFM_C406610CA	C5_02800C_A		orf19.4305	0.597965	0.219173
CAALFM_C400960WA	C3_05620W_A	ATO5	orf19.6997	0.597581	0.118689
CAALFM_C112610WA	CR_06100C_A		orf19.3863	0.596671	0.0889599
CAALFM_C501710CA	C4_02410C_A	AHP1	orf19.2762	0.596667	5.93e-07
CAALFM_C100990CA	C1_11270W_A		orf19.675	0.596398	0.000721321
CAALFM_C402210WA	CR_01140C_A	ERG27	orf19.3240	0.595368	1.6e-13
CAALFM_C210770WA	C1_06160W_A		orf19.2429	0.594836	0.566751
CAALFM_C701640WA	C1_10060C_A		orf19.4873	0.594584	0.0967043
CAALFM_C210800WA	C3_07590W_A		orf19.6731	0.594027	0.000934215
CAALFM_C403950CA	C1_01290C_A		orf19.3318	0.593759	1.46e-10
CAALFM_C100590WA	C6_00750C_A	PGK1	orf19.3651	0.593401	4.01e-17
CAALFM_CR07310WA	C1_01610C_A		orf19.3351	0.591886	0.0109931
CAALFM_C207410WA	C2_08120W_A	MAF1	orf19.2173	0.590434	5.19e-08
CAALFM_C106570WA	C2_09860C_A		orf19.1365	0.589973	0.000763401
CAALFM_C504140WA	C1_05300C_A	PRD1	orf19.434	0.589709	7.09e-18
CAALFM_C701020CA	C3_05360C_A		orf19.6973	0.589638	5.82e-12
CAALFM_C202120WA	C3_02870C_A		orf19.278	0.589079	0.0149187
CAALFM_C402890CA	C2_09750W_A	LEU42	orf19.1375	0.588383	9.92e-14
CAALFM_C700330CA	C4_02620C_A		orf19.2737	0.587856	1.88e-15
CAALFM_C107890CA	CR_06550C_A		orf19.711	0.587783	0.00442068
CAALFM_C300420WA	C4_03460C_A		orf19.3373	0.586872	0.0460263
CAALFM_C500640CA	CR_05930C_A	MHP1	NA	0.586129	0.442673
CAALFM_C203950WA	CR_09590W_A		orf19.6602	0.584215	2.79e-05
CAALFM_C400270WA	C4_03710C_A		orf19.1307	0.584161	1.4e-05
CAALFM_C208670CA	C2_08360C_A	OPT5	orf19.5121	0.583767	0.728762
CAALFM_C303210WA	C2_07710W_A		orf19.2211	0.582639	0.167881
CAALFM_CR02420WA	C4_04710W_A	GYP1	orf19.3811	0.582439	1.1e-07
CAALFM_CR03380WA	CR_09270C_A	CBP1	orf19.7323	0.581853	3.97e-11
CAALFM_C501140CA	C3_04130W_A		orf19.5857	0.581654	5.68e-12
CAALFM_C101010WA	C1_05000W_A	RHD1	orf19.54	0.580575	2.38e-07
CAALFM_C302050CA	CR_00020W_A	TLO1	orf19.7544	0.579189	1.13e-11
CAALFM_C111880WA	C2_03860W_A	INO4	NA	0.579167	0.548982
CAALFM_C603730CA	C2_10560C_A	ZSF1	orf19.5334	0.579064	0.000243347
CAALFM_C103350CA	C1_05760C_A	PGA26	orf19.2475	0.576727	0.016853
CAALFM_C401080WA	C3_03120C_A	DAL5	orf19.309	0.574924	0.00352535
CAALFM_C205270WA	C1_11670W_A		orf19.1152	0.57439	4.69e-07
CAALFM_C601930WA	C5_03610W_A	HEX1	orf19.6673	0.574144	2.27e-07
CAALFM_CR03840CA	C1_13620W_A	ROB1	orf19.4998	0.573494	2.77e-06
CAALFM_C602800WA	C7_00310C_A		orf19.7091	0.573373	0.000460344
CAALFM_C407110CA	C2_03350W_A	PGA17	orf19.893	0.573302	0.327011
CAALFM_C301120WA	CR_10360C_A	CTM1	orf19.7612	0.572692	1.92e-13
CAALFM_CR05220CA	C1_12560C_A	DLH1	orf19.3760	0.571464	0.397481
CAALFM_C112760WA	C4_06220C_A		orf19.2916	0.570843	0.45964
CAALFM_CR00460CA	C1_13530W_A	NA	orf19.4984	0.570262	2.96e-10
CAALFM_C403270WA	C1_01840C_A		orf19.4539	0.570078	5.56e-07
CAALFM_C301150CA	C3_02330C_A		orf19.1611	0.569237	0.000150821
CAALFM_CR02530WA	C2_00340C_A	ARO8	orf19.2098	0.568848	5.96e-19
CAALFM_C400520WA	C3_06140W_A		orf19.7396	0.568684	1.6e-05
CAALFM_C100640CA	C1_00170W_A	LEU4	orf19.6086	0.568351	0.000703207
CAALFM_C307600WA	C4_01760W_A		orf19.4617	0.567737	6.72e-07
CAALFM_CR03270WA	C3_02360C_A		orf19.1608	0.566951	0.0312247
CAALFM_C100560WA	CR_07700W_A		orf19.1985	0.56628	3.03e-05
CAALFM_C207000WA	C3_07340W_A	GCY1	orf19.6757	0.565914	0.00167756
CAALFM_C205760CA	C4_03760W_A		orf19.1302	0.564459	0.427863
CAALFM_C405110CA	C1_00020C_A		orf19.6114	0.564145	8.42e-10
CAALFM_C204790CA	C6_01900C_A	DOG1	orf19.3392	0.563387	1.75e-06
CAALFM_C104880CA	C3_04000C_A	CTN3	orf19.2809	0.563382	0.00895429
CAALFM_C303470WA	C1_05140W_A	BRG1	orf19.4056	0.562677	1.09e-06
CAALFM_C107710CA	CR_04440C_A	RBR1	orf19.535	0.560461	0.737583
CAALFM_C405560CA	C2_03710W_A		orf19.849	0.559228	0.612899
CAALFM_C205980CA	C1_00580W_A		orf19.6048	0.55712	3.91e-05
CAALFM_C105650WA	C2_05770W_A		orf19.6888	0.556895	0.00281554
CAALFM_C306840CA	C1_03150C_A		orf19.3007.2	0.555264	4.13e-08
CAALFM_C603110CA	C3_05230W_A	SAP3	orf19.6001	0.555087	0.251358
CAALFM_CR00030WA	CR_05740C_A	PTC4	orf19.6638	0.554902	3.89e-09
CAALFM_CR03370CA	C4_05460C_A	OFD1	orf19.1802	0.554722	8.63e-07
CAALFM_CR01600CA	CR_10790W_A	MAL2	orf19.7668	0.554479	0.00171205
CAALFM_CR07750CA	CR_08830W_A		orf19.7279.1	0.553546	0.304056
CAALFM_C602290CA	CR_04250W_A		orf19.513	0.550734	0.393291
CAALFM_C307800CA	C6_00980C_A		orf19.100	0.550452	3.13e-05
CAALFM_C401630CA	CR_10770W_A		orf19.7666	0.550188	1.8e-07
CAALFM_C100410CA	CR_00780C_A	GSY1	orf19.3278	0.549033	1.23e-08
CAALFM_C501180WA	C4_05130C_A	ALD6	orf19.742	0.548464	0.0122282
CAALFM_C505290CA	C3_06550C_A		orf19.7444	0.548377	1.42e-05
CAALFM_C210780CA	C3_04580C_A	STP1	orf19.5917	0.546913	5.73e-08
CAALFM_C602900CA	C1_08400C_A	GCV2	orf19.385	0.546664	0.0698753
CAALFM_C111450CA	C7_03460W_A		orf19.1330	0.545872	0.0448908
CAALFM_C402850WA	C7_00170W_A	VPS70	orf19.7106	0.544473	2.92e-08
CAALFM_CR04870CA	C1_13590W_A		orf19.4995	0.544441	0.0413367
CAALFM_C402800WA	C2_04970W_A	ABP2	orf19.3529	0.543083	1.17e-07
CAALFM_C403740WA	C2_08050C_A	SIT1	orf19.2179	0.542995	0.00865323
CAALFM_C205420CA	C2_07580W_A		orf19.1867	0.542645	0.00238936
CAALFM_C603070CA	C1_14120C_A	RBE1	orf19.7218	0.542504	1.61e-05
CAALFM_C300330WA	C1_02800W_A		orf19.2968	0.542105	0.0993703
CAALFM_C209360WA	CR_07220C_A		orf19.6148	0.541802	1.89e-09
CAALFM_C202630WA	C5_03420W_A		NA	0.539899	0.819332
CAALFM_C702120CA	C3_06280W_A		orf19.7404	0.53969	2.37e-11
CAALFM_CR09740WA	C3_05390C_A	GPI1	orf19.6977	0.539679	5.94e-07
CAALFM_C306850WA	C2_07970W_A	NSA1	NA	0.539638	0.819422
CAALFM_C503850WA	C1_06340W_A		orf19.6277	0.539346	0.00639267
CAALFM_C402650CA	CR_03450W_A	HXT5	orf19.4384	0.539142	0.00143391
CAALFM_C109710CA	CR_09600C_A	YKE2	orf19.6601.1	0.539098	7.64e-14
CAALFM_C204680WA	C2_01000W_A	HGT7	orf19.2023	0.539037	5.28e-11
CAALFM_C113830CA	C3_06480C_A	ECM15	orf19.7436.1	0.53894	2.42e-10
CAALFM_C200050CA	C7_01540W_A	ALK6	orf19.6574	0.538493	0.168649
CAALFM_C602390WA	C6_03610W_A	FGR17	orf19.5729	0.538267	0.000197599
CAALFM_CR07320CA	C2_03800C_A		orf19.841	0.53732	6.81e-06
CAALFM_C701160CA	C1_10700C_A	NIT3	orf19.2351	0.535445	6.29e-09
CAALFM_C703630CA	C4_04990C_A		orf19.3781	0.534903	0.00442892
CAALFM_CR06040WA	CR_03580C_A		orf19.4384.1	0.533645	0.0274464
CAALFM_C100490CA	C7_03440W_A	SNG4	orf19.1332	0.533578	1.35e-08
CAALFM_C702680WA	C3_03530W_A		orf19.351	0.53342	0.00267865
CAALFM_C702340CA	C1_01140C_A		orf19.3302	0.531705	3.56e-10
CAALFM_C700430WA	C1_12880C_A		orf19.4918	0.531656	4.79e-06
CAALFM_CR06330CA	CR_01470W_A	CSP37	orf19.2531	0.531337	4.48e-08
CAALFM_C112090CA	C1_00290W_A	POL93	orf19.6078	0.531056	2.92e-10
CAALFM_C210150WA	CR_03690W_A		orf19.4368	0.530843	9.96e-07
CAALFM_C505250CA	C3_07240W_A		orf19.6777	0.530576	0.331954
CAALFM_C206000WA	C2_08620W_A		orf19.3615	0.530262	4.7e-08
CAALFM_CR03350CA	C4_05300W_A	XKS1	orf19.1290	0.529985	3.19e-06
CAALFM_C702460CA	CR_05440W_A		orf19.3515	0.529833	3.02e-08
CAALFM_C106060CA	C7_03580C_A		orf19.6690	0.528762	3.07e-06
CAALFM_C202680WA	CR_04060C_A	DAP1	orf19.489	0.528152	1.43e-12
CAALFM_CR03110WA	C7_00910C_A		orf19.7023	0.528083	1.69e-07
CAALFM_C205600WA	C4_00160C_A	CAR2	orf19.5641	0.527955	7.93e-05
CAALFM_C404810CA	C1_14630C_A		orf19.7278	0.526972	1.13e-05
CAALFM_C500260WA	C1_05950C_A		orf19.2452	0.526822	7.89e-16
CAALFM_C107500CA	C6_03250W_A	BMT4	orf19.5612	0.526765	0.00518759
CAALFM_C404820CA	C4_01550C_A	CPA1	orf19.4630	0.526132	0.325081
CAALFM_C203560CA	CR_08650C_A		orf19.6440	0.525862	1.97e-11
CAALFM_C402130WA	C1_02780W_A		orf19.2966	0.52497	1.78e-13
CAALFM_C302810CA	C6_00440C_A	FET34	orf19.4215	0.524955	8.7e-07
CAALFM_C210360CA	C4_05800C_A		orf19.1266	0.524863	0.000104962
CAALFM_CR06140WA	C3_05080W_A		orf19.5978	0.524597	0.0083278
CAALFM_CR02650CA	C1_08240C_A		orf19.5103	0.524411	1.7e-05
CAALFM_CR04270CA	CR_03850W_A	HGT3	orf19.4356	0.524163	4.04e-05
CAALFM_CR09450CA	C6_02210W_A		orf19.3461	0.523956	0.000333744
CAALFM_C207890WA	C3_05990C_A		orf19.7380	0.523809	2.92e-10
CAALFM_C304520CA	C2_00580C_A	SMF3	orf19.2069	0.523492	9.59e-11
CAALFM_C107910CA	CR_09330C_A		orf19.7328	0.52341	1.4e-09
CAALFM_C110950CA	C4_06180C_A		NA	0.523283	0.118741
CAALFM_C109390WA	C5_02640W_A		orf19.4280	0.521784	6.11e-08
CAALFM_CR04730WA	C1_00040W_A	CTA2	orf19.6112	0.521547	1.21e-08
CAALFM_C502990WA	C5_04560C_A	CUP1	orf19.3940.1	0.521476	3.8e-05
CAALFM_CR04820WA	C3_02890C_A		orf19.280	0.521302	0.771183
CAALFM_C503360WA	C4_05580C_A		orf19.1239	0.521302	0.771183
CAALFM_C402640CA	C1_14210C_A	IML2	orf19.7229	0.520313	5.12e-09
CAALFM_C209900CA	CR_08670C_A		orf19.6443	0.519544	0.00285224
CAALFM_C104020CA	C2_09010W_A	STB3	orf19.203	0.519536	8.81e-08
CAALFM_CR02710WA	C1_05700W_A	AUT7	orf19.2480.1	0.519471	3.81e-05
CAALFM_CR02720CA	C3_02250C_A		orf19.1620	0.519122	0.163621
CAALFM_C700950WA	C1_09220W_A		orf19.4780	0.519117	4.32e-09
CAALFM_CR08510WA	CR_00620C_A	ARG1	orf19.7469	0.518281	0.568718
CAALFM_C500420CA	C5_05240C_A		orf19.4017	0.517614	0.160185
CAALFM_CR05450CA	C2_06680W_A	FRP3	orf19.1224	0.517467	2.86e-09
CAALFM_C202710CA	C1_03400W_A		orf19.3041	0.51607	0.000400062
CAALFM_C201590WA	C4_02150C_A		orf19.4577	0.514686	0.0273992
CAALFM_C703210WA	C1_14190C_A		orf19.7227	0.514078	0.00527839
CAALFM_C102890CA	C3_05130C_A	THI4	orf19.5986	0.514034	0.105238
CAALFM_CR07270CA	C4_06620C_A		orf19.2870	0.514014	0.535329
CAALFM_C602740WA	C4_02110W_A		orf19.4580	0.513981	2.05e-07
CAALFM_C107960WA	C4_03600C_A		orf19.1314	0.51354	6.57e-07
CAALFM_C205450CA	C7_02070W_A	GRX1	orf19.6510	0.51254	0.228819
CAALFM_CR02890CA	C4_01800W_A		orf19.4612	0.511953	0.000175429
CAALFM_C208210CA	C6_02790C_A		orf19.5552	0.511185	4.53e-05
CAALFM_C112820CA	CR_07830C_A		orf19.3712	0.508857	3.9e-06
CAALFM_C207190CA	CR_07110C_A		orf19.8	0.508193	8.66e-05
CAALFM_C303710WA	C4_06260W_A	PGA43	orf19.2910	0.507968	0.000999372
CAALFM_C302610CA	C2_08610W_A	ERG9	orf19.3616	0.507915	6.59e-08
CAALFM_C402320CA	C1_03120W_A		orf19.3004	0.506212	7.15e-09
CAALFM_C701600WA	CR_09150W_A		orf19.7311	0.504463	0.0160962
CAALFM_CR07050CA	C6_03230W_A	ARG3	orf19.5610	0.503886	0.412979
CAALFM_C302500WA	C2_06070W_A	FAA2-1	orf19.4114	0.503383	6.27e-05
CAALFM_C503410CA	C6_01020W_A		orf19.104	0.502753	0.0342016
CAALFM_C111160CA	C6_00460C_A	FET3	orf19.4213	0.50183	1.78e-05
CAALFM_C102640CA	C1_01830C_A	UBC8	orf19.4540	0.499703	6.27e-06
CAALFM_C101160CA	C7_01320W_A		orf19.6912	0.499091	6.77e-08
CAALFM_C200030WA	C2_07060W_A		orf19.2261	0.498355	2.83e-06
CAALFM_CR05180CA	CR_10860C_A	CTA26	orf19.7680	0.498313	1.33e-08
CAALFM_C108960WA	CR_07560W_A	RGD3	orf19.729.1	0.497977	7.77e-07
CAALFM_C203040WA	C5_00670C_A	HMS1	orf19.921	0.497589	0.00616508
CAALFM_C114090WA	C1_08800W_A		orf19.4738	0.497362	6.36e-10
CAALFM_C403140CA	C5_03590W_A	LAP4	orf19.6671	0.496674	2.65e-06
CAALFM_C210490CA	C1_09160W_A	AOX1	orf19.4774	0.495745	0.0111991
CAALFM_C400710WA	C3_01940C_A		orf19.1654	0.493691	8.13e-07
CAALFM_C405830WA	C1_08340C_A		orf19.5114	0.493343	1.79e-05
CAALFM_C403410WA	C6_03800C_A		orf19.5754	0.491871	6.33e-08
CAALFM_C206480WA	C4_05940W_A	PPS1	orf19.4405	0.491428	0.000657753
CAALFM_C203130WA	C5_04320C_A		orf19.3919	0.491378	1.29e-09
CAALFM_CR07080WA	C4_03200C_A		orf19.2670	0.49079	5.93e-08
CAALFM_C503600WA	C7_01650W_A		orf19.6559	0.490365	4.38e-11
CAALFM_C104370CA	C4_01690C_A	HRT2	orf19.4624	0.490094	2.98e-09
CAALFM_C202250CA	CR_06270W_A		orf19.3879.1,	0.490076	0.00939625
CAALFM_C503730WA	CR_08430W_A		orf19.6411	0.490071	3.05e-09
CAALFM_CR03500WA	CR_02300C_A		orf19.3737	0.489113	2.81e-09
CAALFM_CR03010CA	C3_02910W_A		orf19.284	0.48835	0.490747
CAALFM_C102350WA	C4_02340W_A		orf19.2769	0.488146	7.1e-06
CAALFM_C301970CA	C1_13270W_A		orf19.4953	0.488126	2.34e-05
CAALFM_C700560CA	C7_02600C_A		orf19.2371;	0.488024	8.07e-07
CAALFM_C306900WA	C1_10340W_A		orf19.4905	0.488021	0.00426474
CAALFM_C108920WA	CR_08860W_A	PDK2	orf19.7281	0.487309	9.89e-08
CAALFM_C301910CA	C2_01270W_A	CHA1	orf19.1996	0.48639	0.000273543
CAALFM_C300660WA	C7_04280C_A		orf19.7140	0.485742	5.69e-09
CAALFM_C113370WA	C2_07210C_A	TPK2	orf19.2277	0.48569	7.08e-09
CAALFM_C601980CA	CR_05880W_A		orf19.6626	0.484776	2.83e-06
CAALFM_C103300CA	C5_00010W_A	TLO11	orf19.5700	0.484603	3.33e-05
CAALFM_C505180WA	C7_01940C_A		orf19.6527	0.484506	3.23e-07
CAALFM_C703000CA	CR_07190W_A		orf19.730	0.484077	1.62e-06
CAALFM_C504530WA	C1_10180C_A	ECM21	orf19.4887	0.483805	0.000217548
CAALFM_C505430WA	C2_00630C_A		orf19.2065	0.483595	2.62e-06
CAALFM_CR05580CA	C2_07770C_A		orf19.2203.1	0.48357	0.0756398
CAALFM_C101090CA	C5_05050W_A	ADH1	orf19.3997	0.483351	4.54e-13
CAALFM_C701210CA	C5_05360C_A		orf19.4031	0.48093	5.4e-08
CAALFM_C600150WA	C2_03690C_A		orf19.851	0.480512	0.0114266
CAALFM_C702480WA	CR_05800C_A		orf19.6630	0.480366	5.23e-06
CAALFM_C105330CA	C4_06640C_A		orf19.2868	0.480342	0.78289
CAALFM_C205830CA	C2_02390W_A		orf19.1562	0.479147	6.42e-05
CAALFM_C600930CA	C2_08380C_A		orf19.1434	0.478984	2.45e-06
CAALFM_C407060WA	C1_00090W_A		orf19.6103	0.478844	0.000105996
CAALFM_C301440CA	C5_02560C_A		orf19.4269	0.478697	5.69e-09
CAALFM_CR07200WA	C1_07450W_A		NA	0.478378	0.0088862
CAALFM_C300250CA	C2_04310W_A	ERG10	orf19.1591	0.478044	4.26e-09
CAALFM_C103940WA	C4_04790W_A	FAV1	orf19.3801	0.477161	0.0429253
CAALFM_C603140CA	C3_07080W_A	RRD1	orf19.6792	0.476993	7.97e-07
CAALFM_C210810WA	C1_07430W_A	PHO100	orf19.4424	0.476552	0.473723
CAALFM_C104300CA	C3_04020C_A	ZCF16	orf19.2808	0.476135	2.91e-05
CAALFM_C105710CA	C1_12220W_A	CDC6	orf19.5242	0.475344	3.81e-06
CAALFM_C207800WA	C6_00160W_A	PGA48	orf19.6321	0.475235	9.27e-07
CAALFM_C403840CA	C4_00170W_A		orf19.5642	0.475047	4.88e-11
CAALFM_C204820WA	C2_07720C_A		orf19.2210	0.475001	6.64e-12
CAALFM_CR03290CA	C2_00690W_A		orf19.2059	0.474213	0.0274073
CAALFM_CR02700WA	C2_06990W_A		orf19.2253	0.472832	0.104905
CAALFM_C101680CA	CR_06290C_A		orf19.3881	0.472769	9.51e-07
CAALFM_C402140CA	C2_10330C_A		orf19.1745	0.471988	0.022467
CAALFM_C208330WA	C1_11630C_A	FUS1	orf19.1156	0.471854	0.427028
CAALFM_C501840CA	C2_04920W_A	ARH2	NA	0.471042	0.554626
CAALFM_CR02000CA	C1_11280W_A		orf19.674	0.470987	6.42e-07
CAALFM_C502820CA	C2_02530W_A		orf19.1577	0.469355	0.632581
CAALFM_C106100CA	C2_07620W_A		orf19.1863	0.469198	0.508722
CAALFM_C104710CA	C7_03260C_A		orf19.5129	0.468668	9.99e-05
CAALFM_CR00250WA	C5_05300W_A	RIB5	orf19.4024	0.468537	9.23e-10
CAALFM_C110470WA	C1_00790W_A		orf19.6027	0.466445	0.000392363
CAALFM_C207550WA	C6_03360C_A		orf19.5625	0.464594	0.0269152
CAALFM_C402720CA	CR_04630C_A	DIT2	orf19.554	0.463697	0.000278663
CAALFM_C501430CA	C1_04270C_A		orf19.1062	0.46366	0.256634
CAALFM_C406410WA	C4_05730W_A		orf19.1258	0.462509	0.00353575
CAALFM_C209570CA	C5_00140C_A		orf19.5683	0.462073	0.0111756
CAALFM_CR00900WA	C5_01500C_A	ZCF20	orf19.4145	0.46182	2.36e-07
CAALFM_C303420CA	C6_03340C_A	GLC3	orf19.5622	0.460793	7.43e-10
CAALFM_C301850WA	C5_01420W_A		orf19.4132	0.460503	0.00160445
CAALFM_C502740WA	C1_05030C_A	PSF2	orf19.57	0.459597	0.00029782
CAALFM_C505010WA	CR_04660C_A	UGP1	orf19.1738	0.459242	3.83e-08
CAALFM_C112750CA	C6_00990W_A	RIM9	orf19.101	0.45872	0.000787566
CAALFM_C501700WA	C3_03800W_A	PTR22	orf19.6937	0.457687	2.26e-05
CAALFM_CR05150WA	C1_05350W_A	YPT53	orf19.430	0.456594	0.00134347
CAALFM_C100980WA	C3_05760W_A		orf19.7357	0.454711	1.24e-08
CAALFM_C503640WA	CR_08790W_A		NA	0.453518	0.00191032
CAALFM_C301350CA	C4_06480C_A	CEK1	orf19.2886	0.453482	4.66e-09
CAALFM_C302190CA	CR_04760C_A		orf19.6316	0.453268	1.09e-05
CAALFM_C404550CA	C2_04090W_A		orf19.812	0.452108	0.343451
CAALFM_C602350CA	C1_13450W_A	HYR1	orf19.4975	0.451367	3.02e-07
CAALFM_C108970WA	C3_05250C_A		orf19.6003	0.450836	7.83e-08
CAALFM_C701360CA	C4_05200C_A		orf19.6859	0.450602	0.513824
CAALFM_C307550CA	CR_05770W_A		orf19.6635	0.4501	0.00125816
CAALFM_C112570CA	C2_04880C_A	ARH2	orf19.3521	0.449301	1.24e-06
CAALFM_C700390WA	C5_02220C_A		orf19.4229	0.449026	0.00182679
CAALFM_C602830WA	C1_02820W_A	LYS2	orf19.2970	0.448535	5.28e-06
CAALFM_C503920CA	C4_02020W_A	CAT2	orf19.4591	0.448183	2.21e-08
CAALFM_C502010CA	C1_14020W_A		orf19.7209	0.447975	0.560173
CAALFM_C603120WA	C2_10870W_A		orf19.5370	0.447582	5.85e-07
CAALFM_C500570WA	C1_11950W_A		orf19.5270	0.447316	0.0449929
CAALFM_CR00330CA	C1_08500C_A	ENO1	orf19.395	0.446906	2.07e-09
CAALFM_CR00810WA	CR_02670C_A		orf19.2826	0.445943	1.22e-06
CAALFM_C505280CA	C1_04740W_A	LPG20	orf19.771	0.445883	0.00342039
CAALFM_C205970CA	C2_03270W_A	GPM1	orf19.903	0.445771	1.05e-12
CAALFM_CR03200CA	CR_00290W_A		orf19.7504	0.444939	0.00177461
CAALFM_CR06840WA	C1_06520C_A	BPH1	orf19.6261	0.443971	3.76e-06
CAALFM_C604180WA	CR_03000C_A		orf19.2863	0.443179	6.54e-05
CAALFM_C114390WA	C2_08240W_A		orf19.2219	0.442877	1.44e-09
CAALFM_CR04580WA	C4_01750C_A	FBA1	orf19.4618	0.442838	4.03e-07
CAALFM_C201010WA	C1_10510W_A		orf19.994	0.442495	0.00110984
CAALFM_CR08940WA	C7_01730C_A	STE18	orf19.6551.1	0.442299	0.109915
CAALFM_C400820WA	C1_01270W_A	CTA9	orf19.3315	0.441529	8.19e-05
CAALFM_C400540CA	C7_03140W_A		orf19.5141	0.441265	0.010444
CAALFM_C202420CA	C1_12260W_A	VPH2	orf19.5237	0.441195	0.00222797
CAALFM_C703120WA	C6_00290W_A		orf19.1189	0.440788	1.37e-08
CAALFM_CR07670WA	C1_06830W_A		NA	0.440121	0.359669
CAALFM_C200820WA	C7_02750W_A	NA	orf19.5191	0.438494	0.000307075
CAALFM_C500820WA	C1_13680C_A	GCV3	orf19.5006	0.438463	2.84e-06
CAALFM_C109620CA	CR_03780C_A		orf19.4376	0.438253	0.000712936
CAALFM_C503250WA	C3_05980C_A	FAA2	orf19.7379	0.438012	0.0227716
CAALFM_C403780CA	CR_02780W_A		orf19.2836	0.437947	0.18526
CAALFM_C102690CA	C3_01020W_A		orf19.2506	0.437002	1.03e-09
CAALFM_C405020WA	C7_00660W_A	GAC1	orf19.7053	0.436855	2.11e-05
CAALFM_C402770CA	C1_04460C_A		orf19.6838	0.436223	0.0446997
CAALFM_C202270CA	C7_02220C_A		orf19.6492	0.435478	0.00188491
CAALFM_CR08760CA	C2_08690C_A		orf19.3607	0.435435	0.00220003
CAALFM_CR09790WA	C3_05330C_A		orf19.6970	0.435245	0.0119796
CAALFM_C500320WA	C3_03480C_A	ALT1	orf19.346	0.434221	1.69e-05
CAALFM_C405820WA	C3_04270C_A	CTP1	orf19.5870	0.43365	1.14e-06
CAALFM_C208530CA	C1_11510C_A		orf19.1169	0.433284	0.000328667
CAALFM_C302640CA	C1_12730W_A	RVS162	orf19.6349	0.432799	3.51e-06
CAALFM_C300840CA	C7_04160W_A		orf19.7158	0.432774	0.020363
CAALFM_C701050WA	C7_00740W_A	RIM15	orf19.7044	0.432029	3.15e-08
CAALFM_C303570CA	C5_00650C_A	THR1	orf19.923	0.431626	0.00134756
CAALFM_C103840WA	C2_03670W_A	SAP99	orf19.853	0.431599	0.18325
CAALFM_C101580WA	C1_09770W_A		orf19.4842	0.431563	0.0160349
CAALFM_C104970WA	CR_06250W_A		orf19.3877	0.431523	0.000427266
CAALFM_C704150WA	C2_02410W_A		orf19.1564	0.431266	4.39e-09
CAALFM_C108520CA	C1_13950C_A		orf19.5033	0.431226	0.0292888
CAALFM_C105210CA	C3_07360W_A	DLD2	orf19.6755	0.430972	1.18e-07
CAALFM_C201620WA	CR_04640W_A	DIT1	orf19.1741	0.430955	0.00114856
CAALFM_C103800WA	C1_04660W_A	DUR1,2	orf19.780	0.42925	0.0172414
CAALFM_C503800WA	C2_09280C_A		orf19.4090	0.428725	0.000283913
CAALFM_CR08180CA	C1_07650W_A		orf19.2779	0.42791	0.000135429
CAALFM_C301480CA	C2_09730C_A	IPK2	orf19.1377	0.427883	7.4e-05
CAALFM_CR08020CA	C7_02610C_A		orf19.2372;	0.427634	0.000417644
CAALFM_CR00670CA	C1_02060W_A		orf19.3663.1	0.425602	3.45e-05
CAALFM_CR02330CA	C4_01970W_A		orf19.4595	0.42529	0.000126999
CAALFM_C306230WA	CR_06010W_A		orf19.3848	0.425158	2.07e-05
CAALFM_C400870WA	C3_07730W_A	WOR4	orf19.6713	0.42455	5.07e-05
CAALFM_CR07390CA	C4_00430W_A	MEP2	orf19.5672	0.424319	1e-06
CAALFM_C502860CA	C7_02650W_A	TEP1	orf19.3699	0.423795	0.0136978
CAALFM_C201160WA	C1_12970C_A	SEC2	orf19.4928	0.423678	1.58e-07
CAALFM_C602520WA	C1_10780C_A	HNT1	orf19.2341	0.423165	0.000364492
CAALFM_C701350CA	C6_03590C_A		orf19.5727	0.422684	0.00289105
CAALFM_C307650CA	C6_01280W_A	EXO84	orf19.135	0.422666	4.35e-08
CAALFM_CR06680CA	C1_02170C_A	GAL102	orf19.3673;	0.422551	0.0112502
CAALFM_C305860CA	C6_04570W_A	NAG6	orf19.2151	0.422488	4.83e-10
CAALFM_C303680WA	CR_02910W_A		orf19.2848	0.422378	1.24e-07
CAALFM_CR01370CA	C6_00330C_A	GNP1	orf19.1193	0.421825	2.77e-05
CAALFM_C604260CA	C5_03960W_A		orf19.3215	0.421576	1.55e-09
CAALFM_C104600CA	C2_03760C_A		orf19.846	0.421001	2.22e-05
CAALFM_C700280WA	C1_13610C_A	KIS2	orf19.4997	0.420866	0.000963612
CAALFM_C500030WA	C6_02710C_A	SAP6	orf19.5542	0.420758	0.215908
CAALFM_C103830CA	C3_05090C_A		orf19.5980	0.420436	0.000412115
CAALFM_C501800CA	C7_01800C_A	PFK2	orf19.6540	0.419734	0.000260492
CAALFM_CR08140WA	CR_07800W_A	SAP2	orf19.3708	0.419729	0.0423396
CAALFM_C201290CA	C3_02340W_A		orf19.1610	0.419677	0.00649795
CAALFM_C505000CA	C2_01630W_A		orf19.1473	0.41944	5.39e-05
CAALFM_C104640WA	CR_03890W_A	WOR3	orf19.467	0.41923	0.00388295
CAALFM_C103370WA	C4_00840W_A		orf19.4711	0.418704	4.92e-08
CAALFM_C210340WA	C2_03140C_A		orf19.5782	0.417907	4.92e-08
CAALFM_C205000CA	C2_10600W_A		orf19.5339	0.417748	0.00708375
CAALFM_C602460CA	C2_07480W_A	LPT1	orf19.1881	0.417347	1.56e-08
CAALFM_C501580CA	CR_09040W_A		orf19.7300	0.417235	0.0192109
CAALFM_C500890CA	C1_01750W_A		orf19.4550	0.417171	0.000128057
CAALFM_CR08580CA	CR_07770C_A	PTC6	orf19.3705	0.41709	8.2e-05
CAALFM_C209490WA	C2_09150W_A	MIT1	orf19.4077	0.416685	2.09e-09
CAALFM_C100700WA	C1_12840W_A		orf19.4914	0.416297	0.00805506
CAALFM_C106800WA	C2_07260C_A	DQD1	orf19.2283	0.41523	7.07e-09
CAALFM_C200290WA	C7_03420C_A	SNG3	orf19.1333	0.415078	7.63e-06
CAALFM_C403040WA	C4_03990C_A		orf19.1208	0.414943	0.000324344
CAALFM_C400490WA	C1_12870C_A		orf19.4917	0.414345	0.0146482
CAALFM_C113720WA	C4_04010W_A		orf19.5311	0.414339	0.000468968
CAALFM_C301060WA	C7_00260C_A		orf19.7096	0.413186	2.23e-07
CAALFM_C203170WA	C2_07400C_A	APR1	orf19.1891	0.41318	0.00303508
CAALFM_C402870CA	C1_10040W_A	ERO1	orf19.4871	0.412522	5.75e-08
CAALFM_C400660WA	C2_07250C_A		orf19.2282	0.411974	0.0928006
CAALFM_C503290CA	CR_10250C_A	FDH3	orf19.7600	0.411558	0.000343556
CAALFM_C106440CA	C3_07370W_A		orf19.6754	0.411301	0.00025352
CAALFM_C108210CA	C2_05260W_A	BUD14	orf19.3555	0.410969	1.22e-08
CAALFM_CR02170WA	CR_06470W_A		orf19.719	0.410791	6.18e-08
CAALFM_C302630CA	C2_00940W_A		orf19.2030	0.410621	0.0089544
CAALFM_C702930CA	C3_00430W_A	EST3	orf19.5423	0.409421	0.0388968
CAALFM_CR00080WA	C1_05670W_A		orf19.2484	0.409207	2.35e-08
CAALFM_C301710CA	C3_03410C_A		orf19.338	0.408539	4.3e-06
CAALFM_CR02950CA	C7_03030W_A		orf19.5158;	0.408437	0.000921296
CAALFM_C306240CA	CR_09850C_A	FGR46	orf19.7557	0.408322	0.256738
CAALFM_C402200CA	C6_01670W_A	MAE1	orf19.3419	0.407518	0.0255415
CAALFM_C602250WA	C2_07140W_A		orf19.2269	0.407369	5.9e-09
CAALFM_C100340WA	CR_06170W_A		orf19.3872	0.407347	1.59e-07
CAALFM_C500530WA	C7_04270C_A	UFE1	orf19.7141	0.406999	2.05e-06
CAALFM_C205920CA	C2_03600W_A	BMT8	orf19.860	0.406759	0.00434656
CAALFM_C204350CA	C5_05500C_A	CTA24	orf19.4054	0.406018	4.98e-06
CAALFM_C600880WA	C1_07840W_A		orf19.5054	0.405867	4.1e-06
CAALFM_C300880WA	C5_00050W_A		orf19.5694	0.404887	0.000265832
CAALFM_CR08100CA	C5_00800C_A		orf19.583	0.40482	7.32e-09
CAALFM_C405370WA	C4_02300W_A	HOS3	orf19.2772	0.404517	3.42e-06
CAALFM_CR08750CA	C2_03260W_A		orf19.904	0.40415	0.000164753
CAALFM_C201580WA	C1_09270W_A	FGR43	orf19.4786	0.403808	0.00414811
CAALFM_CR05610CA	C1_02220C_A		orf19.3679	0.403667	0.000320763
CAALFM_C114000CA	C2_05550W_A		orf19.6867	0.403486	1.01e-07
CAALFM_C204810WA	CR_02460W_A		orf19.3720	0.403451	7.33e-05
CAALFM_C204700CA	CR_04490C_A		orf19.540	0.402726	0.000708945
CAALFM_C208340CA	CR_04290W_A	HAP31	orf19.517	0.402685	0.00124591
CAALFM_C302460CA	C1_11470C_A	DPP1	orf19.656	0.402615	0.00456363
CAALFM_C203000CA	C3_00550C_A	HRK1	orf19.5408	0.401846	6.94e-06
CAALFM_CR08660WA	C2_10070W_A		orf19.1774	0.401604	0.177955
CAALFM_C104950CA	CR_05760C_A		orf19.6636	0.401429	0.0023604
CAALFM_C202820CA	C3_06870W_A	TDH3	orf19.6814	0.401155	6e-09
CAALFM_C503450WA	C3_00010C_A		orf19.5474	0.40099	1.18e-05
CAALFM_C105360CA	C1_09990W_A	SAC1	orf19.4865	0.400698	8.06e-05
CAALFM_C701890CA	C7_00400W_A	LEU2	orf19.7080	0.400371	1.95e-05
CAALFM_C109320CA	C4_05000W_A		orf19.3780	0.399974	0.00405266
CAALFM_C407170CA	C3_00030C_A		orf19.5472;	0.3996	6.62e-05
CAALFM_C107180WA	C7_03340C_A	PRR2	orf19.1341	0.39955	0.00315073
CAALFM_C203450WA	CR_00040C_A		orf19.7539.1	0.399521	2.41e-05
CAALFM_CR04200WA	C1_10820C_A		orf19.2335	0.398442	3.59e-05
CAALFM_C501050CA	C3_02140C_A		orf19.1632	0.398216	6.02e-05
CAALFM_C205520WA	C5_02810W_A		orf19.4305.1	0.398044	0.0138061
CAALFM_C105890WA	CR_02640W_A	RFG1	orf19.2823	0.397566	5.9e-07
CAALFM_C105190CA	C7_04340C_A		orf19.7127.1	0.397452	0.00279406
CAALFM_C302840WA	C1_10890C_A		orf19.2328	0.396768	1.64e-05
CAALFM_C100470CA	C6_02420W_A		orf19.3483	0.396621	0.0179668
CAALFM_C703270WA	CR_09440C_A		orf19.7341	0.396487	0.00010494
CAALFM_C101600WA	C4_00600C_A	MUC1	orf19.4183	0.396248	6.29e-08
CAALFM_C307470WA	C1_05830W_A		orf19.2468	0.396135	0.803584
CAALFM_C109570WA	C1_06430C_A		orf19.6267	0.396135	0.803584
CAALFM_C105490CA	C1_05120W_A		orf19.4059	0.395863	0.000113526
CAALFM_C203940CA	C1_05170C_A	CUE5	orf19.448	0.39558	5.4e-08
CAALFM_C106880CA	C1_10840C_A		orf19.2333	0.395478	0.00358233
CAALFM_C205490WA	CR_04280C_A		orf19.516	0.394951	9.27e-05
CAALFM_C104330WA	C2_08640C_A	PST2	orf19.3612	0.394777	0.016759
CAALFM_C401110WA	C6_02000W_A	PLB2	orf19.690	0.394765	0.0407132
CAALFM_C704070CA	C3_00260C_A	BNA4	orf19.5443	0.394317	0.00320779
CAALFM_C102080WA	C2_10570W_A	SGS1	orf19.5335	0.393926	9.75e-05
CAALFM_C305910WA	CR_03630W_A	IFF3	orf19.4361	0.393638	4.48e-05
CAALFM_C500690CA	C3_06880W_A		orf19.6813	0.393256	0.0316019
CAALFM_C210110WA	C1_07100C_A		orf19.6194	0.393231	0.0179962
CAALFM_C701250WA	C1_07250C_A	ALG9	orf19.4442	0.393194	9.48e-06
CAALFM_C404700WA	C2_04470W_A	ADH3	orf19.4505	0.392934	0.107725
CAALFM_C502280CA	C7_02850W_A		orf19.5177	0.392614	0.000169736
CAALFM_CR07760WA	C6_03310W_A		orf19.5619	0.392215	4.79e-06
CAALFM_C502070CA	C3_02920W_A		orf19.285	0.391944	3.48e-06
CAALFM_C205930WA	C4_04250W_A		orf19.1424	0.391389	0.000126067
CAALFM_C602910WA	C4_06280C_A		orf19.2908	0.391366	0.0111649
CAALFM_C302030WA	CR_08290W_A		orf19.6393	0.390969	5.6e-05
CAALFM_C103650CA	C2_03010C_A	RNR21	orf19.5801	0.390926	2.54e-08
CAALFM_C407100CA	C4_02940W_A	ABP1	orf19.2699	0.390794	1.53e-09
CAALFM_CR10460WA	C5_03140C_A		orf19.4346	0.390679	3.81e-06
CAALFM_C601710CA	C3_02170C_A	LAP41	orf19.1628	0.39058	8.14e-09
CAALFM_C200810CA	C5_02390C_A		orf19.4247	0.390138	9.59e-06
CAALFM_CR01650WA	C2_10300C_A		orf19.1748	0.389871	0.0931058
CAALFM_C207920WA	C1_00210C_A		orf19.6082	0.38932	8.66e-07
CAALFM_C603910CA	CR_06380C_A		orf19.727	0.388875	0.000128734
CAALFM_C401820CA	C1_02970W_A		orf19.2988	0.388778	1.01e-06
CAALFM_C400690CA	C1_00850W_A	IHD2	orf19.6021	0.388704	0.0007649
CAALFM_C502040WA	C3_04870W_A		orf19.5954	0.388422	0.67097
CAALFM_C301450CA	C2_03030W_A	LIG4	orf19.5798	0.38794	5.55e-05
CAALFM_C406540WA	C1_14550C_A		orf19.7272	0.387444	0.00011643
CAALFM_CR02030CA	C1_10570C_A		orf19.1005	0.387367	0.537772
CAALFM_C400640WA	C3_03370C_A		orf19.334	0.387263	1.13e-05
CAALFM_C209920WA	C1_07670W_A	ZCF4	orf19.1227	0.386497	0.389917
CAALFM_C405310WA	C1_01760W_A	FGR38	orf19.4549	0.386444	1.87e-05
CAALFM_CR00570WA	C2_07220W_A		orf19.2278	0.386163	8.63e-08
CAALFM_C302670WA	C2_04670W_A		orf19.149	0.385949	0.124619
CAALFM_C402090CA	C2_04320W_A		orf19.1590	0.385282	0.00133495
CAALFM_C108000WA	C5_02850W_A	HSL1	NA	0.384965	3.66e-08
CAALFM_C701970CA	C2_04750W_A		orf19.192	0.384893	0.00168697
CAALFM_C301170WA	C2_04720C_A	FGR51	orf19.156	0.383981	3.06e-05
CAALFM_C101530CA	CR_07130C_A	ALK8	orf19.10	0.383511	0.346043
CAALFM_C113110CA	C2_10420W_A	FGR6-4	orf19.3490	0.383166	0.00296693
CAALFM_C205100CA	C4_03480C_A		orf19.3375	0.38307	0.59978
CAALFM_C105270CA	CR_02440W_A		orf19.3721	0.383054	0.117035
CAALFM_C600550WA	C1_03510C_A		orf19.3053	0.382905	1.92e-06
CAALFM_C107630WA	C6_04620C_A	NAG4	orf19.2160	0.382623	0.698448
CAALFM_C208070CA	C1_14360C_A	WSC4	orf19.7251	0.382295	3.99e-07
CAALFM_C701880CA	C4_05680W_A	PHO4	orf19.1253	0.382253	5.17e-06
CAALFM_CR00490WA	C1_07540C_A	BBC1	orf19.2791	0.382016	1.49e-06
CAALFM_C303070WA	C2_05950C_A	TES15	orf19.5215	0.381932	0.0239276
CAALFM_CR04140WA	C4_04670C_A		orf19.3813	0.381728	0.000310468
CAALFM_C112340CA	C7_03020C_A	DUG3	orf19.5159	0.380374	0.000364392
CAALFM_CR07180WA	C1_08490W_A		orf19.394	0.380109	3.08e-05
CAALFM_CR02550CA	C1_07770W_A	NA	orf19.4712	0.379923	0.00737948
CAALFM_CR06760CA	C7_01100C_A		orf19.6896	0.379714	0.0005593
CAALFM_C504900CA	C3_02150C_A	ERG6	orf19.1631	0.379432	0.0046266
CAALFM_C406430CA	C7_00460W_A		orf19.7073	0.379419	0.0761688
CAALFM_C100720WA	C3_07970C_A	TLO8	orf19.6191	0.379271	3.03e-05
CAALFM_CR01580CA	C1_07480C_A		orf19.2797	0.378963	0.365524
CAALFM_C401670CA	C1_08330C_A	ADH2	orf19.5113	0.378822	4.97e-05
CAALFM_C303250WA	C5_00230C_A		orf19.972	0.378469	0.0210184
CAALFM_C701690WA	C3_00060W_A	TLO7	orf19.5467	0.378321	0.00626454
CAALFM_CR10280WA	C4_05530W_A	FGR6-10	orf19.1234	0.377979	0.000646649
CAALFM_C305920WA	C1_12010C_A	KIP4	orf19.5265	0.376828	1.64e-07
CAALFM_CR04780WA	CR_04190W_A	SRV2	orf19.505	0.376636	1.29e-05
CAALFM_C300340WA	C3_00490W_A	ESA1	orf19.5416	0.375524	5.53e-06
CAALFM_C101870CA	C5_01200W_A		orf19.1950	0.375374	0.026868
CAALFM_C305440CA	C3_05400C_A		orf19.6978	0.37505	0.0166926
CAALFM_C501640WA	CR_06260W_A		orf19.3878	0.374461	0.00109184
CAALFM_CR00430CA	C7_00920C_A		orf19.7022	0.37445	0.000208124
CAALFM_C701570CA	CR_05920C_A	MHP1	orf19.6621	0.373792	4.25e-05
CAALFM_C305380WA	C1_13810W_A		orf19.5019	0.37357	3.72e-07
CAALFM_C201050WA	C4_03810W_A		orf19.1297	0.373194	3.17e-05
CAALFM_C305070WA	C1_05520W_A		orf19.413	0.373026	0.00848893
CAALFM_C102660CA	C1_13480W_A	HSP70	orf19.4980	0.371938	0.228763
CAALFM_CR01700CA	C2_01990C_A	FAB1	orf19.1513	0.37133	2.5e-06
CAALFM_C500160WA	C7_00030W_A		orf19.7123	0.371212	2.81e-06
CAALFM_C105880WA	C5_04960W_A		orf19.3984	0.371069	0.00614829
CAALFM_C602670CA	C5_00380W_A		orf19.952	0.371039	0.00197826
CAALFM_C204860WA	C2_05560W_A		orf19.6868	0.370957	0.00367913
CAALFM_C403400WA	CR_07840C_A		orf19.3713	0.370948	0.0107654
CAALFM_C209310CA	C5_00170W_A		orf19.5680	0.370835	4.51e-05
CAALFM_C301760WA	C6_02300C_A		orf19.3471	0.370355	0.00691458
CAALFM_C106070WA	C2_02930C_A		orf19.5812	0.370132	2.48e-08
CAALFM_C305800WA	CR_10210W_A	PGA12	orf19.7597	0.369857	0.802613
CAALFM_C500920WA	C1_05770C_A	PRC3	orf19.2474	0.369763	0.000809286
CAALFM_C111050WA	C4_04080C_A	PGA31	orf19.5302	0.369735	0.559606
CAALFM_C106790CA	C4_05770C_A	CFL1	orf19.1263	0.368232	0.00251108
CAALFM_C505490CA	C1_06780W_A	NPR1	orf19.6232	0.368202	4.73e-06
CAALFM_C302180CA	CR_09160C_A	ERG13	orf19.7312	0.368145	0.0117968
CAALFM_C200700WA	C3_04450C_A		orf19.5896	0.368131	0.596002
CAALFM_C101450WA	C5_05040W_A		orf19.3996	0.367777	0.00297241
CAALFM_CR07240CA	C2_08870C_A	PIR1	orf19.220	0.367428	0.011752
CAALFM_C110730WA	C2_09030W_A		orf19.202	0.36704	0.0228851
CAALFM_CR05380CA	C4_05340W_A		orf19.1792	0.367031	0.000239175
CAALFM_C500360CA	C7_02210W_A		orf19.6493	0.366823	0.487002
CAALFM_C401490WA	C1_00060W_A	TUP1	orf19.6109	0.366295	1.16e-05
CAALFM_C504970CA	C4_01300W_A		orf19.4657	0.36605	1.15e-05
CAALFM_C604240WA	C6_02030C_A		orf19.3508	0.365904	2.83e-05
CAALFM_CR06210CA	C5_03880C_A		orf19.1106	0.36583	0.465422
CAALFM_C300950CA	C3_05640W_A		orf19.6999	0.365591	0.76368
CAALFM_C406800WA	C3_01280W_A		orf19.1723	0.365586	0.000115807
CAALFM_C109030CA	C7_02370W_A		orf19.6474	0.364563	0.000963618
CAALFM_C500350CA	C3_03440C_A		orf19.341	0.364522	0.0168496
CAALFM_C306100CA	C1_08180C_A		orf19.5095	0.364227	2.76e-07
CAALFM_CR03400WA	C3_00650W_A	NGT1	orf19.5392	0.363229	0.125596
CAALFM_C701750WA	C2_05280C_A	GPI19	orf19.3557	0.362813	0.0208388
CAALFM_C402740WA	C2_07230C_A	ZCF10	orf19.2280	0.36232	0.000118863
CAALFM_C503530CA	C4_00290C_A		orf19.5655	0.361694	0.374009
CAALFM_CR10270CA	CR_06500C_A		orf19.716	0.36159	0.00502175
CAALFM_CR01570WA	CR_03480W_A		orf19.4391	0.361081	0.265422
CAALFM_C307200CA	CR_09700W_A		orf19.6592	0.361001	0.0159073
CAALFM_CR05350WA	C7_01720W_A		orf19.6552	0.360199	1.47e-05
CAALFM_C113000WA	C2_08820C_A	SPO11	orf19.3589	0.360036	0.646727
CAALFM_C402220CA	C3_07760C_A		orf19.6709	0.359884	0.077745
CAALFM_C201430WA	C1_00890W_A		orf19.6016	0.359142	0.000692592
CAALFM_C103280WA	C1_02380C_A		orf19.2925	0.358666	0.0187652
CAALFM_CR04010CA	C2_01800W_A		orf19.1490.2,	0.358663	0.099008
CAALFM_C101150CA	C5_05060C_A		orf19.3998	0.357997	0.0788708
CAALFM_CR06960WA	C5_01260W_A		orf19.1943	0.357761	0.403737
CAALFM_C113410WA	C3_00180C_A	DAL1	orf19.5454	0.357484	0.0068045
CAALFM_C301240CA	C4_06310C_A	PGA41	orf19.2906	0.357363	0.138087
CAALFM_C110410WA	C6_01730W_A	FGR37	orf19.3413	0.357226	0.863641
CAALFM_C504840CA	C4_04380C_A		orf19.1409.2	0.356701	0.0010935
CAALFM_CR09660WA	C4_05380C_A		orf19.1795.1	0.355841	7.75e-05
CAALFM_C206660WA	C1_12270W_A	SRT1	orf19.5236	0.355146	0.0141833
CAALFM_C700550CA	C1_00420W_A		orf19.6065	0.354997	0.000204739
CAALFM_C206120CA	C4_03910W_A	FGR28	orf19.1596	0.354766	0.00137319
CAALFM_C102930CA	C7_00420C_A		orf19.7078	0.354699	0.00277694
CAALFM_C301080WA	C1_10090C_A		orf19.4878	0.354579	3.31e-05
CAALFM_CR03160WA	C4_06340W_A	AGO1	orf19.2903	0.354566	0.00039792
CAALFM_C303200CA	C4_00620C_A	SPC2	orf19.4181	0.353591	0.000201958
CAALFM_C502490CA	C1_02860C_A	YKT6	orf19.2974	0.35359	0.000167921
CAALFM_C304210WA	C2_08860W_A		orf19.223	0.353439	0.000142226
CAALFM_C603380WA	C2_01090C_A	ERG28	orf19.2016	0.353035	4.94e-05
CAALFM_C500280CA	C3_05510W_A		orf19.6986	0.352844	0.000581798
CAALFM_CR07020WA	C1_14440C_A	GDI1	orf19.7261	0.352558	2.43e-07
CAALFM_C209540WA	C2_00010W_A	TLO5	orf19.1925	0.352488	1.34e-05
CAALFM_C101320WA	C1_04560W_A		orf19.6850	0.35235	0.00347227
CAALFM_C306960CA	C3_05190C_A	MCA1	orf19.5995	0.351058	1.39e-06
CAALFM_C103770WA	C2_06570C_A		orf19.7550	0.350479	4.31e-08
CAALFM_CR01630CA	CR_03410W_A		orf19.2381	0.350399	0.000690956
CAALFM_C111560CA	C2_03440W_A	PGA33	orf19.876	0.350296	1.28e-05
CAALFM_CR10010CA	C2_09870W_A		orf19.1364	0.350067	6.37e-05
CAALFM_C603220WA	C4_04860W_A		orf19.3793	0.349788	0.00896042
CAALFM_C702190WA	CR_09190C_A		orf19.7316	0.349716	0.0017
CAALFM_CR01390WA	C1_09610W_A		orf19.4824	0.34959	4.21e-05
CAALFM_C201890WA	C3_07540C_A		orf19.6737	0.349505	3.74e-05
CAALFM_C101690CA	C3_01620W_A		orf19.1681	0.348873	0.0133075
CAALFM_C603740WA	C2_06100W_A	PMT4	orf19.4109	0.348616	2.02e-05
CAALFM_C604080WA	C1_06180W_A	TLO34	orf19.2662	0.348506	7.27e-05
CAALFM_C602960WA	C6_00250W_A		orf19.1183	0.347489	1.3e-05
CAALFM_C100240CA	C2_05460W_A	CDC19	orf19.3575	0.347163	0.000125396
CAALFM_C109080CA	C1_08730W_A		orf19.4731	0.346932	9.27e-05
CAALFM_C601860CA	C7_03680W_A		orf19.6703	0.346712	0.00746678
CAALFM_C406290WA	C6_03990C_A		orf19.5775	0.346047	0.000531441
CAALFM_C204200WA	CR_02190C_A	SEF1	orf19.3753	0.345845	3.22e-06
CAALFM_C200850WA	CR_09940W_A		orf19.7568	0.344481	0.568782
CAALFM_C207080CA	C2_08600W_A	GTR1	orf19.3617	0.3443	0.00217283
CAALFM_C301520CA	C7_03110W_A	PGA28	orf19.5144	0.344136	0.474567
CAALFM_C501820WA	C2_08950W_A		orf19.211	0.344117	0.0320679
CAALFM_C404520WA	CR_08300C_A		orf19.6396	0.343434	0.000144858
CAALFM_C503080CA	C4_07050W_A	YDC1	orf19.3104	0.342744	0.073802
CAALFM_CR02580WA	C6_02870W_A	RNH1	orf19.5564	0.342355	7.7e-06
CAALFM_C601120CA	C3_04480C_A	RAS2	orf19.5902	0.342054	0.139988
CAALFM_C209160WA	C5_00910C_A	TRX2	orf19.1976	0.341668	0.160264
CAALFM_C405360CA	C5_00970W_A		NA	0.341074	0.799008
CAALFM_C502540CA	C6_02570C_A	SEC20	orf19.5526	0.340843	0.00111034
CAALFM_C402630CA	C5_04870W_A		orf19.3973	0.340821	0.00308669
CAALFM_C400750CA	C6_04430W_A	CST5	orf19.2127	0.340686	0.0118138
CAALFM_CR08280WA	C4_06250C_A	SEC3	orf19.2911	0.340572	0.000173011
CAALFM_C107200WA	C2_06510W_A		orf19.27	0.340362	0.00449796
CAALFM_C404390WA	C1_04480C_A	TUS1	orf19.6842	0.340221	0.000250007
CAALFM_CR09110CA	C1_12650C_A		orf19.6358	0.340072	0.000150832
CAALFM_C112670CA	C7_00110W_A	SOD3	orf19.7111.1	0.34004	0.170725
CAALFM_C403520CA	C7_03730C_A		orf19.5504	0.3398	0.000111986
CAALFM_C203220CA	C4_01320C_A	OPT6	orf19.4655	0.33963	0.000192611
CAALFM_CR04340WA	C5_02720W_A	PEP12	orf19.4292	0.339202	0.00401509
CAALFM_C502020CA	CR_08000C_A		orf19.597	0.339153	5.38e-06
CAALFM_C203290WA	C6_02920C_A	VPS51	orf19.5568	0.338694	0.0112375
CAALFM_C601360WA	C3_07440W_A	TPI1	orf19.6745	0.338395	6.84e-06
CAALFM_C206200CA	C5_05440C_A		orf19.4043	0.337922	9.53e-06
CAALFM_C201960CA	C1_08950W_A	PFK26	orf19.4753	0.337603	2.84e-06
CAALFM_C407130WA	C6_02580W_A		orf19.5527	0.336805	0.000699352
CAALFM_C701010WA	CR_10340W_A	PTP3	orf19.7610	0.336397	0.00362207
CAALFM_C306830CA	C1_01460W_A		orf19.3332	0.335592	0.000115958
CAALFM_C207030CA	CR_07780W_A		orf19.3706	0.335531	0.0206299
CAALFM_C401000CA	C1_02810W_A	RAD16	orf19.2969	0.335312	9.79e-05
CAALFM_C500900CA	C7_04320W_A		orf19.7130	0.335254	0.1069
CAALFM_C603720WA	C3_02770C_A		orf19.268	0.334882	0.00369568
CAALFM_C112240CA	C1_11120C_A		orf19.2304	0.334823	2.77e-05
CAALFM_C209550CA	CR_03220C_A		orf19.2401	0.33479	0.0122733
CAALFM_C306720WA	C4_06470W_A		orf19.2887	0.334772	0.000576922
CAALFM_C604250WA	C3_02550C_A	DCG1	orf19.244	0.33462	0.00549541
CAALFM_C302270WA	C2_08800C_A	APE3	orf19.3591	0.334612	5.52e-05
CAALFM_C206350CA	C4_06040W_A		orf19.4414	0.334608	0.0312515
CAALFM_C403610CA	C6_04610C_A	NAG3	orf19.2158	0.334555	0.000341901
CAALFM_C406850CA	C4_03580W_A		orf19.1318	0.334354	0.00524802
CAALFM_C504720CA	C2_04620W_A		orf19.4488	0.334223	4.27e-06
CAALFM_C701270CA	C1_03320C_A	EHD3	orf19.3029	0.333927	0.0201319
CAALFM_C204370WA	C1_00820W_A		orf19.6024	0.333371	0.00459353
CAALFM_C206970WA	C1_00080C_A	RCA1	orf19.6102	0.331324	0.000146541
CAALFM_CR00640WA	C5_01070C_A		orf19.1964	0.330627	1.5e-06
CAALFM_C106390WA	C4_00260W_A		orf19.5651	0.330572	2.28e-05
CAALFM_C205480CA	CR_00970W_A	ATO9	orf19.3261	0.330489	0.475913
CAALFM_C113010WA	C2_05690C_A	YTH1	orf19.6881	0.329637	0.000958304
CAALFM_C102290CA	C2_09420W_A		orf19.1600	0.328718	1.35e-05
CAALFM_CR01530CA	C2_02990C_A	HYU1	orf19.5804	0.328647	1.33e-05
CAALFM_C400940WA	C6_01800W_A	ZCF18	NA	0.328617	0.891171
CAALFM_C603450CA	C5_04680W_A	PSD2	orf19.3954	0.328285	5.1e-06
CAALFM_C402170CA	CR_05300C_A	MNN21	orf19.1011	0.328207	7.09e-06
CAALFM_C702690CA	C1_01400C_A		orf19.3329	0.327916	2.98e-05
CAALFM_C704200CA	C6_03960W_A		orf19.5773	0.327851	9.01e-06
CAALFM_C402980WA	C2_02950W_A		orf19.5809	0.327838	0.0138334
CAALFM_C209520CA	C1_10420C_A		orf19.4912	0.327533	7.65e-05
CAALFM_C105870WA	C4_01380W_A	ZCF27	orf19.4649	0.327018	0.000612114
CAALFM_C207360WA	CR_02040W_A	PRK1	orf19.2605	0.326289	4.88e-06
CAALFM_C113400CA	C2_00970C_A	UBP13	orf19.2026	0.326202	0.00323353
CAALFM_CR06200CA	C6_03630W_A	PAD1	orf19.5731	0.326202	0.0136373
CAALFM_C201690WA	C4_00500W_A		orf19.4191.1	0.32603	0.000125766
CAALFM_C501730WA	C6_02990W_A		orf19.5578	0.325982	0.00263293
CAALFM_CR00540CA	C1_05910W_A	SIP5	orf19.2458	0.325689	0.000428136
CAALFM_C307700WA	C1_06850W_A	PCL7	orf19.6225	0.325417	0.000350674
CAALFM_CR08400CA	C1_13020C_A	SPC3	orf19.4930	0.325142	2.78e-05
CAALFM_C202080WA	C2_01660C_A		orf19.1477	0.324927	0.000779565
CAALFM_C111030WA	C6_00300C_A	STV1	orf19.1190	0.324603	5.11e-05
CAALFM_C106230CA	C4_00190W_A		orf19.5644	0.3246	0.0145057
CAALFM_C600860WA	C1_08780W_A		orf19.4736	0.324448	4.65e-05
CAALFM_C201030WA	C1_03330C_A		orf19.3030	0.324407	0.000725161
CAALFM_C404180CA	C3_07310C_A	SLK19	orf19.6763	0.324383	3.56e-06
CAALFM_CR05210WA	CR_10610C_A		orf19.7644	0.324042	0.0045146
CAALFM_C201950CA	C5_01040W_A		orf19.1968	0.323045	0.271077
CAALFM_C203230CA	C3_06950W_A		orf19.6805	0.323032	0.0935679
CAALFM_C209510CA	C3_07830W_A	FBP1	orf19.6179	0.322746	0.0505217
CAALFM_C401900CA	C3_04880W_A	PIN3	orf19.5956	0.32232	3.6e-05
CAALFM_C401930CA	CR_08250C_A	HSP104	orf19.6387	0.322242	0.00158547
CAALFM_C205430CA	C6_02620C_A		orf19.5532	0.322089	0.460574
CAALFM_C406150CA	CR_01090W_A		orf19.3245	0.32138	0.00114612
CAALFM_C108630WA	C3_07100C_A		orf19.6790	0.321328	0.00132173
CAALFM_CR06980WA	CR_07160C_A		orf19.733	0.321111	0.0889068
CAALFM_CR06450WA	C6_03150C_A		orf19.5601	0.320973	0.000704154
CAALFM_CR08330WA	CR_09460C_A		orf19.7341.1	0.320894	0.00184158
CAALFM_C203880CA	C3_07950C_A	SRB1	orf19.6190	0.320805	3.03e-05
CAALFM_C204540CA	C2_04060C_A	SSY1	orf19.814	0.320587	0.00107006
CAALFM_C404840CA	CR_02470W_A		NA	0.320545	0.00321889
CAALFM_C203830WA	C2_04390W_A		orf19.4515	0.320501	0.189676
CAALFM_C601530CA	C1_09740C_A		orf19.4837.1	0.320426	0.0725497
CAALFM_C106960WA	C2_10680W_A		orf19.5346	0.320237	0.000858323
CAALFM_C700470CA	C3_07490W_A		orf19.6739	0.320188	7.18e-05
CAALFM_C104030WA	C3_07330W_A		orf19.6758	0.320069	0.0206069
CAALFM_C304230WA	C6_02330W_A		orf19.3475	0.319472	0.0008673
CAALFM_C104730CA	C4_03470C_A	ECE1	orf19.3374	0.319157	2.19e-05
CAALFM_C601000CA	C1_00760W_A		orf19.6030	0.318799	0.000171668
CAALFM_C502170CA	C5_01950C_A	RIM21	orf19.3176	0.318633	0.00232404
CAALFM_C603550CA	C3_01220W_A		orf19.1729	0.318498	0.00319931
CAALFM_C307150CA	C2_02620W_A		orf19.1588	0.318491	0.000540735
CAALFM_C206810CA	C7_03170W_A	IFA21	orf19.5138	0.318481	0.000405925
CAALFM_C113360CA	C6_04230W_A		orf19.1080	0.317906	0.185773
CAALFM_C401010CA	C6_01010W_A	KAR5	orf19.103	0.317377	0.282867
CAALFM_C210170CA	C7_04000W_A		orf19.7181	0.316854	0.00100354
CAALFM_CR08440WA	C7_00240W_A		orf19.7098	0.316479	0.000235525
CAALFM_C307290WA	C1_13740W_A	KAR9	orf19.5011	0.316455	0.00108683
CAALFM_C401140CA	C5_03020W_A	CCC2	orf19.4328	0.316344	0.0142269
CAALFM_C208900WA	C7_00100W_A	FRP2	orf19.7112	0.315649	0.00424788
CAALFM_C300510WA	C1_12430W_A		orf19.5221	0.31556	0.000147346
CAALFM_CR01550CA	CR_09230C_A		orf19.7321	0.315425	0.000407206
CAALFM_CR01520WA	C5_05020C_A		orf19.3994	0.315314	7.95e-05
CAALFM_C501550CA	C3_06340W_A	HNT2	orf19.7419	0.315293	0.0679645
CAALFM_C405290WA	C1_07340W_A		orf19.4437	0.314576	0.00450106
CAALFM_C102400CA	CR_08060C_A	VPS21	orf19.589	0.314164	0.000568493
CAALFM_C601110WA	CR_10070C_A	ZCF39	orf19.7583	0.314127	0.00178923
CAALFM_C201060CA	C5_03970W_A		orf19.3214	0.313712	0.00603505
CAALFM_C700940WA	CR_08030C_A	FGR32	orf19.593	0.31364	0.00039994
CAALFM_C300720WA	C2_01900C_A		orf19.1500	0.313496	0.00305396
CAALFM_CR08090WA	CR_04880W_A		orf19.6305	0.312913	0.000347111
CAALFM_C111580WA	C3_06590W_A	LYS9	orf19.7448	0.3129	2.47e-06
CAALFM_C402880CA	C5_00490C_A	BUD2	orf19.940	0.312744	0.00028568
CAALFM_C501690CA	C4_06740C_A		orf19.3135	0.312491	4.18e-05
CAALFM_C200620CA	C4_00140C_A	HIS4	orf19.5639	0.312414	0.00182872
CAALFM_C210710WA	C2_10450W_A	NCE4	orf19.5320	0.312325	0.00986659
CAALFM_C401610CA	C5_01100C_A	CLN3	orf19.1960	0.311822	0.00364589
CAALFM_C307890WA	CR_08710W_A		orf19.6448	0.311645	0.000908428
CAALFM_C400880WA	C7_00300W_A		orf19.7092	0.311627	9.25e-05
CAALFM_C113500CA	C4_05920C_A	PGA49	orf19.4404	0.311473	0.0104487
CAALFM_C108110WA	C1_10680C_A		orf19.1840	0.31139	1.59e-06
CAALFM_C700530CA	C6_04550C_A		orf19.2149	0.311335	9.12e-05
CAALFM_C601630WA	C7_03690W_A		orf19.5508	0.311188	0.0900441
CAALFM_C108090CA	C1_10230C_A		orf19.4893	0.311138	0.000279637
CAALFM_C105990CA	C3_02860W_A	THI6	orf19.277	0.310779	0.00882227
CAALFM_C102460WA	C7_00790W_A		orf19.7038	0.310693	0.00031626
CAALFM_C108690WA	C5_00240W_A	SKN7	orf19.971	0.310601	0.000368252
CAALFM_C703990CA	C4_02510W_A		orf19.2751	0.310525	0.000798467
CAALFM_CR08130WA	C2_10530C_A	KIN3	orf19.5325	0.310503	0.000100328
CAALFM_C300960WA	C1_09870W_A	HCM1	orf19.4853	0.309528	0.0109963
CAALFM_C210140WA	C1_01260C_A	TRS20	orf19.3314	0.3095	0.0104791
CAALFM_C604050WA	C4_02120W_A	ERV29	orf19.4579	0.30913	5.48e-05
CAALFM_C406530CA	C7_02290W_A		orf19.6482	0.309114	0.21328
CAALFM_CR02370WA	C2_06340W_A	EFH1	orf19.5498	0.309111	0.140418
CAALFM_C100770CA	C2_00420W_A		orf19.2089	0.308528	0.00240111
CAALFM_C207910CA	C4_04330C_A		orf19.1414	0.308483	7.52e-05
CAALFM_C404350WA	C3_07040C_A	YSA1	orf19.6796	0.308479	0.000307191
CAALFM_C501850CA	C1_08740C_A	SEC24	orf19.4732	0.308178	0.000366271
CAALFM_C306740WA	CR_05710C_A		orf19.6641	0.308079	0.0508969
CAALFM_C502660CA	C1_12780W_A	RBK1	orf19.6344	0.30802	5.3e-05
CAALFM_C112770WA	CR_09050C_A		orf19.7301	0.307779	0.00909055
CAALFM_CR07940WA	C1_00220W_A	PHR2	orf19.6081	0.307403	1.28e-06
CAALFM_C307400WA	C2_01540W_A		orf19.1461	0.307112	0.028415
CAALFM_C209000CA	C2_07930C_A	VRP1	orf19.2190	0.306612	0.000179167
CAALFM_CR03740CA	C4_00010W_A	TLO9	orf19.362	0.306576	0.00023731
CAALFM_C403350CA	C7_04310C_A		orf19.7131	0.306363	0.00136147
CAALFM_C701450CA	C1_03270W_A		orf19.3021	0.306319	0.0950214
CAALFM_C114110CA	C1_00870W_A	LRO1	orf19.6018	0.305747	1.16e-05
CAALFM_C114280CA	CR_10020C_A		orf19.7578	0.305285	0.00277584
CAALFM_C401600CA	C4_06110C_A	TRP5	orf19.4718	0.305097	0.000459291
CAALFM_C304220CA	C2_01260W_A		orf19.1998	0.304619	0.0109505
CAALFM_C204960CA	C1_12900W_A		orf19.4921	0.304143	0.0018381
CAALFM_CR04050CA	C4_01960C_A		orf19.4596	0.304012	0.00177092
CAALFM_C402710CA	C2_03340W_A		orf19.894	0.303765	0.00402748
CAALFM_C600970CA	C5_03460C_A		orf19.2637	0.303381	0.0545003
CAALFM_C604060WA	C1_14590C_A	TLO4	orf19.7276.1	0.303379	0.00365929
CAALFM_C202960CA	C1_07120W_A	GAP4	orf19.4456	0.303311	2.06e-05
CAALFM_C701220WA	C4_06300C_A	PGA42	orf19.2907	0.303047	0.300328
CAALFM_C102040CA	CR_06940W_A	DSL1	orf19.2370	0.302758	0.029381
CAALFM_C203470CA	C1_02620C_A	HOM6	orf19.2951	0.302394	0.0011924
CAALFM_C406840WA	C5_04180W_A		orf19.3901	0.302362	0.0431122
CAALFM_C102330CA	C5_01470C_A		orf19.4142	0.302362	0.00597494
CAALFM_C600760WA	C2_03970W_A		orf19.827	0.301887	0.011371
CAALFM_C601030WA	C4_02690W_A		orf19.2730	0.301866	0.00792238
CAALFM_C704130CA	C2_01910W_A		orf19.1502	0.301826	0.0104743
CAALFM_C111240CA	C6_02660C_A		orf19.5536	0.301142	0.314369
CAALFM_C305540CA	CR_08920W_A		orf19.7288	0.300854	0.00441403
CAALFM_C405590WA	C4_06390W_A	SOU1	orf19.2896	0.30048	0.0610794
CAALFM_C107380CA	C3_02010C_A		orf19.1647	0.300244	0.331487
CAALFM_C206950CA	C1_08060W_A	OFR1	orf19.5078	0.299922	0.000227384
CAALFM_C203990WA	C1_14030W_A		orf19.7210	0.299833	0.0576779
CAALFM_CR10170CA	C3_02530W_A		orf19.242.2	0.299525	0.00369454
CAALFM_C102430CA	C3_05680W_A		orf19.7347	0.299276	0.000534905
CAALFM_C401740WA	C7_02540W_A		orf19.6456	0.299238	0.00152465
CAALFM_C114380CA	C1_12480W_A		orf19.68.2	0.299195	0.0952231
CAALFM_C305870CA	C1_10530W_A	SNL1	orf19.997	0.299146	0.000651002
CAALFM_C104510WA	C1_06660W_A		orf19.6245	0.298907	0.000274557
CAALFM_C202280WA	C4_00650W_A	HIS5	orf19.4177	0.298548	0.000793786
CAALFM_C205670CA	CR_03050C_A	ZCF11	orf19.2423	0.298341	0.00139956
CAALFM_C300450CA	C2_08940C_A	VPS28	orf19.212	0.298237	0.0120435
CAALFM_C500290WA	C2_05190W_A	CDC21	orf19.3549	0.298149	0.000213379
CAALFM_C500700CA	C6_04590C_A	NAG1	orf19.2156	0.298033	0.0974807
CAALFM_C207440CA	CR_00170W_A	ZCF38	orf19.7518	0.297897	0.00844089
CAALFM_C401260WA	C3_00850C_A		orf19.6160	0.297892	8.3e-06
CAALFM_CR04810WA	C1_11920W_A		orf19.5275	0.2973	0.000479837
CAALFM_CR03540WA	C4_00920C_A		orf19.4702	0.296879	0.0218125
CAALFM_C208140CA	C2_01300C_A	MNN24	orf19.1995	0.296465	0.000314305
CAALFM_C400930WA	C4_03540C_A	ECM38	orf19.1325	0.296328	0.0504871
CAALFM_C111080WA	CR_07690W_A		orf19.3487	0.296044	0.00563166
CAALFM_C102850WA	C1_10140C_A		orf19.4883	0.295933	0.0264607
CAALFM_C603600CA	C1_08650C_A	FAD1	orf19.4723	0.295673	0.00262536
CAALFM_C208260WA	CR_06580W_A		orf19.693	0.295623	0.873067
CAALFM_C604070CA	C2_07750W_A	RHO2	orf19.2204.2	0.295455	0.000852755
CAALFM_C301980CA	C1_11340W_A	PRM1	orf19.669	0.295185	0.471648
CAALFM_C102790WA	CR_03520C_A		orf19.4395	0.294892	0.00117799
CAALFM_C103900WA	C6_01100W_A	SEC9	orf19.117	0.294681	0.000156023
CAALFM_C502410CA	C4_06660W_A		orf19.2866	0.293328	0.237113
CAALFM_C702640WA	C4_03510C_A	HWP2	orf19.3380	0.292869	0.554214
CAALFM_C405160CA	C1_01190C_A		orf19.3307	0.291823	0.0070032
CAALFM_C111150WA	C3_02320W_A	ILV2	orf19.1613	0.291688	0.00270113
CAALFM_C500620WA	C7_03090C_A	SSP96	orf19.5145	0.291155	0.098812
CAALFM_C501490CA	C4_00180W_A	ECM7	orf19.5643	0.290969	0.00950758
CAALFM_C403700WA	C1_12030W_A	SER33	orf19.5263	0.290786	2.37e-05
CAALFM_C111220CA	CR_04030W_A	NIP100	orf19.486	0.290645	0.0077041
CAALFM_C206430CA	C7_00610C_A		orf19.7058	0.290567	0.00277662
CAALFM_C601450CA	C5_05070W_A		orf19.3999	0.290387	0.00138957
CAALFM_C502730CA	C1_02340C_A		NA	0.28995	0.476859
CAALFM_CR08590WA	C2_07290W_A		orf19.2286	0.289772	4.15e-05
CAALFM_C405060WA	C2_05890C_A	IDP1	orf19.5211	0.289638	0.00143915
CAALFM_C103010WA	CR_00990W_A		orf19.3259	0.289433	0.000926778
CAALFM_C102420CA	CR_01830C_A	PTR2	orf19.2583	0.288928	0.640916
CAALFM_C404310WA	C4_00080C_A		orf19.376	0.288556	0.0657074
CAALFM_C206830CA	C7_02520W_A		orf19.6458	0.287831	0.0541162
CAALFM_C106510CA	C4_02570C_A		orf19.2743	0.287659	0.096123
CAALFM_C306540CA	C7_03160W_A		orf19.5139	0.287162	0.000734364
CAALFM_C701870WA	C7_03360W_A	CPY1	orf19.1339	0.286631	0.0455621
CAALFM_C301490WA	C7_02630W_A		orf19.3701	0.286517	0.00835961
CAALFM_C700490CA	C3_04420W_A		orf19.5892	0.286455	0.00158849
CAALFM_C701790CA	C2_04420W_A	IFA4	orf19.4510	0.28645	0.176406
CAALFM_C303720WA	C6_02980C_A		orf19.5576	0.286419	2.11e-05
CAALFM_C405890WA	C6_00140C_A	HPA2	orf19.6323	0.286324	0.00371442
CAALFM_C304960WA	C1_08130C_A	TERT	orf19.5089	0.286122	0.00280421
CAALFM_C203580WA	C6_00210W_A		orf19.1180	0.285931	0.000568988
CAALFM_C500740WA	CR_10310W_A		orf19.7606	0.285674	0.374472
CAALFM_C305520CA	C2_01350C_A	SNX4	orf19.1990	0.285443	0.000849405
CAALFM_C600530CA	C4_03880W_A		orf19.5043	0.285211	0.0178249
CAALFM_C208760CA	C2_10660W_A	ASH1	orf19.5343	0.285154	0.004705
CAALFM_C701700WA	C4_06730C_A		orf19.3136	0.284881	0.000621462
CAALFM_C205710CA	CR_09410W_A		orf19.7337	0.28488	0.00142019
CAALFM_CR06670WA	C1_02530C_A	DIP5	orf19.2942	0.284432	0.0522912
CAALFM_C307620CA	C3_05970C_A		orf19.7378	0.284401	5.13e-05
CAALFM_C600650CA	C3_00310C_A		orf19.5438	0.284142	0.108769
CAALFM_C305570WA	C1_13650C_A		orf19.5003	0.283553	0.00444937
CAALFM_C302370CA	C2_08430C_A	PGA46	orf19.3638	0.283224	0.399037
CAALFM_C600600CA	CR_00600C_A		orf19.7473	0.28311	0.0025681
CAALFM_C600690WA	C2_02890W_A	SCT2	orf19.5815	0.282705	0.000166651
CAALFM_C502190CA	C4_02860W_A		orf19.2710	0.282467	0.000440159
CAALFM_C201970CA	C1_12120W_A		orf19.5253	0.282135	0.00324578
CAALFM_C306170CA	CR_09560C_A		orf19.6606	0.281741	0.0144501
CAALFM_C603390WA	C1_03730C_A	MNS1	orf19.1036	0.281626	0.00150684
CAALFM_C303270WA	CR_05370W_A		NA	0.281295	0.10138
CAALFM_C209170WA	C5_03750W_A	FAV2	orf19.1120	0.280386	0.0176835
CAALFM_C601550CA	C4_05610C_A		orf19.1246	0.280281	3.12e-05
CAALFM_C204160WA	C1_03100W_A		orf19.3003	0.280029	3.9e-05
CAALFM_C305100CA	C5_01530C_A		orf19.4148	0.279387	0.000759844
CAALFM_C703230CA	C1_00680W_A	ASM3	orf19.6037	0.27937	0.00853405
CAALFM_CR05480WA	C5_00830C_A	ERV46	orf19.586	0.279098	0.000422235
CAALFM_C602070CA	C1_07230W_A	PHO15	orf19.4444	0.278907	9.39e-05
CAALFM_C305210CA	C2_04660C_A	YAK1	orf19.147	0.278697	0.00194587
CAALFM_C303040WA	CR_06340C_A	PGI1	orf19.3888	0.278047	0.000159453
CAALFM_C503060CA	CR_03880W_A	IFF9	orf19.465	0.277917	0.00255449
CAALFM_CR10420WA	C1_00360W_A	CDC13	orf19.6072	0.277896	0.00619216
CAALFM_C113380WA	C4_00050W_A		orf19.371	0.277812	0.00132085
CAALFM_C401050CA	C3_02510C_A	SAP8	orf19.242	0.277798	0.108281
CAALFM_C502000CA	C1_06130C_A	HAC1	orf19.2432	0.277613	4.58e-05
CAALFM_CR03760WA	C2_07270W_A		orf19.2284	0.277224	0.00269982
CAALFM_C100540CA	CR_00610W_A	IFF4	orf19.7472	0.277103	0.0727541
CAALFM_C406830CA	C2_09330C_A		orf19.4094	0.27674	0.877619
CAALFM_C109140CA	C3_01840C_A	MNT2	NA	0.27674	0.877619
CAALFM_CR06970CA	C1_05020C_A	ARG2	orf19.56	0.276563	0.00148455
CAALFM_C111620WA	C1_01700W_A	ARP8	orf19.3359	0.276252	0.000473465
CAALFM_C105010CA	C6_04490W_A	LIP4	orf19.2133	0.276112	0.0249571
CAALFM_C500510WA	C1_10490W_A	LKH1	orf19.992	0.276077	0.000100668
CAALFM_C106770WA	C1_02990C_A	XOG1	orf19.2990	0.275881	0.0822034
CAALFM_CR07630CA	C2_04210W_A	STE4	orf19.799	0.275847	0.0383894
CAALFM_CR08730WA	C2_07730W_A	YVC1	orf19.2209	0.275258	0.000267843
CAALFM_C205020WA	C3_07350W_A		orf19.6756	0.274772	0.00661821
CAALFM_CR05200CA	C5_02680W_A		orf19.4286	0.274746	0.0499508
CAALFM_C504120CA	C1_00390W_A	ENA2	orf19.6070	0.274149	0.0118023
CAALFM_C114340CA	C1_01280C_A	MED22	orf19.3317	0.274094	0.0788942
CAALFM_C405420CA	C4_04110W_A		orf19.5299.1	0.274039	0.0268349
CAALFM_CR03790CA	C6_01820C_A	FPG1	orf19.3402	0.273797	0.00112101
CAALFM_C205390CA	C1_10450W_A	GLY1	orf19.986	0.273192	0.000742489
CAALFM_C110200CA	CR_10030W_A	FGR34	orf19.7579	0.272716	0.00184219
CAALFM_C406090CA	C6_00700C_A		orf19.3659	0.27202	0.00668389
CAALFM_C403250CA	C1_09430W_A		orf19.4805	0.271987	0.00204159
CAALFM_C201220WA	C3_04320W_A	VAM3	orf19.5875	0.271656	0.014377
CAALFM_C100940WA	C3_04530C_A	TEC1	orf19.5908	0.27161	0.000841619
CAALFM_C202030WA	C4_00020W_A		orf19.364	0.271588	0.00129517
CAALFM_C112910WA	C3_02410C_A		orf19.229	0.271465	0.0031149
CAALFM_C701190WA	C1_01880C_A	PTR3	orf19.4535	0.2711	0.0150364
CAALFM_CR08480CA	C5_01760C_A	PIKA	orf19.3199	0.270986	0.00565112
CAALFM_C109970CA	C1_05960W_A	PGA45	orf19.2451	0.270941	3.08e-05
CAALFM_C307690CA	CR_00220W_A		orf19.7512	0.270628	0.0337608
CAALFM_C104290CA	C1_11310C_A	PSP1	orf19.671	0.270506	0.000501976
CAALFM_CR02360WA	C2_08890W_A		orf19.217	0.270404	0.240691
CAALFM_C602530CA	C4_05080C_A		orf19.3769	0.269207	0.00185141
CAALFM_C101470WA	CR_06620W_A		orf19.697	0.269108	0.00563388
CAALFM_CR00360CA	CR_00270C_A		orf19.7507	0.268581	0.0386221
CAALFM_C100970WA	C1_02570C_A	PUT4	orf19.2945	0.268549	0.11103
CAALFM_CR06560CA	C1_12490W_A	PEP1	orf19.3767	0.268312	3.73e-05
CAALFM_CR00710CA	C3_07850W_A		orf19.6180	0.268229	0.00264452
CAALFM_C203090CA	C1_11250W_A		orf19.676	0.26795	0.000438613
CAALFM_C504440CA	C3_02160C_A		orf19.1630	0.267849	0.018659
CAALFM_C108100WA	C2_07940C_A	ALG7	orf19.2187	0.267616	0.000869719
CAALFM_C404130WA	C1_12860C_A		orf19.4916	0.267406	0.0791823
CAALFM_C703220CA	C4_07250C_A	TLO10	orf19.3074	0.26733	0.00299943
CAALFM_C208920WA	C3_06680C_A		orf19.7457	0.266948	0.0459729
CAALFM_C204600CA	C3_01890C_A		orf19.1658	0.266487	8.6e-05
CAALFM_C113050WA	C2_00100C_A	PGA52	orf19.1911	0.266247	0.000718146
CAALFM_C307390CA	C3_03080W_A		orf19.305	0.265944	0.00269875
CAALFM_C403190WA	C2_10440C_A	RAD1	orf19.5318	0.265636	0.00584325
CAALFM_C305950WA	C5_01920C_A		orf19.3180	0.2654	0.00593433
CAALFM_C103110WA	CR_03260W_A		orf19.2397.3	0.265252	0.0503703
CAALFM_C404900WA	C7_01850C_A	CRN1	orf19.6534.2	0.265156	0.00217492
CAALFM_C702450WA	C6_04470C_A		orf19.2131	0.264944	0.00196789
CAALFM_C305770CA	C3_02690C_A		orf19.261	0.26462	0.00554749
CAALFM_CR10400WA	C3_06620W_A	FUN31	orf19.7451	0.264267	0.00158149
CAALFM_C106450CA	C6_00280W_A	CPH2	orf19.1187	0.264182	0.0342033
CAALFM_C404480CA	C1_12960C_A	BNI1	orf19.4927	0.264172	0.000936071
CAALFM_C601480WA	C4_06140C_A		orf19.2923	0.264164	0.0186559
CAALFM_C306410CA	C7_01920W_A	CDC34	orf19.6529	0.264102	0.000125111
CAALFM_C603080CA	C2_06190W_A	ILV1	orf19.5480	0.263795	0.00310444
CAALFM_C405190CA	C3_00210C_A		orf19.5449	0.263639	0.119024
CAALFM_C102900CA	C4_01510W_A		orf19.4633	0.263494	0.00116438
CAALFM_C203960WA	C2_04250W_A	VPS36	orf19.795	0.263464	0.00949372
CAALFM_C307250WA	C7_00850W_A		orf19.7032	0.263256	0.0735749
CAALFM_CR03950WA	C3_06080W_A	REV3	orf19.7389	0.263181	0.0017837
CAALFM_C402960WA	C4_06360C_A		orf19.2899	0.26295	0.574411
CAALFM_C101170CA	C4_05430C_A	GAP5	orf19.1799	0.262661	0.000858363
CAALFM_C206160WA	C4_06020C_A		orf19.4412	0.261874	0.00228165
CAALFM_C200800CA	C5_03050C_A	PGA58	orf19.4334	0.261824	0.442266
CAALFM_C302400CA	C1_09950C_A		orf19.4862	0.261787	0.00707988
CAALFM_C505120WA	C1_10610W_A	FCY23	orf19.1832	0.261635	0.000431654
CAALFM_C102490CA	C1_12150C_A		orf19.5249	0.261503	0.160507
CAALFM_C501450WA	C1_09850C_A		orf19.4850	0.261361	0.00184774
CAALFM_C205400WA	C2_06210C_A	SER1	orf19.5484	0.261246	0.000430031
CAALFM_C102090CA	C2_03380W_A	PAN1	orf19.886	0.260954	0.00627036
CAALFM_C102240WA	C4_00570C_A	PCT1	orf19.4186	0.260789	0.000172728
CAALFM_C103410WA	C5_04150C_A		orf19.3898	0.260693	0.0418396
CAALFM_C107700CA	C1_03670C_A	DAO1	orf19.3065	0.260456	0.00907306
CAALFM_C302620CA	C5_00580W_A		orf19.931	0.2602	0.000550905
CAALFM_C603200WA	CR_00280C_A		orf19.7506	0.259978	0.0143471
CAALFM_C111110CA	CR_05540C_A		orf19.5848	0.259686	0.0224676
CAALFM_C111230WA	C1_11890W_A		orf19.5278	0.259404	0.0168338
CAALFM_C601470WA	C3_07810C_A	SEC61	orf19.6176	0.258578	0.000341072
CAALFM_C403230CA	C2_09940W_A	GCN4	orf19.1358	0.258017	0.000488691
CAALFM_C302110WA	CR_03460W_A		orf19.4388	0.257644	0.00387268
CAALFM_C204050CA	C4_00360C_A	RCH1	orf19.5663	0.25754	0.00510323
CAALFM_C109370WA	C6_00240C_A		orf19.1182	0.257297	0.0451109
CAALFM_C700480WA	C6_04600W_A	DAC1	orf19.2157	0.257287	0.0284125
CAALFM_CR03430WA	C6_00720C_A	COX15	orf19.3656	0.257214	0.00577717
CAALFM_CR04620CA	C6_01790C_A	ZCF18	orf19.3405	0.256841	0.00926228
CAALFM_CR08740WA	CR_05490W_A	SUA72	orf19.3519	0.256707	0.0299636
CAALFM_C106470WA	C4_03280W_A	MSN5	orf19.2665	0.256684	0.000748133
CAALFM_C101250WA	C2_03370W_A	THI20	orf19.889	0.256654	0.208263
CAALFM_C503330CA	C1_02740C_A		orf19.2963	0.256098	0.0380276
CAALFM_C204710CA	CR_03960C_A		orf19.478	0.255597	0.0166855
CAALFM_CR03210CA	C4_04980W_A		orf19.3782	0.255409	0.00536646
CAALFM_CR07400CA	C1_05600W_A	GSL1	orf19.2495	0.255189	0.00368023
CAALFM_C302470CA	C3_07560W_A	TCC1	orf19.6734	0.255103	0.000657607
CAALFM_C108560WA	C1_12360C_A	RIB3	orf19.5228	0.254822	0.000647653
CAALFM_C203420CA	C4_02420C_A		orf19.2761	0.254758	0.00820327
CAALFM_C305610WA	C1_08370W_A	SDS24	orf19.5118	0.254705	0.0071965
CAALFM_C204560WA	C1_08480C_A	APS3	orf19.393	0.253976	0.0232146
CAALFM_CR00860CA	C5_04330W_A		orf19.3919.1	0.253945	0.00356899
CAALFM_C703010WA	CR_10570C_A	YHB4	orf19.7637	0.253746	0.0931268
CAALFM_C505410CA	C3_05710W_A	RCT1	orf19.7350	0.253698	0.0650757
CAALFM_C500190CA	C5_03780C_A		orf19.1116	0.253607	0.025371
CAALFM_C401520CA	C5_01230C_A		orf19.1946	0.253205	0.0010961
CAALFM_C206240WA	C4_07210W_A		orf19.3084	0.253194	0.0089658
CAALFM_C704210CA	C7_02380C_A	CYP1	orf19.6472	0.252698	0.000413478
CAALFM_C114260CA	C6_01520W_A		orf19.3432	0.25232	0.344286
CAALFM_CR00230WA	C6_00350W_A	PKH3	orf19.1196	0.25134	0.00422276
CAALFM_C107820WA	C2_01500W_A		orf19.1456	0.250627	0.226587
CAALFM_C500950CA	C2_01110C_A	BCY1	orf19.2014	0.250561	0.00036252
CAALFM_C300930WA	C2_01730W_A		orf19.1484	0.250361	0.0977827
CAALFM_C101860WA	C4_05690W_A	SEC23	orf19.1254	0.250173	0.0029919
CAALFM_CR00190WA	C5_02060W_A		orf19.3163	0.250015	0.0459681
CAALFM_C306640WA	C5_04540C_A		orf19.3940	0.249363	0.098922
CAALFM_C500550CA	C5_05260W_A		orf19.4019	0.248907	0.0966246
CAALFM_C600740WA	C3_01570W_A		orf19.1686	0.248715	0.0175275
CAALFM_C106460CA	C2_04360W_A		orf19.4518	0.248284	0.00432332
CAALFM_C401730CA	C6_03580W_A		orf19.5725	0.247742	0.0285125
CAALFM_C113900CA	C3_00170C_A		orf19.5455	0.247742	0.00108038
CAALFM_C109450CA	C1_04680W_A	PIL1	orf19.778	0.247594	0.000182579
CAALFM_C400670WA	C1_01780C_A	HOL4	orf19.4546	0.247557	0.0122738
CAALFM_C702200WA	CR_04130C_A	EAF7	orf19.497	0.247387	0.00136976
CAALFM_C206780CA	C6_01430C_A	FRP6	orf19.3441	0.247142	0.0153671
CAALFM_C504620CA	C1_06930W_A	PGA63	orf19.6217	0.247104	0.0164235
CAALFM_C206520CA	C1_07350C_A	GPX3	orf19.4436	0.246627	0.0343677
CAALFM_C109350WA	C4_06670W_A		orf19.3142	0.246483	0.0403428
CAALFM_C200150WA	C1_04900W_A	MNN15	orf19.753	0.2464	0.00732426
CAALFM_C702940CA	CR_08260C_A		orf19.6390	0.246303	0.699551
CAALFM_C306660CA	C3_01470W_A	ARF3	orf19.1702	0.246225	0.000847371
CAALFM_C403940CA	C1_01650W_A	ISN1	orf19.3355	0.245871	0.000866865
CAALFM_C304680WA	CR_08690C_A	ECI1	orf19.6445	0.24578	0.0385429
CAALFM_C702160WA	CR_10580W_A	PRO1	orf19.7638	0.245544	0.0377235
CAALFM_C203700WA	C3_03170W_A	SEC13	orf19.316	0.245346	0.00331242
CAALFM_C101350CA	C1_00630W_A		orf19.6043	0.245308	0.0364967
CAALFM_C403070WA	C2_05250C_A	AAT1	orf19.3554	0.245059	0.000336572
CAALFM_C203820CA	C4_03570W_A	HWP1	orf19.1321	0.245007	0.0172634
CAALFM_C404070CA	CR_03810W_A	PRP13	orf19.4379	0.244972	0.00819176
CAALFM_CR01100CA	C1_14470W_A		orf19.7265	0.2447	0.00535082
CAALFM_C703920CA	C1_01740W_A	CTN1	orf19.4551	0.244364	0.541486
CAALFM_C114330WA	C1_13800C_A	DUR32	orf19.5017	0.244224	0.15376
CAALFM_C204650CA	C3_02090C_A		orf19.1637	0.244114	0.0045847
CAALFM_C101040WA	C6_00100C_A	HET1	orf19.6327	0.243984	0.000618452
CAALFM_C305370CA	C6_02850W_A	RAV2	orf19.5559	0.243456	0.0167183
CAALFM_C201320WA	C6_04410C_A		orf19.2124	0.243309	0.00494052
CAALFM_CR03120WA	C2_06010W_A	SPO72	orf19.4119	0.243304	0.00536959
CAALFM_C601150WA	C6_03300C_A		orf19.5618	0.24314	0.00957677
CAALFM_C207040WA	CR_01260W_A		orf19.3228	0.243139	0.00277384
CAALFM_CR04540CA	C1_01070C_A		orf19.3295	0.242874	0.0110549
CAALFM_C111040WA	C3_07570C_A		orf19.6732	0.242298	0.0962081
CAALFM_CR09690CA	C2_04490W_A		orf19.4503	0.242203	0.00510398
CAALFM_C500500WA	C4_00240C_A	PRO3	orf19.5650	0.242112	0.034069
CAALFM_C700960WA	C3_03060W_A		orf19.302	0.242049	0.0333837
CAALFM_C112390CA	C5_02290W_A	PDE1	orf19.4235	0.241808	0.208221
CAALFM_C503070WA	C1_08010W_A	DPM1	orf19.5073	0.24151	0.000430259
CAALFM_C110960WA	C2_07170C_A	AFT2	orf19.2272	0.241421	0.00456256
CAALFM_C501540WA	C2_04460W_A	LYS22	orf19.4506	0.241368	0.000503268
CAALFM_CR05910WA	C4_00070C_A		orf19.374	0.241296	0.000372021
CAALFM_C106640CA	C4_06510C_A	CSO99	orf19.2883	0.241205	0.0642838
CAALFM_C503790WA	C3_03660W_A	IRS4	orf19.6953	0.240789	0.00705618
CAALFM_C401940WA	C3_03760W_A		orf19.6941	0.240712	0.0280656
CAALFM_C110870WA	C7_01410C_A	NBP2	orf19.6588	0.240689	0.0144292
CAALFM_C701950WA	C1_14320C_A		orf19.7244	0.240164	0.002166
CAALFM_C600200CA	C2_00490W_A		orf19.2078	0.239929	0.00635141
CAALFM_CR10160WA	CR_06590C_A	RGS2	orf19.695	0.239869	0.0716497
CAALFM_C210550CA	C2_03610W_A	FMO2	orf19.857	0.239519	0.0976185
CAALFM_C102360CA	C6_02140W_A		orf19.3453	0.239327	0.00385336
CAALFM_C604130CA	C1_03450C_A		orf19.3047	0.239281	0.00104708
CAALFM_C110690WA	CR_09530C_A		orf19.6608	0.238626	0.0754262
CAALFM_C406070CA	C2_04140W_A	CHS5	orf19.807	0.238225	0.00231879
CAALFM_CR10380CA	CR_02140W_A	RSR1	orf19.2614	0.238032	0.00165931
CAALFM_C700810WA	C4_06990W_A		orf19.3110	0.237488	0.036198
CAALFM_CR02850CA	C7_04060W_A		orf19.7173	0.237179	0.0810617
CAALFM_C604220CA	C4_04430W_A	MRP8	orf19.3844	0.237003	0.0096434
CAALFM_C504860CA	C3_07020W_A	SSN6	orf19.6798	0.236913	0.0160518
CAALFM_C404500CA	C1_01710W_A		orf19.3360	0.23632	0.0122939
CAALFM_C604450WA	C3_00440W_A		orf19.5422	0.235546	0.231122
CAALFM_C402470CA	C6_00770C_A		orf19.3648	0.235506	0.0252165
CAALFM_C114150CA	C1_11930W_A		orf19.5274	0.235411	0.00720043
CAALFM_C504630WA	C1_00520W_A		orf19.6056	0.23524	0.00749059
CAALFM_C102670CA	C3_05840W_A		orf19.7364	0.235237	0.693182
CAALFM_C305200WA	C1_05940W_A	PHO87	orf19.2454	0.235103	0.00641026
CAALFM_C107090CA	C1_07680W_A	HAP2	orf19.1228	0.23508	0.00486268
CAALFM_C112990WA	C2_07430C_A		orf19.1888	0.234928	0.0228431
CAALFM_C304330CA	C3_03050C_A	PGA18	orf19.301	0.234632	0.00963747
CAALFM_CR05970CA	C1_02020W_A		orf19.4523	0.234197	0.103973
CAALFM_C108850CA	C4_00680W_A		orf19.4174	0.23416	0.0257499
CAALFM_C105420WA	C5_03570W_A		orf19.6668	0.233514	0.00733645
CAALFM_C204070CA	CR_10040W_A		orf19.7580	0.233396	0.0827185
CAALFM_CR01380WA	C1_09640W_A	ADE12	orf19.4827	0.233101	0.00190295
CAALFM_C100440WA	C1_06250W_A		orf19.1825	0.232788	0.0509035
CAALFM_C503710CA	C2_01150W_A	PEX12	orf19.2009	0.232575	0.0237606
CAALFM_C703040WA	C2_00350W_A		orf19.2097	0.232417	0.00943327
CAALFM_CR04600WA	C3_04110C_A	MBP1	orf19.5855	0.23207	0.0152405
CAALFM_C702020WA	C4_00910C_A		orf19.4703	0.232021	0.00696815
CAALFM_C403750CA	CR_03610C_A	VTC3	orf19.4381	0.23159	0.00735721
CAALFM_C402540WA	CR_05250C_A	FGR13	orf19.562	0.231388	0.0812709
CAALFM_C205580WA	C3_06290W_A		orf19.7403	0.231136	0.00822984
CAALFM_C305410WA	C2_02240C_A	HEX3	orf19.1542	0.23069	0.00257883
CAALFM_C201130WA	C4_03690C_A		orf19.1309	0.230585	0.134498
CAALFM_C100740CA	C6_00490W_A		orf19.4210	0.229963	0.0381446
CAALFM_C601970CA	C1_08140W_A		orf19.5090	0.229892	0.0318503
CAALFM_C307420WA	C2_04410W_A		orf19.4511	0.229769	0.0298626
CAALFM_C503390CA	C1_06280C_A	UME6	orf19.1822	0.229651	0.0934922
CAALFM_C108600CA	C3_07450C_A		orf19.6744	0.229502	0.123123
CAALFM_C601610WA	C2_10630W_A		orf19.5342	0.229285	0.0191022
CAALFM_CR07280WA	C2_07240C_A		orf19.2281	0.229199	0.169323
CAALFM_C209430WA	C2_08110W_A	RAD57	orf19.2174	0.229123	0.0293833
CAALFM_CR06530WA	C2_00080C_A	FAV3	orf19.1914	0.228947	0.0320259
CAALFM_C703530CA	CR_07450C_A	MNL1	orf19.6121	0.228887	0.00234
CAALFM_C307260CA	C1_04780C_A		orf19.764	0.228771	0.0199718
CAALFM_C602240CA	C3_03150W_A		orf19.314	0.228669	0.00776949
CAALFM_C503260CA	C4_02070W_A	PHO114	orf19.4584	0.22865	0.0983865
CAALFM_C204640CA	C5_04410C_A		orf19.3928	0.228379	0.0256867
CAALFM_C407240WA	C2_03160C_A	RNR1	orf19.5779	0.227924	0.0101803
CAALFM_CR10830CA	C1_12530C_A		orf19.3763	0.22792	0.0252194
CAALFM_C103030WA	C3_00240C_A	GLO3	orf19.5445	0.227857	0.0077513
CAALFM_C502620CA	CR_04040C_A	SPT14	orf19.487	0.227713	0.0225434
CAALFM_C407160WA	C1_11720W_A		orf19.1146	0.227702	0.0738617
CAALFM_C200860CA	C1_08550C_A	GCF1	orf19.400	0.227509	0.00450356
CAALFM_C301310WA	C6_00540W_A		orf19.4206	0.227096	0.0450487
CAALFM_C404650WA	C3_07090W_A	HHT1	orf19.6791	0.226889	0.0034912
CAALFM_CR08610WA	C2_08740W_A		orf19.3601	0.226776	0.00990467
CAALFM_C504650CA	CR_00420W_A		orf19.7490	0.226767	0.10757
CAALFM_C306010WA	C7_03810W_A	SLA2	orf19.7201	0.2267	0.00223844
CAALFM_C113520CA	C1_03720C_A		orf19.1037	0.226628	0.00860976
CAALFM_C109050WA	C2_05200C_A	SGO1	orf19.3550	0.226496	0.0105785
CAALFM_C101370CA	C1_08470W_A		orf19.392	0.226341	0.0450588
CAALFM_CR04300WA	C1_06020W_A	RGD1	orf19.2443	0.226228	0.0434889
CAALFM_C108910CA	C6_01760W_A	SEC12	orf19.3409	0.226185	0.00661148
CAALFM_C404630CA	C1_11130W_A	FGR16	orf19.2303	0.225947	0.0804042
CAALFM_CR01330WA	C3_04970C_A		orf19.5965	0.225862	0.0152288
CAALFM_C101480CA	CR_05360C_A		orf19.5287	0.225853	0.0197984
CAALFM_C202170WA	C7_00090C_A	CSA1	orf19.7114	0.225845	0.0365265
CAALFM_C112130CA	CR_02630C_A		orf19.2822	0.225531	0.1585
CAALFM_C305240CA	C1_05200C_A		orf19.446	0.225508	0.0203145
CAALFM_CR04370WA	C2_02570W_A		orf19.1582	0.225472	0.120783
CAALFM_C703500WA	CR_10530W_A		orf19.7632	0.225364	0.0440295
CAALFM_C406170CA	C6_02280W_A		orf19.3469	0.225256	0.0133517
CAALFM_C204940CA	C5_05320C_A	HIS1	orf19.4026	0.22514	0.0156641
CAALFM_C100460WA	C5_00220W_A	ROT2	orf19.974	0.22454	0.0022973
CAALFM_CR04500CA	CR_10060W_A		orf19.7581	0.224208	0.00452664
CAALFM_CR10430CA	C3_00200C_A	ETR1	orf19.5450	0.224208	0.00262844
CAALFM_C204980CA	C1_01630W_A		orf19.3353	0.22397	0.00915309
CAALFM_C205410WA	CR_07580C_A	TSC11	orf19.728	0.223939	0.0173255
CAALFM_CR01980CA	C5_00760W_A		orf19.578	0.223521	0.00924462
CAALFM_C403150WA	C2_08790W_A	JEM1	orf19.3592	0.222981	0.00697034
CAALFM_C701070CA	CR_02390W_A		orf19.3728	0.222965	0.00383135
CAALFM_C304400CA	C1_12400C_A		orf19.5225	0.222898	0.0365672
CAALFM_C202220CA	C5_01770C_A	OBPA	orf19.3198	0.222768	0.00186309
CAALFM_CR10620CA	C4_03450C_A	JAB1	orf19.3371	0.222691	0.0105777
CAALFM_C110480WA	C1_04220C_A		orf19.1057	0.222518	0.0109156
CAALFM_CR05390WA	C1_04910C_A		orf19.752	0.222012	0.00586446
CAALFM_C109810WA	C1_07260C_A		orf19.4441	0.221775	0.0114804
CAALFM_C604290WA	C3_01670W_A		orf19.1677	0.221613	0.00327041
CAALFM_CR07290WA	C6_04400W_A		orf19.2123	0.221375	0.117389
CAALFM_C401640CA	C7_03320C_A	MED16	orf19.1343	0.221223	0.00996129
CAALFM_C501110WA	C3_05470W_A	TEA1	orf19.6985	0.221209	0.0156304
CAALFM_C301950CA	CR_05020W_A	LYP1	orf19.651	0.221081	0.192809
CAALFM_C207830WA	C7_00060C_A		orf19.7118	0.220487	0.00606859
CAALFM_C601700WA	C7_00130W_A		orf19.7110	0.219838	0.0461161
CAALFM_C204730WA	C3_04100W_A		orf19.5854.1	0.219677	0.197408
CAALFM_C401270WA	CR_09470W_A	AXL1	orf19.7342	0.219621	0.0484746
CAALFM_CR09580CA	CR_04350C_A		orf19.524	0.21962	0.0302559
CAALFM_C403930CA	C1_02630C_A	EXG2	orf19.2952	0.219547	0.0290048
CAALFM_C405750CA	C5_04280C_A	GLN3	orf19.3912	0.219218	0.00452744
CAALFM_C105660CA	C3_04440C_A		orf19.5894	0.218976	0.656823
CAALFM_CR09520CA	C2_02760W_A	LHS1	orf19.5830	0.218815	0.00563697
CAALFM_C300980WA	C4_03870C_A	NA	orf19.5042	0.218811	0.184973
CAALFM_C602880WA	C2_08960C_A		orf19.210	0.218628	0.0842545
CAALFM_C206710WA	C1_01080W_A		orf19.3296	0.21851	0.0395312
CAALFM_C700710WA	C1_14170W_A		orf19.7224	0.218477	0.00561274
CAALFM_C401120CA	C6_03330C_A		orf19.5621	0.218415	0.00735927
CAALFM_C206560WA	C7_00020C_A	RVS161	orf19.7124	0.218001	0.00114932
CAALFM_C113140CA	CR_03510W_A		orf19.4394	0.217616	0.505832
CAALFM_C405640CA	C7_00450C_A		orf19.7074	0.217525	0.0652811
CAALFM_C200470WA	C2_10480W_A	MDH1-3	orf19.5323	0.217455	0.0122311
CAALFM_C100780CA	C7_00270W_A		orf19.7095	0.217244	0.00436131
CAALFM_C107510WA	CR_03710C_A		orf19.4370	0.217166	0.316148
CAALFM_C301420CA	C2_01920C_A		orf19.1504	0.216776	0.00496446
CAALFM_C206640CA	C1_00670C_A	UGA32	orf19.6038	0.21651	0.0758116
CAALFM_C307410CA	C6_02930W_A		orf19.5569	0.216202	0.00463659
CAALFM_C305700WA	C3_06890W_A	PMT2	orf19.6812	0.215961	0.00437533
CAALFM_C304830CA	C5_01440C_A		orf19.4134	0.215492	0.046349
CAALFM_C206790WA	C2_07650C_A		orf19.1860.1	0.215405	0.0268558
CAALFM_C110190WA	C1_10940C_A	ERP5	orf19.2322.3	0.215396	0.00523716
CAALFM_C103090WA	C6_01740C_A	ATG15	orf19.3412	0.215388	0.0504792
CAALFM_CR08420WA	CR_00070W_A	BNR1	orf19.7537	0.215316	0.0184114
CAALFM_C201850WA	C4_02920W_A		orf19.2703	0.21513	0.0654306
CAALFM_C206650CA	C1_08410C_A	SAM4	orf19.386	0.215095	0.0395578
CAALFM_C501310WA	CR_01720W_A		orf19.2565	0.214715	0.00891677
CAALFM_C105380CA	C1_04210C_A	CDC3	orf19.1055	0.214555	0.00830333
CAALFM_C702040CA	C2_03900C_A		orf19.835	0.214545	0.0275604
CAALFM_CR04150WA	C6_00710W_A		orf19.3658	0.214493	0.0226858
CAALFM_C204510WA	C1_07410C_A	SKP1	orf19.4427	0.214459	0.00381767
CAALFM_CR03770CA	C2_02840C_A		orf19.5821	0.214034	0.0166674
CAALFM_C104530CA	CR_06430W_A		orf19.725	0.213656	0.0662792
CAALFM_C303230CA	C3_05590C_A	BAT22	orf19.6994	0.213413	0.00738035
CAALFM_C102250WA	C4_07200C_A		orf19.3083	0.213055	0.0240905
CAALFM_C112000CA	C1_04720W_A		orf19.772.1	0.213016	0.0785454
CAALFM_C105400CA	C4_00850C_A		orf19.4707	0.212671	0.567328
CAALFM_C210620WA	C2_00260C_A	MUQ1	orf19.2107	0.212666	0.00261713
CAALFM_C303820CA	CR_09650W_A	WAL1	orf19.6598	0.212628	0.00650574
CAALFM_C701420WA	C2_07420W_A		orf19.1889	0.212598	0.0226918
CAALFM_C106380CA	C3_03850C_A	SOL1	orf19.6930	0.212553	0.0698069
CAALFM_C402780WA	C7_02670W_A		orf19.3697	0.212453	0.0215089
CAALFM_C106890CA	C6_04650W_A		orf19.2163	0.212432	0.00188264
CAALFM_C303550CA	C5_01960C_A		orf19.3175	0.212129	0.00590906
CAALFM_C403640CA	C1_03210C_A	CDC12	orf19.3013	0.211964	0.00546682
CAALFM_C504590CA	C3_01960C_A	POX1-3	orf19.1652	0.211773	0.0462533
CAALFM_CR00090CA	C3_05040C_A	ATG9	orf19.5974	0.211753	0.0876857
CAALFM_C113250WA	C6_02730W_A	SAC6	orf19.5544	0.211708	0.0159536
CAALFM_C103780CA	C1_10110W_A		orf19.4880	0.211578	0.162811
CAALFM_CR01430WA	C1_04400C_A	APE2	orf19.5197	0.21128	0.020712
CAALFM_C200210WA	C7_00580C_A		orf19.7061	0.211173	0.0754469
CAALFM_C106110CA	C6_04100W_A		orf19.1212	0.211107	0.00190441
CAALFM_CR08150WA	C2_05030C_A	RHO3	orf19.3534	0.210551	0.00750644
CAALFM_C503540CA	C2_09960W_A		orf19.1356	0.210428	0.0514941
CAALFM_C114410WA	C2_10790C_A		orf19.5363	0.210138	0.0480945
CAALFM_C604270WA	C5_02310C_A		orf19.4239	0.210036	0.091518
CAALFM_C404530CA	C3_02200W_A		orf19.1624.1	0.209777	0.496775
CAALFM_C303590WA	C1_11020W_A		orf19.2312	0.209552	0.0796003
CAALFM_CR06230WA	C2_03400C_A	DFG16	orf19.881	0.209402	0.0572632
CAALFM_C304670CA	C6_00310W_A		orf19.1191	0.209376	0.00403553
CAALFM_C101130WA	CR_10800C_A		orf19.7670	0.209335	0.00422011
CAALFM_C105720WA	C7_02830C_A	LIP5	orf19.5179	0.209193	0.113079
CAALFM_C106580WA	C2_06420C_A	RTS1	orf19.20	0.209148	0.0205076
CAALFM_C113750CA	C5_05030C_A	RIM13	orf19.3995	0.208875	0.150932
CAALFM_C103020CA	C1_10900C_A		NA	0.208479	0.701399
CAALFM_C502770WA	CR_08460W_A	TPM2	orf19.6414.3	0.208245	0.00833325
CAALFM_C500130CA	C3_03750C_A	ORC3	orf19.6942	0.207975	0.0126712
CAALFM_CR07600WA	C1_00070W_A	MVD	orf19.6105	0.207888	0.0328703
CAALFM_C503170CA	C2_10720C_A		orf19.5352	0.20783	0.0135874
CAALFM_CR07070CA	CR_09890C_A	BET2	orf19.7563	0.207011	0.0777795
CAALFM_C203810CA	C2_09620W_A		orf19.1392	0.206924	0.0102375
CAALFM_C503760CA	C2_01600C_A	CDC55	orf19.1468	0.206917	0.00795225
CAALFM_C306260CA	C1_11590W_A	PLD1	orf19.1161	0.206697	0.0144021
CAALFM_C602610CA	CR_06990W_A		orf19.2366	0.206695	0.82868
CAALFM_C112380CA	C2_02750C_A		orf19.5831	0.206605	0.59705
CAALFM_C305120CA	C1_02470W_A		orf19.2936	0.206477	0.226651
CAALFM_C703670WA	C1_07170C_A	ZCF23	orf19.4450	0.206423	0.13331
CAALFM_CR08360CA	C1_00530C_A		orf19.6055	0.206302	0.0387014
CAALFM_CR10660WA	C1_06200W_A		orf19.2663	0.206234	0.0751151
CAALFM_C307660WA	CR_04800W_A	MNT4	orf19.6313	0.206201	0.043191
CAALFM_C100370WA	C3_01260C_A		orf19.1725	0.206041	0.0398815
CAALFM_C110350CA	C4_05540W_A	HOM3	orf19.1235	0.206026	0.0697788
CAALFM_C505090WA	C2_01750C_A		orf19.1486	0.205927	0.0924249
CAALFM_CR09640CA	C1_10010C_A	SWE1	orf19.4867	0.205808	0.00522541
CAALFM_C404730WA	C7_01680C_A		orf19.6556	0.205731	0.075616
CAALFM_C207020CA	C1_02390W_A		orf19.2926	0.205725	0.0416899
CAALFM_C702550CA	C3_05000W_A	RDI1	orf19.5968	0.205609	0.00295136
CAALFM_C201860CA	C2_04610C_A	RPL17B	NA	0.20558	0.756108
CAALFM_C201240CA	CR_05290W_A	MNT3	orf19.1010	0.205496	0.0642828
CAALFM_C202580WA	CR_00510C_A	ADE1	orf19.7484	0.205434	0.0686279
CAALFM_C700840CA	C1_07970C_A	IRE1	orf19.5068	0.205301	0.0113977
CAALFM_CR05330WA	C5_01090C_A		orf19.1961	0.205015	0.0473355
CAALFM_C303770CA	CR_02200C_A	RAD51	orf19.3752	0.204929	0.00644279
CAALFM_C101850CA	C1_13220C_A	AKR1	orf19.4950	0.204862	0.0130163
CAALFM_CR10680WA	C1_10920W_A		orf19.2325	0.204827	0.0938014
CAALFM_C502650CA	C3_04750W_A		orf19.5935	0.204648	0.0986666
CAALFM_CR01190CA	C7_02170C_A		orf19.6498	0.204586	0.0625265
CAALFM_C200390CA	C1_14560C_A		orf19.7274	0.204345	0.0259249
CAALFM_C300500CA	C6_00080C_A		orf19.6329	0.2041	0.0480386
CAALFM_CR06520CA	C1_02050C_A	PHO91	orf19.3663	0.20394	0.0192367
CAALFM_C306970WA	C2_01040W_A		orf19.2018.1	0.203676	0.384326
CAALFM_C405860WA	C7_01180W_A		orf19.6900	0.203458	0.0294118
CAALFM_C700250CA	C2_09680W_A		orf19.1386	0.203076	0.0256128
CAALFM_C701280CA	C3_03180C_A	PNP1	orf19.317	0.202923	0.00870611
CAALFM_C704100CA	C5_04940W_A		orf19.3982	0.202499	0.459498
CAALFM_CR04920WA	C7_02300W_A	YPS7	orf19.6481	0.202476	0.0398532
CAALFM_C702510WA	C4_06130W_A		orf19.4715	0.202444	0.039923
CAALFM_C305560WA	C3_02070C_A		orf19.1639	0.20238	0.665184
CAALFM_C403800CA	C3_05850W_A		orf19.7365	0.202375	0.0642795
CAALFM_C400040WA	CR_07530C_A	ECM22	orf19.2623	0.202303	0.0701204
CAALFM_C202520WA	C4_01570C_A		NA	0.202148	0.711414
CAALFM_CR07510WA	C3_01660W_A		orf19.1678	0.201697	0.0256833
CAALFM_C201530CA	C5_04600C_A	GRR1	orf19.3944	0.201667	0.00675358
CAALFM_C601840CA	CR_08010W_A	DAD4	orf19.596.2	0.201635	0.0853832
CAALFM_C601340CA	C3_05790C_A		orf19.7360	0.201509	0.166429
CAALFM_C602020CA	C6_03520C_A		orf19.5718	0.201209	0.153473
CAALFM_CR02660CA	C3_04780C_A		orf19.5941	0.200778	0.0147031
CAALFM_C109180WA	C5_00090C_A		orf19.5688	0.200676	0.00682951
CAALFM_C101640WA	C1_07780W_A		orf19.4713	0.200473	0.0614728
CAALFM_CR10230WA	C3_00900C_A	AYR1	orf19.6167	0.200432	0.0162738
CAALFM_C406350CA	C1_05080W_A	GPT1	orf19.4063	0.200381	0.300061
CAALFM_C202490CA	CR_02510W_A		orf19.173	0.200167	0.0269481
CAALFM_CR10120CA	C1_08580C_A	VCX1	orf19.405	0.199948	0.0171512
CAALFM_C207310WA	C2_00550W_A		orf19.2072	0.199815	0.174783
CAALFM_C203870WA	CR_03620C_A		orf19.4380.1	0.199798	0.0365433
CAALFM_C202780CA	C6_00510C_A	RAD52	orf19.4208	0.199613	0.0382966
CAALFM_C304140CA	C2_01680C_A		orf19.1479	0.19947	0.0104249
CAALFM_C501910WA	C1_12920C_A		orf19.4922	0.199438	0.0391947
CAALFM_C700980WA	C2_03680W_A	SAP98	orf19.852	0.198742	0.148938
CAALFM_C703610CA	C6_03050C_A		orf19.5587	0.198435	0.0961945
CAALFM_C406690CA	C1_08150C_A		orf19.5092	0.198404	0.400258
CAALFM_C304620CA	C2_08590W_A	YWP1	orf19.3618	0.198329	0.142747
CAALFM_CR01000CA	C2_09650W_A		orf19.1389	0.198232	0.0137645
CAALFM_C501900CA	C1_02480W_A	PMM1	orf19.2937	0.198083	0.00242255
CAALFM_C703590CA	C2_00500W_A	ZCF9	orf19.2077	0.197945	0.055416
CAALFM_C201610CA	C6_03620C_A		orf19.5730	0.197916	0.045331
CAALFM_C203980CA	C6_00030W_A	TLO13	orf19.6337.1,	0.197311	0.0308985
CAALFM_C206750CA	C2_07860W_A		orf19.2196	0.197093	0.066943
CAALFM_C210100WA	C6_03370W_A		orf19.5626	0.196959	0.113429
CAALFM_C600800CA	C1_04870W_A	SAP7	orf19.756	0.19604	0.772136
CAALFM_CR03310CA	CR_02500W_A		orf19.175	0.195674	0.0562333
CAALFM_C101210WA	C4_04140W_A		orf19.5295	0.195447	0.322724
CAALFM_C110130WA	C3_01360C_A	IRO1	orf19.1715	0.195442	0.0128233
CAALFM_C703910WA	C2_01550W_A	SMP2	orf19.1462	0.195383	0.0115469
CAALFM_C205610CA	C1_13350W_A	STP2	orf19.4961	0.195359	0.00449574
CAALFM_CR09760WA	C4_01950W_A		orf19.4597	0.195244	0.0122832
CAALFM_C204740CA	C1_03170C_A		orf19.3009	0.195226	0.184186
CAALFM_C111060CA	C7_03450C_A	HSM3	orf19.1331	0.195151	0.0748846
CAALFM_C604510CA	C3_01810C_A	MNT1	orf19.1665	0.195061	0.00568428
CAALFM_C404890CA	C2_07760W_A		orf19.2204	0.194601	0.191689
CAALFM_C201830WA	C3_07770C_A		orf19.6170	0.194458	0.0728669
CAALFM_C403300CA	C6_02720C_A		orf19.5543	0.194245	0.0367989
CAALFM_C208700CA	C4_04030W_A	JEN2	orf19.5307	0.194191	0.823301
CAALFM_C200110WA	CR_04070W_A	NAT5	orf19.490	0.193798	0.0126664
CAALFM_C503430WA	C2_04760W_A	KIC1	orf19.191	0.193782	0.0442527
CAALFM_C105790WA	C7_01930C_A		orf19.6528	0.193772	0.0308212
CAALFM_C502180CA	C1_08030W_A	PFY1	orf19.5076	0.193756	0.00857807
CAALFM_C406680CA	C3_06910C_A	TPD3	orf19.6810	0.193585	0.039057
CAALFM_C202130CA	C4_00370W_A	HOF1	orf19.5664	0.193193	0.0140985
CAALFM_C700620WA	CR_00760C_A	HYR4	orf19.3279	0.192768	0.0202809
CAALFM_C208040CA	C6_02540C_A		orf19.5523	0.192514	0.197312
CAALFM_CR07250CA	C1_03960C_A		orf19.4471	0.192273	0.0536263
CAALFM_C108980CA	C1_10290W_A	GCA1	orf19.4899	0.192253	0.100294
CAALFM_C503370CA	C7_02180C_A	TRS33	orf19.6496	0.192199	0.0762338
CAALFM_C603560WA	C3_04030C_A	PEX8	orf19.2805	0.19215	0.0802027
CAALFM_C702030WA	CR_06310W_A		orf19.3885	0.192142	0.617715
CAALFM_C603460WA	C1_14040W_A		orf19.7212	0.191868	0.0143776
CAALFM_C105340CA	C7_00150W_A		orf19.7108	0.191786	0.00595832
CAALFM_C501940WA	C6_01690W_A	ACF2	orf19.3417	0.191314	0.0281313
CAALFM_C210640CA	C1_02180W_A	GAL7	orf19.3675	0.19129	0.0541797
CAALFM_C208520CA	C1_02270C_A		orf19.3684	0.191266	0.289541
CAALFM_C702860CA	C3_03380W_A		orf19.335	0.191206	0.0391572
CAALFM_C405980CA	C4_03130W_A		orf19.2677	0.191135	0.0309807
CAALFM_C201930CA	C5_02840C_A	HSL1	orf19.4308	0.19088	0.062722
CAALFM_C109790CA	C2_00060C_A		orf19.1917	0.190738	0.0270396
CAALFM_C103930WA	C1_10000C_A	CPP1	orf19.4866	0.190514	0.018307
CAALFM_C701040CA	C3_03810W_A	RAD53	orf19.6936	0.190326	0.042582
CAALFM_C504340WA	C1_13760W_A	AGM1	orf19.5013	0.190214	0.0131202
CAALFM_CR01480WA	C4_02000C_A	RGA2	orf19.4593	0.189897	0.00841466
CAALFM_CR04100CA	CR_05070W_A	GLN1	NA	0.189887	0.904392
CAALFM_CR08930CA	C3_03690W_A		orf19.6950	0.189761	0.5189
CAALFM_C401660WA	C4_05450C_A	CBR1	orf19.1801	0.189402	0.019615
CAALFM_C208320CA	C7_01830W_A		orf19.6537	0.189281	0.127681
CAALFM_C106910CA	C3_06820C_A		orf19.6820	0.189246	0.0291362
CAALFM_C405180CA	C3_06200C_A	MMS21	orf19.7413	0.188929	0.0664047
CAALFM_C304250WA	C1_11390W_A		orf19.664	0.188822	0.720593
CAALFM_C405670WA	C1_11810W_A	CAS1	orf19.1135	0.18874	0.0309846
CAALFM_C600170CA	C4_02460W_A		orf19.2756	0.188411	0.0282113
CAALFM_CR03030CA	C3_04310C_A		orf19.5874	0.188259	0.734974
CAALFM_C602750CA	C7_00180W_A	FAR1	orf19.7105	0.188173	0.538165
CAALFM_C503160WA	C2_04040C_A	DCK2	orf19.816	0.18809	0.0462142
CAALFM_CR09510CA	C1_05820C_A	RAD10	orf19.2469	0.187917	0.143797
CAALFM_CR09310WA	C2_00330C_A	HIR1	orf19.2099	0.187379	0.0293628
CAALFM_C500150CA	CR_04890W_A	LYS5	orf19.6304	0.187303	0.188921
CAALFM_C700350CA	C2_03530W_A		orf19.867	0.187228	0.0348651
CAALFM_C501720CA	C5_03210C_A		orf19.2657	0.187192	0.179446
CAALFM_C111690WA	C2_08060W_A		orf19.2178.1	0.186987	0.155302
CAALFM_C602860WA	C2_05210W_A	DAD2	orf19.3551	0.186914	0.155231
CAALFM_C504640CA	C2_08750W_A		orf19.3600	0.186889	0.40161
CAALFM_C301340WA	C1_00800C_A	ERG2	orf19.6026	0.186637	0.0133009
CAALFM_C502530WA	C1_11140W_A		orf19.2302	0.186637	0.0483639
CAALFM_C305730CA	C5_00440C_A	VPS2	orf19.945	0.186633	0.0261758
CAALFM_C110650WA	C3_03990C_A	AAP1	orf19.2810	0.186597	0.436163
CAALFM_C105920WA	CR_06690C_A		orf19.703	0.186455	0.0386903
CAALFM_C300100WA	C2_07160W_A	SMF12	orf19.2270	0.186341	0.0212672
CAALFM_C502940CA	C5_01350W_A		orf19.1933	0.186214	0.0211213
CAALFM_C205040CA	C7_03370C_A		orf19.1338	0.186108	0.0201163
CAALFM_C303560WA	C4_06030W_A	CMD1	orf19.4413	0.18592	0.00810915
CAALFM_C501010WA	CR_00870C_A		orf19.3267	0.185335	0.328704
CAALFM_CR03640CA	C7_03940C_A	CLB4	orf19.7186	0.18527	0.0181536
CAALFM_C703380WA	C6_03030W_A	SAP5	orf19.5585	0.185111	0.0426061
CAALFM_C302420CA	C3_00110C_A	SEC6	orf19.5463	0.184897	0.0261173
CAALFM_C202810CA	C1_13330C_A		orf19.4960	0.184781	0.0119804
CAALFM_C600520WA	C6_00420W_A	DPM2	orf19.1203.1	0.184706	0.0131791
CAALFM_CR00150CA	C3_01900C_A		orf19.1656	0.184697	0.217812
CAALFM_CR06000WA	C7_03720C_A	HIS7	orf19.5505	0.184684	0.0475019
CAALFM_C113940WA	C6_01140C_A	ARC18	orf19.121	0.184224	0.0614448
CAALFM_C210250CA	C1_11520C_A	ZCF3	orf19.1168	0.184151	0.136372
CAALFM_CR03300CA	CR_04570C_A	CDC10	orf19.548	0.184126	0.0484746
CAALFM_C113780WA	C1_09380W_A	RIM20	orf19.4800	0.183822	0.0276545
CAALFM_C601050WA	CR_06900C_A	ALG6	orf19.1843	0.18367	0.0415154
CAALFM_C403790WA	C5_03770C_A		orf19.1117	0.183625	0.644589
CAALFM_C703390CA	C1_14580C_A		orf19.7275	0.18353	0.0705807
CAALFM_C105810WA	C3_06470W_A	AAF1	orf19.7436	0.183506	0.0478665
CAALFM_C206150CA	C7_00970C_A	YOX1	orf19.7017	0.183335	0.0900958
CAALFM_C110590WA	C1_06900C_A	MMD1	orf19.6220.3	0.183189	0.027117
CAALFM_C601320WA	C1_00120C_A	TRP1	orf19.6096	0.183155	0.0160167
CAALFM_C304500CA	CR_00350W_A		orf19.7499	0.183075	0.0618202
CAALFM_C401360WA	C5_01280C_A	NUF2	orf19.1941	0.182875	0.0751691
CAALFM_C106350WA	C2_00270C_A		orf19.2106	0.182645	0.0829779
CAALFM_C404190CA	C7_03300C_A	LIP8	orf19.1345	0.18251	0.119686
CAALFM_C210080WA	C2_09770C_A	INP51	orf19.1373	0.182108	0.0547485
CAALFM_C107420CA	CR_00690C_A		orf19.3286	0.18208	0.0575775
CAALFM_CR00050WA	C3_00630W_A		orf19.5395	0.182043	0.0777915
CAALFM_C113640WA	C2_00640W_A		orf19.2064	0.181892	0.0806742
CAALFM_CR08770WA	C7_00670C_A		orf19.7052	0.18164	0.0398237
CAALFM_CR05560WA	C1_10660W_A	TBP1	orf19.1837	0.181394	0.0099022
CAALFM_CR06600CA	CR_00660W_A		orf19.7463	0.181389	0.345765
CAALFM_C404910CA	C2_01640W_A	SLA1	orf19.1474	0.181108	0.0280291
CAALFM_C406600WA	C1_07050C_A		orf19.6199	0.180983	0.0685914
CAALFM_C601160WA	C1_12180C_A		orf19.5246	0.18096	0.0307355
CAALFM_CR01030WA	C2_10050W_A		orf19.1777	0.180721	0.034134
CAALFM_CR03020CA	C3_07820W_A		orf19.6177	0.180708	0.136029
CAALFM_C301110CA	C1_05320C_A		orf19.433	0.18038	0.0763995
CAALFM_C210190CA	C1_03760C_A	STR2	orf19.1033	0.180237	0.0227583
CAALFM_C110390CA	C1_09090C_A	ARG81	orf19.4766	0.180014	0.0244512
CAALFM_CR02590CA	C1_00190C_A		orf19.6084	0.17971	0.732228
CAALFM_C503110CA	C1_01810C_A	UGA2	orf19.4543	0.179554	0.0770037
CAALFM_C200200WA	C2_10840W_A	RDH54	orf19.5367	0.179496	0.0452444
CAALFM_C109540WA	C1_12830C_A		orf19.4913	0.179489	0.0374385
CAALFM_C210310CA	C2_05720C_A		orf19.6883	0.179336	0.0338166
CAALFM_C504610WA	C1_02410C_A		orf19.2928	0.179097	0.061015
CAALFM_C110440WA	C2_04440W_A		orf19.4508	0.179001	0.47741
CAALFM_C302440CA	C6_01960W_A		orf19.687	0.178414	0.0713326
CAALFM_C501190WA	CR_05700C_A		orf19.6642	0.178352	0.0233362
CAALFM_CR03060WA	C2_09840W_A	MTW1	orf19.1367	0.178346	0.244266
CAALFM_C206080CA	C5_01320W_A	SNF1	orf19.1936	0.178338	0.0370995
CAALFM_C300090WA	C1_13630W_A	CYB2	orf19.5000	0.178016	0.253138
CAALFM_C600320CA	C4_01980C_A	CLC1	orf19.4594	0.177987	0.0195977
CAALFM_C603940CA	C1_00570C_A		orf19.6049	0.177868	0.0305267
CAALFM_C204690CA	CR_01230C_A	CDC27	orf19.3231	0.177715	0.0559494
CAALFM_C113790CA	C3_01510W_A		orf19.1698	0.177562	0.0973451
CAALFM_C110760WA	C6_03820C_A		orf19.5757	0.177409	0.0622962
CAALFM_CR04790WA	C6_04150W_A		orf19.77.1	0.17715	0.90692
CAALFM_C107490CA	C7_01560C_A	NUP	orf19.6570	0.177145	0.28612
CAALFM_C500770CA	C6_01680C_A		orf19.3418	0.176975	0.456353
CAALFM_CR10820WA	CR_00560W_A	NTH1	orf19.7479	0.176815	0.0252738
CAALFM_C601390WA	C2_09270C_A	SGT1	orf19.4089	0.1765	0.0146041
CAALFM_C209720WA	C3_02080W_A		orf19.1638	0.176492	0.0547832
CAALFM_C307110WA	C4_02760C_A	CGR1	orf19.2722	0.176238	0.0721381
CAALFM_C402700WA	C2_07950W_A	SEH1	orf19.2186	0.175682	0.0500342
CAALFM_C404210CA	C1_12410C_A	PKH2	orf19.5224	0.175629	0.00962868
CAALFM_C600090WA	C4_00390W_A		orf19.5666	0.17559	0.0523733
CAALFM_C400060WA	C1_04810W_A	TCO89	orf19.761	0.175585	0.0537621
CAALFM_C305290CA	C3_01690W_A		orf19.1675	0.175451	0.0313221
CAALFM_C111360WA	C4_06120W_A	GDH3	orf19.4716	0.175347	0.346629
CAALFM_C206410WA	C2_10200W_A		orf19.1761	0.17525	0.0315035
CAALFM_C103620CA	C1_06120C_A		orf19.2433	0.175064	0.397949
CAALFM_C701510WA	C2_06740W_A		orf19.3148	0.175002	0.0339331
CAALFM_C304700WA	C6_00480C_A	FET31	orf19.4211	0.174895	0.188992
CAALFM_C202230CA	CR_01290C_A	CWH43	orf19.3225	0.174728	0.0471921
CAALFM_C112080WA	C4_02330C_A		orf19.2770	0.174427	0.188561
CAALFM_CR05650WA	C1_11960C_A		orf19.5269.1	0.174324	0.0568153
CAALFM_CR00240WA	C1_01420C_A	CRL1	orf19.3330	0.174022	0.0732016
CAALFM_C103980WA	CR_09750C_A		orf19.7547	0.173921	0.0438269
CAALFM_C603850CA	C5_02780W_A		orf19.4301	0.173919	0.0245664
CAALFM_C703640CA	C5_02790C_A	GAP1	orf19.4304	0.17362	0.0563784
CAALFM_C503690WA	C4_02280W_A	IDI1	orf19.2775	0.173605	0.0223586
CAALFM_C100180WA	C1_04340C_A		orf19.1070	0.173559	0.12847
CAALFM_C114270WA	C1_03480C_A	AGE1	orf19.3050	0.173506	0.0196825
CAALFM_C504220WA	CR_10780C_A	IAH1	orf19.7667	0.173422	0.110871
CAALFM_C600680CA	C1_00920W_A		orf19.6012	0.173192	0.10162
CAALFM_C203910CA	C2_08720W_A		orf19.3604	0.173142	0.0517123
CAALFM_CR09490WA	C6_00230W_A		orf19.1181	0.173071	0.187195
CAALFM_C504100WA	C1_12580W_A		orf19.3758	0.172935	0.105044
CAALFM_C407180WA	C3_06510C_A	HST6	orf19.7440	0.172886	0.602516
CAALFM_C102830WA	CR_02560C_A	ASG1	orf19.166	0.172475	0.0265725
CAALFM_C307280CA	C2_07460W_A	TAF4	orf19.1885	0.172322	0.0367339
CAALFM_C304710WA	C2_10350C_A	ACS1	orf19.1743	0.172188	0.0294308
CAALFM_C108820CA	C2_08170W_A		orf19.2168	0.17216	0.573358
CAALFM_C108510WA	C1_03140W_A		orf19.3007	0.172101	0.227523
CAALFM_C306120CA	C1_07620C_A	PIR32	orf19.2783	0.171799	0.731334
CAALFM_C101670CA	C5_03910C_A		orf19.1105	0.171686	0.534059
CAALFM_C405850CA	C1_09110W_A		orf19.4768	0.171475	0.182348
CAALFM_C407010CA	CR_00880W_A		orf19.3266	0.171377	0.0926285
CAALFM_C601380CA	C4_00590C_A		orf19.4184	0.171295	0.04324
CAALFM_C505380WA	C6_02310W_A		orf19.3473	0.170954	0.0660958
CAALFM_C503280WA	C2_09640W_A	PMI1	orf19.1390	0.170916	0.0129003
CAALFM_C105480CA	C6_01650C_A	FMP27	orf19.3422	0.170769	0.105278
CAALFM_C600340CA	C7_03490W_A	GYP7	orf19.6706	0.170547	0.131015
CAALFM_C101440CA	C4_00580W_A		orf19.4185	0.170409	0.107164
CAALFM_C400530CA	C1_10020W_A	SFU1	orf19.4869	0.1704	0.117037
CAALFM_C103440CA	C4_03020W_A		orf19.2690	0.170215	0.0233158
CAALFM_CR00830WA	C2_05780C_A	MKK2	orf19.6889	0.169931	0.0148912
CAALFM_C202600CA	CR_03800C_A	PPH3	orf19.4378	0.169352	0.145028
CAALFM_CR10490WA	C2_03390C_A	HSP78	orf19.882	0.169315	0.110509
CAALFM_CR02270CA	C4_04440W_A		orf19.3843	0.168824	0.0201048
CAALFM_C107130CA	C1_03130C_A	GGA2	orf19.3006	0.168663	0.0378133
CAALFM_C401310WA	CR_09960C_A	UGA3	orf19.7570	0.168537	0.0768475
CAALFM_CR07170WA	C4_01830C_A		orf19.4610	0.168478	0.0699906
CAALFM_CR02080WA	C6_04280W_A		orf19.1085	0.168454	0.0270662
CAALFM_C112690CA	C6_03020W_A	PEP3	orf19.5584	0.168425	0.157698
CAALFM_C210760CA	C6_00180C_A		orf19.1178	0.168355	0.54885
CAALFM_C306420CA	CR_02870W_A	APL4	orf19.2844	0.168275	0.101053
CAALFM_C504490CA	CR_04900C_A	PGA39	orf19.6302	0.168245	0.852941
CAALFM_CR06710CA	C2_02330W_A		CPR3/orf19.1552	0.168172	0.850002
CAALFM_CR03980WA	C2_02040W_A		orf19.1519	0.168078	0.0313078
CAALFM_C205640WA	C6_00910C_A		orf19.92	0.167448	0.0266348
CAALFM_CR08520CA	C6_03000C_A		orf19.5579	0.167395	0.182134
[truncated: 4,264 more rows]

## Sheet: C. albicans 60 min
Gene	CGD ID	Gene symbol	log2FC	pvalue
CAALFM_C100020CA	C1_00020C_A		0.434842	0.00062693
CAALFM_C100030CA	C1_00030C_A		0.231291	0.234728
CAALFM_C100040WA	C1_00040W_A	CTA2	0.164684	0.236301
CAALFM_C100060WA	C1_00060W_A	TUP1	0.115909	0.225674
CAALFM_C100070WA	C1_00070W_A	MVD	0.0127124	0.891627
CAALFM_C100080CA	C1_00080C_A	RCA1	0.0155709	0.868529
CAALFM_C100090WA	C1_00090W_A		0.143301	0.322086
CAALFM_C100100CA	C1_00100C_A		0.00442311	0.965063
CAALFM_C100110WA	C1_00110W_A	CCT8	-0.103559	0.300216
CAALFM_C100120CA	C1_00120C_A	TRP1	0.00476083	0.957196
CAALFM_C100130CA	C1_00130C_A	VPS53	-0.0613269	0.495154
CAALFM_C100140WA	C1_00140W_A	KEL1	0.0539382	0.561679
CAALFM_C100150CA	C1_00150C_A	RIM8	0.299032	0.0443825
CAALFM_C100160CA	C1_00160C_A		-0.584553	2.16e-12
CAALFM_C100170WA	C1_00170W_A	LEU4	0.253144	0.147455
CAALFM_C100180WA	C1_00180W_A	RPL16A	-0.153377	0.265411
CAALFM_C100190CA	C1_00190C_A		0.521042	0.258577
CAALFM_C100200CA	C1_00200C_A		0.110224	0.618386
CAALFM_C100210CA	C1_00210C_A		0.186565	0.0296881
CAALFM_C100220WA	C1_00220W_A	PHR2	0.0196955	0.821613
CAALFM_C100230CA	C1_00230C_A	BFA1	-0.138226	0.154712
CAALFM_C100240CA	C1_00240C_A	BFA1	-0.173724	0.864387
CAALFM_C100270WA	C1_00270W_A		0.298341	0.00088797
CAALFM_C100280CA	C1_00280C_A	RFC52	NA	NA
CAALFM_C100290WA	C1_00290W_A	POL93	0.227499	0.0158598
CAALFM_C100310WA	C1_00310W_A		0.268358	0.00669762
CAALFM_C100320WA	C1_00320W_A		0.0535718	0.599412
CAALFM_C100330CA	C1_00330C_A		0.0471409	0.687145
CAALFM_C100340WA	C1_00340W_A	HBR1	-0.0734872	0.478418
CAALFM_C100350CA	C1_00350C_A	HMX1	0.309478	0.108058
CAALFM_C100360WA	C1_00360W_A	CDC13	0.158254	0.155155
CAALFM_C100370WA	C1_00370W_A		0.0541834	0.815186
CAALFM_C100380CA	C1_00380C_A		-0.002982	0.973536
CAALFM_C100390WA	C1_00390W_A	ENA2	0.0216682	0.82428
CAALFM_C100400WA	C1_00400W_A	SVF1	0.0799849	0.474597
CAALFM_C100410CA	C1_00410C_A		-0.316826	0.00459688
CAALFM_C100420WA	C1_00420W_A		0.138992	0.103405
CAALFM_C100430WA	C1_00430W_A		0.165042	0.0880853
CAALFM_C100440WA	C1_00440W_A	UBP6	-0.126415	0.128948
CAALFM_C100450CA	C1_00450C_A		-0.307245	0.0846299
CAALFM_C100460WA	C1_00460W_A		-0.319356	0.0494379
CAALFM_C100470CA	C1_00470C_A		-0.0581955	0.632006
CAALFM_C100480CA	C1_00480C_A	GCN20	0.00939809	0.931146
CAALFM_C100490CA	C1_00490C_A	TTR1	-1.0426	1.4e-20
CAALFM_C100500CA	C1_00500C_A	GLO1	-0.12455	0.227357
CAALFM_C100510WA	C1_00510W_A		0.175251	0.0713231
CAALFM_C100520WA	C1_00520W_A		0.128704	0.227624
CAALFM_C100530CA	C1_00530C_A		0.0239854	0.792328
CAALFM_C100540CA	C1_00540C_A		-0.129128	0.166174
CAALFM_C100550WA	C1_00550W_A	CIS2	-0.25781	0.021905
CAALFM_C100560WA	C1_00560W_A	CNS1	-0.15495	0.190409
CAALFM_C100570CA	C1_00570C_A		0.100524	0.289876
CAALFM_C100580WA	C1_00580W_A		0.213049	0.0699311
CAALFM_C100590WA	C1_00590W_A	TUF1	-0.658907	0.00327495
CAALFM_C100600WA	C1_00600W_A	APC1	0.0505914	0.620266
CAALFM_C100610WA	C1_00610W_A	PSD1	0.0744438	0.44909
CAALFM_C100620WA	C1_00620W_A	MOB2	0.302547	0.00134473
CAALFM_C100630WA	C1_00630W_A		0.394395	0.00228791
CAALFM_C100640CA	C1_00640C_A	RPO41	-0.435057	0.00014585
CAALFM_C100650CA	C1_00650C_A	SNF7	-0.000892	0.992061
CAALFM_C100660CA	C1_00660C_A		0.144068	0.140005
CAALFM_C100670CA	C1_00670C_A	UGA32	0.178916	0.0847427
CAALFM_C100680WA	C1_00680W_A	ASM3	0.525511	4.15e-05
CAALFM_C100690WA	C1_00690W_A	RIC1	0.0143997	0.9035
CAALFM_C100700WA	C1_00700W_A		-0.0762427	0.6548
CAALFM_C100710CA	C1_00710C_A	TUB2	0.128285	0.179581
CAALFM_C100720WA	C1_00720W_A	TUB2	-0.369378	0.412241
CAALFM_C100730CA	C1_00730C_A	CMP1	0.147181	0.0948647
CAALFM_C100740CA	C1_00740C_A	SPE1	0.0142521	0.861786
CAALFM_C100750CA	C1_00750C_A	VPS27	-0.0218572	0.812617
CAALFM_C100760WA	C1_00760W_A		0.167765	0.127356
CAALFM_C100770CA	C1_00770C_A	ROT1	-0.0745764	0.529681
CAALFM_C100780CA	C1_00780C_A	HGC1	0.351816	0.00037349
CAALFM_C100790WA	C1_00790W_A		0.0821506	0.548761
CAALFM_C100800CA	C1_00800C_A	ERG2	0.243071	0.0587158
CAALFM_C100810WA	C1_00810W_A		0.336167	0.0185172
CAALFM_C100820WA	C1_00820W_A		0.247967	0.0583309
CAALFM_C100830WA	C1_00830W_A		0.569516	0.00210557
CAALFM_C100840CA	C1_00840C_A	NRM1	0.126234	0.203143
CAALFM_C100850WA	C1_00850W_A	IHD2	0.563336	4.01e-08
CAALFM_C100860WA	C1_00860W_A		-0.325703	0.0270935
CAALFM_C100870WA	C1_00870W_A	LRO1	0.189469	0.0650071
CAALFM_C100880WA	C1_00880W_A		0.00818378	0.975021
CAALFM_C100890WA	C1_00890W_A		0.129947	0.208909
CAALFM_C100900WA	C1_00900W_A	RRS1	-0.124191	0.334584
CAALFM_C100910WA	C1_00910W_A		0.183903	0.111059
CAALFM_C100920WA	C1_00920W_A		0.0910748	0.405251
CAALFM_C100930CA	C1_00930C_A	SIN3	0.0227073	0.787104
CAALFM_C100940WA	C1_00940W_A	RPB11	-0.152447	0.276955
CAALFM_C100950CA	C1_00950C_A	CDC5	0.101803	0.214165
CAALFM_C100960CA	C1_00960C_A	SET1	0.0140714	0.883001
CAALFM_C100970WA	C1_00970W_A		-0.0712665	0.639507
CAALFM_C100980WA	C1_00980W_A		-0.448525	0.0151269
CAALFM_C100990CA	C1_00990C_A	NMA111	-0.115246	0.247936
CAALFM_C101000CA	C1_01000C_A		0.0715595	0.549907
CAALFM_C101010WA	C1_01010W_A		-0.218802	0.169649
CAALFM_C101020WA	C1_01020W_A		0.121571	0.964096
CAALFM_C101030WA	C1_01030W_A	HMT1	-0.209087	0.0238231
CAALFM_C101040WA	C1_01040W_A		-0.260576	0.0118218
CAALFM_C101050CA	C1_01050C_A		0.0269381	0.774202
CAALFM_C101060WA	C1_01060W_A	MBF1	-0.184892	0.0713724
CAALFM_C101070CA	C1_01070C_A		0.0378143	0.737586
CAALFM_C101080WA	C1_01080W_A		0.0492192	0.662282
CAALFM_C101090CA	C1_01090C_A		-0.406936	0.0291185
CAALFM_C101100WA	C1_01100W_A	CCH1	0.00651876	0.944628
CAALFM_C101110CA	C1_01110C_A	ZPR1	-0.373927	0.00118831
CAALFM_C101130WA	C1_01130W_A		0.086997	0.43044
CAALFM_C101140CA	C1_01140C_A		-0.190602	0.100006
CAALFM_C101150CA	C1_01150C_A		-0.16001	0.184176
CAALFM_C101160CA	C1_01160C_A		-0.0500578	0.675999
CAALFM_C101170CA	C1_01170C_A	ZCF17	-0.0525653	0.605736
CAALFM_C101180CA	C1_01180C_A		-0.311127	0.251463
CAALFM_C101190CA	C1_01190C_A		-0.0115024	0.915689
CAALFM_C101200WA	C1_01200W_A	STB5	-0.054595	0.63516
CAALFM_C101210WA	C1_01210W_A		0.0041521	0.970919
CAALFM_C101220CA	C1_01220C_A		0.23532	0.340483
CAALFM_C101240WA	C1_01240W_A	IFD3	0.0139054	0.912374
CAALFM_C101250WA	C1_01250W_A		-0.226019	0.0608708
CAALFM_C101260CA	C1_01260C_A	TRS20	0.0336478	0.809899
CAALFM_C101270WA	C1_01270W_A	CTA9	0.0513058	0.653046
CAALFM_C101280CA	C1_01280C_A	MED22	0.0489676	0.74196
CAALFM_C101290CA	C1_01290C_A		0.318772	0.00316126
CAALFM_C101300WA	C1_01300W_A		-0.0370427	0.667125
CAALFM_C101320WA	C1_01320W_A	MRS7	-0.217103	0.0282669
CAALFM_C101330CA	C1_01330C_A	DUT1	0.0287028	0.793592
CAALFM_C101340CA	C1_01340C_A		0.116671	0.326238
CAALFM_C101350CA	C1_01350C_A	TIF	-0.181432	0.110563
CAALFM_C101360CA	C1_01360C_A		0.159632	0.148047
CAALFM_C101370CA	C1_01370C_A	RPS21B	-0.221014	0.173507
CAALFM_C101380CA	C1_01380C_A	TRM2	-0.185859	0.122992
CAALFM_C101390CA	C1_01390C_A		-0.0527816	0.567176
CAALFM_C101400CA	C1_01400C_A		0.142533	0.124499
CAALFM_C101420CA	C1_01420C_A	CRL1	0.0842871	0.464296
CAALFM_C101440CA	C1_01440C_A	POX18	-0.148886	0.681065
CAALFM_C101450WA	C1_01450W_A	ABC1	-0.0835977	0.354529
CAALFM_C101460WA	C1_01460W_A		0.219476	0.0261145
CAALFM_C101470WA	C1_01470W_A		-0.0553029	0.539835
CAALFM_C101480CA	C1_01480C_A	RPS21	-0.25539	0.110995
CAALFM_C101490WA	C1_01490W_A		-0.268198	0.0394017
CAALFM_C101510WA	C1_01510W_A		0.386037	0.0451379
CAALFM_C101520CA	C1_01520C_A	SOD2	-0.761931	1.74e-08
CAALFM_C101530CA	C1_01530C_A		-0.171687	0.045344
CAALFM_C101540WA	C1_01540W_A		-0.0029995	0.976391
CAALFM_C101550WA	C1_01550W_A	VPS17	0.0182712	0.841035
CAALFM_C101560WA	C1_01560W_A	SIZ1	0.0735621	0.382568
CAALFM_C101570CA	C1_01570C_A	RPB7	-0.113847	0.306399
CAALFM_C101580WA	C1_01580W_A		-0.47362	0.0188417
CAALFM_C101590CA	C1_01590C_A		-0.130947	0.136822
CAALFM_C101600WA	C1_01600W_A	MRP20	-0.434981	0.0277097
CAALFM_C101610CA	C1_01610C_A		0.119728	0.613544
CAALFM_C101620CA	C1_01620C_A		0.398263	0.00755648
CAALFM_C101630WA	C1_01630W_A		0.191038	0.131605
CAALFM_C101640WA	C1_01640W_A	RPS42	-0.460151	0.00161234
CAALFM_C101650WA	C1_01650W_A	ISN1	0.217422	0.0452294
CAALFM_C101660CA	C1_01660C_A	ISN1	0.114846	0.955031
CAALFM_C101670CA	C1_01670C_A	ESP1	-0.105064	0.304255
CAALFM_C101680CA	C1_01680C_A		-0.433015	0.00868338
CAALFM_C101690CA	C1_01690C_A	LSC1	0.0209148	0.797049
CAALFM_C101700WA	C1_01700W_A	ARP8	0.134474	0.210234
CAALFM_C101710WA	C1_01710W_A		0.0444884	0.669027
CAALFM_C101720CA	C1_01720C_A		-0.191551	0.237811
CAALFM_C101730WA	C1_01730W_A		1.57616	0.752371
CAALFM_C101740WA	C1_01740W_A	CTN1	0.133109	0.683027
CAALFM_C101750WA	C1_01750W_A		-0.255708	0.0189828
CAALFM_C101760WA	C1_01760W_A	FGR38	0.160589	0.14913
CAALFM_C101770WA	C1_01770W_A	MAK32	0.068576	0.564727
CAALFM_C101780CA	C1_01780C_A	HOL4	0.281056	0.0375213
CAALFM_C101790WA	C1_01790W_A	SWI4	0.0557537	0.553296
CAALFM_C101800WA	C1_01800W_A		0.0321015	0.79116
CAALFM_C101810CA	C1_01810C_A	UGA2	-0.0801798	0.512872
CAALFM_C101820CA	C1_01820C_A		-0.0771174	0.551353
CAALFM_C101830CA	C1_01830C_A	UBC8	0.0399356	0.702469
CAALFM_C101840CA	C1_01840C_A		0.196017	0.0495181
CAALFM_C101850CA	C1_01850C_A		-0.0103443	0.939298
CAALFM_C101860WA	C1_01860W_A		-0.18775	0.0756578
CAALFM_C101870CA	C1_01870C_A	CYS4	-0.08975	0.365077
CAALFM_C101880CA	C1_01880C_A	PTR3	-0.0114895	0.919049
CAALFM_C101890CA	C1_01890C_A		-0.0263475	0.814253
CAALFM_C101900CA	C1_01900C_A		-0.0076717	0.93996
CAALFM_C101910WA	C1_01910W_A		-0.339972	0.00140954
CAALFM_C101920WA	C1_01920W_A	ROA1	-0.851247	3.41e-19
CAALFM_C101930WA	C1_01930W_A		0.1564	0.258139
CAALFM_C101940CA	C1_01940C_A		0.0104069	0.932009
CAALFM_C101950CA	C1_01950C_A		0.0102876	0.931204
CAALFM_C101970WA	C1_01970W_A		0.122568	0.970098
CAALFM_C101980WA	C1_01980W_A	HGT1	0.578019	0.00051805
CAALFM_C101990WA	C1_01990W_A	HSP30	-1.02031	0.220519
CAALFM_C102000WA	C1_02000W_A		-0.0860569	0.348626
CAALFM_C102010CA	C1_02010C_A	ZCF24	0.0901278	0.450517
CAALFM_C102020WA	C1_02020W_A		0.0668659	0.643823
CAALFM_C102030CA	C1_02030C_A		0.0275856	0.833732
CAALFM_C102040CA	C1_02040C_A		-0.420105	0.00074719
CAALFM_C102050CA	C1_02050C_A	PHO91	0.218004	0.0635558
CAALFM_C102060WA	C1_02060W_A		0.308142	0.00422586
CAALFM_C102070WA	C1_02070W_A	HSP31	0.27683	0.649961
CAALFM_C102080WA	C1_02080W_A	SET6	0.0166326	0.901699
CAALFM_C102090CA	C1_02090C_A		0.100641	0.388663
CAALFM_C102100WA	C1_02100W_A		0.143401	0.242193
CAALFM_C102110CA	C1_02110C_A	HGT2	-0.0823449	0.652986
CAALFM_C102120CA	C1_02120C_A	SHA3	-0.151108	0.31772
CAALFM_C102130CA	C1_02130C_A	GAL1	0.478837	0.0425003
CAALFM_C102150WA	C1_02150W_A	GAL10	0.555112	0.0174573
CAALFM_C102160WA	C1_02160W_A		0.0332142	0.795161
CAALFM_C102170CA	C1_02170C_A	GAL102	0.225749	0.28916
CAALFM_C102180WA	C1_02180W_A	GAL7	0.224915	0.152636
CAALFM_C102190WA	C1_02190W_A	ABP140	-0.26458	0.0222213
CAALFM_C102200CA	C1_02200C_A		-0.10459	0.438537
CAALFM_C102210WA	C1_02210W_A		0.119393	0.278288
CAALFM_C102220CA	C1_02220C_A		0.208698	0.234291
CAALFM_C102230WA	C1_02230W_A	2024-09-07	0.122538	0.24156
CAALFM_C102240WA	C1_02240W_A		-0.0161145	0.855867
CAALFM_C102250WA	C1_02250W_A	CWH8	-0.0022726	0.984314
CAALFM_C102260CA	C1_02260C_A	AGE3	0.0390989	0.683462
CAALFM_C102270CA	C1_02270C_A		0.663708	0.00100729
CAALFM_C102280CA	C1_02280C_A	PSY2	-0.108407	0.319465
CAALFM_C102290CA	C1_02290C_A		-0.179776	0.191267
CAALFM_C102300WA	C1_02300W_A		-0.174586	0.321907
CAALFM_C102310CA	C1_02310C_A		0.170715	0.195996
CAALFM_C102320CA	C1_02320C_A		-0.112684	0.25712
CAALFM_C102330CA	C1_02330C_A		-0.251146	0.106589
CAALFM_C102340CA	C1_02340C_A		-0.195541	0.589324
CAALFM_C102350WA	C1_02350W_A	TIM21	-0.340231	0.0585868
CAALFM_C102360CA	C1_02360C_A	PGA5	-0.156531	0.5191
CAALFM_C102370CA	C1_02370C_A		0.0854662	0.448439
CAALFM_C102380CA	C1_02380C_A		0.0399569	0.780356
CAALFM_C102390WA	C1_02390W_A		-0.0583613	0.560829
CAALFM_C102400CA	C1_02400C_A	MNN11	-0.0908782	0.428978
CAALFM_C102410CA	C1_02410C_A		-0.0850937	0.35411
CAALFM_C102420CA	C1_02420C_A	GSC1	-0.115552	0.169228
CAALFM_C102430CA	C1_02430C_A		-0.111577	0.251732
CAALFM_C102440CA	C1_02440C_A		-0.0079678	0.943423
CAALFM_C102450CA	C1_02450C_A		-0.360959	0.00399493
CAALFM_C102460WA	C1_02460W_A	RPL10	-0.481215	0.0009237
CAALFM_C102470WA	C1_02470W_A		-0.0097739	0.952279
CAALFM_C102480WA	C1_02480W_A	PMM1	0.218676	0.0214555
CAALFM_C102490CA	C1_02490C_A		-0.166823	0.305729
CAALFM_C102500WA	C1_02500W_A		0.102625	0.545266
CAALFM_C102510WA	C1_02510W_A		0.0842429	0.550266
CAALFM_C102520WA	C1_02520W_A	SCW4	-0.535376	0.592659
CAALFM_C102530CA	C1_02530C_A	DIP5	0.351937	0.0160883
CAALFM_C102540CA	C1_02540C_A	DIP5	0.511017	2.96e-08
CAALFM_C102570CA	C1_02570C_A	PUT4	0.290212	0.12314
CAALFM_C102580WA	C1_02580W_A	HNM4	0.441136	0.11646
CAALFM_C102590CA	C1_02590C_A	SNZ1	1.20513	3.09e-09
CAALFM_C102600WA	C1_02600W_A	SNO1	0.850898	2.69e-12
CAALFM_C102610WA	C1_02610W_A	IML1	0.0601633	0.488135
CAALFM_C102620CA	C1_02620C_A	HOM6	0.244723	0.0114243
CAALFM_C102630CA	C1_02630C_A	EXG2	0.170853	0.0667065
CAALFM_C102640CA	C1_02640C_A	TOM20	-0.317125	0.0693629
CAALFM_C102650WA	C1_02650W_A		-0.151171	0.40181
CAALFM_C102660CA	C1_02660C_A	MGM101	-0.288543	0.0784505
CAALFM_C102670CA	C1_02670C_A		0.473411	0.371403
CAALFM_C102680CA	C1_02680C_A		0.201822	0.0666342
CAALFM_C102690CA	C1_02690C_A		0.485614	0.719712
CAALFM_C102700CA	C1_02700C_A		0.597807	0.00022238
CAALFM_C102710WA	C1_02710W_A	FRS2	-0.0335923	0.748965
CAALFM_C102720WA	C1_02720W_A		-0.0485499	0.624004
CAALFM_C102730WA	C1_02730W_A		0.142433	0.358092
CAALFM_C102740CA	C1_02740C_A		0.120666	0.309777
CAALFM_C102750CA	C1_02750C_A		-0.0148884	0.865952
CAALFM_C102760WA	C1_02760W_A		0.0469179	0.604277
CAALFM_C102770WA	C1_02770W_A		-0.0506064	0.62196
CAALFM_C102780WA	C1_02780W_A		0.220568	0.0965126
CAALFM_C102790WA	C1_02790W_A	TIF34	-0.122617	0.227963
CAALFM_C102800WA	C1_02800W_A		0.38382	0.259286
CAALFM_C102810WA	C1_02810W_A	RAD16	-0.160687	0.0796928
CAALFM_C102820WA	C1_02820W_A	LYS2	0.239958	0.00480592
CAALFM_C102830WA	C1_02830W_A		-0.176675	0.0759182
CAALFM_C102840WA	C1_02840W_A	PDE2	-0.229599	0.0168595
CAALFM_C102850WA	C1_02850W_A		-0.0418902	0.643047
CAALFM_C102860CA	C1_02860C_A	YKT6	0.341455	7.54e-05
CAALFM_C102870WA	C1_02870W_A	YPT7	0.156663	0.205417
CAALFM_C102880CA	C1_02880C_A	MIA40	-0.72903	5.02e-07
CAALFM_C102890CA	C1_02890C_A		-0.400941	0.00125308
CAALFM_C102900CA	C1_02900C_A		0.0079309	0.940165
CAALFM_C102910CA	C1_02910C_A		0.0480684	0.67105
CAALFM_C102920WA	C1_02920W_A	CDC73	0.0216931	0.819698
CAALFM_C102930CA	C1_02930C_A	MST1	-0.453624	0.00188838
CAALFM_C102940CA	C1_02940C_A		0.0310786	0.761448
CAALFM_C102950WA	C1_02950W_A		-0.0795147	0.685903
CAALFM_C102960CA	C1_02960C_A		0.0107923	0.901989
CAALFM_C102970WA	C1_02970W_A		0.221142	0.00672931
CAALFM_C102980WA	C1_02980W_A	GOR1	0.068456	0.4608
CAALFM_C102990CA	C1_02990C_A	XOG1	0.196947	0.348946
CAALFM_C103000WA	C1_03000W_A	HOL1	-0.125991	0.481967
CAALFM_C103010WA	C1_03010W_A	RPP1A	-0.245399	0.148164
CAALFM_C103020CA	C1_03020C_A	RPL13	-0.18611	0.208416
CAALFM_C103030WA	C1_03030W_A	RPS16A	-0.183664	0.219015
CAALFM_C103040WA	C1_03040W_A		0.0426804	0.714042
CAALFM_C103050WA	C1_03050W_A		0.0691357	0.452575
CAALFM_C103060CA	C1_03060C_A	TSR2	-0.428399	5.26e-05
CAALFM_C103070CA	C1_03070C_A	ORC1	-0.0150489	0.881944
CAALFM_C103080CA	C1_03080C_A	TEM1	0.12835	0.373506
CAALFM_C103090WA	C1_03090W_A	RPS1	-0.200704	0.168023
CAALFM_C103100WA	C1_03100W_A		0.140905	0.137331
CAALFM_C103110WA	C1_03110W_A	RPL6	-0.178875	0.252658
CAALFM_C103120WA	C1_03120W_A		0.0384717	0.735757
CAALFM_C103130CA	C1_03130C_A	GGA2	0.0692613	0.412931
CAALFM_C103140WA	C1_03140W_A		-0.113811	0.497834
CAALFM_C103150CA	C1_03150C_A		0.141694	0.218293
CAALFM_C103160CA	C1_03160C_A	COQ4	0.0737728	0.447977
CAALFM_C103170CA	C1_03170C_A		0.211668	0.166546
CAALFM_C103180WA	C1_03180W_A		0.0782748	0.556714
CAALFM_C103190CA	C1_03190C_A	ECM33	0.099294	0.227402
CAALFM_C103200CA	C1_03200C_A	ARO80	-0.141512	0.123516
CAALFM_C103210CA	C1_03210C_A	CDC12	0.234217	0.00599911
CAALFM_C103220CA	C1_03220C_A	BMH1	0.0799209	0.353435
CAALFM_C103230CA	C1_03230C_A	ARX1	-0.411616	0.00018908
CAALFM_C103240WA	C1_03240W_A		-0.0320113	0.758378
CAALFM_C103250CA	C1_03250C_A	SPP1	-0.0348733	0.743747
CAALFM_C103260WA	C1_03260W_A		-0.0127421	0.920359
CAALFM_C103270WA	C1_03270W_A		-0.16909	0.296587
CAALFM_C103280WA	C1_03280W_A		-0.411316	0.0100741
CAALFM_C103290WA	C1_03290W_A	NGG1	-0.0374624	0.711217
CAALFM_C103300CA	C1_03300C_A	MAS1	-0.713775	3.37e-07
CAALFM_C103310WA	C1_03310W_A		0.0293583	0.749223
CAALFM_C103320CA	C1_03320C_A	EHD3	0.148087	0.241193
CAALFM_C103330CA	C1_03330C_A		0.0112454	0.925061
CAALFM_C103340CA	C1_03340C_A	SEC62	0.135605	0.251756
CAALFM_C103350CA	C1_03350C_A	RLI1	-0.181821	0.104375
CAALFM_C103360WA	C1_03360W_A		0.0338075	0.711691
CAALFM_C103370WA	C1_03370W_A		-0.50219	9.27e-06
CAALFM_C103380WA	C1_03380W_A	TPS2	0.0243191	0.853262
CAALFM_C103390WA	C1_03390W_A	EHT1	-0.169814	0.111267
CAALFM_C103400WA	C1_03400W_A		0.131828	0.198101
CAALFM_C103410WA	C1_03410W_A		-0.0539001	0.703101
CAALFM_C103420WA	C1_03420W_A		-0.800819	0.273638
CAALFM_C103430WA	C1_03430W_A		-0.0696617	0.536219
CAALFM_C103440CA	C1_03440C_A		-0.033057	0.730538
CAALFM_C103450CA	C1_03450C_A		-0.0004989	0.996134
CAALFM_C103460CA	C1_03460C_A		-0.403086	0.00166146
CAALFM_C103470CA	C1_03470C_A		-0.877952	0.124778
CAALFM_C103480CA	C1_03480C_A	AGE1	0.19118	0.0280628
CAALFM_C103490WA	C1_03490W_A		0.228203	0.0138168
CAALFM_C103500WA	C1_03500W_A	YPT1	0.161932	0.0588285
CAALFM_C103510CA	C1_03510C_A		0.0230885	0.805237
CAALFM_C103520WA	C1_03520W_A	RPN3	-0.146657	0.0856106
CAALFM_C103530WA	C1_03530W_A	MED17	-0.0592561	0.54047
CAALFM_C103540CA	C1_03540C_A		-0.0907885	0.487165
CAALFM_C103550CA	C1_03550C_A	COQ6	0.278906	0.0143121
CAALFM_C103560CA	C1_03560C_A	SUA71	-0.371289	0.00013195
CAALFM_C103570CA	C1_03570C_A	SUA71	-0.512207	0.628916
CAALFM_C103580WA	C1_03580W_A		3.14514	0.356613
CAALFM_C103600WA	C1_03600W_A		0.208892	0.0305224
CAALFM_C103610CA	C1_03610C_A	IMP1	0.0227198	0.879757
CAALFM_C103620CA	C1_03620C_A		-0.024468	0.779338
CAALFM_C103630WA	C1_03630W_A		0.0171529	0.87253
CAALFM_C103640CA	C1_03640C_A	HFL1	0.0248243	0.826253
CAALFM_C103650CA	C1_03650C_A	MRPL27	-0.43648	0.00522997
CAALFM_C103660WA	C1_03660W_A		-0.0005494	0.997124
CAALFM_C103670CA	C1_03670C_A	DAO1	0.12989	0.202059
CAALFM_C103680WA	C1_03680W_A	ENG1	0.0708573	0.514041
CAALFM_C103690WA	C1_03690W_A		0.0793213	0.40477
CAALFM_C103700CA	C1_03700C_A		0.102755	0.962828
CAALFM_C103710CA	C1_03710C_A	MSB1	0.0974663	0.257371
CAALFM_C103720CA	C1_03720C_A		-0.0515363	0.609484
CAALFM_C103730CA	C1_03730C_A	MNS1	0.158904	0.102655
CAALFM_C103740WA	C1_03740W_A	WAR1	-0.0273689	0.821639
CAALFM_C103750WA	C1_03750W_A		-0.0085058	0.925176
CAALFM_C103760CA	C1_03760C_A	STR2	0.0629623	0.541413
CAALFM_C103770WA	C1_03770W_A	SKO1	-0.143633	0.138691
CAALFM_C103780CA	C1_03780C_A	HMG1	-0.144112	0.17499
CAALFM_C103790CA	C1_03790C_A		-0.476475	0.00018087
CAALFM_C103800WA	C1_03800W_A	RPP1	0.0989146	0.554558
CAALFM_C103810CA	C1_03810C_A	ELA1	0.0818703	0.551437
CAALFM_C103820WA	C1_03820W_A	PDR16	-1.09528	1.09e-28
CAALFM_C103830CA	C1_03830C_A		0.00578103	0.955034
CAALFM_C103840WA	C1_03840W_A		-0.0156474	0.930326
CAALFM_C103860CA	C1_03860C_A	BNI4	0.126341	0.15047
CAALFM_C103870CA	C1_03870C_A		0.482277	3.79e-08
CAALFM_C103880CA	C1_03880C_A		-1.19223	0.559398
CAALFM_C103890WA	C1_03890W_A		-0.427033	0.634631
CAALFM_C103900WA	C1_03900W_A	SEN15	0.00835098	0.960089
CAALFM_C103910CA	C1_03910C_A		-0.193314	0.091735
CAALFM_C103920CA	C1_03920C_A		-0.0495467	0.740768
CAALFM_C103930WA	C1_03930W_A		-0.293596	0.0770308
CAALFM_C103940WA	C1_03940W_A		-0.174476	0.337777
CAALFM_C103950CA	C1_03950C_A		-0.0285339	0.848341
CAALFM_C103960CA	C1_03960C_A		0.0585403	0.544121
CAALFM_C103980WA	C1_03980W_A	SPC19	-0.225379	0.146209
CAALFM_C103990WA	C1_03990W_A		-0.697318	1.64e-10
CAALFM_C104000CA	C1_04000C_A	KTR4	-0.109243	0.346345
CAALFM_C104010CA	C1_04010C_A		-3.5411	1.9e-98
CAALFM_C104020CA	C1_04020C_A	CSH1	-1.41794	2.35e-18
CAALFM_C104030WA	C1_04030W_A		-0.571288	0.0001018
CAALFM_C104040CA	C1_04040C_A		-0.24202	0.0633522
CAALFM_C104050CA	C1_04050C_A	MFALPHA	0.122243	0.976543
CAALFM_C104060WA	C1_04060W_A	IFI3	-0.0802232	0.609534
CAALFM_C104070CA	C1_04070C_A	BET4	0.0691101	0.509561
CAALFM_C104080WA	C1_04080W_A	MAD2	0.0379005	0.836776
CAALFM_C104090CA	C1_04090C_A		0.09653	0.40945
CAALFM_C104100CA	C1_04100C_A	POR1	0.151627	0.0787296
CAALFM_C104110WA	C1_04110W_A		-0.0818112	0.493332
CAALFM_C104120CA	C1_04120C_A		-0.0333836	0.787009
CAALFM_C104130WA	C1_04130W_A	ERB1	-0.243807	0.00533854
CAALFM_C104140WA	C1_04140W_A	IFD6	-3.86757	4.62e-54
CAALFM_C104150CA	C1_04150C_A		-0.0706629	0.693529
CAALFM_C104160CA	C1_04160C_A		-0.181463	0.155878
CAALFM_C104170CA	C1_04170C_A	HTA2	-0.0577018	0.565582
CAALFM_C104180WA	C1_04180W_A		-0.0482803	0.618237
CAALFM_C104190CA	C1_04190C_A		0.0462417	0.656535
CAALFM_C104200CA	C1_04200C_A		0.0122677	0.88886
CAALFM_C104210CA	C1_04210C_A	CDC3	0.175781	0.0419415
CAALFM_C104220CA	C1_04220C_A		0.0404786	0.666589
CAALFM_C104230WA	C1_04230W_A		-0.0762154	0.368698
CAALFM_C104240CA	C1_04240C_A	HHF1	0.0207826	0.809597
CAALFM_C104260WA	C1_04260W_A	HHT21	-0.10635	0.302095
CAALFM_C104270CA	C1_04270C_A		0.328622	0.416805
CAALFM_C104280CA	C1_04280C_A		0.223827	0.0592144
CAALFM_C104290CA	C1_04290C_A	ACS2	-0.0603873	0.556051
CAALFM_C104300CA	C1_04300C_A	SSA2	-0.260219	0.153886
CAALFM_C104310CA	C1_04310C_A	GIG1	-0.0728033	0.680998
CAALFM_C104320WA	C1_04320W_A	GPM2	-0.108428	0.229688
CAALFM_C104330WA	C1_04330W_A	RPN4	-0.594735	4.9e-06
CAALFM_C104340CA	C1_04340C_A		0.0724438	0.580851
CAALFM_C104350CA	C1_04350C_A		0.37656	0.030299
CAALFM_C104360CA	C1_04360C_A		-0.21513	0.213085
CAALFM_C104370CA	C1_04370C_A		-0.417341	0.0114784
CAALFM_C104380WA	C1_04380W_A	SIT4	0.0277665	0.766617
CAALFM_C104390CA	C1_04390C_A	NOP4	-0.185568	0.143769
CAALFM_C104400CA	C1_04400C_A	APE2	0.111212	0.189091
CAALFM_C104410CA	C1_04410C_A	ESS1	-0.173586	0.071947
CAALFM_C104420CA	C1_04420C_A	URA6	0.0589723	0.555281
CAALFM_C104430CA	C1_04430C_A		0.12161	0.296333
CAALFM_C104440WA	C1_04440W_A		NA	NA
CAALFM_C104450CA	C1_04450C_A	FMA1	0.125921	0.23985
CAALFM_C104460CA	C1_04460C_A		0.0498408	0.758922
CAALFM_C104470CA	C1_04470C_A		0.695983	1.44e-05
CAALFM_C104480CA	C1_04480C_A	TUS1	0.104757	0.245122
CAALFM_C104490WA	C1_04490W_A		-0.0530242	0.580659
CAALFM_C104500WA	C1_04500W_A	ICL1	0.290627	0.118027
CAALFM_C104510WA	C1_04510W_A		0.174434	0.248322
CAALFM_C104520CA	C1_04520C_A	PHO85	0.0851847	0.432741
CAALFM_C104530CA	C1_04530C_A		-0.103245	0.343883
CAALFM_C104540CA	C1_04540C_A	VPS16	0.0540112	0.567647
CAALFM_C104550WA	C1_04550W_A	ELC1	0.064671	0.630881
CAALFM_C104560WA	C1_04560W_A		0.130631	0.228126
CAALFM_C104570CA	C1_04570C_A	CHL4	-0.205094	0.149066
CAALFM_C104580CA	C1_04580C_A		0.329303	0.0130278
CAALFM_C104590WA	C1_04590W_A		-0.0891626	0.443673
CAALFM_C104600CA	C1_04600C_A		-0.427471	0.0116962
CAALFM_C104610WA	C1_04610W_A	ATP1	-0.221836	0.144616
CAALFM_C104620WA	C1_04620W_A		0.191782	0.0828372
CAALFM_C104630CA	C1_04630C_A		0.0593217	0.524453
CAALFM_C104640WA	C1_04640W_A		-0.0814872	0.496128
CAALFM_C104650WA	C1_04650W_A	DUR3	-0.0601194	0.866176
CAALFM_C104660WA	C1_04660W_A	DUR1,2	-0.243891	0.178213
CAALFM_C104670WA	C1_04670W_A	HAT1	0.0344714	0.728053
CAALFM_C104680WA	C1_04680W_A	PIL1	0.20019	0.116422
CAALFM_C104690CA	C1_04690C_A		-0.863038	0.0533603
CAALFM_C104700CA	C1_04700C_A		0.0240998	0.874232
CAALFM_C104710CA	C1_04710C_A		0.089388	0.484049
CAALFM_C104720WA	C1_04720W_A		0.2162	0.0666799
CAALFM_C104730CA	C1_04730C_A	LYS21	-0.0909273	0.391137
CAALFM_C104740WA	C1_04740W_A	LPG20	-0.0805114	0.697275
CAALFM_C104750WA	C1_04750W_A	IFE1	0.00092093	0.996959
CAALFM_C104760CA	C1_04760C_A	SYG1	0.12185	0.256538
CAALFM_C104770CA	C1_04770C_A	ERG3	0.750373	7.89e-09
CAALFM_C104780CA	C1_04780C_A		0.169558	0.0692692
CAALFM_C104790WA	C1_04790W_A		0.150261	0.114054
CAALFM_C104800CA	C1_04800C_A		0.185441	0.748893
CAALFM_C104810WA	C1_04810W_A	TCO89	0.0683959	0.467948
CAALFM_C104820CA	C1_04820C_A		-0.43639	0.0261949
CAALFM_C104830WA	C1_04830W_A	SEC21	0.141018	0.140517
CAALFM_C104840CA	C1_04840C_A		0.118275	0.373679
CAALFM_C104850CA	C1_04850C_A	NA	0.160179	0.248397
CAALFM_C104860WA	C1_04860W_A		0.105869	0.222032
CAALFM_C104870WA	C1_04870W_A	SAP7	-0.166363	0.79708
CAALFM_C104880CA	C1_04880C_A	MRPL37	-0.520768	0.015808
CAALFM_C104890WA	C1_04890W_A	YBN5	-0.162782	0.173237
CAALFM_C104900WA	C1_04900W_A	MNN15	0.0692747	0.515958
CAALFM_C104910CA	C1_04910C_A		0.383385	0.00061152
CAALFM_C104930CA	C1_04930C_A		0.588783	0.0152923
CAALFM_C104940CA	C1_04940C_A		-0.209719	0.588941
CAALFM_C104950CA	C1_04950C_A	RPM2	-0.240296	0.0736462
CAALFM_C104960CA	C1_04960C_A		-0.0767069	0.448272
CAALFM_C104970WA	C1_04970W_A		-0.491339	0.00637224
CAALFM_C104980CA	C1_04980C_A		-0.0786618	0.393585
CAALFM_C104990CA	C1_04990C_A		-0.0603471	0.520235
CAALFM_C105000WA	C1_05000W_A	RHD1	-0.484242	0.0143945
CAALFM_C105010CA	C1_05010C_A		0.00231501	0.984469
CAALFM_C105020CA	C1_05020C_A	ARG2	0.091099	0.35605
CAALFM_C105030CA	C1_05030C_A	PSF2	0.06767	0.539187
CAALFM_C105050CA	C1_05050C_A	RRP6	-0.227869	0.0243359
CAALFM_C105060WA	C1_05060W_A	REI1	-0.185129	0.320678
CAALFM_C105070CA	C1_05070C_A	GPI7	0.12808	0.189776
CAALFM_C105080WA	C1_05080W_A	GPT1	-0.251221	0.220136
CAALFM_C105090WA	C1_05090W_A	TRY2	-0.0186826	0.878607
CAALFM_C105100WA	C1_05100W_A		0.254771	0.0568462
CAALFM_C105110CA	C1_05110C_A	ARO4	-0.10351	0.457331
CAALFM_C105120WA	C1_05120W_A		0.0832381	0.456496
CAALFM_C105140WA	C1_05140W_A	BRG1	0.426241	1.11e-05
CAALFM_C105150CA	C1_05150C_A		-0.936785	0.0674686
CAALFM_C105160CA	C1_05160C_A		-0.0255266	0.89988
CAALFM_C105170CA	C1_05170C_A	CUE5	0.203888	0.0302744
CAALFM_C105180CA	C1_05180C_A		-0.160096	0.420214
CAALFM_C105190CA	C1_05190C_A		-0.144097	0.335816
CAALFM_C105200CA	C1_05200C_A		0.0504394	0.678937
CAALFM_C105210CA	C1_05210C_A		-0.42474	0.00603438
CAALFM_C105220CA	C1_05220C_A		-0.012927	0.948222
CAALFM_C105230WA	C1_05230W_A		-0.240628	0.0548275
CAALFM_C105240CA	C1_05240C_A	RPT1	-0.135071	0.110505
CAALFM_C105250WA	C1_05250W_A		NA	NA
CAALFM_C105260CA	C1_05260C_A	SDH1	-0.0637762	0.540569
CAALFM_C105270CA	C1_05270C_A		-0.453308	0.00667869
CAALFM_C105280WA	C1_05280W_A		0.0428115	0.686715
CAALFM_C105290WA	C1_05290W_A	GRS1	-0.033166	0.728887
CAALFM_C105300CA	C1_05300C_A	PRD1	0.343311	0.00022032
CAALFM_C105310WA	C1_05310W_A	PRD1	-0.576428	0.618909
CAALFM_C105320CA	C1_05320C_A		0.117679	0.343777
CAALFM_C105330CA	C1_05330C_A		-0.408735	0.00051174
CAALFM_C105340CA	C1_05340C_A	ZCF2	-0.166791	0.137394
CAALFM_C105350WA	C1_05350W_A	YPT53	0.194891	0.160552
CAALFM_C105360CA	C1_05360C_A		-0.0525556	0.614109
CAALFM_C105370CA	C1_05370C_A		-0.105449	0.46829
CAALFM_C105380CA	C1_05380C_A		0.0110845	0.909431
CAALFM_C105390CA	C1_05390C_A		-0.0802553	0.426877
CAALFM_C105400CA	C1_05400C_A		-0.232767	0.061626
CAALFM_C105410CA	C1_05410C_A	TRP99	-0.046543	0.694569
CAALFM_C105420WA	C1_05420W_A		0.00834129	0.944959
CAALFM_C105430WA	C1_05430W_A	SPT20	-0.0114121	0.905273
CAALFM_C105440CA	C1_05440C_A		0.17464	0.511431
CAALFM_C105450WA	C1_05450W_A		NA	NA
CAALFM_C105460WA	C1_05460W_A	KOG1	0.0240111	0.779286
CAALFM_C105470WA	C1_05470W_A	MTM1	-0.201217	0.0965238
CAALFM_C105480CA	C1_05480C_A		0.0672859	0.821546
CAALFM_C105490CA	C1_05490C_A		-0.0893557	0.554827
CAALFM_C105500WA	C1_05500W_A	RSM22	-0.476611	9.64e-07
CAALFM_C105510CA	C1_05510C_A	RPS27A	-0.0672204	0.66241
CAALFM_C105520WA	C1_05520W_A		0.145192	0.249113
CAALFM_C105530CA	C1_05530C_A	SSH1	-0.0121887	0.906046
CAALFM_C105540CA	C1_05540C_A		0.289161	0.0676086
CAALFM_C105550CA	C1_05550C_A		-0.141868	0.8665
CAALFM_C105560WA	C1_05560W_A	RIB4	0.465192	0.00026632
CAALFM_C105570WA	C1_05570W_A	RIB4	-0.888273	0.700899
CAALFM_C105580WA	C1_05580W_A	RIB4	-1.47317	0.270866
CAALFM_C105590WA	C1_05590W_A	RIB4	NA	NA
CAALFM_C105600WA	C1_05600W_A	GSL1	0.103446	0.349804
CAALFM_C105610WA	C1_05610W_A		-0.0428371	0.672251
CAALFM_C105620CA	C1_05620C_A	STE3	-0.228393	0.109288
CAALFM_C105630CA	C1_05630C_A		-0.261487	0.01403
CAALFM_C105640CA	C1_05640C_A	FAL1	-0.164588	0.176839
CAALFM_C105650WA	C1_05650W_A		-0.185535	0.143338
CAALFM_C105660CA	C1_05660C_A		-0.0816168	0.358018
CAALFM_C105670WA	C1_05670W_A		0.167692	0.0946028
CAALFM_C105680CA	C1_05680C_A	RIM1	0.051431	0.609858
CAALFM_C105690CA	C1_05690C_A		-0.356286	0.604762
CAALFM_C105700WA	C1_05700W_A	AUT7	-0.116756	0.526003
CAALFM_C105710CA	C1_05710C_A	UGA4	0.202874	0.455464
CAALFM_C105720WA	C1_05720W_A		-0.3146	0.026819
CAALFM_C105730WA	C1_05730W_A		NA	NA
CAALFM_C105740CA	C1_05740C_A		0.102349	0.413459
CAALFM_C105750CA	C1_05750C_A		0.0051155	0.95356
CAALFM_C105760CA	C1_05760C_A	PGA26	0.888864	0.00170318
CAALFM_C105770CA	C1_05770C_A	PRC3	0.27872	0.0541034
CAALFM_C105780WA	C1_05780W_A		-0.0259103	0.805696
CAALFM_C105790WA	C1_05790W_A		-0.392758	0.0592005
CAALFM_C105800CA	C1_05800C_A		0.0472351	0.740633
CAALFM_C105810WA	C1_05810W_A	GIM5	-0.0072006	0.941788
CAALFM_C105820CA	C1_05820C_A	RAD10	0.295142	0.0461758
CAALFM_C105830WA	C1_05830W_A		0.114094	0.942426
CAALFM_C105840WA	C1_05840W_A	PRN1	-1.22825	8.76e-15
CAALFM_C105850WA	C1_05850W_A	POL32	-0.0582777	0.574564
CAALFM_C105860WA	C1_05860W_A	PRN2	-0.257884	0.0330438
CAALFM_C105870WA	C1_05870W_A	PRN3	-0.445472	0.00648658
CAALFM_C105880WA	C1_05880W_A	PRN4	-0.355015	0.00107678
CAALFM_C105890WA	C1_05890W_A		0.175969	0.770864
CAALFM_C105900WA	C1_05900W_A		-0.0590819	0.496148
CAALFM_C105910WA	C1_05910W_A	SIP5	0.00058154	0.995072
CAALFM_C105920WA	C1_05920W_A		0.196167	0.1514
CAALFM_C105930CA	C1_05930C_A		0.0478711	0.612868
CAALFM_C105940WA	C1_05940W_A	PHO87	0.0977531	0.281482
CAALFM_C105950CA	C1_05950C_A		0.524781	2.15e-06
CAALFM_C105960WA	C1_05960W_A	PGA45	0.232082	0.0568937
CAALFM_C105970WA	C1_05970W_A		0.575978	0.328549
CAALFM_C105980WA	C1_05980W_A		0.176571	0.103769
CAALFM_C105990CA	C1_05990C_A		-0.0671649	0.688853
CAALFM_C106000WA	C1_06000W_A		-0.307321	0.383333
CAALFM_C106010WA	C1_06010W_A	CHS7	0.0478369	0.608646
CAALFM_C106020WA	C1_06020W_A	RGD1	0.0411886	0.680649
CAALFM_C106030CA	C1_06030C_A		0.134552	0.288089
CAALFM_C106040WA	C1_06040W_A	RTT101	0.0371621	0.724671
CAALFM_C106050CA	C1_06050C_A		-0.211576	0.312305
CAALFM_C106060CA	C1_06060C_A	ACP1	-0.206728	0.190685
CAALFM_C106070WA	C1_06070W_A		-0.387191	0.0175828
CAALFM_C106080CA	C1_06080C_A	ARC35	0.207941	0.0322754
CAALFM_C106090CA	C1_06090C_A		-0.046314	0.610248
CAALFM_C106100CA	C1_06100C_A	MSI3	-0.228012	0.0499015
CAALFM_C106110CA	C1_06110C_A	NPL4	-0.0817435	0.39035
CAALFM_C106120CA	C1_06120C_A		0.113634	0.496052
CAALFM_C106130CA	C1_06130C_A	HAC1	0.444973	5.82e-07
CAALFM_C106150WA	C1_06150W_A		0.1217	0.976503
CAALFM_C106160WA	C1_06160W_A		-0.624254	0.56486
CAALFM_C106180WA	C1_06180W_A	TLO34	0.114569	0.223288
CAALFM_C106190CA	C1_06190C_A		NA	NA
CAALFM_C106200WA	C1_06200W_A		-0.0012576	0.990338
CAALFM_C106210WA	C1_06210W_A	BUD16	-0.180342	0.212133
CAALFM_C106220CA	C1_06220C_A		0.091491	0.83266
CAALFM_C106230CA	C1_06230C_A	MDM34	-0.202705	0.0564881
CAALFM_C106250WA	C1_06250W_A		0.23378	0.0795162
CAALFM_C106260WA	C1_06260W_A	PGA50	0.0941021	0.972236
CAALFM_C106270WA	C1_06270W_A		0.198414	0.0676541
CAALFM_C106280CA	C1_06280C_A	UME6	0.870857	1.96e-12
CAALFM_C106300WA	C1_06300W_A	UME6	0.644828	0.354015
CAALFM_C106310WA	C1_06310W_A	UME6	0.661238	0.535171
CAALFM_C106320WA	C1_06320W_A		0.0943731	0.398705
CAALFM_C106340WA	C1_06340W_A		0.751516	0.00189994
CAALFM_C106350WA	C1_06350W_A		-0.291833	0.0511942
CAALFM_C106360WA	C1_06360W_A		0.00803516	0.942493
CAALFM_C106370CA	C1_06370C_A	PBR1	-0.987895	0.443791
CAALFM_C106380CA	C1_06380C_A		0.0250205	0.853332
CAALFM_C106390WA	C1_06390W_A		-0.114772	0.328965
CAALFM_C106400CA	C1_06400C_A		-0.0061544	0.94753
CAALFM_C106410WA	C1_06410W_A		0.050673	0.675241
CAALFM_C106420CA	C1_06420C_A		0.0853883	0.389711
CAALFM_C106430CA	C1_06430C_A		2.35346	0.133512
CAALFM_C106440CA	C1_06440C_A		-0.291535	0.0131046
CAALFM_C106450CA	C1_06450C_A	RPS14B	-0.237315	0.133294
CAALFM_C106460CA	C1_06460C_A	RPS22A	-0.232079	0.19531
CAALFM_C106470WA	C1_06470W_A		-0.17739	0.307606
CAALFM_C106480CA	C1_06480C_A		0.0774812	0.571315
CAALFM_C106490CA	C1_06490C_A		-0.295403	0.659856
CAALFM_C106500WA	C1_06500W_A		0.0338357	0.74928
CAALFM_C106510CA	C1_06510C_A		-0.192729	0.0417743
CAALFM_C106520CA	C1_06520C_A	BPH1	-0.0216773	0.86448
CAALFM_C106530CA	C1_06530C_A		-0.0265058	0.758652
CAALFM_C106540CA	C1_06540C_A		-0.154944	0.238727
CAALFM_C106550WA	C1_06550W_A	GLT1	0.0387132	0.66236
CAALFM_C106560WA	C1_06560W_A		0.0339908	0.740267
CAALFM_C106570WA	C1_06570W_A	ANT1	0.0451149	0.804003
CAALFM_C106580WA	C1_06580W_A	RPS23A	-0.209384	0.143012
CAALFM_C106590CA	C1_06590C_A		0.00280748	0.974692
CAALFM_C106600WA	C1_06600W_A		0.0628668	0.464201
CAALFM_C106610CA	C1_06610C_A	HAK1	0.614327	0.468536
CAALFM_C106620CA	C1_06620C_A		-0.735607	0.190861
CAALFM_C106630WA	C1_06630W_A		-0.143954	0.139332
CAALFM_C106640CA	C1_06640C_A		-0.266929	0.0425006
CAALFM_C106650WA	C1_06650W_A		0.10685	0.324773
CAALFM_C106660WA	C1_06660W_A		0.225376	0.0397961
CAALFM_C106670WA	C1_06670W_A		-0.10904	0.257562
CAALFM_C106680WA	C1_06680W_A	VPS34	0.0543622	0.588711
CAALFM_C106690WA	C1_06690W_A	CYK3	0.053051	0.59084
CAALFM_C106700WA	C1_06700W_A		0.0337515	0.701612
CAALFM_C106710WA	C1_06710W_A		0.0799659	0.488037
CAALFM_C106720CA	C1_06720C_A		-0.0361779	0.773287
CAALFM_C106730WA	C1_06730W_A	RAC1	0.0482816	0.622912
CAALFM_C106740CA	C1_06740C_A	NOP6	-0.0324516	0.813435
CAALFM_C106750WA	C1_06750W_A		0.315585	0.0260921
CAALFM_C106760CA	C1_06760C_A	NA	-0.0710786	0.595302
CAALFM_C106770WA	C1_06770W_A		-0.0632082	0.507431
CAALFM_C106780WA	C1_06780W_A	NPR1	-0.0540993	0.546488
CAALFM_C106790CA	C1_06790C_A	MRPL19	-0.465381	0.0183601
CAALFM_C106800WA	C1_06800W_A		-0.102506	0.389006
CAALFM_C106810WA	C1_06810W_A	CAT1	-0.220311	0.0140808
CAALFM_C106820WA	C1_06820W_A		-0.0536006	0.647801
CAALFM_C106830WA	C1_06830W_A		0.131864	0.762517
CAALFM_C106840CA	C1_06840C_A		-0.404659	0.00093483
CAALFM_C106850WA	C1_06850W_A	PCL7	0.0363685	0.683249
CAALFM_C106860WA	C1_06860W_A		-0.145099	0.896725
CAALFM_C106870CA	C1_06870C_A		0.404898	0.016109
CAALFM_C106880CA	C1_06880C_A	SPO22	-0.685272	0.163277
CAALFM_C106890CA	C1_06890C_A		-0.237234	0.119309
CAALFM_C106900CA	C1_06900C_A	MMD1	0.164525	0.0696545
CAALFM_C106910CA	C1_06910C_A		-0.157389	0.0903723
CAALFM_C106920CA	C1_06920C_A		0.371116	0.00104717
CAALFM_C106930WA	C1_06930W_A	PGA63	0.239573	0.00885943
CAALFM_C106940CA	C1_06940C_A	ATC1	0.178745	0.128573
CAALFM_C106950CA	C1_06950C_A	ATC1	-0.796582	0.285114
CAALFM_C106960WA	C1_06960W_A	SUI2	-0.169507	0.149894
CAALFM_C106970CA	C1_06970C_A		0.0812376	0.522435
CAALFM_C106980CA	C1_06980C_A		-0.275266	0.075749
CAALFM_C106990CA	C1_06990C_A		-2.04335	0.0543291
CAALFM_C107000WA	C1_07000W_A	MEF2	-0.615742	4.97e-06
CAALFM_C107010WA	C1_07010W_A		-0.0028585	0.978129
CAALFM_C107020CA	C1_07020C_A	PUT3	0.0179635	0.862413
CAALFM_C107030CA	C1_07030C_A	RBT4	0.195717	0.0736163
CAALFM_C107040CA	C1_07040C_A		1.38239	1.39e-06
CAALFM_C107050CA	C1_07050C_A		-0.0092573	0.932776
CAALFM_C107060CA	C1_07060C_A		0.0203433	0.865864
CAALFM_C107070CA	C1_07070C_A	DHH1	-0.13683	0.22652
CAALFM_C107080WA	C1_07080W_A		0.845459	1.52e-05
CAALFM_C107090CA	C1_07090C_A		-0.0302499	0.742151
CAALFM_C107100CA	C1_07100C_A		0.205825	0.116625
CAALFM_C107110WA	C1_07110W_A	TAF145	0.0309728	0.736003
CAALFM_C107120WA	C1_07120W_A	GAP4	0.443962	1.92e-07
CAALFM_C107130CA	C1_07130C_A		-0.0078063	0.932196
CAALFM_C107140CA	C1_07140C_A	RIA1	-0.0397952	0.696199
CAALFM_C107150WA	C1_07150W_A		-0.114461	0.564313
CAALFM_C107160CA	C1_07160C_A		0.526156	0.0782751
CAALFM_C107170CA	C1_07170C_A	ZCF23	0.133959	0.315763
CAALFM_C107180WA	C1_07180W_A	CCS1	-1.14829	7.25e-41
CAALFM_C107190WA	C1_07190W_A	SOG2	-0.0367412	0.722338
CAALFM_C107200WA	C1_07200W_A	YMC1	-0.0315446	0.80787
CAALFM_C107210CA	C1_07210C_A		-0.0866195	0.344751
CAALFM_C107220WA	C1_07220W_A		0.385581	0.0415656
CAALFM_C107230WA	C1_07230W_A	PHO15	0.0533235	0.630707
CAALFM_C107240WA	C1_07240W_A	YPD1	0.0221824	0.820134
CAALFM_C107250CA	C1_07250C_A	ALG9	0.103963	0.320842
CAALFM_C107260CA	C1_07260C_A		0.132407	0.216645
CAALFM_C107270WA	C1_07270W_A	SEC34	0.0892235	0.339913
CAALFM_C107280CA	C1_07280C_A		-0.0494719	0.706064
CAALFM_C107310CA	C1_07310C_A		-0.938451	0.359315
CAALFM_C107320WA	C1_07320W_A		-0.412635	0.354464
CAALFM_C107330WA	C1_07330W_A	RME1	-0.749789	0.475476
CAALFM_C107340WA	C1_07340W_A		0.105548	0.239688
CAALFM_C107350CA	C1_07350C_A	GPX3	-0.277594	0.0387016
CAALFM_C107360WA	C1_07360W_A		-0.108459	0.27299
CAALFM_C107370CA	C1_07370C_A	CPH1	0.0969561	0.375346
CAALFM_C107380CA	C1_07380C_A	KSP1	-0.0626282	0.617489
CAALFM_C107390WA	C1_07390W_A		-0.0025332	0.97691
CAALFM_C107400CA	C1_07400C_A		-0.0623631	0.617615
CAALFM_C107410CA	C1_07410C_A	SKP1	0.16398	0.0651483
CAALFM_C107420CA	C1_07420C_A	PEX3	0.0105979	0.933199
CAALFM_C107430WA	C1_07430W_A	PHO100	0.56631	0.25668
CAALFM_C107440WA	C1_07440W_A		-0.0039876	0.966293
CAALFM_C107450WA	C1_07450W_A		-0.0702749	0.644501
CAALFM_C107460CA	C1_07460C_A	GPI8	0.0679109	0.553451
CAALFM_C107470CA	C1_07470C_A		-0.120061	0.453894
CAALFM_C107480CA	C1_07480C_A		0.386843	0.339995
CAALFM_C107490CA	C1_07490C_A		-0.115192	0.24833
CAALFM_C107500CA	C1_07500C_A	LHP1	-0.243064	0.0324576
CAALFM_C107510WA	C1_07510W_A		0.138429	0.162824
CAALFM_C107520CA	C1_07520C_A	IST2	-0.0114226	0.923334
CAALFM_C107530WA	C1_07530W_A		-0.0054364	0.976573
CAALFM_C107540CA	C1_07540C_A	BBC1	-0.0226941	0.814412
CAALFM_C107550WA	C1_07550W_A	SWD2	-0.121738	0.245483
CAALFM_C107560WA	C1_07560W_A		0.246235	0.0695455
CAALFM_C107570CA	C1_07570C_A		0.109646	0.504391
CAALFM_C107580CA	C1_07580C_A	PRY1	-1.08958	0.320549
CAALFM_C107590CA	C1_07590C_A		0.048761	0.641883
CAALFM_C107600WA	C1_07600W_A	ATP7	-0.260156	0.146342
CAALFM_C107610CA	C1_07610C_A		-0.303372	0.197642
CAALFM_C107620CA	C1_07620C_A	PIR32	-0.666466	0.107
CAALFM_C107630WA	C1_07630W_A		-0.128916	0.321374
CAALFM_C107640CA	C1_07640C_A		-0.448672	0.00862544
CAALFM_C107650WA	C1_07650W_A		-0.124174	0.277159
CAALFM_C107660WA	C1_07660W_A		-0.291287	0.0737199
CAALFM_C107670WA	C1_07670W_A	ZCF4	0.340198	0.417548
CAALFM_C107680WA	C1_07680W_A	HAP2	0.214388	0.14667
CAALFM_C107690CA	C1_07690C_A		-0.106989	0.25392
CAALFM_C107700CA	C1_07700C_A	VRG4	-0.119208	0.237176
CAALFM_C107710CA	C1_07710C_A	ADE4	0.0641893	0.468187
CAALFM_C107770WA	C1_07770W_A	NA	0.149077	0.263066
CAALFM_C107780WA	C1_07780W_A		0.113062	0.266842
CAALFM_C107790CA	C1_07790C_A		-0.028205	0.833033
CAALFM_C107800WA	C1_07800W_A	MTO1	-0.301321	0.0561049
CAALFM_C107810CA	C1_07810C_A		-0.15811	0.171354
CAALFM_C107820WA	C1_07820W_A		-0.141985	0.300198
CAALFM_C107830CA	C1_07830C_A		0.0174784	0.898229
CAALFM_C107840WA	C1_07840W_A		0.119656	0.194486
CAALFM_C107850CA	C1_07850C_A		-0.0319957	0.821133
CAALFM_C107860WA	C1_07860W_A		-0.0372952	0.800715
CAALFM_C107870CA	C1_07870C_A	SMI1	0.0120668	0.892025
CAALFM_C107880CA	C1_07880C_A	GCS1	-1.87224	1.14e-34
CAALFM_C107890CA	C1_07890C_A	ADE5,7	0.127364	0.172218
CAALFM_C107900WA	C1_07900W_A	COI1	0.17843	0.221263
CAALFM_C107910CA	C1_07910C_A	MRPL3	-0.464941	0.00168452
CAALFM_C107920WA	C1_07920W_A		-0.270733	0.152089
CAALFM_C107930CA	C1_07930C_A	ERD1	0.0402947	0.713472
CAALFM_C107940WA	C1_07940W_A	ERD1	-0.0226031	0.954258
CAALFM_C107950CA	C1_07950C_A		-0.018635	0.909894
CAALFM_C107960WA	C1_07960W_A		0.106142	0.597977
CAALFM_C107970CA	C1_07970C_A	IRE1	0.0571654	0.509989
CAALFM_C107980CA	C1_07980C_A		0.523175	0.0752223
CAALFM_C107990CA	C1_07990C_A		0.0309762	0.855297
CAALFM_C108000WA	C1_08000W_A	NRP1	-0.110638	0.360715
CAALFM_C108010WA	C1_08010W_A	DPM1	0.41	1.32e-05
CAALFM_C108020WA	C1_08020W_A	UBA2	0.0432284	0.669198
CAALFM_C108030WA	C1_08030W_A	PFY1	0.221125	0.00881498
CAALFM_C108040WA	C1_08040W_A		0.216584	0.17332
CAALFM_C108050WA	C1_08050W_A		-0.101472	0.537957
CAALFM_C108060WA	C1_08060W_A	OFR1	0.192228	0.0446552
CAALFM_C108070WA	C1_08070W_A	CDR4	-0.281725	0.0447288
CAALFM_C108080CA	C1_08080C_A		-0.0639702	0.723878
CAALFM_C108090CA	C1_08090C_A	FUN12	-0.248207	0.0087022
CAALFM_C108100WA	C1_08100W_A	DRG1	-0.136973	0.173672
CAALFM_C108110WA	C1_08110W_A		-0.0734737	0.400882
CAALFM_C108120WA	C1_08120W_A	BUD6	-0.0668	0.468084
CAALFM_C108130CA	C1_08130C_A	TERT	-0.0232644	0.829546
CAALFM_C108140WA	C1_08140W_A		0.0265884	0.807346
CAALFM_C108150CA	C1_08150C_A		0.169726	0.533797
CAALFM_C108160WA	C1_08160W_A		-0.0273575	0.769938
CAALFM_C108170CA	C1_08170C_A	BUL1	-0.236543	0.00583177
CAALFM_C108180CA	C1_08180C_A		0.173497	0.164056
CAALFM_C108190CA	C1_08190C_A	CAT8	0.0393575	0.787268
CAALFM_C108200WA	C1_08200W_A	NTG1	0.0353834	0.765995
CAALFM_C108210CA	C1_08210C_A	MLT1	-0.0203409	0.847429
CAALFM_C108220WA	C1_08220W_A	CCR4	-0.104975	0.254307
CAALFM_C108230CA	C1_08230C_A	PLB5	0.147627	0.107669
CAALFM_C108240CA	C1_08240C_A		-0.0829376	0.435796
CAALFM_C108260CA	C1_08260C_A	LTP1	-0.0007899	0.99335
CAALFM_C108270CA	C1_08270C_A	MED15	0.145776	0.083436
CAALFM_C108290CA	C1_08290C_A	DIP2	-0.22536	0.0280384
CAALFM_C108300WA	C1_08300W_A	NOT5	0.0314707	0.743851
CAALFM_C108310WA	C1_08310W_A	OPY2	0.0466825	0.711649
CAALFM_C108320WA	C1_08320W_A	TKL1	-0.109974	0.352264
CAALFM_C108330CA	C1_08330C_A	ADH2	0.0754554	0.550476
CAALFM_C108340CA	C1_08340C_A		0.143692	0.167173
CAALFM_C108350CA	C1_08350C_A		-0.303344	0.210792
CAALFM_C108360CA	C1_08360C_A	OLE1	0.0998859	0.238573
CAALFM_C108370WA	C1_08370W_A	SDS24	0.00940897	0.912475
CAALFM_C108380WA	C1_08380W_A	TEF2	-0.193376	0.0677068
CAALFM_C108390CA	C1_08390C_A		-0.0321083	0.742908
CAALFM_C108400CA	C1_08400C_A	GCV2	1.87976	2.29e-44
CAALFM_C108410CA	C1_08410C_A	SAM4	0.0969866	0.491032
CAALFM_C108420WA	C1_08420W_A	GCR3	-0.141561	0.187872
CAALFM_C108430WA	C1_08430W_A	CAF16	0.122535	0.165286
CAALFM_C108440CA	C1_08440C_A		-0.080472	0.660921
CAALFM_C108450CA	C1_08450C_A	CDC42	0.0956967	0.334686
CAALFM_C108460CA	C1_08460C_A	UPC2	0.0508443	0.553452
CAALFM_C108470WA	C1_08470W_A		-0.19764	0.181409
CAALFM_C108480CA	C1_08480C_A	APS3	-0.0358229	0.745334
CAALFM_C108490WA	C1_08490W_A		-0.0729738	0.597739
CAALFM_C108500CA	C1_08500C_A	ENO1	0.0892898	0.420206
CAALFM_C108510WA	C1_08510W_A	EAF6	-0.211777	0.184092
CAALFM_C108520CA	C1_08520C_A		-0.506629	0.00494958
CAALFM_C108530WA	C1_08530W_A		0.206147	0.305703
CAALFM_C108540CA	C1_08540C_A		-0.034966	0.704454
CAALFM_C108550CA	C1_08550C_A	GCF1	0.0963805	0.326586
CAALFM_C108560WA	C1_08560W_A	TCP1	-0.108428	0.311101
CAALFM_C108570CA	C1_08570C_A	PCL2	0.0598793	0.651708
CAALFM_C108580CA	C1_08580C_A	VCX1	0.11922	0.191947
CAALFM_C108590CA	C1_08590C_A	ERG1	0.727275	2.51e-10
CAALFM_C108600CA	C1_08600C_A	GCD6	-0.112032	0.271653
CAALFM_C108610CA	C1_08610C_A		0.0841989	0.455231
CAALFM_C108620WA	C1_08620W_A	CTR2	0.747373	1.25e-08
CAALFM_C108630WA	C1_08630W_A		-0.163275	0.122078
CAALFM_C108640WA	C1_08640W_A	RTG1	0.100068	0.416283
CAALFM_C108650CA	C1_08650C_A	FAD1	0.273704	0.0216474
CAALFM_C108660CA	C1_08660C_A		0.0978129	0.532252
CAALFM_C108670WA	C1_08670W_A	SWI6	0.0100247	0.912525
CAALFM_C108680CA	C1_08680C_A		-0.0590474	0.585269
CAALFM_C108690WA	C1_08690W_A		-0.138199	0.259426
CAALFM_C108700WA	C1_08700W_A		-0.0336415	0.692472
CAALFM_C108710WA	C1_08710W_A		-0.0019893	0.990675
CAALFM_C108730WA	C1_08730W_A		0.115567	0.287857
CAALFM_C108740CA	C1_08740C_A	SEC24	0.287366	0.00055693
CAALFM_C108750WA	C1_08750W_A	YMC2	0.126754	0.408636
CAALFM_C108760WA	C1_08760W_A		-0.0784983	0.58663
CAALFM_C108770WA	C1_08770W_A		0.179969	0.245855
CAALFM_C108780WA	C1_08780W_A		0.203467	0.0789655
CAALFM_C108790WA	C1_08790W_A	TPO3	0.237047	0.0741165
CAALFM_C108800WA	C1_08800W_A		0.0160283	0.863269
CAALFM_C108810CA	C1_08810C_A	MSS116	-0.37491	1.38e-05
CAALFM_C108820CA	C1_08820C_A		-0.153188	0.291079
CAALFM_C108830CA	C1_08830C_A		-0.243611	0.501912
CAALFM_C108840WA	C1_08840W_A		-0.205846	0.510296
CAALFM_C108850CA	C1_08850C_A	AFG1	0.0740139	0.631211
CAALFM_C108860CA	C1_08860C_A		0.0680173	0.486753
CAALFM_C108870CA	C1_08870C_A	JIP5	-0.130227	0.346098
CAALFM_C108880WA	C1_08880W_A	HEM14	0.232996	0.105772
CAALFM_C108890CA	C1_08890C_A		0.0714041	0.717086
CAALFM_C108900WA	C1_08900W_A		0.692049	1.01e-15
CAALFM_C108910CA	C1_08910C_A		-0.23205	0.0775322
CAALFM_C108920WA	C1_08920W_A		-0.412141	0.0131528
CAALFM_C108930CA	C1_08930C_A		-0.138008	0.49663
CAALFM_C108940CA	C1_08940C_A	MSN4	-0.145003	0.206754
CAALFM_C108950WA	C1_08950W_A	PFK26	0.149411	0.211611
CAALFM_C108960WA	C1_08960W_A	PFK26	-0.159793	0.298616
CAALFM_C108970WA	C1_08970W_A	PFK26	-0.226432	0.0499207
CAALFM_C108980CA	C1_08980C_A	ZWF1	-0.12228	0.319196
CAALFM_C108990CA	C1_08990C_A	KEX2	0.227924	0.0170948
CAALFM_C109000WA	C1_09000W_A		-0.0271464	0.842181
CAALFM_C109010WA	C1_09010W_A	NAR1	-1.71451	6.33e-78
CAALFM_C109020WA	C1_09020W_A		-0.0457688	0.787284
CAALFM_C109030CA	C1_09030C_A	COX5	-0.0547919	0.733747
CAALFM_C109040CA	C1_09040C_A	NA	-0.165935	0.19018
CAALFM_C109050WA	C1_09050W_A	HST1	-0.200344	0.0350543
CAALFM_C109060CA	C1_09060C_A		0.446292	5.6e-05
CAALFM_C109070WA	C1_09070W_A		0.0302658	0.742266
CAALFM_C109080CA	C1_09080C_A	PGA6	-0.232919	0.00992279
CAALFM_C109090CA	C1_09090C_A	ARG81	-0.0005128	0.995473
CAALFM_C109100WA	C1_09100W_A	ZCF28	0.0480662	0.733914
CAALFM_C109110WA	C1_09110W_A		0.0329498	0.800648
CAALFM_C109120WA	C1_09120W_A	IPT1	-0.484782	0.00134103
CAALFM_C109130WA	C1_09130W_A		0.124795	0.251943
CAALFM_C109140CA	C1_09140C_A	SSU81	0.0432328	0.699066
CAALFM_C109150WA	C1_09150W_A	AOX2	-0.121249	0.890804
CAALFM_C109160WA	C1_09160W_A	AOX1	0.697257	0.0149664
CAALFM_C109170WA	C1_09170W_A	CTA8	0.227431	0.143858
CAALFM_C109180WA	C1_09180W_A	LYS143	0.0549579	0.692063
CAALFM_C109190CA	C1_09190C_A	DAK2	0.0484216	0.571081
CAALFM_C109200WA	C1_09200W_A	LYS142	0.0889749	0.354587
CAALFM_C109210CA	C1_09210C_A		-0.953702	2.19e-27
CAALFM_C109220WA	C1_09220W_A		0.301554	0.00896764
CAALFM_C109230CA	C1_09230C_A	GRP1	0.164891	0.126371
CAALFM_C109240CA	C1_09240C_A		1.37546	2.46e-07
CAALFM_C109250WA	C1_09250W_A	CRP1	-0.161563	0.210512
CAALFM_C109260CA	C1_09260C_A	PTC1	0.0106231	0.913667
CAALFM_C109270WA	C1_09270W_A	FGR43	0.2042	0.11477
CAALFM_C109280WA	C1_09280W_A		0.0501456	0.664873
CAALFM_C109290CA	C1_09290C_A	ARG5,6	0.288231	0.236988
CAALFM_C109300CA	C1_09300C_A		0.357626	0.0996708
CAALFM_C109310CA	C1_09310C_A		0.256077	0.175078
CAALFM_C109320CA	C1_09320C_A		-0.0788158	0.511834
CAALFM_C109330WA	C1_09330W_A		-0.303337	0.0469155
CAALFM_C109340CA	C1_09340C_A		0.402868	0.0479293
CAALFM_C109350WA	C1_09350W_A		-0.0373584	0.740276
CAALFM_C109360CA	C1_09360C_A		0.029723	0.731632
CAALFM_C109370WA	C1_09370W_A	CEF1	0.0269271	0.825818
CAALFM_C109380WA	C1_09380W_A	RIM20	0.0625515	0.524594
CAALFM_C109390WA	C1_09390W_A		-0.167762	0.268775
CAALFM_C109400CA	C1_09400C_A	FTH1	0.24015	0.440102
CAALFM_C109420WA	C1_09420W_A	LIP2	-0.597508	0.405328
CAALFM_C109430WA	C1_09430W_A		0.224534	0.0397794
CAALFM_C109440WA	C1_09440W_A		0.0486236	0.679444
CAALFM_C109450CA	C1_09450C_A	NUP188	-0.0405713	0.669069
CAALFM_C109460WA	C1_09460W_A	ERG12	-0.006674	0.953372
CAALFM_C109470CA	C1_09470C_A		0.00723314	0.953763
CAALFM_C109480WA	C1_09480W_A	PPT2	0.104771	0.411977
CAALFM_C109490CA	C1_09490C_A	GUA1	-0.298822	0.00041706
CAALFM_C109500WA	C1_09500W_A		0.480637	0.710684
CAALFM_C109510WA	C1_09510W_A	YTM1	-0.245936	0.0392121
CAALFM_C109520CA	C1_09520C_A		0.071441	0.652484
CAALFM_C109530WA	C1_09530W_A	RAM2	0.0753028	0.465419
CAALFM_C109540WA	C1_09540W_A		-0.062549	0.527813
CAALFM_C109550WA	C1_09550W_A		-0.0687107	0.855139
CAALFM_C109560CA	C1_09560C_A		0.284504	0.439598
CAALFM_C109570WA	C1_09570W_A		-0.343279	0.00100778
CAALFM_C109580CA	C1_09580C_A	LIP1	-0.159075	0.54094
CAALFM_C109590CA	C1_09590C_A	LIP10	1.1231	0.466636
CAALFM_C109600CA	C1_09600C_A	LIP6	0.254999	0.0342665
CAALFM_C109610WA	C1_09610W_A		-0.0331575	0.711172
CAALFM_C109620CA	C1_09620C_A		-0.138984	0.316418
CAALFM_C109630WA	C1_09630W_A	IDH1	-0.248144	0.0125363
CAALFM_C109640WA	C1_09640W_A	ADE12	0.207696	0.0251083
CAALFM_C109650WA	C1_09650W_A		0.287559	0.00768771
CAALFM_C109660WA	C1_09660W_A	DOA1	0.0520946	0.549319
CAALFM_C109670CA	C1_09670C_A		0.0595433	0.59511
CAALFM_C109680WA	C1_09680W_A	MTS1	0.0465865	0.66315
CAALFM_C109690WA	C1_09690W_A	MLS1	1.03529	1.74e-06
CAALFM_C109700WA	C1_09700W_A		2.33742	0.138971
CAALFM_C109710CA	C1_09710C_A		0.0118707	0.927323
CAALFM_C109720WA	C1_09720W_A	URA1	0.269856	0.00116679
CAALFM_C109730WA	C1_09730W_A	DAM1	0.0769758	0.486404
CAALFM_C109740CA	C1_09740C_A		0.221584	0.187448
CAALFM_C109750WA	C1_09750W_A		0.16831	0.0588477
CAALFM_C109760CA	C1_09760C_A	SHY1	-0.125584	0.203146
CAALFM_C109770WA	C1_09770W_A		0.197734	0.358032
CAALFM_C109780CA	C1_09780C_A		0.0520103	0.592967
CAALFM_C109790CA	C1_09790C_A		0.0873421	0.407981
CAALFM_C109800CA	C1_09800C_A	TVP18	0.139113	0.141907
CAALFM_C109810WA	C1_09810W_A		-0.245671	0.0685163
CAALFM_C109820CA	C1_09820C_A		NA	NA
CAALFM_C109830WA	C1_09830W_A	SKI3	-0.0185438	0.835893
CAALFM_C109840CA	C1_09840C_A		0.229666	0.0418034
CAALFM_C109850CA	C1_09850C_A		0.0760262	0.458249
CAALFM_C109860CA	C1_09860C_A	TFA1	-0.123581	0.206325
CAALFM_C109870WA	C1_09870W_A	HCM1	-0.0047583	0.97198
CAALFM_C109880CA	C1_09880C_A	BUD31	0.00278589	0.981931
CAALFM_C109890CA	C1_09890C_A	BUD31	0.483676	0.607485
CAALFM_C109900WA	C1_09900W_A	LIP3	0.514613	0.406285
CAALFM_C109910CA	C1_09910C_A		0.0699072	0.53782
CAALFM_C109920WA	C1_09920W_A	VPS41	0.0901531	0.329638
CAALFM_C109930WA	C1_09930W_A		0.245807	0.376992
CAALFM_C109940WA	C1_09940W_A		0.171327	0.271271
CAALFM_C109950CA	C1_09950C_A		0.161425	0.114456
CAALFM_C109960WA	C1_09960W_A	PET100	-0.20215	0.109157
CAALFM_C109970CA	C1_09970C_A	PDC2	-0.250796	0.0188443
CAALFM_C109980CA	C1_09980C_A		0.0722044	0.479448
CAALFM_C109990WA	C1_09990W_A	SAC1	0.165555	0.055661
CAALFM_C110000CA	C1_10000C_A	CPP1	0.0749343	0.544291
CAALFM_C110010CA	C1_10010C_A	SWE1	-0.0167871	0.87026
CAALFM_C110020WA	C1_10020W_A	SFU1	-0.165624	0.211834
CAALFM_C110030WA	C1_10030W_A	DBP3	-0.402763	1.02e-05
CAALFM_C110040WA	C1_10040W_A	ERO1	-0.0839815	0.364472
CAALFM_C110050WA	C1_10050W_A		-1.08698	0.0867546
CAALFM_C110060CA	C1_10060C_A		0.101435	0.749446
CAALFM_C110070CA	C1_10070C_A	MNN23	-0.140529	0.129218
CAALFM_C110080WA	C1_10080W_A		0.00658628	0.964814
CAALFM_C110090CA	C1_10090C_A		0.167743	0.0686174
CAALFM_C110100CA	C1_10100C_A	NTF2	-0.0378128	0.651476
CAALFM_C110110WA	C1_10110W_A		-0.341091	0.0239759
CAALFM_C110120CA	C1_10120C_A		-0.0437261	0.632063
CAALFM_C110130WA	C1_10130W_A		0.0350254	0.901845
CAALFM_C110140CA	C1_10140C_A		0.233623	0.0461754
CAALFM_C110150WA	C1_10150W_A	WOR1	0.161552	0.562147
CAALFM_C110160WA	C1_10160W_A	MIR1	-0.432042	0.0357304
CAALFM_C110170WA	C1_10170W_A		-0.342463	0.383071
CAALFM_C110180CA	C1_10180C_A	ECM21	0.35847	0.0150883
CAALFM_C110190WA	C1_10190W_A		0.0130328	0.906147
CAALFM_C110200CA	C1_10200C_A		-0.122809	0.214837
CAALFM_C110210CA	C1_10210C_A	CLA4	0.064066	0.512027
CAALFM_C110220CA	C1_10220C_A	TPK1	-0.106504	0.294394
CAALFM_C110230CA	C1_10230C_A		0.125396	0.228085
CAALFM_C110240CA	C1_10240C_A		0.761421	0.00172176
CAALFM_C110250CA	C1_10250C_A		-0.404109	0.0164706
CAALFM_C110260CA	C1_10260C_A	RPA34	-0.254036	0.01687
CAALFM_C110270CA	C1_10270C_A	SFH5	-0.54198	7.37e-11
CAALFM_C110280CA	C1_10280C_A		-0.934707	1.83e-22
CAALFM_C110290WA	C1_10290W_A	GCA1	-0.0211554	0.887679
CAALFM_C110300WA	C1_10300W_A	MNN12	0.251739	0.0296756
CAALFM_C110310WA	C1_10310W_A		0.250242	0.132005
CAALFM_C110320WA	C1_10320W_A		0.201947	0.0507454
CAALFM_C110330CA	C1_10330C_A		-0.0479334	0.656304
CAALFM_C110340WA	C1_10340W_A		0.247313	0.216743
CAALFM_C110350CA	C1_10350C_A		-0.182578	0.0325163
CAALFM_C110360CA	C1_10360C_A		-1.02321	1.48e-23
CAALFM_C110380CA	C1_10380C_A	CBK1	0.0120864	0.913086
CAALFM_C110390CA	C1_10390C_A	RPL42	-0.186266	0.236134
CAALFM_C110400CA	C1_10400C_A	FGR41	-0.0756631	0.626641
CAALFM_C110410WA	C1_10410W_A		-0.239614	0.061294
CAALFM_C110420CA	C1_10420C_A		0.0914439	0.362368
CAALFM_C110430WA	C1_10430W_A	PHO8	-0.2923	0.399339
CAALFM_C110440WA	C1_10440W_A		-0.113816	0.230225
CAALFM_C110450WA	C1_10450W_A	GLY1	0.134018	0.212901
CAALFM_C110460WA	C1_10460W_A		0.219814	0.0399119
CAALFM_C110470WA	C1_10470W_A		-0.413509	0.0226902
CAALFM_C110480WA	C1_10480W_A	DJP1	-0.0333429	0.710845
CAALFM_C110490WA	C1_10490W_A	LKH1	0.213649	0.0188156
CAALFM_C110500WA	C1_10500W_A		0.570484	6.27e-05
CAALFM_C110510WA	C1_10510W_A		0.454603	0.00518754
CAALFM_C110520WA	C1_10520W_A		-0.0269375	0.898206
CAALFM_C110530WA	C1_10530W_A	SNL1	0.155741	0.0966861
CAALFM_C110540CA	C1_10540C_A		0.154576	0.109098
CAALFM_C110550CA	C1_10550C_A	GCA2	0.316936	0.191085
CAALFM_C110560CA	C1_10560C_A		0.254929	0.0387953
CAALFM_C110570CA	C1_10570C_A		1.24626	0.0361353
CAALFM_C110580CA	C1_10580C_A		0.150787	0.455889
CAALFM_C110590WA	C1_10590W_A		-0.0791531	0.828431
CAALFM_C110610WA	C1_10610W_A	FCY23	0.165403	0.0899275
CAALFM_C110620WA	C1_10620W_A		-0.432655	5.12e-05
CAALFM_C110630CA	C1_10630C_A		-0.012274	0.909915
CAALFM_C110640CA	C1_10640C_A	PEA2	0.0666849	0.448574
CAALFM_C110650WA	C1_10650W_A	APN2	-0.0648203	0.560541
CAALFM_C110660WA	C1_10660W_A	TBP1	0.0148583	0.870336
CAALFM_C110670CA	C1_10670C_A	RPA190	-0.369446	9.75e-06
CAALFM_C110680CA	C1_10680C_A		0.182287	0.129117
CAALFM_C110690WA	C1_10690W_A		-0.0103334	0.931419
CAALFM_C110700CA	C1_10700C_A	NIT3	0.0684344	0.46633
CAALFM_C110710CA	C1_10710C_A		0.0330671	0.812382
CAALFM_C110720CA	C1_10720C_A	MNN2	-0.0859565	0.363679
CAALFM_C110730WA	C1_10730W_A		-0.0907738	0.367103
CAALFM_C110740CA	C1_10740C_A	ASR1	0.437247	0.559682
CAALFM_C110750CA	C1_10750C_A		0.0789294	0.439283
CAALFM_C110760WA	C1_10760W_A	VPS23	-0.0882055	0.436869
CAALFM_C110770WA	C1_10770W_A	SFT2	0.110886	0.384437
CAALFM_C110780CA	C1_10780C_A	HNT1	0.0717489	0.587777
CAALFM_C110790WA	C1_10790W_A	CDC48	-0.077859	0.337757
CAALFM_C110800CA	C1_10800C_A	ALP1	-0.295296	0.0173664
CAALFM_C110810WA	C1_10810W_A		-0.264592	0.717682
CAALFM_C110820CA	C1_10820C_A		0.106047	0.273525
CAALFM_C110830WA	C1_10830W_A	BIG1	-0.0803292	0.427912
CAALFM_C110840CA	C1_10840C_A		-0.449199	5.36e-06
CAALFM_C110850WA	C1_10850W_A		-1.03198	0.157752
CAALFM_C110860CA	C1_10860C_A	ADA2	-0.186058	0.095213
CAALFM_C110870WA	C1_10870W_A	RPS17B	-0.234376	0.142274
CAALFM_C110880WA	C1_10880W_A		-0.144766	0.148227
CAALFM_C110890CA	C1_10890C_A		0.201821	0.057527
CAALFM_C110900CA	C1_10900C_A		-0.134556	0.791202
CAALFM_C110910CA	C1_10910C_A		-0.140837	0.19778
CAALFM_C110920WA	C1_10920W_A		-0.0730398	0.561092
CAALFM_C110930CA	C1_10930C_A	UBA4	-0.0998278	0.39103
CAALFM_C110940CA	C1_10940C_A	ERP5	0.162115	0.0922921
CAALFM_C110950CA	C1_10950C_A		-0.0876705	0.375552
CAALFM_C110960WA	C1_10960W_A		-0.0732899	0.481838
CAALFM_C110970WA	C1_10970W_A		-0.313602	0.00070949
CAALFM_C110980WA	C1_10980W_A		-0.0308468	0.930803
CAALFM_C110990CA	C1_10990C_A	RTG3	-0.0556825	0.588534
CAALFM_C111000CA	C1_11000C_A		-0.182139	0.216213
CAALFM_C111010CA	C1_11010C_A		-0.139085	0.194685
CAALFM_C111020WA	C1_11020W_A		0.116828	0.279514
CAALFM_C111030WA	C1_11030W_A	RPL82	-0.201851	0.155191
CAALFM_C111040WA	C1_11040W_A	RPL29	-0.198444	0.227031
CAALFM_C111050WA	C1_11050W_A		0.0363262	0.909399
CAALFM_C111060CA	C1_11060C_A	RPL2	-0.228979	0.131457
CAALFM_C111070WA	C1_11070W_A	PET127	-0.309286	0.0145496
CAALFM_C111080WA	C1_11080W_A		-0.246421	0.00890064
CAALFM_C111090CA	C1_11090C_A		0.0500087	0.62771
CAALFM_C111100WA	C1_11100W_A		-0.269466	0.225215
CAALFM_C111110CA	C1_11110C_A		0.0198597	0.892927
CAALFM_C111120CA	C1_11120C_A		0.190603	0.0373146
CAALFM_C111130WA	C1_11130W_A	FGR16	-0.0121957	0.927269
CAALFM_C111140WA	C1_11140W_A		0.21416	0.0304817
CAALFM_C111150WA	C1_11150W_A		-0.174976	0.11
CAALFM_C111160CA	C1_11160C_A		-0.215936	0.110398
CAALFM_C111170WA	C1_11170W_A	WBP1	0.186595	0.0660856
CAALFM_C111180CA	C1_11180C_A	WBP1	0.930761	0.244329
CAALFM_C111190WA	C1_11190W_A	ARL3	0.111173	0.335601
CAALFM_C111200WA	C1_11200W_A		0.225103	0.344107
CAALFM_C111210CA	C1_11210C_A	HAP43	0.0174877	0.913688
CAALFM_C111220CA	C1_11220C_A	TIM50	-0.35727	0.0190536
CAALFM_C111230WA	C1_11230W_A	FGR39	-0.0780519	0.652959
CAALFM_C111240CA	C1_11240C_A	CHO1	0.0891917	0.343609
CAALFM_C111250WA	C1_11250W_A		0.287082	0.00386716
CAALFM_C111260CA	C1_11260C_A		0.717293	0.0351374
CAALFM_C111270WA	C1_11270W_A		0.067648	0.670273
CAALFM_C111280WA	C1_11280W_A		0.0324155	0.79178
CAALFM_C111290WA	C1_11290W_A		-0.0811	0.624755
CAALFM_C111300CA	C1_11300C_A		0.0161919	0.885176
CAALFM_C111310CA	C1_11310C_A	PSP1	0.175575	0.0493472
CAALFM_C111320CA	C1_11320C_A		-0.380148	0.358533
CAALFM_C111330CA	C1_11330C_A	SMT3	-0.0566374	0.613998
CAALFM_C111340WA	C1_11340W_A	PRM1	0.447747	0.313746
CAALFM_C111350CA	C1_11350C_A	TOS4	0.0661992	0.47472
CAALFM_C111360WA	C1_11360W_A	RPL37B	-0.210683	0.175739
CAALFM_C111370CA	C1_11370C_A		0.0399866	0.709081
CAALFM_C111380WA	C1_11380W_A	NEP1	-0.316001	0.0808485
CAALFM_C111390WA	C1_11390W_A		0.411614	0.437946
CAALFM_C111400CA	C1_11400C_A	GIN4	0.0368554	0.724437
CAALFM_C111410CA	C1_11410C_A		0.0154356	0.952485
CAALFM_C111420WA	C1_11420W_A	KRR1	-0.0927738	0.574495
CAALFM_C111430WA	C1_11430W_A		-0.0937003	0.364649
CAALFM_C111440CA	C1_11440C_A	GIN1	0.00758898	0.94505
CAALFM_C111450CA	C1_11450C_A	SAM2	-0.148106	0.201762
CAALFM_C111470CA	C1_11470C_A	DPP1	0.272033	0.0652343
CAALFM_C111480WA	C1_11480W_A	PHO84	1.1877	3.86e-09
CAALFM_C111490CA	C1_11490C_A	BTA1	0.245787	0.636915
CAALFM_C111500CA	C1_11500C_A	ARO7	0.0671041	0.480427
CAALFM_C111510CA	C1_11510C_A		0.0063477	0.960071
CAALFM_C111520CA	C1_11520C_A	ZCF3	-0.258406	0.0899745
CAALFM_C111530CA	C1_11530C_A		-1.45224	1.01e-14
CAALFM_C111540CA	C1_11540C_A	CTA3	-0.115297	0.204499
CAALFM_C111550WA	C1_11550W_A	GAR1	-0.282302	0.0041951
CAALFM_C111560CA	C1_11560C_A		-0.498152	0.00105348
CAALFM_C111570WA	C1_11570W_A		-1.15337	2.71e-08
CAALFM_C111580WA	C1_11580W_A		-0.991302	1.5e-16
CAALFM_C111590WA	C1_11590W_A	PLD1	0.324327	0.00025144
CAALFM_C111600WA	C1_11600W_A		0.0730133	0.545156
CAALFM_C111610CA	C1_11610C_A		0.147671	0.186517
CAALFM_C111620WA	C1_11620W_A		-0.0769349	0.71815
CAALFM_C111630CA	C1_11630C_A	FUS1	0.521937	0.252998
CAALFM_C111640CA	C1_11640C_A	DPP2	0.0059489	0.954818
CAALFM_C111650WA	C1_11650W_A	EGD1	-0.170011	0.243775
CAALFM_C111660WA	C1_11660W_A	GAD1	0.426262	0.0226855
CAALFM_C111670WA	C1_11670W_A		0.0198213	0.861922
CAALFM_C111680CA	C1_11680C_A		-0.271875	0.0436972
CAALFM_C111690WA	C1_11690W_A		-0.145156	0.204608
CAALFM_C111700CA	C1_11700C_A	MRF1	-1.83453	1.88e-23
CAALFM_C111710CA	C1_11710C_A		-1.67243	0.135109
CAALFM_C111720WA	C1_11720W_A		0.0871317	0.420153
CAALFM_C111730WA	C1_11730W_A		0.0571683	0.569502
CAALFM_C111740WA	C1_11740W_A		-0.0275988	0.842675
CAALFM_C111750WA	C1_11750W_A	AVT4	0.0949257	0.400086
CAALFM_C111760CA	C1_11760C_A		0.0100053	0.936203
CAALFM_C111770CA	C1_11770C_A		0.0747475	0.400352
CAALFM_C111780WA	C1_11780W_A		0.00191886	0.995175
CAALFM_C111790WA	C1_11790W_A		0.0343002	0.785543
CAALFM_C111800CA	C1_11800C_A		0.118931	0.421583
CAALFM_C111810WA	C1_11810W_A	CAS1	-0.0782498	0.483422
CAALFM_C111820WA	C1_11820W_A	CAS1	-1.3846	0.269173
CAALFM_C111830WA	C1_11830W_A	CAS1	0.107516	0.979306
CAALFM_C111850WA	C1_11850W_A		-1.14691	9.6e-05
CAALFM_C111860WA	C1_11860W_A		-0.123763	0.326083
CAALFM_C111870WA	C1_11870W_A	MUP1	0.321402	0.00082785
CAALFM_C111880WA	C1_11880W_A		-0.434922	0.010429
CAALFM_C111890WA	C1_11890W_A		0.423728	0.00044112
CAALFM_C111900CA	C1_11900C_A		-0.105056	0.362009
CAALFM_C111910WA	C1_11910W_A		0.190231	0.212719
CAALFM_C111920WA	C1_11920W_A		0.164099	0.0864039
CAALFM_C111930WA	C1_11930W_A		-2.41e-05	0.999819
CAALFM_C111940CA	C1_11940C_A		-0.0772968	0.561474
CAALFM_C111950WA	C1_11950W_A		0.323695	0.0635621
CAALFM_C111960CA	C1_11960C_A		0.209331	0.0522762
CAALFM_C111970CA	C1_11970C_A		-0.0415091	0.757979
CAALFM_C111980WA	C1_11980W_A	MED10	-0.0210812	0.865699
CAALFM_C111990WA	C1_11990W_A		-0.143879	0.407619
CAALFM_C112000CA	C1_12000C_A		0.144722	0.678916
CAALFM_C112010CA	C1_12010C_A	KIP4	0.30153	0.00174543
CAALFM_C112030WA	C1_12030W_A	SER33	0.193351	0.020292
CAALFM_C112040WA	C1_12040W_A		-0.16538	0.887938
CAALFM_C112050WA	C1_12050W_A	RPN2	-0.10815	0.210848
CAALFM_C112060CA	C1_12060C_A		-1.38284	4.7e-26
CAALFM_C112070CA	C1_12070C_A		-1.25539	1.56e-38
CAALFM_C112080WA	C1_12080W_A	LCB4	-0.38733	7.23e-05
CAALFM_C112090CA	C1_12090C_A		-0.319832	0.717355
CAALFM_C112100CA	C1_12100C_A	PXA2	0.0890986	0.453719
CAALFM_C112110CA	C1_12110C_A		0.155416	0.373764
CAALFM_C112120WA	C1_12120W_A		0.0616057	0.600271
CAALFM_C112130CA	C1_12130C_A	ZCF30	-0.179283	0.110286
CAALFM_C112140WA	C1_12140W_A		-0.0491221	0.803696
CAALFM_C112150CA	C1_12150C_A		-0.135087	0.386604
CAALFM_C112160WA	C1_12160W_A	MSO1	0.4109	0.00037938
CAALFM_C112170CA	C1_12170C_A		-0.0577879	0.581788
CAALFM_C112180CA	C1_12180C_A		-0.0690666	0.450416
CAALFM_C112190WA	C1_12190W_A	BUL4	-0.191187	0.104304
CAALFM_C112200WA	C1_12200W_A	MCD4	0.238771	0.00775332
CAALFM_C112210WA	C1_12210W_A	TRP3	0.0511779	0.692771
CAALFM_C112220WA	C1_12220W_A	CDC6	-0.0057741	0.960432
CAALFM_C112230WA	C1_12230W_A	SNT1	0.029632	0.734168
CAALFM_C112240CA	C1_12240C_A		-0.501702	0.00012757
CAALFM_C112250CA	C1_12250C_A		-0.101377	0.450136
CAALFM_C112260WA	C1_12260W_A	VPH2	0.00558079	0.964814
CAALFM_C112270WA	C1_12270W_A	SRT1	-0.0148959	0.906254
CAALFM_C112280CA	C1_12280C_A		-0.459442	0.0310637
CAALFM_C112290CA	C1_12290C_A	RBD1	-0.0056244	0.952892
CAALFM_C112310CA	C1_12310C_A	CSI2	-0.283557	0.00904359
CAALFM_C112320CA	C1_12320C_A	ATP19	-0.299472	0.133155
CAALFM_C112330WA	C1_12330W_A		-0.199962	0.864279
CAALFM_C112340CA	C1_12340C_A	MRPS9	-0.342205	0.036761
CAALFM_C112350WA	C1_12350W_A		-0.142545	0.115118
CAALFM_C112360CA	C1_12360C_A	RIB3	-0.46762	2.54e-08
CAALFM_C112370WA	C1_12370W_A		-0.332892	0.0198684
CAALFM_C112380CA	C1_12380C_A	WRS1	-0.157007	0.202441
CAALFM_C112390CA	C1_12390C_A	RPL27A	-0.219252	0.168976
CAALFM_C112400CA	C1_12400C_A		0.146763	0.283119
CAALFM_C112410CA	C1_12410C_A	PKH2	0.106499	0.341349
CAALFM_C112430WA	C1_12430W_A		0.00924064	0.918145
CAALFM_C112440WA	C1_12440W_A		0.281216	0.157858
CAALFM_C112450CA	C1_12450C_A	IRA2	-0.0751216	0.469126
CAALFM_C112470WA	C1_12470W_A		-0.103574	0.604741
CAALFM_C112480WA	C1_12480W_A		-0.0998606	0.515054
CAALFM_C112490WA	C1_12490W_A	PEP1	0.226061	0.0295246
CAALFM_C112500CA	C1_12500C_A	PEP1	-1.86577	0.478098
CAALFM_C112510WA	C1_12510W_A	RAX2	0.129364	0.159235
CAALFM_C112520WA	C1_12520W_A	GSG1	-0.136272	0.171806
CAALFM_C112530CA	C1_12530C_A		0.0557693	0.59259
CAALFM_C112540WA	C1_12540W_A		-0.127722	0.366488
CAALFM_C112550CA	C1_12550C_A	CDC54	0.0260847	0.800744
CAALFM_C112560CA	C1_12560C_A	DLH1	0.282719	0.539117
CAALFM_C112570CA	C1_12570C_A		0.00132838	0.993896
CAALFM_C112580WA	C1_12580W_A		0.0796569	0.418638
CAALFM_C112590WA	C1_12590W_A	ATP20	-0.272912	0.209713
CAALFM_C112600CA	C1_12600C_A	CHR1	-0.052486	0.741414
CAALFM_C112610WA	C1_12610W_A		-0.521176	0.00566569
CAALFM_C112620WA	C1_12620W_A	SPA2	-0.0221646	0.803549
CAALFM_C112630CA	C1_12630C_A		0.243637	0.107581
CAALFM_C112640WA	C1_12640W_A		-0.218922	0.073814
CAALFM_C112650CA	C1_12650C_A		0.0954481	0.368003
CAALFM_C112660WA	C1_12660W_A		0.0940929	0.328963
CAALFM_C112670CA	C1_12670C_A		-0.0498447	0.679811
CAALFM_C112680WA	C1_12680W_A		-0.180423	0.0808014
CAALFM_C112690CA	C1_12690C_A		-0.0335367	0.855669
CAALFM_C112700WA	C1_12700W_A		0.362069	0.0117473
CAALFM_C112710CA	C1_12710C_A		0.154532	0.0991968
CAALFM_C112720CA	C1_12720C_A		0.603059	0.323705
CAALFM_C112730WA	C1_12730W_A	RVS162	-0.166754	0.252334
CAALFM_C112740WA	C1_12740W_A		0.0562784	0.534261
CAALFM_C112750CA	C1_12750C_A		-0.0573095	0.643281
CAALFM_C112760WA	C1_12760W_A		-0.29787	0.0050908
CAALFM_C112770WA	C1_12770W_A	RPG1A	-0.132176	0.246138
CAALFM_C112780WA	C1_12780W_A	RBK1	0.204801	0.0196019
CAALFM_C112790CA	C1_12790C_A	FEN1	0.0912658	0.325453
CAALFM_C112800WA	C1_12800W_A		0.102888	0.59045
CAALFM_C112810WA	C1_12810W_A		0.0352938	0.733218
CAALFM_C112820CA	C1_12820C_A		-0.128029	0.184885
CAALFM_C112830CA	C1_12830C_A		0.0802733	0.48947
CAALFM_C112840WA	C1_12840W_A		0.0473108	0.748992
CAALFM_C112850WA	C1_12850W_A	BLP1	1.01914	5.4e-05
CAALFM_C112860CA	C1_12860C_A		0.176734	0.209227
CAALFM_C112870CA	C1_12870C_A		0.113518	0.474799
CAALFM_C112880CA	C1_12880C_A		0.382824	0.0144818
CAALFM_C112900WA	C1_12900W_A		0.0183458	0.858616
CAALFM_C112910WA	C1_12910W_A		0.551555	0.00258203
CAALFM_C112920CA	C1_12920C_A		0.228142	0.0231929
CAALFM_C112930CA	C1_12930C_A		0.12437	0.506011
CAALFM_C112940CA	C1_12940C_A		0.310629	0.593877
CAALFM_C112950WA	C1_12950W_A		-0.0143645	0.880952
CAALFM_C112960CA	C1_12960C_A	BNI1	0.0949468	0.256555
CAALFM_C112970CA	C1_12970C_A	SEC2	0.0615413	0.608422
CAALFM_C112980WA	C1_12980W_A	SEC2	-0.0341542	0.922243
CAALFM_C112990WA	C1_12990W_A	SEC2	0.0984442	0.506134
CAALFM_C113000WA	C1_13000W_A	SEC2	-0.0993664	0.58168
CAALFM_C113010WA	C1_13010W_A		-0.265402	0.0519942
CAALFM_C113020CA	C1_13020C_A	SPC3	0.304525	0.00685503
CAALFM_C113030CA	C1_13030C_A		-0.0333655	0.811973
CAALFM_C113040CA	C1_13040C_A		-0.11371	0.790237
CAALFM_C113050WA	C1_13050W_A	RPL14	-0.170014	0.259868
CAALFM_C113060CA	C1_13060C_A		-0.638817	0.00920846
CAALFM_C113070CA	C1_13070C_A	FAD3	-0.317651	0.207005
CAALFM_C113080WA	C1_13080W_A	OP4	0.888562	0.500831
CAALFM_C113100WA	C1_13100W_A		0.729382	0.00038607
CAALFM_C113110CA	C1_13110C_A	CHS3	-0.330093	5.61e-05
CAALFM_C113120CA	C1_13120C_A	MON2	0.048046	0.611214
CAALFM_C113130CA	C1_13130C_A		-0.184849	0.0633207
CAALFM_C113140CA	C1_13140C_A	TYE7	-0.0802967	0.32803
CAALFM_C113160WA	C1_13160W_A	PSA2	0.517001	0.00037832
CAALFM_C113170CA	C1_13170C_A	MSH6	0.0217383	0.833864
CAALFM_C113180WA	C1_13180W_A		-0.430737	0.25456
CAALFM_C113190WA	C1_13190W_A		0.0979421	0.467397
CAALFM_C113200CA	C1_13200C_A	REX3	-0.200832	0.11282
CAALFM_C113220CA	C1_13220C_A	AKR1	0.0532933	0.592063
CAALFM_C113240WA	C1_13240W_A		0.0611722	0.62062
CAALFM_C113250WA	C1_13250W_A		-0.129507	0.172113
CAALFM_C113260WA	C1_13260W_A		-0.158494	0.0656078
CAALFM_C113270WA	C1_13270W_A		0.375292	0.00745308
CAALFM_C113280CA	C1_13280C_A		-0.0566823	0.539437
CAALFM_C113290WA	C1_13290W_A		-1.04587	0.0568911
CAALFM_C113300CA	C1_13300C_A	RPN1	-0.102783	0.205371
CAALFM_C113310WA	C1_13310W_A	ECM25	-0.10907	0.30581
CAALFM_C113320CA	C1_13320C_A		-0.0392467	0.699114
CAALFM_C113330CA	C1_13330C_A		0.0692371	0.424037
CAALFM_C113350WA	C1_13350W_A	STP2	0.00352451	0.967537
CAALFM_C113360CA	C1_13360C_A	RMP1	0.0459193	0.791915
CAALFM_C113370WA	C1_13370W_A		-0.0890722	0.384049
CAALFM_C113380WA	C1_13380W_A		0.0327038	0.857005
CAALFM_C113390WA	C1_13390W_A		0.153148	0.334836
CAALFM_C113400CA	C1_13400C_A	AGC1	-0.0750031	0.568767
CAALFM_C113410WA	C1_13410W_A	COX19	-0.575083	0.00302245
CAALFM_C113420CA	C1_13420C_A	KEM1	0.0508386	0.549849
CAALFM_C113430CA	C1_13430C_A		0.267164	0.37224
CAALFM_C113440CA	C1_13440C_A	OFI1	0.854737	0.0110451
CAALFM_C113450WA	C1_13450W_A	HYR1	0.305835	0.00082361
CAALFM_C113470WA	C1_13470W_A	KNS1	0.187682	0.34043
CAALFM_C113480WA	C1_13480W_A	HSP70	0.210029	0.298776
CAALFM_C113490CA	C1_13490C_A		0.102797	0.347619
CAALFM_C113500CA	C1_13500C_A		-0.566968	0.0564541
CAALFM_C113510CA	C1_13510C_A	TGL99	0.200663	0.0490154
CAALFM_C113520CA	C1_13520C_A	MCU1	0.0579182	0.684329
CAALFM_C113530WA	C1_13530W_A	NA	0.313812	0.00649541
CAALFM_C113540WA	C1_13540W_A	GUP1	0.0759579	0.492874
CAALFM_C113550CA	C1_13550C_A	NUP49	-0.0581472	0.560409
CAALFM_C113560WA	C1_13560W_A		0.0419614	0.714641
CAALFM_C113570WA	C1_13570W_A	MPT5	0.158569	0.0867389
CAALFM_C113580WA	C1_13580W_A	SEC18	0.148994	0.0923779
CAALFM_C113590WA	C1_13590W_A		-0.0772814	0.767833
CAALFM_C113600WA	C1_13600W_A		0.297187	0.281559
CAALFM_C113610CA	C1_13610C_A	KIS2	0.0325348	0.766874
CAALFM_C113620WA	C1_13620W_A	ROB1	0.304374	0.00404247
CAALFM_C113630WA	C1_13630W_A	CYB2	-0.315613	0.0222941
CAALFM_C113640WA	C1_13640W_A	CUP2	-0.0572068	0.58277
CAALFM_C113650CA	C1_13650C_A		0.129196	0.248102
CAALFM_C113660WA	C1_13660W_A	RAD54	-0.130246	0.194552
CAALFM_C113670WA	C1_13670W_A	OSM2	-0.577933	0.00807161
CAALFM_C113680CA	C1_13680C_A	GCV3	0.87014	1.79e-25
CAALFM_C113690CA	C1_13690C_A		-0.0344912	0.717663
CAALFM_C113700WA	C1_13700W_A	ACT1	0.105721	0.201963
CAALFM_C113710CA	C1_13710C_A	DAD1	0.102475	0.541076
CAALFM_C113720WA	C1_13720W_A		-0.289961	0.00969104
CAALFM_C113730CA	C1_13730C_A	DIM1	-0.272333	0.0522136
CAALFM_C113740WA	C1_13740W_A	KAR9	0.261636	0.00488025
CAALFM_C113750CA	C1_13750C_A		0.00708136	0.964149
CAALFM_C113760WA	C1_13760W_A	AGM1	0.173318	0.0565646
CAALFM_C113770CA	C1_13770C_A		0.0844244	0.583591
CAALFM_C113780WA	C1_13780W_A	MYO2	0.0689783	0.484788
CAALFM_C113790CA	C1_13790C_A		-0.0464929	0.665505
CAALFM_C113800CA	C1_13800C_A	DUR32	-0.101155	0.557507
CAALFM_C113810WA	C1_13810W_A		0.198551	0.167333
CAALFM_C113820CA	C1_13820C_A		-0.0279239	0.843581
CAALFM_C113830CA	C1_13830C_A	PDX1	-0.182526	0.0270313
CAALFM_C113840WA	C1_13840W_A		0.229966	0.0401479
CAALFM_C113850CA	C1_13850C_A	DAL7	0.142533	0.748407
CAALFM_C113860CA	C1_13860C_A	GND1	-0.0219146	0.845216
CAALFM_C113870WA	C1_13870W_A	MET3	0.992522	0.0169514
CAALFM_C113880CA	C1_13880C_A		0.188201	0.0937184
CAALFM_C113890CA	C1_13890C_A		-0.611536	0.642542
CAALFM_C113900CA	C1_13900C_A	LCB2	0.0216215	0.810242
CAALFM_C113910CA	C1_13910C_A	MODF	0.309592	0.0317431
CAALFM_C113920WA	C1_13920W_A	DOS2	0.25592	0.00375312
CAALFM_C113930WA	C1_13930W_A	SSK1	-0.0185659	0.846825
CAALFM_C113940WA	C1_13940W_A	SIM1	-0.189178	0.0279662
CAALFM_C113950CA	C1_13950C_A		0.163225	0.331427
CAALFM_C113960WA	C1_13960W_A	YBP1	0.00421214	0.967004
CAALFM_C113970CA	C1_13970C_A	HPC2	0.0742778	0.532292
CAALFM_C113980CA	C1_13980C_A	DUR7	0.0123663	0.922057
CAALFM_C113990WA	C1_13990W_A	OCA6	0.066499	0.616638
CAALFM_C114000CA	C1_14000C_A	DOA4	-0.567643	2.03e-06
CAALFM_C114010WA	C1_14010W_A	CSK1	0.728773	0.727047
CAALFM_C114020WA	C1_14020W_A		-1.01889	0.0600644
CAALFM_C114030WA	C1_14030W_A		-0.0710391	0.694043
CAALFM_C114040WA	C1_14040W_A		-0.011352	0.902006
CAALFM_C114050CA	C1_14050C_A		-0.0902053	0.408785
CAALFM_C114060WA	C1_14060W_A		0.194156	0.236453
CAALFM_C114080WA	C1_14080W_A		-0.37251	1.79e-05
CAALFM_C114090WA	C1_14090W_A		-0.50668	0.015968
CAALFM_C114100WA	C1_14100W_A	YPT52	0.132961	0.180119
CAALFM_C114110CA	C1_14110C_A	RPL4B	-0.30222	0.0264471
CAALFM_C114120CA	C1_14120C_A	RBE1	-0.0322703	0.854626
CAALFM_C114130WA	C1_14130W_A	FTR1	0.549096	0.00776977
CAALFM_C114140CA	C1_14140C_A	SET3	0.740307	0.00416248
CAALFM_C114150CA	C1_14150C_A	PAM16	-0.24512	0.124176
CAALFM_C114160WA	C1_14160W_A		-0.254831	0.0333603
CAALFM_C114170WA	C1_14170W_A		0.0715812	0.423137
CAALFM_C114180WA	C1_14180W_A		-0.156108	0.419914
CAALFM_C114190CA	C1_14190C_A		-0.27777	0.262909
CAALFM_C114200WA	C1_14200W_A		0.0483072	0.65936
CAALFM_C114210CA	C1_14210C_A	IML2	0.295824	0.0183289
CAALFM_C114220CA	C1_14220C_A	FTR2	0.0905834	0.760721
CAALFM_C114230CA	C1_14230C_A	IRR1	-0.0830405	0.439737
CAALFM_C114240WA	C1_14240W_A		-0.0141929	0.869508
CAALFM_C114250CA	C1_14250C_A		-0.281311	0.00261084
CAALFM_C114260CA	C1_14260C_A	TIF35	-0.197798	0.0681789
CAALFM_C114270WA	C1_14270W_A		0.0365308	0.763874
CAALFM_C114280CA	C1_14280C_A	NPL3	0.0544673	0.569212
CAALFM_C114290CA	C1_14290C_A	MDG1	0.0176648	0.843202
CAALFM_C114300CA	C1_14300C_A	NCR1	0.358048	0.0386519
CAALFM_C114310WA	C1_14310W_A		0.00633655	0.955225
CAALFM_C114320CA	C1_14320C_A		0.235705	0.00833234
CAALFM_C114330WA	C1_14330W_A		-0.140317	0.174958
CAALFM_C114340CA	C1_14340C_A	RIM101	-0.167439	0.0771994
CAALFM_C114350WA	C1_14350W_A		-0.189607	0.0623451
CAALFM_C114360CA	C1_14360C_A	WSC4	-0.176578	0.0800339
CAALFM_C114380CA	C1_14380C_A		-0.179397	0.073449
CAALFM_C114390WA	C1_14390W_A	RPC10	-0.450043	0.00076501
CAALFM_C114400CA	C1_14400C_A	MLH3	-0.0978864	0.346555
CAALFM_C114410WA	C1_14410W_A		-0.203924	0.0994547
CAALFM_C114420WA	C1_14420W_A	DDI1	-0.0101624	0.917013
CAALFM_C114430CA	C1_14430C_A		-0.0041285	0.965981
CAALFM_C114440CA	C1_14440C_A	GDI1	0.237125	0.0102292
CAALFM_C114450CA	C1_14450C_A		-0.0368911	0.66732
CAALFM_C114460WA	C1_14460W_A		-0.0647165	0.456462
CAALFM_C114470WA	C1_14470W_A		0.0310112	0.71918
CAALFM_C114480WA	C1_14480W_A		0.0762778	0.545379
CAALFM_C114490CA	C1_14490C_A	SAM35	0.0364548	0.790298
CAALFM_C114500CA	C1_14500C_A		-0.0112392	0.895208
CAALFM_C114520WA	C1_14520W_A		-0.0535168	0.532388
CAALFM_C114530WA	C1_14530W_A		0.104478	0.211761
CAALFM_C114550CA	C1_14550C_A		0.166106	0.167963
CAALFM_C114560CA	C1_14560C_A		0.15231	0.150218
CAALFM_C114570CA	C1_14570C_A	FGR24	0.104338	0.33721
CAALFM_C114580CA	C1_14580C_A		0.0788028	0.498162
CAALFM_C114590CA	C1_14590C_A	TLO4	0.0112184	0.907718
CAALFM_C114630CA	C1_14630C_A		0.0480704	0.629825
CAALFM_C200010WA	C2_00010W_A	TLO5	0.228791	0.0550754
CAALFM_C200030WA	C2_00030W_A	RRN3	-0.135176	0.204503
CAALFM_C200040CA	C2_00040C_A	RRN3	NA	NA
CAALFM_C200050CA	C2_00050C_A		-0.151388	0.927017
CAALFM_C200060CA	C2_00060C_A		0.0291605	0.766578
CAALFM_C200070CA	C2_00070C_A	MPP10	-0.370391	9.81e-05
CAALFM_C200080CA	C2_00080C_A	FAV3	0.0626831	0.623626
CAALFM_C200090WA	C2_00090W_A		-0.0528987	0.647997
CAALFM_C200100CA	C2_00100C_A	PGA52	-0.0322551	0.798392
CAALFM_C200110WA	C2_00110W_A		0.164978	0.229528
CAALFM_C200120CA	C2_00120C_A	EMC9	-0.0119939	0.9061
CAALFM_C200140WA	C2_00140W_A	NDT80	-0.179001	0.0669003
CAALFM_C200150WA	C2_00150W_A	LEU5	-0.0745206	0.55632
CAALFM_C200160CA	C2_00160C_A	NAT2	-0.323693	0.0122806
CAALFM_C200170CA	C2_00170C_A		-0.351964	0.00481222
CAALFM_C200180CA	C2_00180C_A		0.740018	0.00234946
CAALFM_C200190CA	C2_00190C_A		-0.0272366	0.786666
CAALFM_C200200WA	C2_00200W_A		-0.121	0.286845
CAALFM_C200210WA	C2_00210W_A	RPL38	-0.133548	0.411939
CAALFM_C200220CA	C2_00220C_A		0.00265527	0.97619
CAALFM_C200230WA	C2_00230W_A		-0.0828873	0.396093
CAALFM_C200240CA	C2_00240C_A	SOD6	0.0637078	0.640198
CAALFM_C200250WA	C2_00250W_A	STF2	0.279712	0.238016
CAALFM_C200260CA	C2_00260C_A	MUQ1	-0.102644	0.224361
CAALFM_C200270CA	C2_00270C_A		-0.155101	0.131213
CAALFM_C200280CA	C2_00280C_A		-0.388924	0.0239208
CAALFM_C200290WA	C2_00290W_A		-0.342097	0.0143862
CAALFM_C200300CA	C2_00300C_A	CKB1	-0.0676395	0.475393
CAALFM_C200310WA	C2_00310W_A		NA	NA
CAALFM_C200320WA	C2_00320W_A		0.0687798	0.53185
CAALFM_C200330CA	C2_00330C_A	HIR1	0.0351025	0.726167
CAALFM_C200340CA	C2_00340C_A	ARO8	0.269394	0.00129819
CAALFM_C200350WA	C2_00350W_A		-0.0290578	0.777797
CAALFM_C200360CA	C2_00360C_A		-0.0004512	0.995958
CAALFM_C200370WA	C2_00370W_A	PDR6	-0.195216	0.0568536
CAALFM_C200380CA	C2_00380C_A	RFA1	0.00423902	0.971203
CAALFM_C200390CA	C2_00390C_A		0.0527183	0.581454
CAALFM_C200400CA	C2_00400C_A		-0.298178	0.193727
CAALFM_C200410CA	C2_00410C_A		-0.165646	0.189728
CAALFM_C200420WA	C2_00420W_A		0.230364	0.0686147
CAALFM_C200430CA	C2_00430C_A	DPB4	0.145086	0.157834
CAALFM_C200440WA	C2_00440W_A	SAS2	0.235236	0.0414945
CAALFM_C200450CA	C2_00450C_A	CDH1	0.0845457	0.394206
CAALFM_C200460WA	C2_00460W_A	SAP30	-0.193142	0.57727
CAALFM_C200470WA	C2_00470W_A	POM152	-0.105273	0.265123
CAALFM_C200480CA	C2_00480C_A	PHHB	0.156637	0.278084
CAALFM_C200490WA	C2_00490W_A		0.125638	0.150814
CAALFM_C200500WA	C2_00500W_A	ZCF9	0.0717677	0.574235
CAALFM_C200510WA	C2_00510W_A		0.0621941	0.736799
CAALFM_C200520WA	C2_00520W_A	DFG5	-0.0135366	0.87311
CAALFM_C200540WA	C2_00540W_A		-0.614357	0.0148829
CAALFM_C200550WA	C2_00550W_A		0.148509	0.360761
CAALFM_C200560WA	C2_00560W_A		0.699789	0.779063
CAALFM_C200570WA	C2_00570W_A		0.0514151	0.636492
CAALFM_C200580CA	C2_00580C_A	SMF3	0.261899	0.00190362
CAALFM_C200590WA	C2_00590W_A		0.031566	0.828924
CAALFM_C200600CA	C2_00600C_A		-0.838814	3.81e-10
CAALFM_C200610CA	C2_00610C_A	ATP18	-0.133398	0.438212
CAALFM_C200620CA	C2_00620C_A		-0.200751	0.210508
CAALFM_C200630CA	C2_00630C_A		0.239284	0.162719
CAALFM_C200640WA	C2_00640W_A		-0.100644	0.36185
CAALFM_C200650WA	C2_00650W_A		-0.222693	0.0385138
CAALFM_C200660CA	C2_00660C_A	SOD4	0.780647	0.0198324
CAALFM_C200680CA	C2_00680C_A	SOD5	1.73288	2.45e-08
CAALFM_C200690WA	C2_00690W_A		0.173474	0.425704
CAALFM_C200700WA	C2_00700W_A		-0.409479	0.00378332
CAALFM_C200710WA	C2_00710W_A	NPL6	0.0146927	0.884621
CAALFM_C200720CA	C2_00720C_A	FGR15	0.0381046	0.715545
CAALFM_C200730CA	C2_00730C_A		0.00118084	0.991283
CAALFM_C200740CA	C2_00740C_A		0.191722	0.166853
CAALFM_C200750WA	C2_00750W_A		-0.463437	0.0577
CAALFM_C200760CA	C2_00760C_A		-3.60886	2.63e-225
CAALFM_C200770WA	C2_00770W_A		0.00478864	0.965765
CAALFM_C200780WA	C2_00780W_A	POT1-2	-0.286459	0.0176329
CAALFM_C200790CA	C2_00790C_A		-0.353566	0.001816
CAALFM_C200800CA	C2_00800C_A	PGA27	-0.174504	0.275244
CAALFM_C200810CA	C2_00810C_A		-0.120113	0.313296
CAALFM_C200820WA	C2_00820W_A		-0.183817	0.133718
CAALFM_C200830CA	C2_00830C_A		-0.0506192	0.591604
CAALFM_C200840WA	C2_00840W_A		-0.0634941	0.518129
CAALFM_C200850WA	C2_00850W_A	MSF1	-0.40991	0.0225946
CAALFM_C200860CA	C2_00860C_A		0.00032539	0.997772
CAALFM_C200870WA	C2_00870W_A		0.0209621	0.829027
CAALFM_C200880WA	C2_00880W_A		0.169069	0.109413
CAALFM_C200890WA	C2_00890W_A		-0.0819384	0.804582
CAALFM_C200900WA	C2_00900W_A		-2.4516	0.406206
CAALFM_C200910WA	C2_00910W_A	PGA19	-0.993782	0.0803951
CAALFM_C200920WA	C2_00920W_A		0.0165858	0.926954
CAALFM_C200930CA	C2_00930C_A	VPS24	0.0177205	0.867135
CAALFM_C200940WA	C2_00940W_A		0.13708	0.420484
CAALFM_C200950CA	C2_00950C_A	RFC5	0.0253555	0.801902
CAALFM_C200960CA	C2_00960C_A	MXR1	-0.0413399	0.74505
CAALFM_C200970CA	C2_00970C_A	UBP13	0.0989837	0.253134
CAALFM_C201000WA	C2_01000W_A	HGT7	0.0436936	0.606017
CAALFM_C201010WA	C2_01010W_A	HGT8	-0.357389	0.00025642
CAALFM_C201020WA	C2_01020W_A	HGT6	0.523506	7.75e-11
CAALFM_C201030WA	C2_01030W_A		-0.425225	0.0255122
CAALFM_C201040WA	C2_01040W_A		0.135855	0.514169
CAALFM_C201050WA	C2_01050W_A		-0.0377741	0.84392
CAALFM_C201060CA	C2_01060C_A		-0.151483	0.366795
CAALFM_C201070WA	C2_01070W_A		-0.214135	0.0536738
CAALFM_C201080CA	C2_01080C_A		-0.871159	0.774195
CAALFM_C201090CA	C2_01090C_A	ERG28	0.0732727	0.440585
CAALFM_C201110CA	C2_01110C_A	BCY1	0.164054	0.0711581
CAALFM_C201120WA	C2_01120W_A	KAR2	0.283121	0.00891042
CAALFM_C201130WA	C2_01130W_A	NOT3	-0.134481	0.260875
CAALFM_C201140CA	C2_01140C_A		1.28203	0.465508
CAALFM_C201150WA	C2_01150W_A	PEX12	0.130214	0.221151
CAALFM_C201160WA	C2_01160W_A		-0.21381	0.0903758
CAALFM_C201170CA	C2_01170C_A		-0.145326	0.189742
CAALFM_C201180WA	C2_01180W_A	COX17	-1.02901	8.85e-07
CAALFM_C201190CA	C2_01190C_A		-0.0100551	0.940485
CAALFM_C201200CA	C2_01200C_A	REG1	-0.0247218	0.774818
CAALFM_C201210CA	C2_01210C_A	HNM1	-0.50942	3.51e-07
CAALFM_C201220WA	C2_01220W_A		-0.0553743	0.535066
CAALFM_C201230WA	C2_01230W_A		0.110705	0.460735
CAALFM_C201240CA	C2_01240C_A		0.0739762	0.555102
CAALFM_C201250WA	C2_01250W_A		0.523458	1.86e-05
CAALFM_C201260WA	C2_01260W_A		0.293561	0.0298872
CAALFM_C201270WA	C2_01270W_A	CHA1	1.78986	1.91e-37
CAALFM_C201290CA	C2_01290C_A	CHA1	-0.961871	0.367598
CAALFM_C201300CA	C2_01300C_A	MNN24	0.280056	0.00488483
CAALFM_C201310WA	C2_01310W_A		-0.094834	0.30502
CAALFM_C201320WA	C2_01320W_A		-0.0502415	0.629151
CAALFM_C201330CA	C2_01330C_A	SIR2	0.179589	0.111924
CAALFM_C201340WA	C2_01340W_A		-0.0750634	0.394206
CAALFM_C201350CA	C2_01350C_A	SNX4	0.207527	0.0625713
CAALFM_C201360CA	C2_01360C_A	DCW1	-0.0516897	0.53349
CAALFM_C201370CA	C2_01370C_A		-0.0510584	0.596218
CAALFM_C201380WA	C2_01380W_A	PLB4.5	1.01987	7.25e-06
CAALFM_C201390WA	C2_01390W_A		-0.0412752	0.653731
CAALFM_C201400CA	C2_01400C_A	ESC4	0.0471292	0.659724
CAALFM_C201410CA	C2_01410C_A	CLB2	0.162065	0.0493251
CAALFM_C201420CA	C2_01420C_A		0.113522	0.375
CAALFM_C201430WA	C2_01430W_A	APT1	-0.0121168	0.899975
CAALFM_C201440CA	C2_01440C_A		0.120218	0.335471
CAALFM_C201450CA	C2_01450C_A		-0.520145	0.302957
CAALFM_C201460CA	C2_01460C_A		-0.157973	0.850521
CAALFM_C201470WA	C2_01470W_A	SRB9	-0.036575	0.706811
CAALFM_C201480WA	C2_01480W_A	SPT5	-0.0252908	0.783589
CAALFM_C201490CA	C2_01490C_A		0.0562322	0.555648
CAALFM_C201500WA	C2_01500W_A		0.296419	0.10879
CAALFM_C201510CA	C2_01510C_A		-0.179101	0.141668
CAALFM_C201520WA	C2_01520W_A	PPE1	0.0370322	0.738192
CAALFM_C201530CA	C2_01530C_A		-0.0929483	0.281872
CAALFM_C201540WA	C2_01540W_A		0.558119	0.00154507
CAALFM_C201550WA	C2_01550W_A	SMP2	0.294722	0.00789932
CAALFM_C201560WA	C2_01560W_A	BMT5	0.408008	3.38e-05
CAALFM_C201570WA	C2_01570W_A		0.129907	0.552272
CAALFM_C201580WA	C2_01580W_A	REX2	-0.232848	0.119497
CAALFM_C201590WA	C2_01590W_A	COX13	-0.243303	0.22228
CAALFM_C201600CA	C2_01600C_A	CDC55	0.0567508	0.505823
CAALFM_C201610CA	C2_01610C_A	RPS26A	-0.215869	0.165033
CAALFM_C201620WA	C2_01620W_A	COX4	-0.173545	0.35039
CAALFM_C201630WA	C2_01630W_A		-0.515808	0.00507505
CAALFM_C201640WA	C2_01640W_A	SLA1	-0.0581567	0.475607
CAALFM_C201650WA	C2_01650W_A		0.0748181	0.725225
CAALFM_C201660CA	C2_01660C_A		0.100744	0.321834
CAALFM_C201670CA	C2_01670C_A	STT3	0.156461	0.0860242
CAALFM_C201680CA	C2_01680C_A		0.0714072	0.441193
CAALFM_C201690WA	C2_01690W_A		-0.0828315	0.559938
CAALFM_C201700CA	C2_01700C_A	HAP42	-0.212505	0.0361408
CAALFM_C201710WA	C2_01710W_A	HSK3	0.143372	0.276526
CAALFM_C201720CA	C2_01720C_A		-0.190413	0.130192
CAALFM_C201730WA	C2_01730W_A		0.256963	0.0864079
CAALFM_C201740CA	C2_01740C_A		-0.488939	0.00375963
CAALFM_C201750CA	C2_01750C_A		0.144362	0.226997
CAALFM_C201760CA	C2_01760C_A		0.0659085	0.734091
CAALFM_C201770CA	C2_01770C_A		-1.27913	0.495614
CAALFM_C201780WA	C2_01780W_A	MSB2	0.148479	0.150716
CAALFM_C201800WA	C2_01800W_A		0.388306	0.117336
CAALFM_C201820CA	C2_01820C_A		-0.0509027	0.651798
CAALFM_C201830WA	C2_01830W_A	PRP39	-0.0552991	0.649163
CAALFM_C201840CA	C2_01840C_A	RAD7	-0.223774	0.0562353
CAALFM_C201850WA	C2_01850W_A	RAD23	-0.0610001	0.47341
CAALFM_C201860CA	C2_01860C_A		0.0341854	0.794512
CAALFM_C201870CA	C2_01870C_A		-0.405008	0.00378489
CAALFM_C201880CA	C2_01880C_A	ZCF6	-0.518109	2.59e-05
CAALFM_C201890WA	C2_01890W_A	CTF1	-0.0359417	0.69042
CAALFM_C201900CA	C2_01900C_A		0.198558	0.071555
CAALFM_C201910WA	C2_01910W_A		0.0444777	0.736529
CAALFM_C201920CA	C2_01920C_A		0.212343	0.0252137
CAALFM_C201930CA	C2_01930C_A		0.337535	0.00026799
CAALFM_C201950CA	C2_01950C_A	AMN1	-0.0327804	0.777655
CAALFM_C201960CA	C2_01960C_A	NA	-0.0027623	0.985108
CAALFM_C201970CA	C2_01970C_A	ROD1	-0.0751942	0.458409
CAALFM_C201980CA	C2_01980C_A	SRD1	0.467338	5.82e-05
CAALFM_C201990CA	C2_01990C_A	FAB1	0.109929	0.348867
CAALFM_C202000WA	C2_02000W_A		0.0680818	0.449769
CAALFM_C202010CA	C2_02010C_A	CHT4	0.121752	0.347174
CAALFM_C202020WA	C2_02020W_A		-0.0101755	0.911376
CAALFM_C202030WA	C2_02030W_A	ARO3	-0.0263034	0.871327
CAALFM_C202040WA	C2_02040W_A		0.0645129	0.482717
CAALFM_C202050CA	C2_02050C_A		0.165451	0.0475188
CAALFM_C202060CA	C2_02060C_A	FMO1	0.09229	0.793549
CAALFM_C202070WA	C2_02070W_A	SPR3	0.117891	0.941561
CAALFM_C202080WA	C2_02080W_A	SPR3	-0.229702	0.339231
CAALFM_C202090WA	C2_02090W_A		0.0529744	0.580471
CAALFM_C202100WA	C2_02100W_A	SNF2	-0.016805	0.836338
CAALFM_C202110CA	C2_02110C_A		0.214713	0.148016
CAALFM_C202120WA	C2_02120W_A		-0.284022	0.0296676
CAALFM_C202130CA	C2_02130C_A		-0.31969	0.452094
CAALFM_C202140CA	C2_02140C_A		0.509996	0.664383
CAALFM_C202150CA	C2_02150C_A		-0.168952	0.0961528
CAALFM_C202160WA	C2_02160W_A	SAM37	-0.0499719	0.645545
CAALFM_C202170WA	C2_02170W_A		-0.0519668	0.561497
CAALFM_C202180WA	C2_02180W_A		-0.0286917	0.748179
CAALFM_C202190CA	C2_02190C_A		0.0704048	0.569762
CAALFM_C202200WA	C2_02200W_A		0.027812	0.760089
CAALFM_C202210CA	C2_02210C_A	TLG2	0.00999763	0.931957
CAALFM_C202220CA	C2_02220C_A		-0.509976	0.344926
CAALFM_C202230CA	C2_02230C_A		-0.0956894	0.830474
CAALFM_C202240CA	C2_02240C_A	HEX3	-0.0371615	0.733726
CAALFM_C202250CA	C2_02250C_A	OPI1	-0.281894	0.010268
CAALFM_C202260WA	C2_02260W_A		0.0195169	0.842123
CAALFM_C202270CA	C2_02270C_A		-0.348831	0.0497565
CAALFM_C202280WA	C2_02280W_A		-0.422129	0.00543901
CAALFM_C202290CA	C2_02290C_A		-0.0258297	0.885022
CAALFM_C202300WA	C2_02300W_A		-0.102966	0.557071
CAALFM_C202310WA	C2_02310W_A		-0.175609	0.250606
CAALFM_C202320CA	C2_02320C_A	CPR3	-0.0294922	0.733121
CAALFM_C202330WA	C2_02330W_A		0.455531	0.639722
CAALFM_C202340CA	C2_02340C_A	ENT3	0.0685995	0.419875
CAALFM_C202350CA	C2_02350C_A	SAC3	-0.0643473	0.461336
CAALFM_C202360CA	C2_02360C_A		0.0627519	0.692583
CAALFM_C202370CA	C2_02370C_A	HOM2	0.0810265	0.491408
CAALFM_C202380WA	C2_02380W_A	POB3	0.032065	0.707487
CAALFM_C202390WA	C2_02390W_A		0.485341	0.00130141
CAALFM_C202400WA	C2_02400W_A	ECM3	-0.0791749	0.425762
CAALFM_C202410WA	C2_02410W_A		0.188553	0.0550687
CAALFM_C202420CA	C2_02420C_A		-0.210156	0.0283153
CAALFM_C202430WA	C2_02430W_A	UTP21	-0.210124	0.121083
CAALFM_C202440WA	C2_02440W_A		0.0686806	0.49088
CAALFM_C202450CA	C2_02450C_A	UTP22	-0.239531	0.0446488
CAALFM_C202460WA	C2_02460W_A	ERG7	0.327136	0.00107207
CAALFM_C202470CA	C2_02470C_A	ATO7	-3.90074	0.152728
CAALFM_C202480WA	C2_02480W_A	ATO7	-2.10092	0.139196
CAALFM_C202490CA	C2_02490C_A		-0.216826	0.0130653
CAALFM_C202500WA	C2_02500W_A		0.0291068	0.7617
CAALFM_C202510WA	C2_02510W_A	PRS1	-0.29153	0.00210428
CAALFM_C202520WA	C2_02520W_A		0.0139476	0.889975
CAALFM_C202530WA	C2_02530W_A		-0.609796	0.490133
CAALFM_C202540WA	C2_02540W_A		-0.477569	6.27e-08
CAALFM_C202550CA	C2_02550C_A		-0.142487	0.546532
CAALFM_C202570WA	C2_02570W_A		-0.216323	0.159818
CAALFM_C202580WA	C2_02580W_A		-0.213796	0.140328
CAALFM_C202590WA	C2_02590W_A	ZRT2	-0.0338439	0.738039
CAALFM_C202600CA	C2_02600C_A	FGR22	-0.209534	0.620017
CAALFM_C202610CA	C2_02610C_A	HGT20	0.324441	0.175388
CAALFM_C202620WA	C2_02620W_A		0.235462	0.0626239
CAALFM_C202630WA	C2_02630W_A		0.0357516	0.783749
CAALFM_C202640CA	C2_02640C_A		0.429004	0.295676
CAALFM_C202660WA	C2_02660W_A		0.00695185	0.955716
CAALFM_C202670CA	C2_02670C_A		0.0410197	0.74447
CAALFM_C202680WA	C2_02680W_A	PDR17	-0.122248	0.214654
CAALFM_C202690WA	C2_02690W_A	SER2	0.162412	0.0841364
CAALFM_C202700CA	C2_02700C_A		0.275149	0.0247941
CAALFM_C202710CA	C2_02710C_A		-0.234535	0.0326375
CAALFM_C202720WA	C2_02720W_A		-0.0333553	0.727436
CAALFM_C202730WA	C2_02730W_A		-0.0419402	0.641342
CAALFM_C202740CA	C2_02740C_A	HPT1	-0.501625	5.76e-06
CAALFM_C202750CA	C2_02750C_A		0.726738	0.0352788
CAALFM_C202760WA	C2_02760W_A	LHS1	0.225932	0.00818148
CAALFM_C202770WA	C2_02770W_A		0.0116336	0.89188
CAALFM_C202780CA	C2_02780C_A	BUB2	-0.140837	0.280259
CAALFM_C202790CA	C2_02790C_A		-0.145716	0.699036
CAALFM_C202800WA	C2_02800W_A		-0.0292336	0.757176
CAALFM_C202810CA	C2_02810C_A	NCB2	-0.199147	0.0410613
CAALFM_C202820CA	C2_02820C_A		0.109142	0.405844
CAALFM_C202830CA	C2_02830C_A	SGT2	-0.0844248	0.33475
CAALFM_C202840CA	C2_02840C_A		0.0606175	0.53388
CAALFM_C202850WA	C2_02850W_A	UGA6	-0.560299	0.156908
CAALFM_C202860WA	C2_02860W_A	SUR2	0.147462	0.224047
CAALFM_C202870WA	C2_02870W_A		0.00577382	0.956333
CAALFM_C202880CA	C2_02880C_A	EBP7	-0.01295	0.914042
CAALFM_C202890WA	C2_02890W_A	SCT2	0.182013	0.0866129
CAALFM_C202900WA	C2_02900W_A		0.189028	0.159985
CAALFM_C202910WA	C2_02910W_A		-0.184952	0.681788
CAALFM_C202920WA	C2_02920W_A		-0.0170324	0.879509
CAALFM_C202930CA	C2_02930C_A		0.0125191	0.893122
CAALFM_C202940WA	C2_02940W_A	MET1	-0.223441	0.156578
CAALFM_C202950WA	C2_02950W_A		0.267154	0.0496775
CAALFM_C202960CA	C2_02960C_A		-0.14977	0.124328
CAALFM_C202970CA	C2_02970C_A	ALD5	0.343369	0.0609885
CAALFM_C202980CA	C2_02980C_A	DLD1	-0.281482	0.0023658
CAALFM_C202990CA	C2_02990C_A	HYU1	0.133463	0.183623
CAALFM_C203000CA	C2_03000C_A		-0.171474	0.0962312
CAALFM_C203010CA	C2_03010C_A	RNR21	-0.0457468	0.676343
CAALFM_C203020CA	C2_03020C_A		0.333792	0.0501733
CAALFM_C203030WA	C2_03030W_A	LIG4	0.0330782	0.797475
CAALFM_C203040WA	C2_03040W_A	PLC2	0.0419966	0.784534
CAALFM_C203050WA	C2_03050W_A	SHE9	0.0599862	0.634104
CAALFM_C203060WA	C2_03060W_A	PR26	-0.0522684	0.526955
CAALFM_C203070CA	C2_03070C_A	SMP3	0.053323	0.631164
CAALFM_C203080WA	C2_03080W_A	IDH2	-0.235663	0.0135539
CAALFM_C203090CA	C2_03090C_A	ADE8	0.16975	0.0949915
CAALFM_C203100WA	C2_03100W_A	EFT2	-0.10148	0.219043
CAALFM_C203110WA	C2_03110W_A		-1.49799	4.77e-10
CAALFM_C203120WA	C2_03120W_A	AMO1	0.0913393	0.671535
CAALFM_C203130WA	C2_03130W_A		-0.117038	0.309776
CAALFM_C203140CA	C2_03140C_A		0.0461581	0.60804
CAALFM_C203150CA	C2_03150C_A		-0.0497047	0.703726
CAALFM_C203160CA	C2_03160C_A	RNR1	-0.144844	0.428095
CAALFM_C203170WA	C2_03170W_A		-0.468628	5.95e-05
CAALFM_C203180CA	C2_03180C_A	TOM1	-0.109525	0.250383
CAALFM_C203200WA	C2_03200W_A	PRP3	0.418114	0.0115926
CAALFM_C203210WA	C2_03210W_A		0.23217	0.0902396
CAALFM_C203220CA	C2_03220C_A	STP4	-0.113263	0.208565
CAALFM_C203230CA	C2_03230C_A	FEN12	-0.0262468	0.796089
CAALFM_C203240CA	C2_03240C_A	ROM2	0.0120178	0.882138
CAALFM_C203250WA	C2_03250W_A	AVT7	0.201852	0.0320157
CAALFM_C203260WA	C2_03260W_A		0.13782	0.148161
CAALFM_C203270WA	C2_03270W_A	GPM1	0.165518	0.140534
CAALFM_C203280WA	C2_03280W_A	NSP1	-0.0066303	0.940651
CAALFM_C203290WA	C2_03290W_A		0.0246533	0.874898
CAALFM_C203300WA	C2_03300W_A	HEM2	-0.0245705	0.785999
CAALFM_C203310CA	C2_03310C_A	VPS20	-0.086313	0.416878
CAALFM_C203320WA	C2_03320W_A	CHK1	-0.846885	3.63e-12
CAALFM_C203330CA	C2_03330C_A	HOG1	0.0338779	0.718238
CAALFM_C203340WA	C2_03340W_A		0.0337267	0.745015
CAALFM_C203350WA	C2_03350W_A	PGA17	-0.854116	0.149609
CAALFM_C203360WA	C2_03360W_A		0.186013	0.106417
CAALFM_C203370WA	C2_03370W_A	THI20	-0.289303	0.135554
CAALFM_C203380WA	C2_03380W_A	PAN1	0.0409128	0.61232
CAALFM_C203390CA	C2_03390C_A	HSP78	-0.244719	0.179103
CAALFM_C203400CA	C2_03400C_A	DFG16	-0.0228222	0.814415
CAALFM_C203410WA	C2_03410W_A		-0.0584682	0.565396
CAALFM_C203420CA	C2_03420C_A		-0.107711	0.317399
CAALFM_C203430WA	C2_03430W_A	NBN1	0.152005	0.196079
CAALFM_C203440WA	C2_03440W_A	PGA33	0.106113	0.27731
CAALFM_C203450WA	C2_03450W_A		-0.212522	0.0869092
CAALFM_C203460CA	C2_03460C_A		-0.304113	0.00356467
CAALFM_C203470CA	C2_03470C_A	COX6	-0.153547	0.356891
CAALFM_C203490CA	C2_03490C_A		0.0141267	0.901222
CAALFM_C203500WA	C2_03500W_A		0.108833	0.388065
CAALFM_C203520CA	C2_03520C_A	ADAEC	-0.126628	0.188466
CAALFM_C203530WA	C2_03530W_A		0.11958	0.220082
CAALFM_C203540WA	C2_03540W_A	RAD32	-0.0684508	0.465031
CAALFM_C203550CA	C2_03550C_A		-0.0824101	0.379033
CAALFM_C203560CA	C2_03560C_A		-0.489508	0.00415655
CAALFM_C203570CA	C2_03570C_A		0.163122	0.321909
CAALFM_C203580WA	C2_03580W_A		0.121797	0.761589
CAALFM_C203590CA	C2_03590C_A	CAP4	-0.110866	0.41987
CAALFM_C203600WA	C2_03600W_A	BMT8	0.241283	0.0360075
CAALFM_C203610WA	C2_03610W_A	FMO2	0.24171	0.0681781
CAALFM_C203620WA	C2_03620W_A	IFK2	-0.154266	0.139767
CAALFM_C203630WA	C2_03630W_A		1.06486	0.217931
CAALFM_C203640WA	C2_03640W_A	UGA11	0.153868	0.27797
CAALFM_C203660WA	C2_03660W_A	UGA11	1.12933	0.516591
CAALFM_C203670WA	C2_03670W_A	SAP99	0.224683	0.558699
CAALFM_C203680WA	C2_03680W_A	SAP98	-0.0016173	0.991213
CAALFM_C203690CA	C2_03690C_A		-0.207455	0.345972
CAALFM_C203700WA	C2_03700W_A		0.1468	0.237199
CAALFM_C203710WA	C2_03710W_A		0.135965	0.913319
CAALFM_C203720WA	C2_03720W_A	PGA16	NA	NA
CAALFM_C203730WA	C2_03730W_A	PGA16	NA	NA
CAALFM_C203740WA	C2_03740W_A	PGA16	-0.103711	0.924421
CAALFM_C203750WA	C2_03750W_A	YIM1	-2.45753	2.53e-118
CAALFM_C203760CA	C2_03760C_A		0.143174	0.108277
CAALFM_C203770CA	C2_03770C_A	STE11	0.104726	0.234473
CAALFM_C203780CA	C2_03780C_A		-0.0147631	0.874223
CAALFM_C203790CA	C2_03790C_A	ASR3	0.21538	0.12157
CAALFM_C203800CA	C2_03800C_A		0.199403	0.0449952
CAALFM_C203810CA	C2_03810C_A	RPL21A	-0.174061	0.24273
CAALFM_C203820CA	C2_03820C_A	RPS9B	-0.294201	0.0228797
CAALFM_C203830WA	C2_03830W_A		-0.111631	0.387403
CAALFM_C203840CA	C2_03840C_A	INO4	0.00017528	0.998783
CAALFM_C203850WA	C2_03850W_A	INO4	1.13962	0.751716
CAALFM_C203860WA	C2_03860W_A	INO4	-0.266277	0.704693
CAALFM_C203870WA	C2_03870W_A	GNA1	-0.0455538	0.740269
CAALFM_C203880CA	C2_03880C_A		-0.0219297	0.872111
CAALFM_C203890WA	C2_03890W_A		0.0316108	0.797569
CAALFM_C203900CA	C2_03900C_A		0.139162	0.108321
CAALFM_C203910CA	C2_03910C_A		-0.132132	0.181399
CAALFM_C203920CA	C2_03920C_A	GPI13	-0.0493792	0.591296
CAALFM_C203930CA	C2_03930C_A		0.068831	0.508823
CAALFM_C203940CA	C2_03940C_A	SCH9	-0.0623602	0.577922
CAALFM_C203950WA	C2_03950W_A		-0.532926	0.0120284
CAALFM_C203960WA	C2_03960W_A	RPL39	-0.207238	0.176034
CAALFM_C203970WA	C2_03970W_A		0.279072	0.0176091
CAALFM_C203980CA	C2_03980C_A	MED1	-0.184813	0.115689
CAALFM_C203990WA	C2_03990W_A	GCD7	-0.137831	0.243561
CAALFM_C204000CA	C2_04000C_A		-0.691429	0.357699
CAALFM_C204010CA	C2_04010C_A	HSP21	-0.539797	0.675507
CAALFM_C204020CA	C2_04020C_A	SDS22	-0.294521	0.00128997
CAALFM_C204030CA	C2_04030C_A	ACP12	-0.380432	0.023177
CAALFM_C204040CA	C2_04040C_A	DCK2	0.129422	0.2142
CAALFM_C204050CA	C2_04050C_A	DCK1	-0.0517326	0.632273
CAALFM_C204060CA	C2_04060C_A	SSY1	0.046457	0.657871
CAALFM_C204070CA	C2_04070C_A	SSY1	0.253432	0.76746
CAALFM_C204080WA	C2_04080W_A		0.0203767	0.87675
CAALFM_C204090WA	C2_04090W_A		-0.257032	0.646675
CAALFM_C204100WA	C2_04100W_A		0.187964	0.150181
CAALFM_C204110WA	C2_04110W_A		0.714018	0.0175823
CAALFM_C204120CA	C2_04120C_A		-0.25096	0.106968
CAALFM_C204130WA	C2_04130W_A		0.0551761	0.557096
CAALFM_C204140WA	C2_04140W_A	CHS5	0.134038	0.13898
CAALFM_C204150CA	C2_04150C_A	VMA7	0.129294	0.225967
CAALFM_C204160WA	C2_04160W_A		-0.280798	0.0946693
CAALFM_C204170CA	C2_04170C_A		-0.346661	0.123553
CAALFM_C204180CA	C2_04180C_A		0.0930343	0.467626
CAALFM_C204190CA	C2_04190C_A	UGA1	0.299651	0.178452
CAALFM_C204200WA	C2_04200W_A	TBF1	-0.129576	0.190218
CAALFM_C204210WA	C2_04210W_A	STE4	0.116066	0.33764
CAALFM_C204220CA	C2_04220C_A	TAF14	0.0713345	0.438796
CAALFM_C204230WA	C2_04230W_A	BAT21	0.202219	0.0460125
CAALFM_C204240CA	C2_04240C_A	HYM1	0.0945132	0.361714
CAALFM_C204250WA	C2_04250W_A	VPS36	-0.0907775	0.365613
CAALFM_C204260WA	C2_04260W_A	SSN3	0.221335	0.0364068
CAALFM_C204270WA	C2_04270W_A	CAK1	0.236762	0.0212129
CAALFM_C204280WA	C2_04280W_A		0.196454	0.126935
CAALFM_C204290WA	C2_04290W_A	RIM11	NA	NA
CAALFM_C204300CA	C2_04300C_A		0.403888	0.00216739
CAALFM_C204310WA	C2_04310W_A	ERG10	0.703513	1.47e-06
CAALFM_C204320WA	C2_04320W_A		0.045132	0.713412
CAALFM_C204330CA	C2_04330C_A		-0.0451864	0.656668
CAALFM_C204340CA	C2_04340C_A		0.439323	0.00042258
CAALFM_C204350CA	C2_04350C_A	SUV3	-0.169265	0.0740877
CAALFM_C204360WA	C2_04360W_A		0.083485	0.393758
CAALFM_C204370WA	C2_04370W_A		-0.110785	0.304778
CAALFM_C204380CA	C2_04380C_A		0.0743287	0.429749
CAALFM_C204390WA	C2_04390W_A		0.0934554	0.691607
CAALFM_C204400WA	C2_04400W_A		-0.113954	0.208087
CAALFM_C204410WA	C2_04410W_A		0.0446128	0.69502
CAALFM_C204420WA	C2_04420W_A	IFA4	-0.0593157	0.775755
CAALFM_C204430WA	C2_04430W_A		-0.169463	0.802137
CAALFM_C204440WA	C2_04440W_A		0.463474	0.0505256
CAALFM_C204450WA	C2_04450W_A		0.208403	0.220324
CAALFM_C204460WA	C2_04460W_A	LYS22	0.0521303	0.570176
CAALFM_C204470WA	C2_04470W_A	ADH3	0.21973	0.300066
CAALFM_C204480WA	C2_04480W_A		0.841172	0.00065379
CAALFM_C204490WA	C2_04490W_A		0.18141	0.184975
CAALFM_C204500WA	C2_04500W_A		-0.0678647	0.423296
CAALFM_C204510WA	C2_04510W_A	RIM2	-0.240861	0.0119908
CAALFM_C204520CA	C2_04520C_A		-0.111883	0.446751
CAALFM_C204530WA	C2_04530W_A	MED8	0.0113398	0.933476
CAALFM_C204540CA	C2_04540C_A	GDT1	-0.294627	0.013424
CAALFM_C204550CA	C2_04550C_A	NDH51	-0.250989	0.209353
CAALFM_C204560WA	C2_04560W_A	KTR2	-0.187605	0.211781
CAALFM_C204570WA	C2_04570W_A		-0.298335	0.00613867
CAALFM_C204580WA	C2_04580W_A	ERG20	0.062207	0.460888
CAALFM_C204590CA	C2_04590C_A	QCR8	-0.305356	0.152269
CAALFM_C204600CA	C2_04600C_A	RPL17B	-0.186796	0.19942
CAALFM_C204610CA	C2_04610C_A	RPL17B	0.369955	0.480455
CAALFM_C204620WA	C2_04620W_A		0.231813	0.0294451
CAALFM_C204640CA	C2_04640C_A	SNU114	-0.0222828	0.832258
CAALFM_C204650CA	C2_04650C_A	RPB4	-0.0648537	0.564452
CAALFM_C204660CA	C2_04660C_A	YAK1	0.0452731	0.650696
CAALFM_C204670WA	C2_04670W_A		-0.115996	0.722324
CAALFM_C204680WA	C2_04680W_A	TIM17	-0.399077	0.00380303
CAALFM_C204690CA	C2_04690C_A	TPO5	-0.0800026	0.444186
CAALFM_C204700CA	C2_04700C_A		-0.182365	0.182013
CAALFM_C204710CA	C2_04710C_A	URE2	-0.114058	0.218186
CAALFM_C204720CA	C2_04720C_A	FGR51	0.156747	0.101665
CAALFM_C204730WA	C2_04730W_A		-0.027767	0.793798
CAALFM_C204740CA	C2_04740C_A		-0.0638859	0.75706
CAALFM_C204750WA	C2_04750W_A		0.11377	0.379705
CAALFM_C204760WA	C2_04760W_A	KIC1	0.173621	0.0459395
CAALFM_C204770WA	C2_04770W_A		-0.189053	0.0436887
CAALFM_C204780WA	C2_04780W_A		-0.131941	0.121708
CAALFM_C204790CA	C2_04790C_A		-0.334008	0.0369063
CAALFM_C204800CA	C2_04800C_A	MDM10	-0.12126	0.309505
CAALFM_C204810WA	C2_04810W_A	HIS3	-0.0863255	0.534539
CAALFM_C204820WA	C2_04820W_A		-0.322839	0.00459616
CAALFM_C204830WA	C2_04830W_A		-0.538622	2.76e-05
CAALFM_C204850CA	C2_04850C_A		-0.0673819	0.537132
CAALFM_C204860WA	C2_04860W_A	PZF1	-0.0120852	0.939104
CAALFM_C204870CA	C2_04870C_A		-0.0501243	0.546271
CAALFM_C204880CA	C2_04880C_A	ARH2	-0.0948339	0.467005
CAALFM_C204890CA	C2_04890C_A	ARH2	0.0975302	0.757494
CAALFM_C204920WA	C2_04920W_A	ARH2	-0.119711	0.880934
CAALFM_C204930CA	C2_04930C_A	CRK1	-0.0789655	0.44011
CAALFM_C204940CA	C2_04940C_A	ITR1	0.10887	0.234317
CAALFM_C204950CA	C2_04950C_A	CYT1	-0.387931	0.0781102
CAALFM_C204960CA	C2_04960C_A		-0.0783508	0.487032
CAALFM_C204970WA	C2_04970W_A	ABP2	0.738795	5.78e-11
CAALFM_C204980CA	C2_04980C_A	CKA2	0.0283248	0.77651
CAALFM_C204990WA	C2_04990W_A		-0.0420207	0.779982
CAALFM_C205000CA	C2_05000C_A	MRPL10	-0.425289	0.0286029
CAALFM_C205010WA	C2_05010W_A	MRPL10	-1.20204	0.600926
CAALFM_C205020WA	C2_05020W_A		0.0908685	0.405143
CAALFM_C205030CA	C2_05030C_A	RHO3	0.231408	0.00844373
CAALFM_C205040CA	C2_05040C_A		-0.104437	0.363344
CAALFM_C205050CA	C2_05050C_A		0.0181529	0.857247
CAALFM_C205060CA	C2_05060C_A		-0.36043	0.0772277
CAALFM_C205070WA	C2_05070W_A	FRE9	0.0142633	0.951597
CAALFM_C205080CA	C2_05080C_A		-0.209561	0.1457
CAALFM_C205090WA	C2_05090W_A	MAK5	-0.284159	0.0103827
CAALFM_C205100CA	C2_05100C_A	ERF1	-0.153398	0.12159
CAALFM_C205110WA	C2_05110W_A	LEM3	-0.0861126	0.392696
CAALFM_C205130WA	C2_05130W_A		0.210596	0.17344
CAALFM_C205140WA	C2_05140W_A	CDC15	0.186615	0.0700876
CAALFM_C205150WA	C2_05150W_A	PEX2	0.0461722	0.675047
CAALFM_C205160CA	C2_05160C_A		-0.283814	0.017355
CAALFM_C205170WA	C2_05170W_A		0.0644181	0.527085
CAALFM_C205180WA	C2_05180W_A	WH11	0.250446	0.702016
CAALFM_C205190WA	C2_05190W_A	CDC21	0.0538856	0.581232
CAALFM_C205200CA	C2_05200C_A	SGO1	0.0977228	0.306498
CAALFM_C205210WA	C2_05210W_A	DAD2	0.0287503	0.832396
CAALFM_C205220CA	C2_05220C_A		-0.0109526	0.902118
CAALFM_C205230CA	C2_05230C_A	RPF2	-0.20719	0.0582378
CAALFM_C205240CA	C2_05240C_A	RPF2	-0.729238	0.600261
CAALFM_C205250CA	C2_05250C_A	AAT1	0.230295	0.00635917
CAALFM_C205260WA	C2_05260W_A	BUD14	0.195199	0.0496902
CAALFM_C205270WA	C2_05270W_A		-0.224355	0.018096
CAALFM_C205280CA	C2_05280C_A	GPI19	-0.0264776	0.863312
CAALFM_C205290CA	C2_05290C_A		0.188454	0.111928
CAALFM_C205300CA	C2_05300C_A		-0.504173	0.0093542
CAALFM_C205310CA	C2_05310C_A		NA	NA
CAALFM_C205320WA	C2_05320W_A	CDC7	0.0480376	0.608502
CAALFM_C205330CA	C2_05330C_A		-0.0656409	0.561609
CAALFM_C205340CA	C2_05340C_A	RPC40	-0.270918	0.00343787
CAALFM_C205350CA	C2_05350C_A		0.0306281	0.849139
CAALFM_C205360CA	C2_05360C_A	BIO32	0.850117	2.34e-06
CAALFM_C205370CA	C2_05370C_A	RXT3	-0.206449	0.0348651
CAALFM_C205380WA	C2_05380W_A		-0.185871	0.0681067
CAALFM_C205390CA	C2_05390C_A		-0.119258	0.54094
CAALFM_C205400WA	C2_05400W_A		-0.114144	0.506597
CAALFM_C205410WA	C2_05410W_A		-0.220626	0.177714
CAALFM_C205420CA	C2_05420C_A		-0.0525598	0.892283
CAALFM_C205430CA	C2_05430C_A		1.11625	0.594293
CAALFM_C205440WA	C2_05440W_A	PEX6	0.175684	0.081719
CAALFM_C205450CA	C2_05450C_A	MDJ2	-0.54417	0.0270749
CAALFM_C205460WA	C2_05460W_A	CDC19	-0.0269871	0.760939
CAALFM_C205470WA	C2_05470W_A	COQ5	-0.259773	0.0125876
CAALFM_C205480CA	C2_05480C_A		-0.0300977	0.873521
CAALFM_C205490WA	C2_05490W_A		0.0439469	0.841727
CAALFM_C205500WA	C2_05500W_A	ATP4	-0.23844	0.11997
CAALFM_C205510CA	C2_05510C_A		-0.102904	0.373402
CAALFM_C205520WA	C2_05520W_A		-0.0867553	0.430763
CAALFM_C205530CA	C2_05530C_A		-0.0190335	0.830307
CAALFM_C205540CA	C2_05540C_A		0.131094	0.222677
CAALFM_C205550WA	C2_05550W_A		0.260088	0.00435936
CAALFM_C205560WA	C2_05560W_A		0.225622	0.0279718
CAALFM_C205570CA	C2_05570C_A		-0.858451	1.23e-06
CAALFM_C205580WA	C2_05580W_A		-0.0291561	0.743461
CAALFM_C205590CA	C2_05590C_A		0.093144	0.447339
CAALFM_C205600WA	C2_05600W_A		0.15019	0.708994
CAALFM_C205610CA	C2_05610C_A	RPS8A	-0.219248	0.143144
CAALFM_C205620WA	C2_05620W_A	KTI11	-0.329829	0.190874
CAALFM_C205630CA	C2_05630C_A	KTI11	-2.20523	0.198765
CAALFM_C205640WA	C2_05640W_A		-0.124324	0.290652
CAALFM_C205650WA	C2_05650W_A	VPS35	-0.0468089	0.591501
CAALFM_C205660WA	C2_05660W_A	PNG2	-0.0285822	0.90032
CAALFM_C205670CA	C2_05670C_A		0.022973	0.838492
CAALFM_C205680WA	C2_05680W_A	COG4	0.0663887	0.521264
CAALFM_C205690CA	C2_05690C_A	YTH1	-0.131407	0.281465
CAALFM_C205700WA	C2_05700W_A	OSM1	0.180267	0.130563
CAALFM_C205710CA	C2_05710C_A		-0.18808	0.246358
CAALFM_C205720CA	C2_05720C_A		0.085713	0.315262
CAALFM_C205730CA	C2_05730C_A	GWT1	-0.1798	0.14361
CAALFM_C205740WA	C2_05740W_A	SPO7	0.0638587	0.501797
CAALFM_C205750WA	C2_05750W_A		-0.169715	0.42477
CAALFM_C205760CA	C2_05760C_A		-0.162933	0.28596
CAALFM_C205770WA	C2_05770W_A		0.102079	0.528286
CAALFM_C205780CA	C2_05780C_A	MKK2	0.225629	0.00914459
CAALFM_C205790CA	C2_05790C_A	RFC1	0.129517	0.132606
CAALFM_C205800CA	C2_05800C_A		0.170678	0.0685869
CAALFM_C205810WA	C2_05810W_A		-0.091341	0.55914
CAALFM_C205820WA	C2_05820W_A		0.327467	0.0531767
CAALFM_C205830CA	C2_05830C_A		-0.049912	0.736059
CAALFM_C205840WA	C2_05840W_A		-0.134482	0.424027
CAALFM_C205850CA	C2_05850C_A		-0.0118761	0.901034
CAALFM_C205860CA	C2_05860C_A		0.21017	0.278576
CAALFM_C205870WA	C2_05870W_A		0.0331179	0.876687
CAALFM_C205880WA	C2_05880W_A		NA	NA
CAALFM_C205890CA	C2_05890C_A	IDP1	0.132303	0.147755
CAALFM_C205900WA	C2_05900W_A		0.247149	0.839867
CAALFM_C205910WA	C2_05910W_A		-0.238364	0.00646685
CAALFM_C205920CA	C2_05920C_A	COX8	-0.17764	0.330581
CAALFM_C205930WA	C2_05930W_A	COX9	-0.163488	0.356639
CAALFM_C205940CA	C2_05940C_A	VPS33	0.0318695	0.776976
CAALFM_C205950CA	C2_05950C_A	TES15	0.172202	0.2858
CAALFM_C205960CA	C2_05960C_A		-0.182706	0.280963
CAALFM_C205970CA	C2_05970C_A	TES1	-0.466156	0.00020831
CAALFM_C205980CA	C2_05980C_A		0.0765556	0.600575
CAALFM_C205990CA	C2_05990C_A		0.52051	0.0291259
CAALFM_C206000WA	C2_06000W_A	LAS1	-0.277318	0.0178227
CAALFM_C206010WA	C2_06010W_A	SPO72	-0.0280098	0.78538
CAALFM_C206020WA	C2_06020W_A	CNT	0.0750742	0.555373
CAALFM_C206030WA	C2_06030W_A		0.0414593	0.696511
CAALFM_C206040CA	C2_06040C_A		0.129342	0.380002
CAALFM_C206050CA	C2_06050C_A		-1.31958	0.307087
CAALFM_C206070WA	C2_06070W_A	FAA2-1	0.237754	0.0586987
CAALFM_C206080CA	C2_06080C_A		-0.0045577	0.963399
CAALFM_C206090WA	C2_06090W_A		-0.0358907	0.735194
CAALFM_C206100WA	C2_06100W_A	PMT4	0.141441	0.184938
CAALFM_C206110WA	C2_06110W_A		0.146749	0.125129
CAALFM_C206120CA	C2_06120C_A		-0.352975	0.037602
CAALFM_C206130WA	C2_06130W_A	CSM3	-0.187905	0.0847214
CAALFM_C206140CA	C2_06140C_A		0.322022	0.483292
CAALFM_C206150CA	C2_06150C_A	RPN10	-0.118794	0.166004
CAALFM_C206160WA	C2_06160W_A		-0.115824	0.433242
CAALFM_C206170CA	C2_06170C_A	ECM17	0.25711	0.0802551
CAALFM_C206180CA	C2_06180C_A	FGR12	1.70514	0.534934
CAALFM_C206190WA	C2_06190W_A	ILV1	0.00686395	0.954873
[truncated: 4,264 more rows]

## Sheet: C. auris 15 min
Gene ID	log2FC	pvalue	product
B9J08_000126	NA	NA	tRNA-Asp
B9J08_000191	NA	NA	tRNA-Glu
B9J08_000212	NA	NA	tRNA-Thr
B9J08_000219	NA	NA	tRNA-Asp
B9J08_000329	NA	NA	hypothetical protein
B9J08_000416	NA	NA	tRNA-Leu
B9J08_000585	NA	NA	tRNA-Thr
B9J08_000745	NA	NA	tRNA-Thr
B9J08_000991	NA	NA	tRNA-His
B9J08_001055	NA	NA	5S ribosomal RNA
B9J08_001056	NA	NA	5S ribosomal RNA
B9J08_001057	NA	NA	5S ribosomal RNA
B9J08_001058	NA	NA	5S ribosomal RNA
B9J08_001059	NA	NA	5S ribosomal RNA
B9J08_001060	NA	NA	5S ribosomal RNA
B9J08_001327	NA	NA	tRNA-Phe
B9J08_001333	NA	NA	tRNA-Ala
B9J08_001334	NA	NA	tRNA-Val
B9J08_001453	NA	NA	Poly(A) polymerase PAPa
B9J08_001454	NA	NA	hypothetical protein
B9J08_001455	NA	NA	hypothetical protein
B9J08_001504	NA	NA	tRNA-Arg
B9J08_001517	NA	NA	hypothetical protein
B9J08_001518	NA	NA	hypothetical protein
B9J08_001520	NA	NA	hypothetical protein
B9J08_001521	NA	NA	hypothetical protein
B9J08_001522	NA	NA	hypothetical protein
B9J08_001523	NA	NA	hypothetical protein
B9J08_001524	NA	NA	hypothetical protein
B9J08_001525	NA	NA	hypothetical protein
B9J08_001526	NA	NA	hypothetical protein
B9J08_001527	NA	NA	hypothetical protein
B9J08_001528	NA	NA	hypothetical protein
B9J08_001529	NA	NA	hypothetical protein
B9J08_001530	NA	NA	hypothetical protein
B9J08_001661	NA	NA	tRNA-Asp
B9J08_001947	NA	NA	5S ribosomal RNA
B9J08_001948	NA	NA	hypothetical protein
B9J08_001949	NA	NA	hypothetical protein
B9J08_002237	NA	NA	hypothetical protein
B9J08_002239	NA	NA	hypothetical protein
B9J08_002240	NA	NA	hypothetical protein
B9J08_002242	NA	NA	hypothetical protein
B9J08_002244	NA	NA	hypothetical protein
B9J08_002582	NA	NA	hypothetical protein
B9J08_002583	NA	NA	hypothetical protein
B9J08_003043	NA	NA	tRNA-Leu
B9J08_003493	NA	NA	tRNA-Asn
B9J08_004099	NA	NA	hypothetical protein
B9J08_004101	NA	NA	hypothetical protein
B9J08_004102	NA	NA	hypothetical protein
B9J08_004103	NA	NA	hypothetical protein
B9J08_004104	NA	NA	hypothetical protein
B9J08_004105	NA	NA	hypothetical protein
B9J08_004106	NA	NA	hypothetical protein
B9J08_004107	NA	NA	hypothetical protein
B9J08_004108	NA	NA	hypothetical protein
B9J08_004127	NA	NA	tRNA-Ile
B9J08_004128	NA	NA	tRNA-Ala
B9J08_004281	NA	NA	tRNA-Arg
B9J08_004342	NA	NA	tRNA-Gln
B9J08_004471	NA	NA	hypothetical protein
B9J08_004472	NA	NA	allantoate permease
B9J08_004884	NA	NA	guanine deaminase
B9J08_004885	NA	NA	hypothetical protein
B9J08_004887	NA	NA	hypothetical protein
B9J08_004888	NA	NA	hypothetical protein
B9J08_004890	NA	NA	hypothetical protein
B9J08_004896	NA	NA	hypothetical protein
B9J08_004897	NA	NA	hypothetical protein
B9J08_004901	NA	NA	tRNA-Gln
B9J08_004996	NA	NA	tRNA-Ile
B9J08_005290	NA	NA	tRNA-Val
B9J08_005374	NA	NA	tRNA-Ala
B9J08_005533	NA	NA	tRNA-Ile
B9J08_005537	NA	NA	hypothetical protein
B9J08_005543	NA	NA	hypothetical protein
B9J08_005553	NA	NA	hypothetical protein
B9J08_005554	NA	NA	hypothetical protein
B9J08_005555	NA	NA	hypothetical protein
B9J08_005556	NA	NA	hypothetical protein
B9J08_005557	NA	NA	hypothetical protein
B9J08_005558	NA	NA	hypothetical protein
B9J08_005559	NA	NA	hypothetical protein
B9J08_005561	NA	NA	hypothetical protein
B9J08_005564	NA	NA	hypothetical protein
B9J08_005565	NA	NA	hypothetical protein
B9J08_005566	NA	NA	5S ribosomal RNA
B9J08_005583	NA	NA	hypothetical protein
B9J08_005585	NA	NA	hypothetical protein
B9J08_005587	NA	NA	hypothetical protein
B9J08_005589	NA	NA	mating type MTLa1
B9J08_005590	NA	NA	mating type MTLa2
B9J08_005075	4.60784	1.99e-85	respiratory growth induced protein 1
B9J08_002660	4.51339	0.00146922	hypothetical protein
B9J08_002658	3.83789	0.176986	tRNA-Ser
B9J08_002700	3.79583	0.172815	tRNA-His
B9J08_000676	3.44364	1.35e-29	hypothetical protein
B9J08_001364	3.43939	1.2e-31	hypothetical protein
B9J08_002243	3.42587	0.256925	hypothetical protein
B9J08_005571	3.29939	0.297695	hypothetical protein
B9J08_001714	3.21852	2e-12	hypothetical protein
B9J08_004470	3.08956	0.355716	5S ribosomal RNA
B9J08_005568	2.96101	1.29e-40	hypothetical protein
B9J08_002480	2.95684	9.91e-08	hypothetical protein
B9J08_005495	2.92808	0.396047	tRNA-Met
B9J08_002864	2.92129	9.44e-11	hypothetical protein
B9J08_005108	2.87424	8.88e-45	hypothetical protein
B9J08_002032	2.84011	2.78e-18	hypothetical protein
B9J08_002977	2.80633	8.79e-11	hypothetical protein
B9J08_000285	2.8004	2.2e-47	hypothetical protein
B9J08_000483	2.79324	7.09e-46	heat shock protein SSA1
B9J08_004560	2.71579	7.31e-09	OPT family small oligopeptide transporter
B9J08_002840	2.69794	9.55e-06	hypothetical protein
B9J08_000218	2.66539	0.5793	tRNA-Gly
B9J08_002586	2.66539	0.5793	tRNA-Pro
B9J08_003160	2.66539	0.5793	tRNA-Leu
B9J08_004313	2.66539	0.5793	tRNA-Asp
B9J08_005342	2.66539	0.5793	tRNA-Gly
B9J08_002250	2.6402	2.64e-06	hypothetical protein
B9J08_004261	2.58899	1.72e-18	hypothetical protein
B9J08_001532	2.49652	7.2e-05	hypothetical protein
B9J08_002565	2.49586	6.14e-15	hypothetical protein
B9J08_002031	2.47864	3.51e-10	hypothetical protein
B9J08_000592	2.46618	1.17e-06	hypothetical protein
B9J08_005582	2.45678	0.320056	hypothetical protein
B9J08_005394	2.42701	1.34e-09	hypothetical protein
B9J08_003072	2.42548	0.53721	tRNA-Gly
B9J08_001171	2.37895	0.0365431	hypothetical protein
B9J08_003627	2.37116	6.04e-08	hypothetical protein
B9J08_004544	2.36318	2.39e-05	OPT family small oligopeptide transporter
B9J08_005257	2.35679	3.2e-08	hypothetical protein
B9J08_004243	2.33062	2.13e-24	hypothetical protein
B9J08_004987	2.32347	3.86e-11	hypothetical protein
B9J08_003279	2.31346	4.63e-16	hypothetical protein
B9J08_002627	2.29888	4.47e-10	D-xylulose reductase
B9J08_001571	2.26182	4.88e-10	hypothetical protein
B9J08_005226	2.25287	1.25e-07	hypothetical protein
B9J08_004376	2.23601	7.6e-21	hypothetical protein
B9J08_002868	2.22087	3.01e-13	hypothetical protein
B9J08_003404	2.21462	7.01e-24	hypothetical protein
B9J08_004188	2.21268	4.72e-18	hypothetical protein
B9J08_002869	2.18556	8.62e-14	hypothetical protein
B9J08_002624	2.18054	5.92e-23	hypothetical protein
B9J08_005577	2.16358	0.137464	5S ribosomal RNA
B9J08_005180	2.15347	0.661248	tRNA-Asn
B9J08_005541	2.15347	0.661248	hypothetical protein
B9J08_001534	2.1208	7.83e-05	hypothetical protein
B9J08_003569	2.07672	0.000119468	hypothetical protein
B9J08_004748	2.02856	4.44e-10	hypothetical protein
B9J08_002976	2.02511	0.000170448	hypothetical protein
B9J08_002566	2.0111	7.15e-07	hexokinase
B9J08_000581	2.00949	8.87e-12	hypothetical protein
B9J08_005466	1.99945	0.427503	tRNA-Met
B9J08_003267	1.98796	4.02e-10	hypothetical protein
B9J08_004027	1.9829	1.04e-15	hypothetical protein
B9J08_003454	1.98001	3.29e-13	hypothetical protein
B9J08_000835	1.97444	5.73e-17	hypothetical protein
B9J08_003682	1.96762	6.42e-06	YjeF family domain-containing protein
B9J08_002984	1.96202	4.71e-10	hypothetical protein
B9J08_002251	1.93539	0.0119804	hypothetical protein
B9J08_002691	1.91603	5.22e-28	hypothetical protein
B9J08_001015	1.89152	1.15e-05	hypothetical protein
B9J08_000079	1.87714	0.292497	hypothetical protein
B9J08_000672	1.86138	0.0664133	hypothetical protein
B9J08_005345	1.86049	0.0153791	hypothetical protein
B9J08_004939	1.84039	2.7e-07	hypothetical protein
B9J08_000874	1.83702	1.01e-05	hypothetical protein
B9J08_000791	1.83627	5.1e-06	hypothetical protein
B9J08_002118	1.83231	2.88e-13	hypothetical protein
B9J08_003520	1.82869	0.480996	tRNA-Tyr
B9J08_005111	1.82869	0.480996	tRNA-Cys
B9J08_002640	1.82483	0.072777	hypothetical protein
B9J08_003491	1.81007	5.01e-12	hypothetical protein
B9J08_001862	1.80744	0.00319386	hypothetical protein
B9J08_004172	1.80658	5.45e-05	hypothetical protein
B9J08_003929	1.8054	2.66e-10	hypothetical protein
B9J08_002481	1.79667	2.15e-15	hypothetical protein
B9J08_001787	1.79604	1.21e-13	hypothetical protein
B9J08_002900	1.79483	0.000869255	hypothetical protein
B9J08_005567	1.78937	1.51e-11	hypothetical protein
B9J08_004512	1.78178	3.25e-11	hypothetical protein
B9J08_003466	1.7796	1.28e-05	malate dehydrogenase, NAD-dependent
B9J08_000261	1.77955	3.96e-06	hypothetical protein
B9J08_004513	1.77328	2.13e-07	hypothetical protein
B9J08_003002	1.76243	6.33e-06	hypothetical protein
B9J08_004136	1.76168	7.82e-06	hypothetical protein
B9J08_002830	1.76119	8.33e-06	hypothetical protein
B9J08_004511	1.75446	2.7e-19	hypothetical protein
B9J08_002122	1.74404	1.61e-15	hypothetical protein
B9J08_002628	1.74345	2.85e-20	hypothetical protein
B9J08_003343	1.73743	6.43e-16	hypothetical protein
B9J08_000267	1.7305	7.85e-11	hypothetical protein
B9J08_004658	1.72645	6.99e-07	hypothetical protein
B9J08_004204	1.7247	9e-08	hypothetical protein
B9J08_002173	1.72422	2.55e-05	potassium/sodium efflux P-type ATPase, fungal-type
B9J08_003568	1.70193	0.000242318	hypothetical protein
B9J08_002423	1.70116	6.85e-11	hypothetical protein
B9J08_000940	1.68071	1.41e-07	hypothetical protein
B9J08_000814	1.66969	7.75e-13	hypothetical protein
B9J08_002382	1.66107	2.9e-08	hypothetical protein
B9J08_002418	1.65702	0.54215	tRNA-Met
B9J08_002901	1.65505	1.22e-13	hypothetical protein
B9J08_001695	1.64771	2.96e-10	alpha,alpha-trehalose-phosphate synthase [UDP-forming]
B9J08_001558	1.63807	6.66e-09	hypothetical protein
B9J08_001153	1.63538	3.85e-05	hypothetical protein
B9J08_003532	1.6326	0.0365073	hypothetical protein
B9J08_003068	1.62278	3.2e-09	hypothetical protein
B9J08_000455	1.61516	0.745026	tRNA-Glu
B9J08_001531	1.61516	0.745026	hypothetical protein
B9J08_001950	1.61516	0.745026	hypothetical protein
B9J08_002331	1.61516	0.745026	tRNA-Arg
B9J08_004203	1.61516	0.745026	tRNA-Asp
B9J08_004680	1.61516	0.745026	hypothetical protein
B9J08_004894	1.61516	0.745026	hypothetical protein
B9J08_004995	1.61516	0.745026	tRNA-Glu
B9J08_004997	1.61516	0.745026	tRNA-Ala
B9J08_002865	1.61444	7.22e-16	hypothetical protein
B9J08_004124	1.61419	6.47e-10	glutamate 5-kinase
B9J08_002245	1.60498	0.303821	hypothetical protein
B9J08_001440	1.60356	1.67e-09	hypothetical protein
B9J08_004331	1.59599	0.00428579	alcohol dehydrogenase 1
B9J08_000336	1.58927	0.000108281	hypothetical protein
B9J08_002039	1.5869	3.27e-07	hypothetical protein
B9J08_000997	1.58144	1.69e-05	hypothetical protein
B9J08_002831	1.57823	0.000258507	hypothetical protein
B9J08_004837	1.57552	4.51e-08	pyridoxamine 5'-phosphate oxidase
B9J08_004450	1.57093	3.74e-05	pyrimidine biosynthesis enzyme THI5
B9J08_001025	1.56887	1.58e-05	hypothetical protein
B9J08_003179	1.56885	1.76e-07	hypothetical protein
B9J08_000779	1.56801	1.13e-11	hypothetical protein
B9J08_003737	1.56718	6.09e-14	hypothetical protein
B9J08_002228	1.56404	3.7e-08	hypothetical protein
B9J08_002902	1.56126	5.2e-13	hypothetical protein
B9J08_005081	1.55384	7e-05	hypothetical protein
B9J08_004244	1.54933	0.45803	tRNA-Ser
B9J08_004724	1.53755	0.0894377	tRNA-Met
B9J08_004975	1.53579	2.14e-10	hypothetical protein
B9J08_001881	1.53469	2.36e-07	hypothetical protein
B9J08_000418	1.53427	3.75e-06	hypothetical protein
B9J08_005025	1.52924	0.000222085	hypothetical protein
B9J08_001313	1.50219	0.00145746	hypothetical protein
B9J08_003702	1.4977	0.197764	hypothetical protein
B9J08_000806	1.49731	1.64e-06	hypothetical protein
B9J08_004026	1.49562	6.59e-06	hypothetical protein
B9J08_000476	1.48795	2.23e-21	hypothetical protein
B9J08_000944	1.4876	7.71e-05	YjeF family domain-containing protein
B9J08_004750	1.47989	2.83e-10	hypothetical protein
B9J08_002079	1.47861	1.32e-09	hypothetical protein
B9J08_004113	1.47593	8.39e-05	hypothetical protein
B9J08_003584	1.47493	5.59e-13	hypothetical protein
B9J08_003371	1.47046	1.15e-06	hypothetical protein
B9J08_004167	1.46771	3.07e-08	hypothetical protein
B9J08_002029	1.46274	1.25e-08	hypothetical protein
B9J08_001741	1.46022	3.4e-08	hypothetical protein
B9J08_005160	1.45945	7.59e-09	hypothetical protein
B9J08_003772	1.4581	2.22e-09	hypothetical protein
B9J08_002659	1.44971	0.00176526	hypothetical protein
B9J08_002477	1.44789	0.000242374	hypothetical protein
B9J08_001350	1.44497	1.17e-06	hypothetical protein
B9J08_005258	1.44198	1.02e-05	hypothetical protein
B9J08_004205	1.43651	2.73e-09	hypothetical protein
B9J08_005581	1.43608	7.84e-05	glycogen debranching enzyme
B9J08_000032	1.43452	3.31e-05	hypothetical protein
B9J08_000059	1.43417	2.86e-05	hypothetical protein
B9J08_003452	1.43276	0.00603931	4-aminobutyrate aminotransferase
B9J08_001863	1.43021	3.02e-06	hypothetical protein
B9J08_000684	1.42896	5.69e-08	hypothetical protein
B9J08_002564	1.42863	2.16e-10	hypothetical protein
B9J08_001932	1.42849	0.0115849	hypothetical protein
B9J08_002692	1.42812	9.23e-08	hypothetical protein
B9J08_003003	1.42555	5.27e-05	hypothetical protein
B9J08_001740	1.42006	0.00254216	hypothetical protein
B9J08_001281	1.41967	4.1e-07	ubiquinone biosynthesis monooxygenase COQ6
B9J08_003271	1.4187	7.67e-07	L-aminoadipate-semialdehyde dehydrogenase
B9J08_003441	1.41589	0.000253207	hypothetical protein
B9J08_003766	1.41421	2.16e-10	hypothetical protein
B9J08_002062	1.40924	1.78e-07	hypothetical protein
B9J08_002205	1.40905	5.03e-06	hypothetical protein
B9J08_002231	1.40493	0.000290861	pyruvate decarboxylase
B9J08_004525	1.40218	0.000310768	hypothetical protein
B9J08_001873	1.39862	2.77e-11	hypothetical protein
B9J08_002626	1.39805	3.93e-07	hypothetical protein
B9J08_003628	1.39776	2.76e-11	hypothetical protein
B9J08_002451	1.39631	6.16e-05	hypothetical protein
B9J08_003475	1.391	0.00124122	hypothetical protein
B9J08_002063	1.38987	1.18e-07	hypothetical protein
B9J08_000777	1.38763	1.68e-07	hypothetical protein
B9J08_002024	1.3842	5.98e-08	hypothetical protein
B9J08_003378	1.38155	3.07e-09	hypothetical protein
B9J08_003389	1.3803	9.66e-07	hypothetical protein
B9J08_002986	1.3664	0.000158706	1,4-alpha-glucan-branching enzyme
B9J08_002012	1.3612	3.68e-11	hypothetical protein
B9J08_002297	1.36039	1.24e-09	hypothetical protein
B9J08_002441	1.35381	0.000200875	hypothetical protein
B9J08_002703	1.35277	0.000354365	hypothetical protein
B9J08_001990	1.34846	0.167945	tRNA-Leu
B9J08_004928	1.34495	1.77e-05	6-phosphofructokinase
B9J08_000844	1.34418	0.0018535	hypothetical protein
B9J08_004037	1.34188	3.01e-07	hypothetical protein
B9J08_000939	1.33626	5.84e-10	hypothetical protein
B9J08_001448	1.33176	7.81e-05	lanosterol 14-alpha demethylase
B9J08_001951	1.33146	3.53e-05	hypothetical protein
B9J08_000304	1.32909	0.789701	tRNA-Arg
B9J08_000305	1.32909	0.789701	tRNA-Phe
B9J08_000723	1.32909	0.789701	tRNA-Glu
B9J08_002880	1.32909	0.789701	tRNA-Gly
B9J08_003061	1.32909	0.789701	tRNA-Thr
B9J08_003199	1.32909	0.789701	tRNA-Asn
B9J08_004097	1.32909	0.789701	hypothetical protein
B9J08_004100	1.32909	0.789701	hypothetical protein
B9J08_004891	1.32909	0.789701	hypothetical protein
B9J08_004892	1.32909	0.789701	hypothetical protein
B9J08_005584	1.32909	0.789701	hypothetical protein
B9J08_004469	1.32302	0.000935703	hypothetical protein
B9J08_004367	1.32112	0.00374875	hypothetical protein
B9J08_002669	1.31941	3.24e-06	phosphoenolpyruvate carboxykinase [ATP]
B9J08_004533	1.3154	3.08e-07	hypothetical protein
B9J08_001775	1.31364	5.09e-10	hypothetical protein
B9J08_005277	1.3111	0.0541205	hypothetical protein
B9J08_002057	1.30786	1.17e-15	hypothetical protein
B9J08_001386	1.30755	8.97e-12	hypothetical protein
B9J08_000690	1.30136	2.19e-07	hypothetical protein
B9J08_000836	1.29975	3.7e-05	hypothetical protein
B9J08_002563	1.29655	7.32e-11	hypothetical protein
B9J08_001682	1.2937	1.1e-05	hypothetical protein
B9J08_001365	1.28546	5.51e-08	hypothetical protein
B9J08_004449	1.28387	0.000381738	hypothetical protein
B9J08_005090	1.28163	0.0305294	hypothetical protein
B9J08_000775	1.28115	1.74e-06	trehalose-phosphatase
B9J08_004152	1.28087	0.00293958	hypothetical protein
B9J08_001277	1.28043	9.06e-06	2-isopropylmalate synthase
B9J08_004536	1.26944	3.12e-06	hypothetical protein
B9J08_000842	1.26924	7.63e-09	hypothetical protein
B9J08_004797	1.26285	2.16e-16	hypothetical protein
B9J08_005080	1.25722	0.0107499	hypothetical protein
B9J08_001998	1.25717	2.98e-06	OPT family small oligopeptide transporter
B9J08_004798	1.25697	0.0121895	ornithine carbamoyltransferase
B9J08_005200	1.25632	0.00122983	hypothetical protein
B9J08_003108	1.25631	0.709164	tRNA-Glu
B9J08_001581	1.25481	0.000375326	hypothetical protein
B9J08_000467	1.24907	5.55e-09	hypothetical protein
B9J08_001696	1.24523	9.83e-10	hypothetical protein
B9J08_004378	1.2341	0.00436856	hypothetical protein
B9J08_002427	1.23079	0.00658179	hypothetical protein
B9J08_000321	1.22635	3.02e-05	hypothetical protein
B9J08_004522	1.22595	0.000100484	hypothetical protein
B9J08_004218	1.22571	0.724837	tRNA-Ala
B9J08_001544	1.22431	5.35e-09	hypothetical protein
B9J08_003500	1.22202	0.00580785	hypothetical protein
B9J08_001874	1.21712	1.59e-08	hypothetical protein
B9J08_000011	1.21409	1.47e-10	hypothetical protein
B9J08_003591	1.20762	0.116202	hypothetical protein
B9J08_002381	1.20335	1.35e-05	hypothetical protein
B9J08_002254	1.19737	0.000730918	hypothetical protein
B9J08_002877	1.19559	4.16e-06	hypothetical protein
B9J08_001642	1.1927	1.46e-08	hypothetical protein
B9J08_000081	1.18583	2.94e-07	hypothetical protein
B9J08_005538	1.18546	0.380604	hypothetical protein
B9J08_004366	1.18523	0.010115	hypothetical protein
B9J08_002985	1.17854	9.46e-07	hypothetical protein
B9J08_003455	1.17605	2.64e-08	hypothetical protein
B9J08_004787	1.1749	1.45e-05	hypothetical protein
B9J08_001698	1.17441	0.000286591	hypothetical protein
B9J08_002260	1.17425	9.92e-06	hypothetical protein
B9J08_001591	1.17207	0.0208791	glutamate decarboxylase
B9J08_002482	1.17175	1.15e-08	hypothetical protein
B9J08_004305	1.1682	6.85e-10	hypothetical protein
B9J08_000849	1.16603	0.321862	hypothetical protein
B9J08_003587	1.162	1.66e-07	hypothetical protein
B9J08_004878	1.16174	0.0253979	hypothetical protein
B9J08_001727	1.16128	1.17e-05	hypothetical protein
B9J08_002591	1.15724	0.000288896	hypothetical protein
B9J08_000789	1.15518	5.59e-08	hypothetical protein
B9J08_004309	1.1551	0.000233293	6-phosphofructokinase
B9J08_004788	1.15165	9.48e-07	hypothetical protein
B9J08_004032	1.14932	0.00016075	hypothetical protein
B9J08_002790	1.1472	2.68e-07	hypothetical protein
B9J08_002678	1.14715	0.00307185	hypothetical protein
B9J08_004895	1.14243	0.740516	hypothetical protein
B9J08_005552	1.14134	0.0478658	hypothetical protein
B9J08_001614	1.14047	0.0908088	5'/3'-nucleotidase SurE
B9J08_004635	1.14015	7.59e-05	cytochrome c oxidase assembly protein COX19
B9J08_003166	1.13906	0.000266953	hypothetical protein
B9J08_002847	1.13703	0.000152126	peroxisomal hydratase-dehydrogenase-epimerase
B9J08_002279	1.13543	5.74e-05	hypothetical protein
B9J08_003306	1.13016	0.0127075	glyceraldehyde-3-phosphate dehydrogenase
B9J08_004171	1.12828	3.23e-10	hypothetical protein
B9J08_003917	1.12768	1.4e-09	hypothetical protein
B9J08_001371	1.12116	0.000502293	hypothetical protein
B9J08_000446	1.1187	4.9e-07	hypothetical protein
B9J08_004534	1.11806	0.00187009	hypothetical protein
B9J08_000724	1.11246	9.02e-10	hypothetical protein
B9J08_004515	1.11148	0.00379881	hypothetical protein
B9J08_005308	1.11051	0.029662	hypothetical protein
B9J08_004830	1.10972	2.5e-11	hypothetical protein
B9J08_001499	1.10823	0.0178364	hypothetical protein
B9J08_000618	1.10322	1.23e-05	hypothetical protein
B9J08_000619	1.10305	3.48e-08	ubiquinone biosynthesis protein COQ4, mitochondrial
B9J08_002663	1.10056	0.0046787	hypothetical protein
B9J08_005266	1.10056	8.44e-06	hypothetical protein
B9J08_004854	1.09943	2.92e-05	hypothetical protein
B9J08_004467	1.09853	2.9e-05	hypothetical protein
B9J08_005386	1.09711	7.34e-07	hypothetical protein
B9J08_005187	1.0962	1.8e-05	hypothetical protein
B9J08_003632	1.09236	0.00343598	pyruvate kinase
B9J08_001326	1.09193	0.63035	tRNA-Leu
B9J08_002882	1.09106	0.001053	hypothetical protein
B9J08_001860	1.09087	0.00650916	phosphoglycerate kinase
B9J08_003732	1.0873	1.14e-09	hypothetical protein
B9J08_001993	1.08619	4.08e-05	hypothetical protein
B9J08_000617	1.08505	4.71e-05	hypothetical protein
B9J08_001206	1.08464	8.78e-05	hypothetical protein
B9J08_003181	1.07879	0.237081	hypothetical protein
B9J08_002631	1.07785	1.14e-05	hypothetical protein
B9J08_004546	1.07656	0.0702092	hypothetical protein
B9J08_000383	1.06308	2.57e-05	hypothetical protein
B9J08_002938	1.06244	1.38e-08	hypothetical protein
B9J08_003916	1.06117	2.19e-06	3,4-dihydroxy-2-butanone 4-phosphate synthase
B9J08_003662	1.05778	6.11e-05	hypothetical protein
B9J08_001344	1.0576	0.000947505	hypothetical protein
B9J08_004263	1.05717	7.01e-06	hypothetical protein
B9J08_004285	1.05402	0.000725602	heat shock protein 78, mitochondrial
B9J08_002777	1.05061	8.46e-07	hypothetical protein
B9J08_002439	1.04971	0.000189603	rpsU-divergently transcribed protein
B9J08_003341	1.04811	9.71e-11	hypothetical protein
B9J08_003542	1.04516	3.09e-06	hypothetical protein
B9J08_001389	1.04403	5.08e-06	phosphomevalonate kinase
B9J08_001484	1.04245	0.000504166	3-ketoacyl-CoA thiolase B, peroxisomal
B9J08_003291	1.04179	8.21e-05	hypothetical protein
B9J08_004236	1.03992	3.09e-05	hypothetical protein
B9J08_002248	1.03721	0.00237181	hypothetical protein
B9J08_005064	1.03319	0.000375096	hypothetical protein
B9J08_001542	1.03223	0.00158776	hypothetical protein
B9J08_002130	1.03076	0.0377294	hypothetical protein
B9J08_005098	1.0296	3.02e-07	hypothetical protein
B9J08_005063	1.02882	5.41e-05	hypothetical protein
B9J08_001479	1.02704	0.00352363	hypothetical protein
B9J08_003707	1.02359	0.000182709	hypothetical protein
B9J08_000007	1.02353	2.34e-06	hypothetical protein
B9J08_002533	1.01881	0.000466791	hypothetical protein
B9J08_004448	1.01875	3.2e-06	hypothetical protein
B9J08_001724	1.01472	0.000457372	hypothetical protein
B9J08_000238	1.01441	0.000475475	hypothetical protein
B9J08_000410	1.01429	0.000133468	hypothetical protein
B9J08_002792	1.01181	1.98e-06	hypothetical protein
B9J08_000500	1.00924	1.27e-06	hypothetical protein
B9J08_001194	1.00868	0.412886	hypothetical protein
B9J08_003064	1.00785	0.509364	tRNA-Glu
B9J08_000663	1.00462	0.00304856	hypothetical protein
B9J08_004967	1.00066	4.86e-05	hypothetical protein
B9J08_000387	1.00029	0.738769	tRNA-Lys
B9J08_003549	1.00029	0.738769	tRNA-Ser
B9J08_001161	0.997505	0.0174706	hypothetical protein
B9J08_002812	0.995556	0.559623	tRNA-Gln
B9J08_005102	0.995335	3.14e-05	hypothetical protein
B9J08_001508	0.991993	2.06e-05	hypothetical protein
B9J08_004033	0.9907	0.00144039	hypothetical protein
B9J08_000653	0.989576	8.65e-09	hypothetical protein
B9J08_003910	0.986554	0.0630211	hypothetical protein
B9J08_002542	0.982614	1.28e-06	hypothetical protein
B9J08_005451	0.981075	5.9e-05	hypothetical protein
B9J08_005093	0.979805	5.62e-05	hypothetical protein
B9J08_000448	0.977088	0.000671721	hypothetical protein
B9J08_000982	0.975908	0.000171798	hypothetical protein
B9J08_003269	0.97525	5.11e-05	hypothetical protein
B9J08_001930	0.975085	0.0388359	hypothetical protein
B9J08_005545	0.972298	0.00117338	hypothetical protein
B9J08_001595	0.970543	0.0943173	hypothetical protein
B9J08_000398	0.969781	0.000125214	hypothetical protein
B9J08_002255	0.968583	0.00307193	hypothetical protein
B9J08_004135	0.965353	0.000498618	hypothetical protein
B9J08_003611	0.964536	4.92e-05	hypothetical protein
B9J08_002684	0.963236	1.14e-05	hypothetical protein
B9J08_003836	0.962968	5.07e-08	hypothetical protein
B9J08_001174	0.962681	2.27e-09	hypothetical protein
B9J08_002552	0.959156	0.733457	hypothetical protein
B9J08_003573	0.957508	9.48e-05	hypothetical protein
B9J08_003621	0.956347	0.000120298	hypothetical protein
B9J08_000432	0.955888	2.14e-08	hypothetical protein
B9J08_003827	0.955677	0.400675	hypothetical protein
B9J08_004929	0.954068	2.45e-05	hypothetical protein
B9J08_003099	0.952698	0.0157495	thiamine thiazole synthase
B9J08_001361	0.950842	0.174158	hypothetical protein
B9J08_004327	0.948233	0.000875184	hypothetical protein
B9J08_003595	0.943576	0.044998	hypothetical protein
B9J08_003909	0.942774	0.00191199	hypothetical protein
B9J08_000487	0.941991	1.1e-05	hypothetical protein
B9J08_003342	0.941274	0.00137484	hypothetical protein
B9J08_000956	0.940719	0.28959	tRNA-Arg
B9J08_004087	0.939833	0.00018009	hypothetical protein
B9J08_003729	0.938938	0.000386602	hypothetical protein
B9J08_001584	0.938326	1.12e-06	hypothetical protein
B9J08_002975	0.937017	3.71e-06	hypothetical protein
B9J08_000030	0.935755	0.00307004	hypothetical protein
B9J08_001884	0.935384	0.00766837	biotin synthase, mitochondrial
B9J08_005000	0.935052	3.39e-06	hypothetical protein
B9J08_001197	0.934291	8.97e-05	hypothetical protein
B9J08_000477	0.932335	0.753783	tRNA-Gln
B9J08_003668	0.930726	0.0205064	hypothetical protein
B9J08_003268	0.927037	2.99e-05	hypothetical protein
B9J08_001443	0.926061	4.21e-05	hypothetical protein
B9J08_003318	0.925224	5.78e-06	hypothetical protein
B9J08_002791	0.923811	1.21e-05	hypothetical protein
B9J08_000828	0.922915	3.88e-05	hypothetical protein
B9J08_003613	0.921709	0.000183083	hypothetical protein
B9J08_005576	0.921643	0.260881	hypothetical protein
B9J08_004535	0.921319	0.0012017	hypothetical protein
B9J08_003355	0.920548	0.0229597	hypothetical protein
B9J08_002968	0.919827	0.00623754	hypothetical protein
B9J08_004405	0.916357	2.14e-07	hypothetical protein
B9J08_004454	0.916278	0.000652417	hypothetical protein
B9J08_000593	0.915772	0.00296929	hypothetical protein
B9J08_002027	0.915077	3.58e-05	hypothetical protein
B9J08_000035	0.913667	0.0083949	hypothetical protein
B9J08_001449	0.912159	3.72e-06	hypothetical protein
B9J08_000675	0.90603	4.74e-05	hypothetical protein
B9J08_003637	0.90536	5.01e-08	hypothetical protein
B9J08_000633	0.903889	1.97e-07	hypothetical protein
B9J08_003397	0.903807	0.0128875	hypothetical protein
B9J08_003614	0.903781	0.00398428	alcohol dehydrogenase 2
B9J08_002618	0.903574	4.36e-07	ATP-dependent protease La
B9J08_002848	0.901842	0.000415107	hypothetical protein
B9J08_003346	0.896048	0.000156899	hypothetical protein
B9J08_004785	0.894577	9.09e-05	hypothetical protein
B9J08_000157	0.89323	8.25e-08	hypothetical protein
B9J08_005425	0.892254	1.36e-05	cytochrome c oxidase assembly factor 3, mitochondrial
B9J08_004648	0.89105	0.0127993	hypothetical protein
B9J08_000460	0.88952	0.00284155	hypothetical protein
B9J08_000014	0.885534	0.000326489	hypothetical protein
B9J08_003911	0.882267	0.113394	hypothetical protein
B9J08_001205	0.8808	0.00204362	hydroxyethylthiazole kinase
B9J08_003683	0.880379	0.000209026	hypothetical protein
B9J08_005151	0.880313	0.000792651	hypothetical protein
B9J08_000695	0.879509	0.000153211	hypothetical protein
B9J08_002165	0.878682	0.000994385	hypothetical protein
B9J08_004477	0.878315	0.351493	hypothetical protein
B9J08_003063	0.873269	0.0404169	hypothetical protein
B9J08_004468	0.872322	0.0167827	hypothetical protein
B9J08_002038	0.87172	0.000264853	hypothetical protein
B9J08_001541	0.871497	0.000771787	hypothetical protein
B9J08_004109	0.870738	0.67706	hypothetical protein
B9J08_001952	0.869882	0.0589479	hypothetical protein
B9J08_004476	0.869771	0.0479058	hypothetical protein
B9J08_000246	0.869227	3.59e-06	hypothetical protein
B9J08_004792	0.867762	0.00404712	hypothetical protein
B9J08_001533	0.867651	0.0426035	hypothetical protein
B9J08_003283	0.866369	2.03e-05	hypothetical protein
B9J08_005323	0.866145	0.00370601	hypothetical protein
B9J08_004600	0.86595	0.0243652	hypothetical protein
B9J08_004838	0.86544	4.88e-06	NAD(P)H:quinone oxidoreductase, type IV
B9J08_000584	0.864182	7.91e-06	hypothetical protein
B9J08_004827	0.863458	0.000339283	hypothetical protein
B9J08_003292	0.86275	0.000328584	hypothetical protein
B9J08_000190	0.862527	0.000111283	hypothetical protein
B9J08_000579	0.861848	0.00851749	hypothetical protein
B9J08_003733	0.859377	0.000589145	hypothetical protein
B9J08_005520	0.85449	0.0714766	urate oxidase
B9J08_004639	0.853438	0.00583382	hypothetical protein
B9J08_002259	0.85309	1.61e-06	hypothetical protein
B9J08_003251	0.853054	0.013181	hypothetical protein
B9J08_001853	0.852221	0.00334882	hypothetical protein
B9J08_000829	0.849866	5.06e-06	hypothetical protein
B9J08_003465	0.849806	0.0871601	hypothetical protein
B9J08_004738	0.849358	7.24e-05	hypothetical protein
B9J08_001752	0.847116	0.000428707	hypothetical protein
B9J08_001324	0.846652	0.00838183	hypothetical protein
B9J08_000847	0.844914	0.000266094	hypothetical protein
B9J08_000067	0.844375	9.2e-05	hypothetical protein
B9J08_002558	0.8405	0.000263337	hypothetical protein
B9J08_001658	0.839864	0.00895039	hypothetical protein
B9J08_004466	0.839839	0.00606832	gamma-glutamyltransferase
B9J08_001391	0.839269	0.000234028	hypothetical protein
B9J08_003654	0.83794	0.00284725	hypothetical protein
B9J08_004722	0.836578	0.00212977	hypothetical protein
B9J08_002930	0.835367	0.00165684	hypothetical protein
B9J08_001733	0.834679	0.00440746	hypothetical protein
B9J08_004174	0.832425	0.40671	hypothetical protein
B9J08_004453	0.832007	3.83e-05	hypothetical protein
B9J08_005066	0.82927	3.64e-06	hypothetical protein
B9J08_004509	0.827772	1.46e-05	hypothetical protein
B9J08_002969	0.827592	1.62e-05	hypothetical protein
B9J08_003088	0.826871	0.0985671	hypothetical protein
B9J08_002889	0.825096	0.000688945	hypothetical protein
B9J08_004957	0.824737	0.00039121	hypothetical protein
B9J08_004697	0.823999	3.15e-05	hypothetical protein
B9J08_005232	0.822877	3.89e-07	hypothetical protein
B9J08_000925	0.822111	3.51e-05	hypothetical protein
B9J08_000292	0.82188	0.000586275	hypothetical protein
B9J08_002694	0.820759	0.00539752	hypothetical protein
B9J08_002119	0.820007	0.110353	hypothetical protein
B9J08_003728	0.819986	0.00593361	hypothetical protein
B9J08_005172	0.819383	0.000185703	hypothetical protein
B9J08_004553	0.818353	0.000275907	hypothetical protein
B9J08_005223	0.817392	1.88e-07	hypothetical protein
B9J08_001053	0.817291	0.00967761	hypothetical protein
B9J08_002040	0.816723	0.020068	hypothetical protein
B9J08_001219	0.815218	0.000121786	hypothetical protein
B9J08_002730	0.815116	0.0011295	hypothetical protein
B9J08_003496	0.813547	0.00316802	hypothetical protein
B9J08_004329	0.812885	2.39e-06	hypothetical protein
B9J08_004287	0.812211	0.020766	hypothetical protein
B9J08_005054	0.810203	0.000339444	hypothetical protein
B9J08_000358	0.809792	4.11e-07	hypothetical protein
B9J08_001052	0.809102	0.00217319	hypothetical protein
B9J08_001847	0.807842	0.000633966	hypothetical protein
B9J08_004444	0.807585	0.00545305	hypothetical protein
B9J08_001989	0.806828	1.57e-05	UTP-glucose-1-phosphate uridylyltransferase
B9J08_000265	0.805732	0.294369	5S ribosomal RNA
B9J08_003796	0.805708	0.000755143	hypothetical protein
B9J08_003227	0.805426	2.67e-06	hypothetical protein
B9J08_000187	0.804289	0.00195182	hypothetical protein
B9J08_000147	0.802929	6.28e-05	hypothetical protein
B9J08_001956	0.802067	0.0189618	hypothetical protein
B9J08_001590	0.800545	0.0270569	hypothetical protein
B9J08_001439	0.800392	0.000231706	hypothetical protein
B9J08_002405	0.80023	0.000309447	hypothetical protein
B9J08_001028	0.799126	9.96e-05	hypothetical protein
B9J08_000463	0.798633	5.86e-05	hypothetical protein
B9J08_002035	0.797822	0.00681967	hypothetical protein
B9J08_003958	0.796179	0.000941098	hypothetical protein
B9J08_002305	0.794895	0.000911971	hypothetical protein
B9J08_003096	0.794787	0.735432	tRNA-Ala
B9J08_004659	0.794255	0.000579911	hypothetical protein
B9J08_000253	0.793826	0.000584277	hypothetical protein
B9J08_002529	0.793538	9.9e-06	hypothetical protein
B9J08_002884	0.793417	0.0326826	hypothetical protein
B9J08_004985	0.792349	0.000846276	hypothetical protein
B9J08_004790	0.790238	0.0463469	hypothetical protein
B9J08_002121	0.789653	2.67e-06	hypothetical protein
B9J08_000639	0.788288	0.0131304	hypothetical protein
B9J08_001201	0.787586	0.00156772	hypothetical protein
B9J08_002011	0.785776	0.00107524	hypothetical protein
B9J08_003319	0.784238	7.42e-05	hypothetical protein
B9J08_005101	0.783185	0.000915693	3-hydroxyanthranilate 3,4-dioxygenase
B9J08_001372	0.782057	1.6e-05	hypothetical protein
B9J08_004177	0.781239	0.00612415	hypothetical protein
B9J08_005028	0.780427	0.00488212	hypothetical protein
B9J08_002655	0.778942	0.288218	hypothetical protein
B9J08_005239	0.777018	0.0168733	fructose-bisphosphate aldolase
B9J08_002397	0.776773	7.93e-06	hypothetical protein
B9J08_002166	0.774609	0.011273	hypothetical protein
B9J08_004052	0.774105	5.71e-06	hypothetical protein
B9J08_003276	0.773355	0.0115013	hypothetical protein
B9J08_001159	0.77102	0.00031885	hypothetical protein
B9J08_004805	0.770916	0.00240414	hypothetical protein
B9J08_005339	0.770501	0.0553401	hypothetical protein
B9J08_001963	0.769944	0.001471	hypothetical protein
B9J08_001986	0.769362	0.00997039	hypothetical protein
B9J08_001875	0.76915	0.0161173	triosephosphate isomerase
B9J08_005375	0.768836	7.17e-05	hypothetical protein
B9J08_003182	0.768703	0.000669441	hypothetical protein
B9J08_002230	0.764596	3.57e-06	hypothetical protein
B9J08_003229	0.761599	0.000216873	hypothetical protein
B9J08_001629	0.761083	0.8368	tRNA-Lys
B9J08_001794	0.761083	0.8368	tRNA-Ser
B9J08_004451	0.760005	0.00199086	hypothetical protein
B9J08_001748	0.758288	4.73e-05	hypothetical protein
B9J08_003808	0.758246	0.000427189	hypothetical protein
B9J08_003830	0.757282	0.513193	hypothetical protein
B9J08_003214	0.757072	5.07e-05	hypothetical protein
B9J08_002512	0.756299	0.000839874	hypothetical protein
B9J08_003488	0.755913	0.00067172	hypothetical protein
B9J08_004537	0.751878	0.0525787	OPT family small oligopeptide transporter
B9J08_004614	0.750166	0.160494	hypothetical protein
B9J08_005330	0.750132	6.76e-06	hypothetical protein
B9J08_004514	0.748361	0.0140472	hypothetical protein
B9J08_000610	0.748203	0.00236239	hypothetical protein
B9J08_004754	0.747994	0.00338391	histone
B9J08_000002	0.747417	0.0768321	hypothetical protein
B9J08_005231	0.746798	0.00186711	carbamoyl-phosphate synthase arginine-specific small chain
B9J08_001988	0.744869	0.000340054	hypothetical protein
B9J08_000017	0.743831	0.00125334	hypothetical protein
B9J08_003539	0.741716	0.000755072	hypothetical protein
B9J08_000001	0.740795	0.019412	hypothetical protein
B9J08_002159	0.73871	0.0789855	hypothetical protein
B9J08_000178	0.738142	0.0245316	oleate-induced peroxisomal protein POX18
B9J08_002514	0.736106	0.000222434	hypothetical protein
B9J08_001985	0.73535	0.0167411	hypothetical protein
B9J08_001570	0.733035	0.208948	hypothetical protein
B9J08_004031	0.732698	0.00114588	hypothetical protein
B9J08_002261	0.732536	0.000642151	hypothetical protein
B9J08_004831	0.731998	0.000198242	hypothetical protein
B9J08_002330	0.731774	0.00557042	hypothetical protein
B9J08_002036	0.731624	0.000247799	hypothetical protein
B9J08_000054	0.729172	0.00378178	hypothetical protein
B9J08_003800	0.728136	0.000184446	hypothetical protein
B9J08_003464	0.727712	0.00754979	hypothetical protein
B9J08_003751	0.727215	0.038992	hypothetical protein
B9J08_001507	0.72684	0.0177973	hypothetical protein
B9J08_004986	0.726062	0.000325067	hypothetical protein
B9J08_004375	0.725736	0.0258206	phosphoglycerate mutase
B9J08_003921	0.724531	0.000140222	hypothetical protein
B9J08_004858	0.724521	0.00022735	hypothetical protein
B9J08_000552	0.724017	0.00274989	hypothetical protein
B9J08_000095	0.723756	2.68e-05	hypothetical protein
B9J08_005272	0.723549	2.13e-05	hypothetical protein
B9J08_003439	0.723322	0.00124144	hypothetical protein
B9J08_004965	0.723129	0.056444	ribonucleoside-diphosphate reductase small chain
B9J08_000846	0.72189	0.0187761	hypothetical protein
B9J08_004123	0.721407	5.89e-05	hypothetical protein
B9J08_000679	0.721362	0.00369969	hypothetical protein
B9J08_001582	0.720454	0.00903952	hypothetical protein
B9J08_002842	0.720403	0.00219432	hypothetical protein
B9J08_003270	0.719061	0.00022381	hypothetical protein
B9J08_003499	0.719054	8.88e-05	hypothetical protein
B9J08_005107	0.718336	2.67e-05	hypothetical protein
B9J08_002302	0.717616	0.000128688	hypothetical protein
B9J08_001011	0.716129	0.00544297	hypothetical protein
B9J08_001778	0.714864	0.000792383	hypothetical protein
B9J08_000859	0.714766	0.00051898	hypothetical protein
B9J08_004962	0.714533	0.00297508	hypothetical protein
B9J08_002168	0.714458	0.000127486	hypothetical protein
B9J08_000036	0.712817	0.00516752	hypothetical protein
B9J08_001721	0.712619	0.00333212	hypothetical protein
B9J08_000274	0.712558	0.0271854	enolase 2
B9J08_000360	0.709529	0.000173468	hypothetical protein
B9J08_003480	0.707417	0.00392243	hypothetical protein
B9J08_004272	0.707262	0.00312788	hypothetical protein
B9J08_001826	0.706256	0.000129309	transcriptional activator hac1
B9J08_002463	0.70462	0.00253337	hypothetical protein
B9J08_001254	0.704374	4.89e-05	calcium/proton exchanger
B9J08_003734	0.703694	0.124619	hypothetical protein
B9J08_002383	0.702615	0.00286651	hypothetical protein
B9J08_004283	0.701612	0.0017407	hypothetical protein
B9J08_004110	0.701327	0.431115	hypothetical protein
B9J08_001111	0.697212	2.68e-05	hypothetical protein
B9J08_002105	0.696504	0.00335653	hypothetical protein
B9J08_003192	0.694974	0.000129955	hypothetical protein
B9J08_004946	0.69468	0.00277057	hypothetical protein
B9J08_001755	0.69401	0.0018162	hypothetical protein
B9J08_002940	0.693745	0.000121541	hypothetical protein
B9J08_001800	0.693673	0.000309302	hypothetical protein
B9J08_001383	0.690306	0.104025	hypothetical protein
B9J08_004964	0.68939	0.000106547	hypothetical protein
B9J08_005022	0.688359	0.000145956	hypothetical protein
B9J08_001089	0.687388	0.000902912	hypothetical protein
B9J08_004902	0.686508	0.000482402	hypothetical protein
B9J08_000812	0.685511	0.0131699	NADPH-dependent D-xylose reductase II,III
B9J08_004833	0.685024	0.047337	hypothetical protein
B9J08_001759	0.684007	0.00346316	hypothetical protein
B9J08_004930	0.683647	0.00252496	hypothetical protein
B9J08_000314	0.683274	0.00964546	hypothetical protein
B9J08_004209	0.682683	9.71e-05	hypothetical protein
B9J08_000288	0.679921	6.4e-05	hypothetical protein
B9J08_004926	0.679919	0.000118673	hypothetical protein
B9J08_001659	0.679561	0.00856065	hypothetical protein
B9J08_002547	0.678449	0.00055528	hypothetical protein
B9J08_000123	0.677333	0.00611069	hypothetical protein
B9J08_001914	0.676826	0.087162	hypothetical protein
B9J08_001536	0.676343	0.000199252	hypothetical protein
B9J08_004063	0.676227	0.852754	tRNA-His
B9J08_000845	0.675946	0.00283451	hypothetical protein
B9J08_000741	0.6753	0.0444099	hypothetical protein
B9J08_002021	0.674766	0.00227193	hypothetical protein
B9J08_001352	0.674092	0.000136147	hypothetical protein
B9J08_002937	0.673546	0.000148999	hypothetical protein
B9J08_004242	0.671638	0.000126802	hypothetical protein
B9J08_003943	0.671255	0.00137512	ribokinase
B9J08_002437	0.67022	0.00190329	hypothetical protein
B9J08_003167	0.668148	0.00109158	hypothetical protein
B9J08_003132	0.668098	0.0014292	hypothetical protein
B9J08_004282	0.668043	0.0119489	hypothetical protein
B9J08_003712	0.667857	0.000225486	hypothetical protein
B9J08_000465	0.66761	0.000798321	chorismate synthase
B9J08_001825	0.667172	8.22e-05	hypothetical protein
B9J08_000266	0.666123	0.01603	hypothetical protein
B9J08_000841	0.665878	0.000467766	hypothetical protein
B9J08_002991	0.665347	0.0372668	hypothetical protein
B9J08_003354	0.663805	0.00573149	hypothetical protein
B9J08_001987	0.663091	0.000555965	hypothetical protein
B9J08_004709	0.662871	0.00168636	hypothetical protein
B9J08_000682	0.66029	0.0109142	hydroxyacylglutathione hydrolase
B9J08_003317	0.659656	0.0176514	hypothetical protein
B9J08_003838	0.65666	0.00106332	N-acetylglucosamine-6-phosphate deacetylase
B9J08_005163	0.652086	0.00132306	hypothetical protein
B9J08_003570	0.65203	0.00420093	hypothetical protein
B9J08_000616	0.651781	0.000761988	hypothetical protein
B9J08_004961	0.651393	0.000538809	hypothetical protein
B9J08_004004	0.651147	0.00175048	hypothetical protein
B9J08_003513	0.650798	0.0118981	hypothetical protein
B9J08_005457	0.650736	5.06e-05	hypothetical protein
B9J08_004248	0.650579	0.00787084	hypothetical protein
B9J08_000600	0.650477	0.00171032	hypothetical protein
B9J08_001869	0.650471	0.000669185	hypothetical protein
B9J08_001091	0.649903	0.00110596	hypothetical protein
B9J08_001441	0.648675	0.0024382	hypothetical protein
B9J08_000280	0.648414	0.0016558	hypothetical protein
B9J08_005472	0.647277	0.0164374	hypothetical protein
B9J08_004507	0.646922	0.000335083	hypothetical protein
B9J08_000501	0.645678	0.0117225	hypothetical protein
B9J08_000665	0.645374	0.000215241	respiratory supercomplex factor 1, mitochondrial
B9J08_002886	0.645318	0.011942	hypothetical protein
B9J08_003592	0.645021	0.0114305	hypothetical protein
B9J08_002782	0.642954	0.00789062	hypothetical protein
B9J08_001291	0.642638	0.00261531	hypothetical protein
B9J08_001814	0.642333	0.0492135	hypothetical protein
B9J08_005464	0.641086	0.000351269	hypothetical protein
B9J08_001662	0.640921	0.826191	tRNA-Gly
B9J08_002919	0.638234	0.0126963	malate synthase, glyoxysomal
B9J08_000799	0.638207	0.00445118	hypothetical protein
B9J08_004764	0.63765	0.00145757	glutamate-5-semialdehyde dehydrogenase
B9J08_002017	0.636676	0.000498079	hypothetical protein
B9J08_000678	0.6365	0.000659153	hypothetical protein
B9J08_002788	0.636405	0.00293919	cAMP-dependent protein kinase type 2
B9J08_001679	0.636181	0.0108847	hypothetical protein
B9J08_000313	0.635414	0.00900518	hypothetical protein
B9J08_000615	0.63506	0.0111253	hypothetical protein
B9J08_004756	0.634748	0.00101187	hypothetical protein
B9J08_002713	0.633379	0.00747933	hypothetical protein
B9J08_003185	0.632843	0.00546804	acyl-CoA thioesterase II
B9J08_003345	0.632528	0.00881007	hypothetical protein
B9J08_002807	0.632304	0.000675139	hypothetical protein
B9J08_003566	0.632103	0.779849	tRNA-Ile
B9J08_001743	0.631766	0.00901674	hypothetical protein
B9J08_002478	0.63157	0.0045933	hypothetical protein
B9J08_005300	0.63154	0.0136682	hypothetical protein
B9J08_004637	0.629745	0.000812382	hypothetical protein
B9J08_000885	0.629453	0.0016339	hypothetical protein
B9J08_005351	0.628954	0.000734135	hypothetical protein
B9J08_000089	0.627679	0.00181366	hypothetical protein
B9J08_003726	0.626635	0.000208005	hypothetical protein
B9J08_000211	0.625849	0.00174499	hypothetical protein
B9J08_000668	0.625761	0.000479202	thiamine pyrophosphokinase
B9J08_005189	0.625491	0.0586937	hypothetical protein
B9J08_001404	0.624874	0.00102032	hypothetical protein
B9J08_004377	0.623307	0.00215714	hypothetical protein
B9J08_004602	0.62093	0.0981427	OPT family small oligopeptide transporter
B9J08_002942	0.620789	0.0168359	hypothetical protein
B9J08_000601	0.619012	0.00221567	hypothetical protein
B9J08_003307	0.61669	0.000611032	hypothetical protein
B9J08_005050	0.615813	0.00453323	hypothetical protein
B9J08_003599	0.6158	0.00026325	hypothetical protein
B9J08_000929	0.615188	0.000141751	hypothetical protein
B9J08_003235	0.614981	0.00813061	hypothetical protein
B9J08_000177	0.614276	0.00116428	hypothetical protein
B9J08_002635	0.613314	0.000608869	hypothetical protein
B9J08_000170	0.613188	0.0046425	hypothetical protein
B9J08_005575	0.61276	0.00611961	hypothetical protein
B9J08_002252	0.611577	0.0036787	hypothetical protein
B9J08_005091	0.611076	0.600422	tRNA-Trp
B9J08_003302	0.610916	0.00298499	hypothetical protein
B9J08_003038	0.610821	0.0228004	hypothetical protein
B9J08_004963	0.610348	0.000546638	hypothetical protein
B9J08_000644	0.610181	0.00219379	hypothetical protein
B9J08_001565	0.609482	0.00786036	hypothetical protein
B9J08_001919	0.609226	0.0142206	hypothetical protein
B9J08_002779	0.609065	0.00486203	ribosomal protein L14
B9J08_000316	0.609017	0.000316049	hypothetical protein
B9J08_000112	0.608763	0.00327848	hypothetical protein
B9J08_005196	0.608099	0.00824848	hypothetical protein
B9J08_005293	0.60791	0.0293857	hypothetical protein
B9J08_001725	0.607157	0.00596738	hypothetical protein
B9J08_005337	0.607028	0.0185247	hypothetical protein
B9J08_004475	0.606316	0.00339925	hypothetical protein
B9J08_003067	0.606031	0.000505607	hypothetical protein
B9J08_004389	0.605897	0.00037877	hypothetical protein
B9J08_001035	0.605727	0.000254741	hypothetical protein
B9J08_005578	0.605402	0.0046872	hypothetical protein
B9J08_002754	0.604364	0.00652248	hypothetical protein
B9J08_003193	0.604055	0.00208513	hypothetical protein
B9J08_000805	0.60348	0.00229238	hypothetical protein
B9J08_002665	0.603173	0.000203666	hypothetical protein
B9J08_004021	0.602568	0.279361	hypothetical protein
B9J08_003786	0.60165	0.0157445	hypothetical protein
B9J08_004002	0.601508	0.00487673	hypothetical protein
B9J08_005452	0.601416	0.000401672	hypothetical protein
B9J08_004849	0.599808	0.000356253	hypothetical protein
B9J08_000634	0.598538	0.0178332	hypothetical protein
B9J08_004616	0.597348	0.00223902	hypothetical protein
B9J08_002998	0.596343	0.000949016	hypothetical protein
B9J08_005570	0.596249	0.0235165	hypothetical protein
B9J08_003392	0.595988	0.0147113	hypothetical protein
B9J08_005551	0.594539	0.722323	hypothetical protein
B9J08_001143	0.593085	0.00542308	ferrochelatase
B9J08_003739	0.592708	0.00111075	hypothetical protein
B9J08_000010	0.592232	0.0249932	hypothetical protein
B9J08_002296	0.592136	0.050656	hypothetical protein
B9J08_000080	0.591973	0.00131244	hypothetical protein
B9J08_003581	0.591959	0.0378795	hypothetical protein
B9J08_000415	0.591569	0.00378651	hypothetical protein
B9J08_000624	0.590461	0.0126863	hypothetical protein
B9J08_000694	0.590415	0.024468	malate dehydrogenase, cytoplasmic
B9J08_004408	0.588637	0.000142118	hypothetical protein
B9J08_003231	0.588358	0.118379	hypothetical protein
B9J08_003237	0.588135	0.0340555	hypothetical protein
B9J08_004552	0.587605	0.0184058	hypothetical protein
B9J08_004508	0.587574	0.00267243	ubiquitin-conjugating enzyme E2 7
B9J08_004273	0.587472	0.00366566	cytochrome c oxidase subunit 6, mitochondrial
B9J08_004900	0.587104	0.0509428	hypothetical protein
B9J08_000369	0.585713	0.0185974	hypothetical protein
B9J08_004539	0.584609	0.00597076	hypothetical protein
B9J08_002683	0.584026	0.00420523	hypothetical protein
B9J08_003203	0.582983	0.0226453	hypothetical protein
B9J08_001718	0.582798	0.0173446	hypothetical protein
B9J08_001170	0.582717	0.00550148	protein URE2
B9J08_003385	0.582459	0.0023006	hypothetical protein
B9J08_000709	0.581987	0.00212214	hypothetical protein
B9J08_003340	0.581684	0.00531047	hypothetical protein
B9J08_003867	0.581244	0.00304587	hypothetical protein
B9J08_003831	0.581141	0.517744	tRNA-Glu
B9J08_003333	0.579653	0.00284414	hypothetical protein
B9J08_000899	0.577369	0.00125012	hypothetical protein
B9J08_000517	0.577333	0.00412863	hypothetical protein
B9J08_005396	0.577002	0.00987286	hypothetical protein
B9J08_001637	0.574886	0.23488	hypothetical protein
B9J08_004526	0.574646	0.00652116	hypothetical protein
B9J08_005580	0.57412	0.0342254	methylmalonate-semialdehyde dehydrogenase (acylating)
B9J08_003438	0.57405	0.0149909	hypothetical protein
B9J08_003174	0.573966	0.00391812	hypothetical protein
B9J08_001515	0.572083	0.0245445	hypothetical protein
B9J08_005219	0.572015	0.00109626	hypothetical protein
B9J08_005139	0.571359	0.00607965	hypothetical protein
B9J08_004583	0.570239	0.00363128	hypothetical protein
B9J08_005429	0.567905	0.00341541	hypothetical protein
B9J08_001083	0.567731	0.00131201	hypothetical protein
B9J08_001556	0.567377	0.0106251	hypothetical protein
B9J08_001274	0.56595	0.011578	hypothetical protein
B9J08_003818	0.563434	0.00672775	hypothetical protein
B9J08_004428	0.562824	0.103181	hypothetical protein
B9J08_003851	0.562331	0.0214179	hypothetical protein
B9J08_000347	0.5617	0.0029192	hypothetical protein
B9J08_000270	0.561381	0.000790988	hypothetical protein
B9J08_002526	0.56051	0.0259104	hypothetical protein
B9J08_001165	0.559547	0.00259574	hypothetical protein
B9J08_004173	0.558857	0.095673	hypothetical protein
B9J08_003332	0.55768	0.0358849	hypothetical protein
B9J08_004942	0.557606	0.00615572	hypothetical protein
B9J08_002781	0.557111	0.0405772	hypothetical protein
B9J08_000097	0.55617	0.00270788	hypothetical protein
B9J08_001368	0.554179	0.00500861	dihydroxyacetone kinase
B9J08_001697	0.552784	0.00458297	hypothetical protein
B9J08_004192	0.552627	0.00219384	hypothetical protein
B9J08_001613	0.552067	0.0247165	5'/3'-nucleotidase SurE
B9J08_001685	0.551649	0.0257543	hypothetical protein
B9J08_001402	0.550638	0.0221161	hypothetical protein
B9J08_001764	0.550619	0.00201676	hypothetical protein
B9J08_000436	0.550419	0.0034735	hypothetical protein
B9J08_001555	0.55025	0.00161474	hypothetical protein
B9J08_003633	0.549956	0.00190296	hypothetical protein
B9J08_003608	0.549522	0.00952781	hypothetical protein
B9J08_001973	0.54952	0.0011627	hypothetical protein
B9J08_000972	0.54874	0.00148708	hypothetical protein
B9J08_001115	0.548689	0.185367	hypothetical protein
B9J08_000568	0.548607	0.0893684	hypothetical protein
B9J08_004436	0.5484	0.0120392	hypothetical protein
B9J08_001395	0.548101	0.566404	tRNA-Trp
B9J08_003277	0.546822	0.0106857	hypothetical protein
B9J08_001009	0.546505	0.00234452	hypothetical protein
B9J08_003070	0.546316	0.0112041	hypothetical protein
B9J08_003453	0.545951	0.0136181	hypothetical protein
B9J08_005065	0.545363	0.00300227	hypothetical protein
B9J08_003386	0.545144	0.0262752	hypothetical protein
B9J08_004227	0.544867	0.000807907	hypothetical protein
B9J08_003740	0.54432	0.00647253	hypothetical protein
B9J08_005131	0.544215	0.0213702	E1-like protein-activating enzyme Gsa7p/Apg7p
B9J08_004607	0.542286	0.0101414	hypothetical protein
B9J08_005487	0.541253	0.117756	hypothetical protein
B9J08_001235	0.541151	0.00164548	hypothetical protein
B9J08_002449	0.54075	0.0183043	GTP cyclohydrolase-2
B9J08_001348	0.540494	0.00653596	hypothetical protein
B9J08_001946	0.540318	0.0142645	hypothetical protein
B9J08_005198	0.539629	0.00957248	hypothetical protein
B9J08_003794	0.538389	0.00163169	hypothetical protein
B9J08_002821	0.536834	0.00158712	hypothetical protein
B9J08_005109	0.535327	0.0237684	hypothetical protein
B9J08_001226	0.535197	0.0407	hypothetical protein
B9J08_000808	0.53464	0.0409802	glucose-6-phosphate isomerase
B9J08_002904	0.533192	0.0444105	hypothetical protein
B9J08_005379	0.532029	0.0614674	hypothetical protein
B9J08_001255	0.53167	0.0867456	alpha-glucosidase
B9J08_004023	0.531035	0.00444011	hypothetical protein
B9J08_001538	0.530974	0.380299	hypothetical protein
B9J08_004333	0.530705	0.0407316	hypothetical protein
B9J08_000623	0.529161	0.0102585	hypothetical protein
B9J08_004634	0.527753	0.521371	hypothetical protein
B9J08_001154	0.52728	0.580036	tRNA-Leu
B9J08_005514	0.526792	0.0155547	hypothetical protein
B9J08_004531	0.526285	0.0328975	agmatinase
B9J08_002256	0.524421	0.0837619	hypothetical protein
B9J08_000810	0.523988	0.00457098	hypothetical protein
B9J08_001898	0.523008	0.0113788	hypothetical protein
B9J08_000664	0.522697	0.00600203	hypothetical protein
B9J08_000749	0.521981	0.00271026	hypothetical protein
B9J08_003788	0.521438	0.00602173	hypothetical protein
B9J08_004698	0.519573	0.00681184	hypothetical protein
B9J08_002409	0.519142	0.0136003	hypothetical protein
B9J08_000287	0.519127	0.00208285	hypothetical protein
B9J08_005513	0.51908	0.0475264	hypothetical protein
B9J08_002862	0.518938	0.0145414	hypothetical protein
B9J08_003564	0.518149	0.0191894	hypothetical protein
B9J08_003165	0.518024	0.00364743	hypothetical protein
B9J08_004265	0.517701	0.012424	hypothetical protein
B9J08_004291	0.517328	0.0184718	hypothetical protein
B9J08_003252	0.517259	0.0176605	hypothetical protein
B9J08_002955	0.517176	0.0083529	hypothetical protein
B9J08_005333	0.516982	0.0549236	hypothetical protein
B9J08_000317	0.514914	0.0101965	hypothetical protein
B9J08_001102	0.513921	0.0127457	hypothetical protein
B9J08_003703	0.513677	0.293336	hypothetical protein
B9J08_000905	0.513201	0.0334482	hypothetical protein
B9J08_004570	0.512351	0.011868	hypothetical protein
B9J08_001416	0.512346	0.0115639	hypothetical protein
B9J08_000594	0.511155	0.00605733	hypothetical protein
B9J08_005230	0.510977	0.00430024	60S ribosomal protein L20-A
B9J08_001969	0.509451	0.00389055	hypothetical protein
B9J08_000977	0.509259	0.00577034	hypothetical protein
B9J08_001123	0.507911	0.00430435	hypothetical protein
B9J08_003593	0.50695	0.00757464	hypothetical protein
B9J08_004126	0.504875	0.0124746	hypothetical protein
B9J08_000361	0.504805	0.0885375	hypothetical protein
B9J08_001551	0.503803	0.0223258	hypothetical protein
B9J08_000491	0.503676	0.0165093	hypothetical protein
B9J08_000158	0.50262	0.0151917	hypothetical protein
B9J08_001084	0.502412	0.00265308	hypothetical protein
B9J08_000058	0.502196	0.0118123	pyridoxine biosynthesis protein SNZ1
B9J08_002180	0.501437	0.0656446	hypothetical protein
B9J08_005135	0.501351	0.00788583	hypothetical protein
B9J08_000687	0.501067	0.0111662	hypothetical protein
B9J08_003947	0.499986	0.00341488	hypothetical protein
B9J08_000671	0.49986	0.0242586	hypothetical protein
B9J08_002789	0.498945	0.00211196	hypothetical protein
B9J08_004925	0.49893	0.0159731	hypothetical protein
B9J08_003551	0.498585	0.0285499	hypothetical protein
B9J08_005474	0.498055	0.035451	hypothetical protein
B9J08_003948	0.4971	0.0073891	hypothetical protein
B9J08_000863	0.497017	0.0287891	4-aminobutyrate aminotransferase
B9J08_002737	0.496793	0.0354232	hypothetical protein
B9J08_001550	0.496299	0.385379	hypothetical protein
B9J08_000858	0.495299	0.00331135	hypothetical protein
B9J08_005380	0.494551	0.0115221	hypothetical protein
B9J08_001811	0.493857	0.0133986	hypothetical protein
B9J08_003825	0.493685	0.0316773	hypothetical protein
B9J08_000620	0.493511	0.00233127	hypothetical protein
B9J08_003152	0.492726	0.0207332	hypothetical protein
B9J08_000800	0.492672	0.0047498	adenylosuccinate lyase
B9J08_001098	0.492574	0.00939802	purine nucleoside phosphorylase I, inosine and guanosine-specific
B9J08_005540	0.492432	0.82222	hypothetical protein
B9J08_000606	0.492363	0.638821	hypothetical protein
B9J08_004527	0.492332	0.013547	hypothetical protein
B9J08_002253	0.491533	0.0709507	hypothetical protein
B9J08_005527	0.490982	0.0364524	holo-[acyl-carrier-protein] synthase
B9J08_002837	0.490888	0.0572547	hypothetical protein
B9J08_001173	0.490798	0.0137171	hypothetical protein
B9J08_000818	0.490499	0.0219219	hypothetical protein
B9J08_002143	0.489795	0.0623743	hypothetical protein
B9J08_000642	0.489178	0.102423	hypothetical protein
B9J08_003228	0.488742	0.0149865	hypothetical protein
B9J08_000152	0.488655	0.0319934	hypothetical protein
B9J08_003852	0.488442	0.0168512	mannan endo-1,6-alpha-mannosidase DCW1
B9J08_005206	0.487311	0.0785937	hypothetical protein
B9J08_000124	0.486421	0.00347762	hypothetical protein
B9J08_004666	0.486412	0.034132	hypothetical protein
B9J08_001489	0.486271	0.0623402	hypothetical protein
B9J08_002695	0.486105	0.530407	hypothetical protein
B9J08_003623	0.48588	0.00356649	hypothetical protein
B9J08_000365	0.485569	0.00733211	hypothetical protein
B9J08_004179	0.485526	0.0282198	hypothetical protein
B9J08_001164	0.48465	0.00927045	hypothetical protein
B9J08_001692	0.48455	0.00584033	hypothetical protein
B9J08_000140	0.483872	0.0174687	hypothetical protein
B9J08_001223	0.483633	0.0493052	hypothetical protein
B9J08_001663	0.483321	0.024196	hypothetical protein
B9J08_005242	0.482782	0.0151149	hypothetical protein
B9J08_003191	0.482695	0.0480205	hypothetical protein
B9J08_002415	0.482642	0.0433924	hypothetical protein
B9J08_003442	0.482543	0.0373511	peroxiredoxin HYR1
B9J08_000411	0.480638	0.0666307	hypothetical protein
B9J08_005182	0.479571	0.581468	hypothetical protein
B9J08_003351	0.479397	0.0183102	hypothetical protein
B9J08_000298	0.479381	0.00999057	hypothetical protein
B9J08_002189	0.479323	0.0307695	hypothetical protein
B9J08_004641	0.478595	0.02803	hypothetical protein
B9J08_004096	0.478403	0.594701	hypothetical protein
B9J08_002361	0.478157	0.0421731	hypothetical protein
B9J08_003380	0.477544	0.00733429	hypothetical protein
B9J08_003050	0.476671	0.0130172	hypothetical protein
B9J08_001664	0.476281	0.0152005	hypothetical protein
B9J08_002014	0.476175	0.0127418	hypothetical protein
B9J08_001829	0.475105	0.0133542	hypothetical protein
B9J08_002646	0.474676	0.0260947	hypothetical protein
B9J08_001311	0.473693	0.0441689	cofilin
B9J08_002657	0.47358	0.0102297	hypothetical protein
B9J08_004692	0.473361	0.0809932	hypothetical protein
B9J08_001297	0.473209	0.00639831	hypothetical protein
B9J08_003604	0.472954	0.0196479	hypothetical protein
B9J08_000643	0.471962	0.00665008	hypothetical protein
B9J08_005002	0.471695	0.0317049	hypothetical protein
B9J08_004581	0.470989	0.0428968	hypothetical protein
B9J08_004586	0.470087	0.0327249	hypothetical protein
B9J08_003183	0.469651	0.00671035	hypothetical protein
B9J08_005036	0.468731	0.0140994	hypothetical protein
B9J08_000651	0.468586	0.00388063	hypothetical protein
B9J08_004316	0.468567	0.00568148	hypothetical protein
B9J08_002584	0.468038	0.829605	hypothetical protein
B9J08_003689	0.467157	0.00750997	hypothetical protein
B9J08_000388	0.466643	0.0186233	hypothetical protein
B9J08_001937	0.465895	0.0248518	hypothetical protein
B9J08_005309	0.465202	0.0266102	hypothetical protein
B9J08_000056	0.464445	0.00403614	hypothetical protein
B9J08_002169	0.464383	0.00514639	hypothetical protein
B9J08_001204	0.464261	0.125945	hypothetical protein
B9J08_000128	0.464244	0.0442076	hypothetical protein
B9J08_001742	0.463304	0.141868	hypothetical protein
B9J08_002417	0.463286	0.159881	hypothetical protein
B9J08_002670	0.462532	0.00580997	hypothetical protein
B9J08_003451	0.46241	0.054609	hypothetical protein
B9J08_002389	0.460565	0.0790471	hypothetical protein
B9J08_000389	0.459039	0.325041	hypothetical protein
B9J08_001959	0.458933	0.00988071	histidine protein kinase NIK1
B9J08_003222	0.458847	0.674519	tRNA-Gln
B9J08_005447	0.458554	0.0235414	rab GDP-dissociation inhibitor
B9J08_001929	0.458398	0.00730714	hypothetical protein
B9J08_002997	0.458397	0.00573888	hypothetical protein
B9J08_004661	0.458311	0.0476465	hypothetical protein
B9J08_001431	0.458006	0.00746788	hypothetical protein
B9J08_000871	0.457363	0.0922859	hypothetical protein
B9J08_000197	0.45663	0.304683	hypothetical protein
B9J08_002273	0.456207	0.00477198	prohibitin-1
B9J08_000325	0.456084	0.10096	hypothetical protein
B9J08_004226	0.455471	0.0156068	hypothetical protein
B9J08_004551	0.455328	0.0831673	hypothetical protein
B9J08_000504	0.455211	0.00858678	hypothetical protein
B9J08_002843	0.455122	0.0115144	hypothetical protein
B9J08_002647	0.454529	0.0314395	hypothetical protein
B9J08_001997	0.454044	0.0539999	hypothetical protein
B9J08_005045	0.453513	0.131089	hypothetical protein
B9J08_001394	0.453344	0.0138469	hypothetical protein
B9J08_003767	0.453318	0.0289537	cytidine deaminase
B9J08_005197	0.453304	0.0247732	hypothetical protein
B9J08_001715	0.452653	0.0263166	uridine kinase
B9J08_001861	0.452303	0.0169513	hypothetical protein
B9J08_003005	0.452031	0.0128523	hypothetical protein
B9J08_001731	0.451586	0.0121105	hypothetical protein
B9J08_003920	0.451209	0.0152788	hypothetical protein
B9J08_000529	0.45061	0.0222156	hypothetical protein
B9J08_005202	0.450573	0.0181551	hypothetical protein
B9J08_001244	0.45052	0.0408955	hypothetical protein
B9J08_001213	0.450469	0.0780437	hypothetical protein
B9J08_000472	0.450112	0.0164116	hypothetical protein
B9J08_002794	0.44932	0.049453	hypothetical protein
B9J08_001008	0.449273	0.0204743	hypothetical protein
B9J08_004249	0.44851	0.0476923	hypothetical protein
B9J08_002870	0.448271	0.0307743	hypothetical protein
B9J08_003299	0.448226	0.0182366	actin cytoskeleton-regulatory complex protein END3
B9J08_004442	0.448121	0.00913992	hypothetical protein
B9J08_004711	0.44768	0.00934157	hypothetical protein
B9J08_004134	0.447432	0.0249402	hypothetical protein
B9J08_002509	0.447429	0.102566	hypothetical protein
B9J08_001030	0.447404	0.0323756	hypothetical protein
B9J08_001962	0.446954	0.00704352	hypothetical protein
B9J08_004751	0.446657	0.00893184	hypothetical protein
B9J08_004351	0.445614	0.12656	hypothetical protein
B9J08_004718	0.445323	0.0520311	hypothetical protein
B9J08_005270	0.444981	0.0131019	hypothetical protein
B9J08_002455	0.444298	0.0122169	hypothetical protein
B9J08_002536	0.443622	0.0677202	hypothetical protein
B9J08_000258	0.443488	0.114069	hypothetical protein
B9J08_005283	0.443306	0.029801	hypothetical protein
B9J08_002567	0.442709	0.0127106	hypothetical protein
B9J08_000485	0.441627	0.0449038	hypothetical protein
B9J08_000530	0.441594	0.0110051	hypothetical protein
B9J08_004334	0.441083	0.0545057	hypothetical protein
B9J08_005060	0.440924	0.0313744	hypothetical protein
B9J08_005310	0.440422	0.117726	hypothetical protein
B9J08_004362	0.440286	0.00986488	hypothetical protein
B9J08_003105	0.439983	0.029353	threonine ammonia-lyase, biosynthetic
B9J08_005260	0.439813	0.00833552	hypothetical protein
B9J08_005459	0.43931	0.0343318	hypothetical protein
B9J08_004175	0.439219	0.554678	hypothetical protein
B9J08_001032	0.439187	0.0138153	hypothetical protein
B9J08_001801	0.438522	0.0251912	hypothetical protein
B9J08_002141	0.438166	0.0214595	hypothetical protein
B9J08_002065	0.437961	0.0244879	hypothetical protein
B9J08_004721	0.437763	0.00864335	hypothetical protein
B9J08_002818	0.436869	0.018997	hypothetical protein
B9J08_000704	0.43678	0.00653037	hypothetical protein
B9J08_001101	0.436139	0.00888949	hypothetical protein
B9J08_001817	0.43524	0.0197969	hypothetical protein
B9J08_003690	0.435229	0.127413	hypothetical protein
B9J08_004717	0.433091	0.0209145	hypothetical protein
B9J08_003607	0.432549	0.0232911	hypothetical protein
B9J08_004344	0.4318	0.0218914	hypothetical protein
B9J08_004199	0.431415	0.789521	tRNA-Gly
B9J08_000890	0.430952	0.0132985	hypothetical protein
B9J08_003837	0.43084	0.0343691	glucosamine-6-phosphate isomerase
B9J08_000060	0.430096	0.0457312	hypothetical protein
B9J08_001790	0.429548	0.0157735	hypothetical protein
B9J08_002123	0.429379	0.0293052	hypothetical protein
B9J08_001369	0.42917	0.183533	hypothetical protein
B9J08_002654	0.429134	0.046129	hypothetical protein
B9J08_001180	0.428625	0.360976	hypothetical protein
B9J08_000146	0.428403	0.239799	hypothetical protein
B9J08_005088	0.427629	0.0584348	hypothetical protein
B9J08_003419	0.427158	0.0349939	hypothetical protein
B9J08_001999	0.426492	0.137657	aspartate-tRNA ligase
B9J08_001621	0.425565	0.0958158	hypothetical protein
B9J08_005280	0.42507	0.113773	hypothetical protein
B9J08_004974	0.425038	0.0226427	hypothetical protein
B9J08_003266	0.423519	0.194369	hypothetical protein
B9J08_004068	0.423328	0.0166356	vacuolar protein sorting-associated protein 4
B9J08_001398	0.423294	0.0178994	hypothetical protein
B9J08_002958	0.422389	0.0221865	hypothetical protein
B9J08_004429	0.421917	0.21352	hypothetical protein
B9J08_001677	0.421405	0.0284511	hypothetical protein
B9J08_003197	0.421007	0.0171242	hypothetical protein
B9J08_001039	0.419681	0.00689159	TIGR01456 family HAD hydrolase
B9J08_000873	0.419534	0.0234105	mRNA 3'-end-processing protein YTH1
B9J08_003310	0.419413	0.019047	hypothetical protein
B9J08_005292	0.418641	0.0910472	hypothetical protein
B9J08_000948	0.418474	0.0397834	hypothetical protein
B9J08_003443	0.417687	0.0707584	hypothetical protein
B9J08_003578	0.417208	0.0232365	hypothetical protein
B9J08_000272	0.417056	0.03596	clathrin-associated protein AP-3 complex component APS3
B9J08_000811	0.41687	0.0466666	hypothetical protein
B9J08_000652	0.416847	0.286757	hypothetical protein
B9J08_000533	0.4166	0.0354287	hypothetical protein
B9J08_003989	0.415935	0.0223293	hypothetical protein
B9J08_002959	0.415439	0.0181983	hypothetical protein
B9J08_005420	0.415268	0.535819	hypothetical protein
B9J08_003992	0.414982	0.00918879	hypothetical protein
B9J08_005077	0.414806	0.0718089	hypothetical protein
B9J08_004989	0.414218	0.0851936	hypothetical protein
B9J08_002739	0.413133	0.0113763	hypothetical protein
B9J08_002275	0.412252	0.0524066	hypothetical protein
B9J08_003275	0.410649	0.0357923	hypothetical protein
B9J08_004241	0.41056	0.0144895	hypothetical protein
B9J08_000098	0.41048	0.067138	hypothetical protein
B9J08_001285	0.410307	0.0181921	hypothetical protein
B9J08_004615	0.40966	0.148068	hypothetical protein
B9J08_003681	0.408619	0.0242425	hypothetical protein
B9J08_001857	0.408251	0.0198549	hypothetical protein
B9J08_004062	0.408138	0.0460352	hypothetical protein
B9J08_004343	0.40802	0.0181089	hypothetical protein
B9J08_002398	0.407947	0.0645333	hypothetical protein
B9J08_004645	0.407728	0.0442793	hypothetical protein
B9J08_002515	0.407704	0.0493378	hypothetical protein
B9J08_004819	0.407022	0.107477	hypothetical protein
B9J08_000843	0.406481	0.034354	hypothetical protein
B9J08_001572	0.406465	0.0201725	hypothetical protein
B9J08_000029	0.406438	0.200107	hypothetical protein
B9J08_004772	0.405558	0.0270515	hypothetical protein
B9J08_000717	0.405129	0.0713187	hypothetical protein
B9J08_001259	0.404992	0.0257549	hypothetical protein
B9J08_004859	0.404961	0.014339	hypothetical protein
B9J08_004832	0.404184	0.0621579	hypothetical protein
B9J08_004180	0.403698	0.0409166	hypothetical protein
B9J08_003998	0.402961	0.288478	acetyl-coenzyme A synthetase 1
B9J08_000666	0.402956	0.0221143	hypothetical protein
B9J08_001152	0.402273	0.0109259	hypothetical protein
B9J08_000326	0.402179	0.0386502	protoporphyrinogen oxidase
B9J08_004419	0.401802	0.0452067	hypothetical protein
B9J08_001552	0.401377	0.0355236	hypothetical protein
B9J08_002972	0.401	0.0204407	methionine-R-sulfoxide reductase
B9J08_001961	0.400809	0.0201088	hypothetical protein
B9J08_004365	0.399417	0.0295147	succinate/fumarate mitochondrial transporter
B9J08_002707	0.399142	0.0190782	hypothetical protein
B9J08_003704	0.39901	0.484531	hypothetical protein
B9J08_000155	0.398844	0.0322233	hypothetical protein
B9J08_001754	0.398827	0.0147645	hypothetical protein
B9J08_002545	0.398065	0.0204742	hypothetical protein
B9J08_003835	0.397927	0.0143071	hypothetical protein
B9J08_004015	0.397874	0.199293	hypothetical protein
B9J08_005061	0.396997	0.0313927	hypothetical protein
B9J08_002579	0.396891	0.252118	hypothetical protein
B9J08_005437	0.396611	0.130644	hypothetical protein
B9J08_002425	0.395666	0.0466231	hypothetical protein
B9J08_002278	0.395445	0.0200532	hypothetical protein
B9J08_000250	0.394947	0.0473709	hypothetical protein
B9J08_001310	0.394866	0.650258	tRNA-OTHER
B9J08_003065	0.394687	0.121991	hypothetical protein
B9J08_001678	0.394614	0.0644238	hypothetical protein
B9J08_002456	0.394438	0.0356942	hypothetical protein
B9J08_002005	0.394145	0.0418817	hypothetical protein
B9J08_005157	0.393615	0.0359928	hypothetical protein
B9J08_002920	0.393067	0.0653178	glutaredoxin
B9J08_002915	0.392939	0.0408478	hypothetical protein
B9J08_003265	0.392918	0.0325074	hypothetical protein
B9J08_001160	0.392412	0.0927992	hypothetical protein
B9J08_004653	0.391349	0.0254577	hypothetical protein
B9J08_003986	0.39043	0.038091	hypothetical protein
B9J08_000114	0.390026	0.0312801	hypothetical protein
B9J08_003706	0.389481	0.342704	hypothetical protein
B9J08_004948	0.388825	0.0396343	hypothetical protein
B9J08_002711	0.388541	0.0412189	hypothetical protein
B9J08_003534	0.388178	0.0609182	hypothetical protein
B9J08_000385	0.388136	0.0153478	hypothetical protein
B9J08_003509	0.38783	0.0309998	hypothetical protein
B9J08_002992	0.387024	0.11357	hypothetical protein
B9J08_005215	0.386865	0.0325943	hypothetical protein
B9J08_001996	0.386169	0.0964762	hypothetical protein
B9J08_003516	0.385441	0.0972416	hypothetical protein
B9J08_002876	0.385369	0.030305	calmodulin
B9J08_003462	0.385301	0.038287	peroxisomal targeting signal receptor
B9J08_000023	0.38526	0.0195579	aminopeptidase 2
B9J08_000115	0.383779	0.016919	hypothetical protein
B9J08_005006	0.383251	0.0640721	hypothetical protein
B9J08_004011	0.383218	0.0254146	hypothetical protein
B9J08_001370	0.383133	0.599643	hypothetical protein
B9J08_001264	0.382445	0.0381711	cytochrome c oxidase assembly protein COX16, mitochondrial
B9J08_002369	0.382395	0.0354926	hypothetical protein
B9J08_002314	0.382109	0.0412156	hypothetical protein
B9J08_004138	0.381238	0.0135857	hypothetical protein
B9J08_005366	0.38121	0.0140845	hypothetical protein
B9J08_000892	0.38032	0.375079	hypothetical protein
B9J08_000307	0.379776	0.0182144	hypothetical protein
B9J08_005291	0.379581	0.263291	hypothetical protein
B9J08_004905	0.379557	0.182403	hypothetical protein
B9J08_002576	0.379543	0.120815	hypothetical protein
B9J08_001373	0.379158	0.0260555	hypothetical protein
B9J08_001900	0.379148	0.0375955	hypothetical protein
B9J08_005523	0.379051	0.0254671	hypothetical protein
B9J08_000154	0.378303	0.0806937	hypothetical protein
B9J08_004042	0.378301	0.0319067	hypothetical protein
B9J08_001003	0.378235	0.0900687	hypothetical protein
B9J08_000677	0.377891	0.0524704	arsenical-resistance protein
B9J08_004774	0.377664	0.0204568	hypothetical protein
B9J08_002393	0.377134	0.0704791	hypothetical protein
B9J08_004803	0.376868	0.125239	hypothetical protein
B9J08_004554	0.376705	0.037923	hypothetical protein
B9J08_004931	0.376602	0.0874722	hypothetical protein
B9J08_002377	0.376583	0.152459	hypothetical protein
B9J08_004710	0.37624	0.0430567	hypothetical protein
B9J08_002699	0.375717	0.0294604	hypothetical protein
B9J08_000759	0.375564	0.0689588	hypothetical protein
B9J08_001478	0.374602	0.0359639	riboflavin synthase, alpha subunit
B9J08_005140	0.374594	0.13323	hypothetical protein
B9J08_000457	0.37421	0.155533	hypothetical protein
B9J08_001253	0.373663	0.0359601	hypothetical protein
B9J08_003809	0.373613	0.061327	6-phosphogluconolactonase
B9J08_003964	0.373602	0.0185909	hypothetical protein
B9J08_004729	0.373058	0.0374611	hypothetical protein
B9J08_003376	0.372891	0.0392969	hypothetical protein
B9J08_000958	0.372814	0.153643	hypothetical protein
B9J08_005285	0.372791	0.0448462	hypothetical protein
B9J08_000598	0.372421	0.0381897	hypothetical protein
B9J08_000022	0.372219	0.04271	hypothetical protein
B9J08_003285	0.372073	0.132652	hypothetical protein
B9J08_002099	0.372008	0.0404275	hypothetical protein
B9J08_000773	0.371897	0.0371588	hypothetical protein
B9J08_004010	0.371838	0.0647613	hypothetical protein
B9J08_001339	0.371337	0.275515	hypothetical protein
B9J08_000716	0.37114	0.240272	hypothetical protein
B9J08_000848	0.370984	0.0380713	hypothetical protein
B9J08_005436	0.370542	0.0289682	hypothetical protein
B9J08_003765	0.370435	0.0439565	hypothetical protein
B9J08_002836	0.369936	0.103789	hypothetical protein
B9J08_001563	0.369874	0.103964	hypothetical protein
B9J08_004463	0.369275	0.0545031	hypothetical protein
B9J08_005354	0.369262	0.0482017	hypothetical protein
B9J08_001289	0.368586	0.0247769	hypothetical protein
B9J08_004944	0.367513	0.17164	hypothetical protein
B9J08_001293	0.367199	0.0346364	OPT family small oligopeptide transporter
B9J08_005190	0.366817	0.0339782	hypothetical protein
B9J08_002839	0.366359	0.116499	hypothetical protein
B9J08_004195	0.366308	0.593532	hypothetical protein
B9J08_002867	0.366033	0.0803101	hypothetical protein
B9J08_001315	0.365679	0.114904	allantoicase
B9J08_003606	0.365595	0.0424538	hypothetical protein
B9J08_003750	0.365259	0.0499798	hypothetical protein
B9J08_005007	0.365155	0.0992209	hypothetical protein
B9J08_002459	0.364495	0.139781	sphingolipid long chain base-responsive protein LSP1
B9J08_004065	0.364014	0.0245342	hypothetical protein
B9J08_003470	0.364011	0.0579282	hypothetical protein
B9J08_005245	0.363783	0.165477	hypothetical protein
B9J08_003046	0.363562	0.0789462	hypothetical protein
B9J08_005397	0.362946	0.148822	hypothetical protein
B9J08_004168	0.362774	0.0556912	hypothetical protein
B9J08_003665	0.362454	0.0205059	hypothetical protein
B9J08_000478	0.362339	0.0929083	hypothetical protein
B9J08_003469	0.362216	0.0633731	hypothetical protein
B9J08_002333	0.360848	0.250588	hypothetical protein
B9J08_004904	0.360553	0.0347112	hypothetical protein
B9J08_000658	0.360254	0.0389948	hypothetical protein
B9J08_004908	0.360058	0.063	hypothetical protein
B9J08_001181	0.359671	0.065894	hypothetical protein
B9J08_000071	0.359511	0.144986	sphingolipid long chain base-responsive protein PIL1
B9J08_002534	0.359275	0.0586874	hypothetical protein
B9J08_002727	0.358698	0.036142	hypothetical protein
B9J08_005288	0.358198	0.067613	hypothetical protein
B9J08_004545	0.358178	0.155957	OPT family small oligopeptide transporter
B9J08_002543	0.357654	0.0646955	hypothetical protein
B9J08_004518	0.356604	0.19343	hypothetical protein
B9J08_001838	0.356348	0.0640263	hypothetical protein
B9J08_002895	0.355585	0.0342569	hypothetical protein
B9J08_004116	0.354769	0.0506297	hypothetical protein
B9J08_003262	0.35459	0.0407034	hypothetical protein
B9J08_000471	0.354047	0.0376019	hypothetical protein
B9J08_005334	0.353356	0.113846	hypothetical protein
B9J08_004142	0.352732	0.10077	hypothetical protein
B9J08_000561	0.35263	0.0400337	hypothetical protein
B9J08_004726	0.351865	0.0538661	hypothetical protein
B9J08_004233	0.351345	0.0523628	hypothetical protein
B9J08_005275	0.351336	0.0480874	hypothetical protein
B9J08_005477	0.351228	0.147998	hypothetical protein
B9J08_001200	0.351219	0.0526679	hypothetical protein
B9J08_003051	0.351045	0.0690106	hypothetical protein
B9J08_001388	0.350708	0.0686862	hypothetical protein
B9J08_004200	0.350459	0.105714	hypothetical protein
B9J08_003639	0.350273	0.0468473	hypothetical protein
B9J08_005103	0.349655	0.125502	hypothetical protein
B9J08_000466	0.349089	0.0408932	hypothetical protein
B9J08_000868	0.348739	0.061502	hypothetical protein
B9J08_004151	0.348676	0.0485882	hypothetical protein
B9J08_005516	0.348668	0.591956	4-hydroxyphenylpyruvate dioxygenase
B9J08_002147	0.348429	0.0400917	hypothetical protein
B9J08_002214	0.348182	0.0924982	hypothetical protein
B9J08_002204	0.348108	0.0836705	hypothetical protein
B9J08_003216	0.34801	0.0505495	hypothetical protein
B9J08_003226	0.347495	0.13253	hypothetical protein
B9J08_002319	0.34716	0.655443	hypothetical protein
B9J08_001501	0.346814	0.0620924	hypothetical protein
B9J08_002697	0.346782	0.0379434	hypothetical protein
B9J08_000464	0.346711	0.0495388	hypothetical protein
B9J08_005546	0.346241	0.0503174	hypothetical protein
B9J08_000499	0.345916	0.15141	hypothetical protein
B9J08_001808	0.345859	0.0525133	hypothetical protein
B9J08_003180	0.345226	0.0436687	isocitrate dehydrogenase [NADP], mitochondrial
B9J08_003736	0.345125	0.0738422	hypothetical protein
B9J08_000949	0.344806	0.12552	hypothetical protein
B9J08_001323	0.344599	0.0504335	hypothetical protein
B9J08_002636	0.344189	0.027659	hypothetical protein
B9J08_000640	0.343608	0.0898898	hypothetical protein
B9J08_000092	0.343578	0.0296275	hypothetical protein
B9J08_002232	0.343334	0.0670521	iron-sulfur clusters transporter ATM1, mitochondrial
B9J08_004141	0.343303	0.118172	hypothetical protein
B9J08_002859	0.34283	0.0528958	hypothetical protein
B9J08_003781	0.341929	0.118863	hypothetical protein
B9J08_004720	0.341906	0.0630448	hypothetical protein
B9J08_000589	0.341651	0.0962846	hypothetical protein
B9J08_004461	0.341544	0.0318809	prohibitin-2
B9J08_000802	0.34152	0.11612	hypothetical protein
B9J08_001485	0.34147	0.054585	hypothetical protein
B9J08_001225	0.341128	0.0891234	hypothetical protein
B9J08_004216	0.340488	0.0548247	hypothetical protein
B9J08_000116	0.34002	0.650558	hypothetical protein
B9J08_004786	0.339381	0.166438	hypothetical protein
B9J08_002461	0.339326	0.198628	hypothetical protein
B9J08_004300	0.339173	0.0279818	hypothetical protein
B9J08_003069	0.339039	0.0344309	hypothetical protein
B9J08_002939	0.338711	0.0299408	hypothetical protein
B9J08_000986	0.338699	0.184575	hypothetical protein
B9J08_002990	0.338028	0.141648	hypothetical protein
B9J08_001096	0.337753	0.113372	hypothetical protein
B9J08_001791	0.337286	0.0480563	hypothetical protein
B9J08_000646	0.33704	0.0952755	hypothetical protein
B9J08_005262	0.337023	0.0711816	hypothetical protein
B9J08_001909	0.33686	0.0402978	hypothetical protein
B9J08_005227	0.336175	0.100415	hypothetical protein
B9J08_002465	0.335635	0.431209	hypothetical protein
B9J08_000913	0.335567	0.0601953	hypothetical protein
B9J08_002313	0.335166	0.0551681	hypothetical protein
B9J08_005454	0.335149	0.0749151	hypothetical protein
B9J08_003822	0.334933	0.0299742	hypothetical protein
B9J08_001272	0.334903	0.0417165	hypothetical protein
B9J08_001468	0.334341	0.185245	hypothetical protein
B9J08_005381	0.334006	0.0387878	hypothetical protein
B9J08_005494	0.333582	0.305112	hypothetical protein
B9J08_004662	0.333457	0.0437764	hypothetical protein
B9J08_001539	0.333406	0.0745378	hypothetical protein
B9J08_000595	0.333395	0.110335	hypothetical protein
B9J08_005070	0.333308	0.0627431	hypothetical protein
B9J08_000129	0.332149	0.0460399	hypothetical protein
B9J08_004804	0.33155	0.0784809	hypothetical protein
B9J08_000515	0.331435	0.0471123	hypothetical protein
B9J08_003473	0.331394	0.0432672	hypothetical protein
B9J08_001175	0.331392	0.0366643	hypothetical protein
B9J08_001576	0.330907	0.0545054	hypothetical protein
B9J08_004538	0.329475	0.265218	OPT family small oligopeptide transporter
B9J08_004190	0.32903	0.0565235	hypothetical protein
B9J08_003787	0.328947	0.0561423	proteasome subunit beta type-3
B9J08_002028	0.328177	0.0666736	hypothetical protein
B9J08_002616	0.327787	0.0804278	hypothetical protein
B9J08_000322	0.327331	0.255266	hypothetical protein
B9J08_004656	0.326873	0.11966	hypothetical protein
B9J08_000787	0.326392	0.0925758	hypothetical protein
B9J08_002549	0.326299	0.158846	hypothetical protein
B9J08_000301	0.326198	0.0566817	hypothetical protein
B9J08_005506	0.325552	0.148525	hypothetical protein
B9J08_002053	0.325048	0.465595	hypothetical protein
B9J08_001700	0.324686	0.0681212	hypothetical protein
B9J08_005011	0.324682	0.131501	hypothetical protein
B9J08_000145	0.323774	0.0584945	hypothetical protein
B9J08_004933	0.323532	0.0572816	V-type proton ATPase proteolipid subunit 2
B9J08_001273	0.323343	0.0503234	hypothetical protein
B9J08_001619	0.322748	0.0460362	hypothetical protein
B9J08_003673	0.322432	0.0755661	hypothetical protein
B9J08_000895	0.322126	0.0619512	ribulose-phosphate 3-epimerase
B9J08_000493	0.322117	0.123567	hypothetical protein
B9J08_005162	0.321657	0.0817429	hypothetical protein
B9J08_000362	0.321145	0.1592	hypothetical protein
B9J08_004825	0.32054	0.472338	hypothetical protein
B9J08_002603	0.320521	0.171948	hypothetical protein
B9J08_000043	0.320456	0.0564697	hypothetical protein
B9J08_003887	0.320251	0.0451151	hypothetical protein
B9J08_005315	0.320178	0.0807232	hypothetical protein
B9J08_001972	0.319963	0.0453549	hypothetical protein
B9J08_003924	0.319529	0.0617328	hypothetical protein
B9J08_002637	0.319084	0.121599	hypothetical protein
B9J08_002524	0.318998	0.147133	hypothetical protein
B9J08_004286	0.318844	0.0592071	hypothetical protein
B9J08_002388	0.318587	0.520425	hypothetical protein
B9J08_003106	0.318477	0.103306	hypothetical protein
B9J08_000803	0.318308	0.103801	hypothetical protein
B9J08_002589	0.317127	0.114116	hypothetical protein
B9J08_001970	0.316859	0.0726938	hypothetical protein
B9J08_004066	0.316679	0.456156	OPT family small oligopeptide transporter
B9J08_000039	0.316512	0.104854	hypothetical protein
B9J08_004455	0.316398	0.155632	hypothetical protein
B9J08_004675	0.316001	0.0715234	hypothetical protein
B9J08_001890	0.315908	0.0495423	serine/threonine-protein phosphatase PP2A-2 catalytic subunit
B9J08_003001	0.315768	0.0511525	hypothetical protein
B9J08_003233	0.315449	0.0704711	hypothetical protein
B9J08_001734	0.314962	0.0682279	hypothetical protein
B9J08_005118	0.314854	0.820775	hypothetical protein
B9J08_003445	0.314774	0.144449	hypothetical protein
B9J08_000854	0.314554	0.0979726	hypothetical protein
B9J08_003521	0.314413	0.0564081	hypothetical protein
B9J08_003007	0.314056	0.0917268	hypothetical protein
B9J08_001652	0.314021	0.0527742	Fe-S protein assembly co-chaperone HscB
B9J08_000315	0.313972	0.0690533	hypothetical protein
B9J08_002878	0.313862	0.183526	hypothetical protein
B9J08_002043	0.313182	0.0519488	pentafunctional AROM polypeptide
B9J08_002571	0.313024	0.0532259	hypothetical protein
B9J08_005177	0.312959	0.0885088	hypothetical protein
B9J08_002763	0.312931	0.117772	hypothetical protein
B9J08_003970	0.312769	0.129346	hypothetical protein
B9J08_003969	0.312069	0.102541	hypothetical protein
B9J08_002502	0.311551	0.0962362	ubiquitin-conjugating enzyme variant MMS2
B9J08_000303	0.310976	0.0808712	hypothetical protein
B9J08_004879	0.310966	0.0682471	hypothetical protein
B9J08_002325	0.310603	0.0540355	hypothetical protein
B9J08_004976	0.31054	0.148438	hypothetical protein
B9J08_005191	0.309657	0.122201	hypothetical protein
B9J08_002052	0.309294	0.224889	hypothetical protein
B9J08_003218	0.309289	0.0663474	hypothetical protein
B9J08_003541	0.308278	0.273825	5'/3'-nucleotidase SurE
B9J08_003151	0.308241	0.0985052	hypothetical protein
B9J08_004368	0.307389	0.0755884	hypothetical protein
B9J08_000860	0.30709	0.0566849	hypothetical protein
B9J08_000480	0.30695	0.0625029	cell division control protein 48
B9J08_004148	0.306864	0.0977235	hypothetical protein
B9J08_000397	0.30647	0.0932275	hypothetical protein
B9J08_004763	0.306272	0.147541	hypothetical protein
B9J08_001858	0.305788	0.121833	hypothetical protein
B9J08_000967	0.305722	0.0880632	hypothetical protein
B9J08_000631	0.305538	0.0519863	hypothetical protein
B9J08_001103	0.305473	0.108535	hypothetical protein
B9J08_004240	0.305008	0.0916637	hypothetical protein
B9J08_002133	0.304832	0.0836171	hypothetical protein
B9J08_000138	0.304304	0.0720606	hypothetical protein
B9J08_004371	0.304202	0.10086	hypothetical protein
B9J08_003526	0.30404	0.117355	hypothetical protein
B9J08_000718	0.303827	0.0678815	hypothetical protein
B9J08_003412	0.3038	0.0685509	hypothetical protein
B9J08_004328	0.303463	0.138887	hypothetical protein
B9J08_002911	0.303441	0.0617412	hypothetical protein
B9J08_005402	0.303324	0.10132	hypothetical protein
B9J08_000143	0.302714	0.0981027	hypothetical protein
B9J08_000005	0.302318	0.303755	hypothetical protein
B9J08_004755	0.302306	0.698932	hypothetical protein
B9J08_003810	0.302294	0.148804	hypothetical protein
B9J08_001210	0.302077	0.0842043	hypothetical protein
B9J08_002199	0.30185	0.0679006	hypothetical protein
B9J08_001481	0.301578	0.0927072	hypothetical protein
B9J08_000259	0.300961	0.125179	hypothetical protein
B9J08_000657	0.300436	0.0926493	hypothetical protein
B9J08_000988	0.300425	0.107307	hypothetical protein
B9J08_004445	0.300252	0.0729203	hypothetical protein
B9J08_000094	0.300066	0.168186	hypothetical protein
B9J08_003987	0.300042	0.0585437	hypothetical protein
B9J08_002891	0.29929	0.234249	hypothetical protein
B9J08_000018	0.29924	0.107294	hypothetical protein
B9J08_002132	0.299199	0.106754	hypothetical protein
B9J08_004478	0.298648	0.156251	hypothetical protein
B9J08_001585	0.298619	0.0662282	hypothetical protein
B9J08_004789	0.298125	0.134006	hypothetical protein
B9J08_001780	0.29769	0.121119	hypothetical protein
B9J08_002766	0.297442	0.0697683	hypothetical protein
B9J08_000702	0.296952	0.163635	hypothetical protein
B9J08_002728	0.296927	0.0925901	hypothetical protein
B9J08_001632	0.29644	0.069709	hypothetical protein
B9J08_001955	0.296217	0.115035	hypothetical protein
B9J08_003173	0.295351	0.106433	hypothetical protein
B9J08_003709	0.295142	0.197305	hypothetical protein
B9J08_003178	0.294996	0.068705	hypothetical protein
B9J08_002292	0.294745	0.205207	hypothetical protein
B9J08_004432	0.294373	0.0730566	hypothetical protein
B9J08_000522	0.294339	0.0787138	serine-tRNA ligase
B9J08_005052	0.294215	0.206451	hypothetical protein
B9J08_004593	0.294166	0.119477	sodium/hydrogen exchanger 3
B9J08_001554	0.294055	0.122686	hypothetical protein
B9J08_003510	0.293941	0.101381	pyrroline-5-carboxylate reductase
B9J08_002680	0.293577	0.0888629	hypothetical protein
B9J08_001823	0.293367	0.111092	hypothetical protein
B9J08_003394	0.293331	0.143351	hypothetical protein
B9J08_001654	0.293234	0.0902926	hypothetical protein
B9J08_001236	0.29321	0.0822589	hypothetical protein
B9J08_002835	0.292841	0.134084	hypothetical protein
B9J08_004707	0.292791	0.0936612	hypothetical protein
B9J08_000497	0.292662	0.0818521	hypothetical protein
B9J08_001158	0.292603	0.0914128	hypothetical protein
B9J08_005112	0.29091	0.26037	ribonucleoside-diphosphate reductase, alpha subunit
B9J08_005203	0.290167	0.15882	hypothetical protein
B9J08_001172	0.289806	0.06784	hypothetical protein
B9J08_002676	0.289352	0.13921	hypothetical protein
B9J08_002281	0.289239	0.0684761	hypothetical protein
B9J08_003576	0.289031	0.0791882	hypothetical protein
B9J08_000755	0.288756	0.190583	hypothetical protein
B9J08_001268	0.288657	0.406175	hypothetical protein
B9J08_001540	0.288656	0.167038	dihydrodipicolinate synthase
B9J08_004176	0.288319	0.406712	hypothetical protein
B9J08_004681	0.288294	0.18706	hypothetical protein
B9J08_000730	0.287939	0.100834	hypothetical protein
B9J08_003305	0.287863	0.0987875	hypothetical protein
B9J08_004484	0.287705	0.16229	hypothetical protein
B9J08_000525	0.287615	0.103611	hypothetical protein
B9J08_003913	0.287507	0.172414	hypothetical protein
B9J08_005248	0.287478	0.117011	di-trans,poly-cis-decaprenylcistransferase
B9J08_002671	0.287406	0.130984	hypothetical protein
B9J08_000349	0.287177	0.0735906	hypothetical protein
B9J08_005114	0.287081	0.187746	hypothetical protein
B9J08_003254	0.286991	0.228878	hypothetical protein
B9J08_003335	0.286549	0.209829	hypothetical protein
B9J08_000765	0.285174	0.0770878	hypothetical protein
B9J08_000753	0.284577	0.132229	hypothetical protein
B9J08_004458	0.284114	0.0934037	hypothetical protein
B9J08_001432	0.283771	0.0796835	fimbrin
B9J08_005384	0.283104	0.104801	hypothetical protein
B9J08_001332	0.282959	0.228871	hypothetical protein
B9J08_000006	0.282924	0.260461	hypothetical protein
B9J08_001906	0.282709	0.154523	hypothetical protein
B9J08_004457	0.282362	0.120047	nuclear transcription factor Y subunit B-3
B9J08_002887	0.281725	0.138356	hypothetical protein
B9J08_003066	0.280565	0.152351	hypothetical protein
B9J08_000950	0.280429	0.124384	hypothetical protein
B9J08_000172	0.280392	0.193271	hypothetical protein
B9J08_004001	0.280172	0.104361	hypothetical protein
B9J08_001710	0.279938	0.108677	hypothetical protein
B9J08_000276	0.279753	0.155638	chaperone DnaK
B9J08_001586	0.279728	0.127911	hypothetical protein
B9J08_004603	0.279498	0.248831	hypothetical protein
B9J08_003710	0.279408	0.126477	hypothetical protein
B9J08_001211	0.279089	0.0742348	hypothetical protein
B9J08_004667	0.278993	0.385017	hypothetical protein
B9J08_001260	0.278819	0.143978	hypothetical protein
B9J08_000994	0.278703	0.107907	hypothetical protein
B9J08_004373	0.278677	0.166629	hypothetical protein
B9J08_004201	0.278664	0.0779164	hypothetical protein
B9J08_003644	0.278644	0.209058	hypothetical protein
B9J08_000040	0.278418	0.104042	hypothetical protein
B9J08_003773	0.277865	0.147409	hypothetical protein
B9J08_005192	0.277759	0.133504	hypothetical protein
B9J08_004260	0.277426	0.148809	hypothetical protein
B9J08_004599	0.277215	0.1993	hypothetical protein
B9J08_005184	0.275885	0.119839	hypothetical protein
B9J08_001980	0.275433	0.125608	hypothetical protein
B9J08_004208	0.275337	0.236166	hypothetical protein
B9J08_002525	0.274652	0.07941	hypothetical protein
B9J08_001340	0.274475	0.0838411	reduced viability upon starvation protein 161
B9J08_002144	0.273625	0.100894	hypothetical protein
B9J08_004678	0.273295	0.245595	hypothetical protein
B9J08_001617	0.273104	0.152561	hypothetical protein
B9J08_002656	0.272675	0.114856	hypothetical protein
B9J08_004133	0.272419	0.0769881	hypothetical protein
B9J08_002157	0.272306	0.137702	hypothetical protein
B9J08_003352	0.272303	0.164946	hypothetical protein
B9J08_003315	0.272267	0.10405	hypothetical protein
B9J08_001503	0.272234	0.0955493	uroporphyrinogen decarboxylase
B9J08_002756	0.272188	0.17513	hypothetical protein
B9J08_003939	0.272159	0.0987274	hypothetical protein
B9J08_003642	0.272058	0.17798	hypothetical protein
B9J08_000587	0.271449	0.199637	hypothetical protein
B9J08_001954	0.271418	0.123628	hypothetical protein
B9J08_004310	0.271149	0.0976163	hypothetical protein
B9J08_005357	0.270966	0.12523	hypothetical protein
B9J08_000935	0.270952	0.164765	hypothetical protein
B9J08_000243	0.270788	0.167231	hypothetical protein
B9J08_002179	0.270721	0.139434	hypothetical protein
B9J08_005027	0.270719	0.143674	hypothetical protein
B9J08_005136	0.27071	0.101132	hypothetical protein
B9J08_005026	0.270177	0.134161	hypothetical protein
B9J08_002018	0.269612	0.106994	thioredoxin
B9J08_003839	0.269227	0.173659	hypothetical protein
B9J08_000872	0.268121	0.107402	hypothetical protein
B9J08_000559	0.267994	0.215804	S-formylglutathione hydrolase
B9J08_001137	0.267587	0.119853	hypothetical protein
B9J08_005037	0.267412	0.253541	hypothetical protein
B9J08_000169	0.267405	0.213407	hypothetical protein
B9J08_001842	0.266931	0.114734	26S protease subunit RPT4
B9J08_002863	0.26661	0.170513	hypothetical protein
B9J08_004294	0.266539	0.179734	hypothetical protein
B9J08_000299	0.265853	0.218515	hypothetical protein
B9J08_002470	0.265696	0.127422	hypothetical protein
B9J08_002592	0.265677	0.186895	hypothetical protein
B9J08_004960	0.265625	0.602058	hypothetical protein
B9J08_000919	0.265445	0.211068	hypothetical protein
B9J08_004779	0.265214	0.516719	hypothetical protein
B9J08_001215	0.264875	0.140018	hypothetical protein
B9J08_004665	0.264547	0.142628	hypothetical protein
B9J08_003350	0.264495	0.132474	hypothetical protein
B9J08_001907	0.263916	0.275346	hypothetical protein
B9J08_004622	0.263686	0.194563	hypothetical protein
B9J08_003336	0.263313	0.247066	hypothetical protein
B9J08_003666	0.263311	0.249252	hypothetical protein
B9J08_002181	0.262935	0.128834	hypothetical protein
B9J08_000889	0.26263	0.114828	hypothetical protein
B9J08_002674	0.262375	0.231595	hypothetical protein
B9J08_004388	0.261958	0.131908	hypothetical protein
B9J08_001924	0.261752	0.114612	hypothetical protein
B9J08_001779	0.261171	0.112028	hypothetical protein
B9J08_004064	0.261107	0.707466	hypothetical protein
B9J08_000813	0.26092	0.106961	trimethyllysine dioxygenase
B9J08_002672	0.260084	0.122654	hypothetical protein
B9J08_004708	0.259199	0.109143	hypothetical protein
B9J08_004780	0.259151	0.138696	hypothetical protein
B9J08_005167	0.25908	0.155871	hypothetical protein
B9J08_003714	0.258951	0.146327	hypothetical protein
B9J08_003705	0.258945	0.113948	hypothetical protein
B9J08_004793	0.258899	0.235995	hypothetical protein
B9J08_000725	0.258841	0.102459	hypothetical protein
B9J08_005094	0.258787	0.208783	hypothetical protein
B9J08_002188	0.258657	0.14125	hypothetical protein
B9J08_000427	0.258544	0.234494	hypothetical protein
B9J08_002402	0.25816	0.192406	hypothetical protein
B9J08_000334	0.258089	0.184473	hypothetical protein
B9J08_002360	0.258068	0.166329	protein disulfide-isomerase domain
B9J08_002303	0.257803	0.338591	protein ARG5,6, mitochondrial
B9J08_003934	0.257731	0.151869	hypothetical protein
B9J08_000761	0.257543	0.212701	hypothetical protein
B9J08_003184	0.257443	0.132533	hypothetical protein
B9J08_002825	0.257433	0.542735	hypothetical protein
B9J08_001436	0.257351	0.159395	hypothetical protein
B9J08_001417	0.2573	0.189472	hypothetical protein
B9J08_001138	0.257179	0.109763	hypothetical protein
B9J08_004605	0.257074	0.216801	septin CDC11
B9J08_004824	0.257055	0.185949	hypothetical protein
B9J08_002522	0.256748	0.106401	hypothetical protein
B9J08_004043	0.256645	0.118319	hypothetical protein
B9J08_001620	0.256493	0.150819	hypothetical protein
B9J08_002125	0.256469	0.115927	hypothetical protein
B9J08_001198	0.256427	0.276106	hypothetical protein
B9J08_000794	0.256394	0.14346	hypothetical protein
B9J08_000680	0.255912	0.126097	hypothetical protein
B9J08_002817	0.255726	0.211475	hypothetical protein
B9J08_003102	0.255453	0.220527	hypothetical protein
B9J08_003489	0.254629	0.111739	hypothetical protein
B9J08_003016	0.25445	0.320174	hypothetical protein
B9J08_001242	0.254219	0.244421	hypothetical protein
B9J08_002328	0.253975	0.127875	hypothetical protein
B9J08_005259	0.253705	0.189056	ubiquitin-like protein SMT3
B9J08_001446	0.253209	0.112781	hypothetical protein
B9J08_001447	0.253099	0.273304	homoserine kinase
B9J08_005034	0.252843	0.117657	hypothetical protein
B9J08_000251	0.252803	0.143101	hypothetical protein
B9J08_003790	0.252329	0.139886	hypothetical protein
B9J08_005376	0.252274	0.143303	DNA repair protein rad18
B9J08_004440	0.252163	0.254084	hypothetical protein
B9J08_004302	0.252156	0.286856	hypothetical protein
B9J08_002058	0.251384	0.185561	hypothetical protein
B9J08_001701	0.251213	0.12246	V-type proton ATPase subunit B
B9J08_003272	0.250794	0.311868	hypothetical protein
B9J08_005504	0.250773	0.191059	hypothetical protein
B9J08_004955	0.250357	0.163338	septum-promoting GTP-binding protein 1
B9J08_002203	0.250207	0.113459	hypothetical protein
B9J08_005367	0.250187	0.151091	hypothetical protein
B9J08_003140	0.250001	0.151283	hypothetical protein
B9J08_000970	0.249932	0.188407	hypothetical protein
B9J08_002300	0.249583	0.314626	hypothetical protein
B9J08_003583	0.249064	0.164481	hypothetical protein
B9J08_002268	0.248795	0.131278	hypothetical protein
B9J08_002736	0.248615	0.17438	hypothetical protein
B9J08_001445	0.248273	0.136635	hypothetical protein
B9J08_002747	0.248038	0.35168	hypothetical protein
B9J08_003490	0.247715	0.213386	signal peptidase complex catalytic subunit SEC11
B9J08_002722	0.247584	0.134903	hypothetical protein
B9J08_003854	0.247448	0.179654	hypothetical protein
B9J08_002174	0.247139	0.138948	hypothetical protein
B9J08_002438	0.246867	0.193667	hypothetical protein
B9J08_004357	0.246722	0.159335	Cys-Gly metallodipeptidase DUG1
B9J08_005329	0.245932	0.17931	hypothetical protein
B9J08_000131	0.245685	0.175517	hypothetical protein
B9J08_002488	0.245522	0.142583	hypothetical protein
B9J08_003027	0.245335	0.188677	hypothetical protein
B9J08_001192	0.245154	0.116748	hypothetical protein
B9J08_000195	0.245007	0.250164	hypothetical protein
B9J08_000578	0.244845	0.168584	hypothetical protein
B9J08_000186	0.244843	0.146467	ribose-5-phosphate isomerase
B9J08_000474	0.243945	0.119937	hypothetical protein
B9J08_002129	0.243773	0.162947	hypothetical protein
B9J08_000924	0.243636	0.249317	hypothetical protein
B9J08_005021	0.243571	0.132082	hypothetical protein
B9J08_002575	0.243564	0.277456	hypothetical protein
B9J08_002158	0.243559	0.166706	hypothetical protein
B9J08_004677	0.243239	0.53454	hypothetical protein
B9J08_000016	0.243109	0.248064	hypothetical protein
B9J08_003805	0.242969	0.165319	hypothetical protein
B9J08_004913	0.241588	0.179031	hypothetical protein
B9J08_000748	0.241439	0.140381	hypothetical protein
B9J08_002151	0.241383	0.132087	hypothetical protein
B9J08_003829	0.241138	0.283522	hypothetical protein
B9J08_001177	0.240493	0.187832	hypothetical protein
B9J08_002641	0.240398	0.207649	hypothetical protein
B9J08_005058	0.239833	0.180186	hypothetical protein
B9J08_005148	0.23965	0.304665	hypothetical protein
B9J08_002167	0.239402	0.14055	hypothetical protein
B9J08_001196	0.239271	0.394687	hypothetical protein
B9J08_005496	0.239217	0.166481	hypothetical protein
B9J08_005489	0.238883	0.145129	hypothetical protein
B9J08_001017	0.238858	0.636502	hypothetical protein
B9J08_005067	0.238225	0.214341	hydroxyisourate hydrolase
B9J08_003848	0.238094	0.151054	hypothetical protein
B9J08_005204	0.237966	0.186527	hypothetical protein
B9J08_005105	0.237813	0.354137	hypothetical protein
B9J08_002206	0.237325	0.160751	hypothetical protein
B9J08_004401	0.237204	0.127506	hypothetical protein
B9J08_001615	0.23699	0.29439	hypothetical protein
B9J08_000557	0.236069	0.723742	hypothetical protein
B9J08_003458	0.2358	0.223579	hypothetical protein
B9J08_002962	0.235519	0.192415	hypothetical protein
B9J08_002953	0.235148	0.182047	hypothetical protein
B9J08_004178	0.234939	0.215518	hypothetical protein
B9J08_004036	0.234662	0.641035	hypothetical protein
B9J08_001865	0.234523	0.241856	hypothetical protein
B9J08_005095	0.234139	0.2518	hypothetical protein
B9J08_005147	0.234113	0.741567	hypothetical protein
B9J08_002161	0.233127	0.270451	hypothetical protein
B9J08_004834	0.232995	0.1877	cell division control protein 10
B9J08_000576	0.232983	0.183324	hypothetical protein
B9J08_001435	0.232974	0.277354	hypothetical protein
B9J08_003113	0.232938	0.223363	hypothetical protein
B9J08_002370	0.232938	0.270246	hypothetical protein
B9J08_000268	0.232917	0.191023	hypothetical protein
B9J08_004460	0.232114	0.189398	hypothetical protein
B9J08_000756	0.232087	0.422843	hypothetical protein
B9J08_000850	0.231779	0.269263	hypothetical protein
B9J08_004165	0.23157	0.249898	hypothetical protein
B9J08_003144	0.230661	0.373902	hypothetical protein
B9J08_004591	0.23065	0.410119	mitochondrial DNA replication protein YHM2
B9J08_005306	0.230494	0.263108	hypothetical protein
B9J08_000101	0.230426	0.470567	hypothetical protein
B9J08_004489	0.229554	0.178273	hypothetical protein
B9J08_003210	0.229262	0.290098	hypothetical protein
B9J08_000350	0.229034	0.234315	hypothetical protein
B9J08_004505	0.228782	0.259972	hypothetical protein
B9J08_005497	0.228219	0.391613	hypothetical protein
B9J08_003260	0.228056	0.247972	hypothetical protein
B9J08_002267	0.22804	0.300801	hypothetical protein
B9J08_000920	0.227766	0.177996	hypothetical protein
B9J08_002588	0.227581	0.412976	hypothetical protein
B9J08_000865	0.227443	0.192484	hypothetical protein
B9J08_005124	0.22696	0.59168	hypothetical protein
B9J08_002107	0.226419	0.163999	hypothetical protein
B9J08_004364	0.226205	0.193046	hypothetical protein
B9J08_000340	0.225997	0.238882	hypothetical protein
B9J08_002023	0.22593	0.194268	hypothetical protein
B9J08_004303	0.225846	0.296894	hypothetical protein
B9J08_000482	0.225628	0.17456	hypothetical protein
B9J08_002015	0.225613	0.203986	hypothetical protein
B9J08_004690	0.225382	0.269966	hypothetical protein
B9J08_002560	0.225098	0.416019	hypothetical protein
B9J08_005043	0.224777	0.246088	hypothetical protein
B9J08_003811	0.224477	0.228526	hypothetical protein
B9J08_000181	0.224212	0.168962	hypothetical protein
B9J08_004498	0.223648	0.316348	hypothetical protein
B9J08_002175	0.223575	0.240053	hypothetical protein
B9J08_002324	0.223571	0.223807	hypothetical protein
B9J08_001099	0.22329	0.176872	protein transporter SEC13
B9J08_003427	0.223267	0.198565	hypothetical protein
B9J08_001943	0.223098	0.157721	hypothetical protein
B9J08_003478	0.222983	0.188368	hypothetical protein
B9J08_000044	0.222781	0.161201	hypothetical protein
B9J08_002750	0.222348	0.159928	hypothetical protein
B9J08_002098	0.222153	0.211146	hypothetical protein
B9J08_000901	0.221934	0.360819	hypothetical protein
B9J08_000681	0.221297	0.237067	hypothetical protein
B9J08_002276	0.221074	0.183609	ADP-ribosylation factor 1
B9J08_001553	0.221066	0.192365	hypothetical protein
B9J08_005104	0.220165	0.198323	hypothetical protein
B9J08_002089	0.220059	0.174759	hypothetical protein
B9J08_002183	0.219451	0.208637	hypothetical protein
B9J08_001182	0.219298	0.47307	hypothetical protein
B9J08_005074	0.219275	0.315369	hypothetical protein
B9J08_000840	0.21909	0.23353	hypothetical protein
B9J08_002561	0.219084	0.224476	hypothetical protein
B9J08_002662	0.219066	0.408337	hypothetical protein
B9J08_002432	0.218952	0.240802	hypothetical protein
B9J08_000459	0.218764	0.252648	hypothetical protein
B9J08_002308	0.218687	0.186087	hypothetical protein
B9J08_001676	0.218354	0.192347	hypothetical protein
B9J08_003537	0.217999	0.205006	hypothetical protein
B9J08_002832	0.217549	0.17354	hypothetical protein
B9J08_001318	0.217096	0.354039	hypothetical protein
B9J08_004012	0.216421	0.326854	hypothetical protein
B9J08_005507	0.216353	0.170658	hypothetical protein
B9J08_004183	0.216351	0.576652	hypothetical protein
B9J08_002182	0.216223	0.162099	hypothetical protein
B9J08_002849	0.216209	0.207945	hypothetical protein
B9J08_002978	0.216206	0.18482	hypothetical protein
B9J08_003782	0.215947	0.183531	hypothetical protein
B9J08_000784	0.215479	0.483023	hypothetical protein
B9J08_000343	0.215158	0.231135	hypothetical protein
B9J08_000524	0.214878	0.203312	hypothetical protein
B9J08_001799	0.214607	0.474862	hypothetical protein
B9J08_000710	0.214492	0.420788	hypothetical protein
B9J08_002396	0.21418	0.309941	hypothetical protein
B9J08_001237	0.213978	0.244718	hypothetical protein
B9J08_003540	0.213964	0.338415	hypothetical protein
B9J08_001349	0.213531	0.199053	hypothetical protein
B9J08_002970	0.213151	0.371414	multiprotein-bridging factor 1
B9J08_004734	0.21286	0.195428	hypothetical protein
B9J08_000437	0.212347	0.301508	ubiquitin-conjugating enzyme E2 13
B9J08_003864	0.212321	0.219904	hypothetical protein
B9J08_005138	0.212201	0.263699	mitochondrial outer membrane protein porin
B9J08_001305	0.211795	0.258496	hypothetical protein
B9J08_000130	0.211768	0.325809	hypothetical protein
B9J08_003009	0.211535	0.19117	hypothetical protein
B9J08_000339	0.210825	0.215873	hypothetical protein
B9J08_000793	0.210749	0.227263	hypothetical protein
B9J08_001082	0.210741	0.189164	hypothetical protein
B9J08_000918	0.210309	0.623178	hypothetical protein
B9J08_002444	0.209732	0.291688	hypothetical protein
B9J08_005229	0.209521	0.208693	hypothetical protein
B9J08_001095	0.208957	0.360778	tryptophan-tRNA ligase
B9J08_002460	0.208573	0.538731	hypothetical protein
B9J08_003793	0.207916	0.425283	hypothetical protein
B9J08_001294	0.207198	0.451315	hypothetical protein
B9J08_001683	0.206566	0.332476	hypothetical protein
B9J08_000945	0.206437	0.269785	hypothetical protein
B9J08_002164	0.206396	0.323429	hypothetical protein
B9J08_003505	0.206392	0.247831	hypothetical protein
B9J08_002155	0.206349	0.198556	hypothetical protein
B9J08_000283	0.206244	0.274887	secondary thiamine-phosphate synthase enzyme
B9J08_001482	0.206179	0.612738	hypothetical protein
B9J08_002139	0.206131	0.384577	hypothetical protein
B9J08_003244	0.205795	0.2665	hypothetical protein
B9J08_002411	0.205723	0.228315	hypothetical protein
B9J08_000630	0.205693	0.305616	hypothetical protein
B9J08_004304	0.205238	0.361739	hypothetical protein
B9J08_004712	0.205032	0.220303	hypothetical protein
B9J08_000309	0.204907	0.197771	hypothetical protein
B9J08_004549	0.204684	0.260083	hypothetical protein
B9J08_004479	0.204597	0.28649	OPT family small oligopeptide transporter
B9J08_001185	0.204526	0.334684	hypothetical protein
B9J08_002022	0.204506	0.464881	hypothetical protein
B9J08_005512	0.204295	0.252117	hypothetical protein
B9J08_003869	0.203693	0.255732	hypothetical protein
B9J08_000985	0.203209	0.323632	hypothetical protein
B9J08_001381	0.203207	0.370706	superoxide dismutase [Cu-Zn] 1
B9J08_000831	0.203064	0.277636	hypothetical protein
B9J08_001150	0.202356	0.279047	V-type ATPase, G subunit
B9J08_003434	0.201331	0.261976	hypothetical protein
B9J08_001850	0.201112	0.188366	bifunctional purine biosynthesis protein ADE17
B9J08_002114	0.200944	0.234919	hypothetical protein
B9J08_000966	0.200761	0.25963	hypothetical protein
B9J08_005209	0.20048	0.215517	hypothetical protein
B9J08_000627	0.200381	0.263892	hypothetical protein
B9J08_003543	0.200117	0.273613	hypothetical protein
B9J08_000609	0.200058	0.352712	hypothetical protein
B9J08_002996	0.199936	0.311873	hypothetical protein
B9J08_000153	0.199612	0.368469	hypothetical protein
B9J08_002909	0.199	0.235777	hypothetical protein
B9J08_000236	0.198615	0.560067	hypothetical protein
B9J08_001994	0.197921	0.247359	hypothetical protein
B9J08_005278	0.197876	0.462878	hypothetical protein
B9J08_001151	0.197498	0.300072	hypothetical protein
B9J08_000271	0.197159	0.268417	hypothetical protein
B9J08_000566	0.197098	0.24336	hypothetical protein
B9J08_004540	0.197019	0.239529	hypothetical protein
B9J08_002426	0.196879	0.248361	hypothetical protein
B9J08_005412	0.196865	0.232063	hypothetical protein
B9J08_004853	0.196777	0.295829	hypothetical protein
B9J08_003884	0.19644	0.418509	hypothetical protein
B9J08_000300	0.196433	0.332652	hypothetical protein
B9J08_003978	0.196309	0.709135	tRNA-Arg
B9J08_002362	0.196229	0.27364	hypothetical protein
B9J08_004267	0.196006	0.234737	hypothetical protein
B9J08_001665	0.195862	0.549413	hypothetical protein
B9J08_004567	0.195475	0.355148	hypothetical protein
B9J08_002989	0.195292	0.277515	hypothetical protein
B9J08_002550	0.195063	0.263998	hypothetical protein
B9J08_000957	0.194897	0.223636	hypothetical protein
B9J08_001228	0.194638	0.27633	hypothetical protein
B9J08_000509	0.194542	0.407074	hypothetical protein
B9J08_003255	0.193996	0.240855	hypothetical protein
B9J08_002269	0.193902	0.251858	hypothetical protein
B9J08_000241	0.193706	0.294401	hypothetical protein
B9J08_002334	0.192815	0.444591	hypothetical protein
B9J08_001408	0.191466	0.231934	hypothetical protein
B9J08_002186	0.191418	0.290674	hypothetical protein
B9J08_003396	0.191364	0.254668	hypothetical protein
B9J08_001815	0.190728	0.381544	hypothetical protein
B9J08_001776	0.190344	0.257128	vacuolar transporter chaperone 1
B9J08_004777	0.190335	0.853557	hypothetical protein
B9J08_000141	0.189958	0.245451	protein phosphatase PP2A regulatory subunit B
B9J08_005304	0.189956	0.265063	hypothetical protein
B9J08_002857	0.189773	0.297644	hypothetical protein
B9J08_002257	0.189703	0.447905	hypothetical protein
B9J08_001230	0.188831	0.228793	hypothetical protein
[truncated: 3,587 more rows]
[truncated: 1 more columns]

## Sheet: C. auris 60 min
Gene ID	log2FC	pvalue	product
B9J08_000001	0.949922	0.000122279	hypothetical protein
B9J08_000002	0.878665	0.0107288	hypothetical protein
B9J08_000003	0.0528117	0.640703	hypothetical protein
B9J08_000004	0.24806	0.0170867	hypothetical protein
B9J08_000005	-0.100102	0.534729	hypothetical protein
B9J08_000006	-0.740389	4.35e-32	hypothetical protein
B9J08_000007	0.256393	2.79e-05	hypothetical protein
B9J08_000008	0.468016	0.000211761	hypothetical protein
B9J08_000009	-0.575344	1.27e-19	hypothetical protein
B9J08_000010	-0.493364	2.74e-25	hypothetical protein
B9J08_000011	0.105529	0.0839866	hypothetical protein
B9J08_000012	-0.357559	6.66e-05	ribose-phosphate pyrophosphokinase 4
B9J08_000013	0.126452	0.0295186	dihydroxy-acid dehydratase, mitochondrial
B9J08_000014	0.368826	8.9e-12	hypothetical protein
B9J08_000015	-0.369169	3.16e-12	homocitrate synthase, mitochondrial
B9J08_000016	-0.145822	0.0120796	hypothetical protein
B9J08_000017	0.12771	0.103295	hypothetical protein
B9J08_000018	-0.221775	6.94e-05	hypothetical protein
B9J08_000019	-0.806718	9.55e-58	hypothetical protein
B9J08_000020	-0.928295	8.74e-92	ATP synthase subunit alpha, mitochondrial
B9J08_000021	0.181092	0.00574099	hypothetical protein
B9J08_000022	0.248994	0.00160056	hypothetical protein
B9J08_000023	0.442865	1.87e-16	aminopeptidase 2
B9J08_000024	0.670222	3.65e-15	hypothetical protein
B9J08_000025	0.226448	3.63e-05	hypothetical protein
B9J08_000026	-0.301068	6.84e-07	hypothetical protein
B9J08_000027	0.372099	5.03e-11	hypothetical protein
B9J08_000028	0.190827	0.000390475	hypothetical protein
B9J08_000029	0.668416	4.09e-28	hypothetical protein
B9J08_000030	1.19893	1.13e-109	hypothetical protein
B9J08_000031	-0.0954295	0.054176	hypothetical protein
B9J08_000032	0.0873136	0.0953722	hypothetical protein
B9J08_000033	0.18507	0.0337889	hypothetical protein
B9J08_000034	-1.20787	5.32e-21	hypothetical protein
B9J08_000035	0.875573	0.000310232	hypothetical protein
B9J08_000036	0.589651	0.00282598	hypothetical protein
B9J08_000037	-0.685643	4.42e-34	hypothetical protein
B9J08_000038	-0.907628	2.51e-29	ribosomal protein L33
B9J08_000039	0.172748	0.00115123	hypothetical protein
B9J08_000040	0.255457	0.00185794	hypothetical protein
B9J08_000041	0.0812649	0.57023	hypothetical protein
B9J08_000042	0.100691	0.369603	hypothetical protein
B9J08_000043	0.0557532	0.375907	hypothetical protein
B9J08_000044	-0.134738	0.0159122	hypothetical protein
B9J08_000045	-0.0179241	0.746711	ISWI chromatin-remodeling complex ATPase ISW2
B9J08_000046	0.0609974	0.319764	uracil-DNA glycosylase
B9J08_000047	0.0591564	0.335962	hypothetical protein
B9J08_000048	-0.0272727	0.71048	hypothetical protein
B9J08_000049	-0.0829099	0.0940812	hypothetical protein
B9J08_000050	0.823948	0.112211	hypothetical protein
B9J08_000051	-0.413297	4.28e-07	mitochondrial genome maintenance protein MGM101
B9J08_000052	-0.444528	2.92e-17	hypothetical protein
B9J08_000053	-0.835998	4.53e-54	hypothetical protein
B9J08_000054	0.0872848	0.173166	hypothetical protein
B9J08_000055	0.376891	2.77e-13	hypothetical protein
B9J08_000056	0.0171213	0.786533	hypothetical protein
B9J08_000057	0.165243	0.0141813	pyridoxal 5'-phosphate synthase, glutaminase subunit Pdx2
B9J08_000058	0.229096	2.26e-05	pyridoxine biosynthesis protein SNZ1
B9J08_000059	-0.230018	3.5e-05	hypothetical protein
B9J08_000060	0.357582	1.04e-12	hypothetical protein
B9J08_000061	0.423863	1.49e-05	hypothetical protein
B9J08_000062	0.110795	0.0862192	hypothetical protein
B9J08_000063	-0.108047	0.0288207	proteasome subunit beta type-5
B9J08_000064	-0.717774	1.18e-55	60S ribosomal protein L11-A
B9J08_000065	0.062238	0.405784	hypothetical protein
B9J08_000066	-0.0162076	0.867459	hypothetical protein
B9J08_000067	0.235331	6.28e-05	hypothetical protein
B9J08_000068	0.123255	0.244361	hypothetical protein
B9J08_000069	-0.345161	0.000223853	hypothetical protein
B9J08_000070	-0.109315	0.0827347	hypothetical protein
B9J08_000071	0.697242	9.57e-50	sphingolipid long chain base-responsive protein PIL1
B9J08_000072	-0.168247	0.0297841	hypothetical protein
B9J08_000073	0.203292	0.0990238	hypothetical protein
B9J08_000074	-0.0217608	0.663381	hypothetical protein
B9J08_000075	-0.974067	1.79e-56	inosine-5'-monophosphate dehydrogenase
B9J08_000076	0.350877	0.000466191	hypothetical protein
B9J08_000077	-0.107454	0.261253	hypothetical protein
B9J08_000078	-0.299882	8.5e-06	hypothetical protein
B9J08_000079	0.113997	0.935731	hypothetical protein
B9J08_000080	-0.400554	5.23e-13	hypothetical protein
B9J08_000081	0.0885944	0.103277	hypothetical protein
B9J08_000082	-0.343657	3.74e-14	GTP-binding nuclear protein GSP1/Ran
B9J08_000083	-0.108	0.314305	hypothetical protein
B9J08_000084	-0.292322	2.03e-07	hypothetical protein
B9J08_000085	0.172904	0.124675	hypothetical protein
B9J08_000086	0.0401801	0.711899	hypothetical protein
B9J08_000087	-0.252394	1.53e-06	hypothetical protein
B9J08_000088	-0.120512	0.0655475	hypothetical protein
B9J08_000089	-0.194572	0.0761248	hypothetical protein
B9J08_000090	-0.825994	8.5e-67	60S ribosomal protein L18-A
B9J08_000091	-0.744991	3.7e-57	40S ribosomal protein S19-A
B9J08_000092	0.0924324	0.091685	hypothetical protein
B9J08_000093	-0.0354412	0.537746	hypothetical protein
B9J08_000094	-0.175598	0.0294765	hypothetical protein
B9J08_000095	-0.272531	4.77e-08	hypothetical protein
B9J08_000096	-0.206684	0.000502985	hypothetical protein
B9J08_000097	0.0414053	0.562716	hypothetical protein
B9J08_000098	0.341413	4.5e-10	hypothetical protein
B9J08_000099	0.257371	8.13e-06	hypothetical protein
B9J08_000100	0.189271	0.02804	hypothetical protein
B9J08_000101	0.0926841	0.594646	hypothetical protein
B9J08_000102	-1.10915	2.42e-99	heat shock protein SSB1
B9J08_000103	0.011172	0.898589	hypothetical protein
B9J08_000104	-0.133725	0.169367	hypothetical protein
B9J08_000105	-0.0240078	0.648084	hypothetical protein
B9J08_000106	-0.876837	7.55e-32	hypothetical protein
B9J08_000107	-0.971768	1.76e-93	40S ribosomal protein S20
B9J08_000108	-0.385855	5.78e-11	hypothetical protein
B9J08_000109	-0.110511	0.0428998	hypothetical protein
B9J08_000110	-0.268884	0.0172661	hypothetical protein
B9J08_000111	0.0407599	0.566771	hypothetical protein
B9J08_000112	-0.219173	2.97e-05	hypothetical protein
B9J08_000113	0.0308382	0.673925	SUMO-conjugating enzyme UBC9
B9J08_000114	-0.17854	0.0028185	hypothetical protein
B9J08_000115	0.108448	0.0895036	hypothetical protein
B9J08_000116	0.668806	0.26733	hypothetical protein
B9J08_000117	0.170581	0.449259	hypothetical protein
B9J08_000118	-0.0788053	0.249127	hypothetical protein
B9J08_000119	-0.29245	0.000594405	hypothetical protein
B9J08_000120	-0.550225	1.75e-16	hypothetical protein
B9J08_000121	-0.223296	0.000877699	hypothetical protein
B9J08_000122	-0.856606	1.87e-43	hypothetical protein
B9J08_000123	0.0658623	0.273671	hypothetical protein
B9J08_000124	0.0179637	0.770935	hypothetical protein
B9J08_000125	NA	NA	tRNA-Gly
B9J08_000126	NA	NA	tRNA-Asp
B9J08_000127	-0.113526	0.077064	hypothetical protein
B9J08_000128	0.174553	0.149808	hypothetical protein
B9J08_000129	-0.397119	9.55e-10	hypothetical protein
B9J08_000130	0.0558441	0.441527	hypothetical protein
B9J08_000131	0.112369	0.0246261	hypothetical protein
B9J08_000132	-0.0028575	0.960299	mannan polymerase II complex ANP1 subunit
B9J08_000133	0.0982722	0.133305	hypothetical protein
B9J08_000134	-0.189338	0.000278758	hypothetical protein
B9J08_000135	0.198822	0.0345044	hypothetical protein
B9J08_000136	-0.841026	7.15e-70	hypothetical protein
B9J08_000137	-0.216965	0.000128333	hypothetical protein
B9J08_000138	-0.0290373	0.681967	hypothetical protein
B9J08_000139	-0.176578	0.0296523	hypothetical protein
B9J08_000140	-0.0656396	0.171517	hypothetical protein
B9J08_000141	-0.0381338	0.442685	protein phosphatase PP2A regulatory subunit B
B9J08_000142	-0.770925	1.94e-63	40S ribosomal protein S26-B
B9J08_000143	-0.275625	4.42e-10	hypothetical protein
B9J08_000144	-0.302276	3.2e-09	hypothetical protein
B9J08_000145	0.0456191	0.372057	hypothetical protein
B9J08_000146	0.0147997	0.958245	hypothetical protein
B9J08_000147	0.389621	6.89e-06	hypothetical protein
B9J08_000148	0.109101	0.0220402	hypothetical protein
B9J08_000149	-0.115093	0.0638698	hypothetical protein
B9J08_000150	-0.689771	9.46e-33	succinate dehydrogenase, cytochrome b556 subunit
B9J08_000151	-0.0384416	0.615075	hypothetical protein
B9J08_000152	-0.40443	3.55e-07	hypothetical protein
B9J08_000153	0.673024	5.57e-08	hypothetical protein
B9J08_000154	-0.570952	1.11e-17	hypothetical protein
B9J08_000155	-0.139521	0.0932246	hypothetical protein
B9J08_000156	-1.01661	1.32e-51	hypothetical protein
B9J08_000157	0.135797	0.0161453	hypothetical protein
B9J08_000158	0.0798557	0.488934	hypothetical protein
B9J08_000159	0.216164	7.99e-06	hypothetical protein
B9J08_000160	-0.202785	0.00791719	hypothetical protein
B9J08_000161	-0.274768	0.00043595	hypothetical protein
B9J08_000162	-0.100265	0.0949025	hypothetical protein
B9J08_000163	0.346878	0.000938589	tRNA(His) guanylyltransferase
B9J08_000164	-1.16271	9.16e-106	multidrug resistance protein CDR1
B9J08_000165	0.221395	0.00456289	hypothetical protein
B9J08_000166	0.020088	0.774548	hypothetical protein
B9J08_000167	-0.819047	0.421195	tRNA-Thr
B9J08_000168	0.337153	8.37e-07	hypothetical protein
B9J08_000169	0.812448	8.88e-10	hypothetical protein
B9J08_000170	0.92999	3.53e-34	hypothetical protein
B9J08_000171	-0.0080547	0.917914	serine/threonine-protein kinase BUR1
B9J08_000172	-0.376666	1.15e-14	hypothetical protein
B9J08_000173	-0.996957	3.07e-102	cytochrome c1, heme protein, mitochondrial
B9J08_000174	-0.412165	1.01e-17	hypothetical protein
B9J08_000175	0.040572	0.504955	calcium-translocating P-type ATPase, PMCA-type
B9J08_000176	0.162427	0.0486888	hypothetical protein
B9J08_000177	-0.107446	0.0862535	hypothetical protein
B9J08_000178	0.437015	1.98e-15	oleate-induced peroxisomal protein POX18
B9J08_000179	-0.500163	3.74e-13	hypothetical protein
B9J08_000180	-0.236691	0.000136629	hypothetical protein
B9J08_000181	-0.0996448	0.0709758	hypothetical protein
B9J08_000182	-0.506593	3.69e-20	hypothetical protein
B9J08_000183	0.128902	0.0327172	hypothetical protein
B9J08_000184	0.374391	2.84e-10	hypothetical protein
B9J08_000185	-0.819879	4.85e-72	40S ribosomal protein S7-A
B9J08_000186	0.285918	2.53e-06	ribose-5-phosphate isomerase
B9J08_000187	-0.15631	0.00675428	hypothetical protein
B9J08_000188	-0.310352	2.23e-06	pre-mRNA-splicing factor ATP-dependent RNA helicase PRP43
B9J08_000189	-0.411093	5.12e-16	hypothetical protein
B9J08_000190	0.307983	3.76e-08	hypothetical protein
B9J08_000191	NA	NA	tRNA-Glu
B9J08_000192	-0.397346	1.58e-09	DNA-directed RNA polymerase I subunit RPA2
B9J08_000193	-0.107806	0.3432	hypothetical protein
B9J08_000194	0.267497	0.00131651	hypothetical protein
B9J08_000195	0.468417	5.75e-16	hypothetical protein
B9J08_000196	0.0471607	0.445789	hypothetical protein
B9J08_000197	0.275598	0.469132	hypothetical protein
B9J08_000198	-0.0822852	0.174074	hypothetical protein
B9J08_000199	0.374088	5.8e-05	hypothetical protein
B9J08_000200	-0.599624	1.32e-27	leucine-tRNA ligase
B9J08_000201	-0.535577	2.03e-17	hypothetical protein
B9J08_000202	0.0746607	0.311419	hypothetical protein
B9J08_000203	-0.739561	1.07e-55	40S ribosomal protein S9-A
B9J08_000204	0.128268	0.0214646	hypothetical protein
B9J08_000205	0.416259	2.14e-09	hypothetical protein
B9J08_000206	0.126683	0.0830647	hypothetical protein
B9J08_000207	-0.410985	3.16e-05	hypothetical protein
B9J08_000208	-0.750577	4.34e-26	hypothetical protein
B9J08_000209	-0.853429	2.23e-65	60S acidic ribosomal protein P1-B
B9J08_000210	-1.4758	2.81e-87	hypothetical protein
B9J08_000211	-0.232274	0.00696763	hypothetical protein
B9J08_000212	NA	NA	tRNA-Thr
B9J08_000213	-0.0600739	0.242273	hypothetical protein
B9J08_000214	-0.0136685	0.848556	hypothetical protein
B9J08_000215	-0.286714	2.4e-05	DNA-directed RNA polymerase I, II, and III subunit RPABC5
B9J08_000216	0.214834	0.000111999	hypothetical protein
B9J08_000217	-1.06961	1.25e-90	ribosomal protein L27
B9J08_000218	1.10595	0.824817	tRNA-Gly
B9J08_000219	1.10595	0.824817	tRNA-Asp
B9J08_000220	-1.01831	2.86e-68	hypothetical protein
B9J08_000221	-0.316939	0.00020553	hypothetical protein
B9J08_000222	-0.318891	2.97e-07	hypothetical protein
B9J08_000223	-0.292576	8.09e-06	GTP-binding protein YchF
B9J08_000224	0.205969	0.0417513	hypothetical protein
B9J08_000225	-0.0352449	0.686767	hypothetical protein
B9J08_000226	-0.962062	5.7e-59	hypothetical protein
B9J08_000227	0.100085	0.222105	hypothetical protein
B9J08_000228	0.10732	0.0218307	hypothetical protein
B9J08_000229	0.0298135	0.678968	3-isopropylmalate dehydrogenase
B9J08_000230	-0.355376	5.48e-13	cysteine desulfurase, mitochondrial
B9J08_000231	-0.0568675	0.385309	hypothetical protein
B9J08_000232	0.155904	0.0951234	hypothetical protein
B9J08_000233	-0.505124	0.00175479	hypothetical protein
B9J08_000234	0.181864	0.0113415	hypothetical protein
B9J08_000235	0.23209	0.00366532	hypothetical protein
B9J08_000236	-0.907021	2.43e-53	hypothetical protein
B9J08_000237	0.448882	1.02e-12	hypothetical protein
B9J08_000238	0.947926	5.94e-70	hypothetical protein
B9J08_000239	0.457332	5.54e-08	hypothetical protein
B9J08_000240	0.0522354	0.388227	hypothetical protein
B9J08_000241	0.219603	0.0058039	hypothetical protein
B9J08_000242	0.0345169	0.696479	hypothetical protein
B9J08_000243	0.146522	0.00606402	hypothetical protein
B9J08_000244	0.189568	0.105379	hypothetical protein
B9J08_000245	-0.0140557	0.850721	hypothetical protein
B9J08_000246	0.173358	0.0044341	hypothetical protein
B9J08_000247	0.158302	0.0224566	hypothetical protein
B9J08_000248	-0.216706	0.00534724	hypothetical protein
B9J08_000249	-1.30554	0.000112106	hypothetical protein
B9J08_000250	0.142071	0.0248767	hypothetical protein
B9J08_000251	-0.0749716	0.164917	hypothetical protein
B9J08_000252	-0.00387043	0.957932	hypothetical protein
B9J08_000253	-0.221023	3.59e-06	hypothetical protein
B9J08_000254	-0.831605	3.85e-68	40S ribosomal protein S17-B
B9J08_000255	-0.086284	0.242395	transcriptional adapter 2
B9J08_000256	0.0436583	0.488778	hypothetical protein
B9J08_000257	-0.163471	0.0906523	hypothetical protein
B9J08_000258	0.760335	1.33e-21	hypothetical protein
B9J08_000259	-0.507135	4.49e-12	hypothetical protein
B9J08_000260	-0.13583	0.013479	hypothetical protein
B9J08_000261	0.626011	3.94e-36	hypothetical protein
B9J08_000262	0.348282	1.06e-11	calcium/proton exchanger
B9J08_000263	0.284874	3.15e-06	hypothetical protein
B9J08_000264	-0.242353	4.74e-07	T-complex protein 1 subunit alpha
B9J08_000265	0.151673	0.829515	5S ribosomal RNA
B9J08_000266	0.442393	0.00342898	hypothetical protein
B9J08_000267	0.19325	0.00413295	hypothetical protein
B9J08_000268	0.362635	1.91e-13	hypothetical protein
B9J08_000269	0.251407	1.8e-07	cell division control protein 42
B9J08_000270	0.319429	2.07e-10	hypothetical protein
B9J08_000271	-0.483448	2.7e-15	hypothetical protein
B9J08_000272	0.058383	0.565949	clathrin-associated protein AP-3 complex component APS3
B9J08_000273	-0.446454	1.65e-13	kynureninase
B9J08_000274	0.631336	2.64e-07	enolase 2
B9J08_000275	-0.155995	0.00278532	hypothetical protein
B9J08_000276	-0.497294	1.01e-18	chaperone DnaK
B9J08_000277	-0.413701	3.3e-06	hypothetical protein
B9J08_000278	-0.73263	9.36e-20	hypothetical protein
B9J08_000279	0.217539	0.0156587	hypothetical protein
B9J08_000280	0.227052	0.00156614	hypothetical protein
B9J08_000281	0.132961	0.0281457	hypothetical protein
B9J08_000282	0.248564	0.00290013	hypothetical protein
B9J08_000283	0.462712	5.5e-12	secondary thiamine-phosphate synthase enzyme
B9J08_000284	0.0808414	0.324916	hypothetical protein
B9J08_000285	0.217748	4.51e-06	hypothetical protein
B9J08_000286	-0.29991	4.26e-06	hypothetical protein
B9J08_000287	0.345528	2.38e-05	hypothetical protein
B9J08_000288	0.0938252	0.049024	hypothetical protein
B9J08_000289	0.173538	0.00483201	hypothetical protein
B9J08_000290	-0.0855999	0.0844076	hypothetical protein
B9J08_000291	-0.0824823	0.158286	hypothetical protein
B9J08_000292	0.510002	5.17e-10	hypothetical protein
B9J08_000293	-0.960247	8.87e-43	hypothetical protein
B9J08_000294	0.312154	0.00119407	hypothetical protein
B9J08_000295	-0.165711	0.119395	hypothetical protein
B9J08_000296	-0.0931581	0.10556	hypothetical protein
B9J08_000297	0.230044	0.0389115	hypothetical protein
B9J08_000298	0.183578	0.0480083	hypothetical protein
B9J08_000299	-0.576204	5.29e-20	hypothetical protein
B9J08_000300	-0.517212	1.54e-17	hypothetical protein
B9J08_000301	0.261107	0.000117536	hypothetical protein
B9J08_000302	-0.148626	0.0771447	hypothetical protein
B9J08_000303	-0.00971984	0.869258	hypothetical protein
B9J08_000304	NA	NA	tRNA-Arg
B9J08_000305	NA	NA	tRNA-Phe
B9J08_000306	0.103256	0.140661	hypothetical protein
B9J08_000307	0.116204	0.0404285	hypothetical protein
B9J08_000308	0.238681	0.0117391	hypothetical protein
B9J08_000309	0.168418	0.00883127	hypothetical protein
B9J08_000310	0.00691618	0.913245	hypothetical protein
B9J08_000311	-0.165875	0.0478034	hypothetical protein
B9J08_000312	-0.678015	1.23e-33	hypothetical protein
B9J08_000313	0.731255	3.41e-11	hypothetical protein
B9J08_000314	0.620727	3.57e-17	hypothetical protein
B9J08_000315	-0.0597035	0.276161	hypothetical protein
B9J08_000316	-0.0648023	0.288514	hypothetical protein
B9J08_000317	-0.0261388	0.729519	hypothetical protein
B9J08_000318	2.11274	0.565008	tRNA-Lys
B9J08_000319	0.153646	0.286932	adenosine deaminase
B9J08_000320	-0.0658705	0.17375	D-3-phosphoglycerate dehydrogenase 1
B9J08_000321	-0.132621	0.469153	hypothetical protein
B9J08_000322	0.301762	0.20212	hypothetical protein
B9J08_000323	-0.261325	6.33e-08	hypothetical protein
B9J08_000324	-0.239966	1.26e-05	hypothetical protein
B9J08_000325	-0.233396	0.00154704	hypothetical protein
B9J08_000326	0.133658	0.0768702	protoporphyrinogen oxidase
B9J08_000327	-0.187349	0.347436	hypothetical protein
B9J08_000328	-1.21125	3.6e-28	peptide chain release factor 1
B9J08_000329	NA	NA	hypothetical protein
B9J08_000330	-0.785571	1.75e-28	hypothetical protein
B9J08_000331	-0.328377	1.36e-07	hypothetical protein
B9J08_000332	-0.102954	0.0782081	hypothetical protein
B9J08_000333	0.16378	0.15813	hypothetical protein
B9J08_000334	0.753129	2.25e-45	hypothetical protein
B9J08_000335	-0.285395	0.00125673	hypothetical protein
B9J08_000336	1.38445	3.41e-109	hypothetical protein
B9J08_000337	0.0830164	0.10817	hypothetical protein
B9J08_000338	-0.174635	0.00125845	hypothetical protein
B9J08_000339	-0.583392	8.2e-35	hypothetical protein
B9J08_000340	0.282005	1.36e-06	hypothetical protein
B9J08_000341	-0.0647787	0.335124	hypothetical protein
B9J08_000342	-0.0959567	0.368213	hypothetical protein
B9J08_000343	0.269916	0.00127424	hypothetical protein
B9J08_000344	0.119756	0.0642295	hypothetical protein
B9J08_000345	-2.08341	1.68e-140	hypothetical protein
B9J08_000346	-0.796109	1.66e-60	60S ribosomal protein L28
B9J08_000347	0.346199	2.93e-07	hypothetical protein
B9J08_000348	0.18106	0.00197227	hypothetical protein
B9J08_000349	0.122409	0.0603408	hypothetical protein
B9J08_000350	0.655787	1.31e-33	hypothetical protein
B9J08_000351	-0.45766	6.7e-15	methionine-tRNA ligase, beta subunit
B9J08_000352	0.246651	0.00498604	hypothetical protein
B9J08_000353	-0.0568392	0.330826	mRNA surveillance protein pelota
B9J08_000354	0.259768	7.96e-07	hypothetical protein
B9J08_000355	-0.110096	0.084002	hypothetical protein
B9J08_000356	-1.07673	8.81e-53	glutamate-tRNA ligase
B9J08_000357	-0.769141	5e-09	hypothetical protein
B9J08_000358	-0.181483	0.00029258	hypothetical protein
B9J08_000359	0.237109	0.0136361	hypothetical protein
B9J08_000360	0.012541	0.853357	hypothetical protein
B9J08_000361	0.228174	0.00185072	hypothetical protein
B9J08_000362	0.360259	8.8e-08	hypothetical protein
B9J08_000363	-1.7658	7.83e-80	hypothetical protein
B9J08_000364	-0.122403	0.0830974	hypothetical protein
B9J08_000365	0.235217	0.0108642	hypothetical protein
B9J08_000366	0.0802688	0.276537	hypothetical protein
B9J08_000367	0.0294651	0.660223	methylsterol monooxygenase
B9J08_000368	0.918579	1.13e-10	hypothetical protein
B9J08_000369	0.550766	7.23e-13	hypothetical protein
B9J08_000370	0.642769	1.02e-23	D-arabinitol 2-dehydrogenase [ribulose-forming]
B9J08_000371	0.141676	0.0797091	GTP-binding protein GTR2
B9J08_000372	0.0165913	0.989004	hypothetical protein
B9J08_000373	0.0671551	0.345434	hypothetical protein
B9J08_000374	-0.154658	0.00974777	hypothetical protein
B9J08_000375	0.125039	0.0143999	hypothetical protein
B9J08_000376	-0.0379377	0.411669	hypothetical protein
B9J08_000377	-0.70895	4.59e-21	peptidyl-tRNA hydrolase
B9J08_000378	-0.121498	0.048109	hypothetical protein
B9J08_000379	0.0720479	0.165071	anthranilate synthase component I
B9J08_000380	-0.217579	0.0039276	hypothetical protein
B9J08_000381	0.0299724	0.582579	hypothetical protein
B9J08_000382	0.690597	1.37e-50	5-methyltetrahydropteroyltriglutamate-homocysteine methyltransferase
B9J08_000383	0.00238537	0.964192	hypothetical protein
B9J08_000384	-0.538209	1.96e-33	hypothetical protein
B9J08_000385	0.201825	0.00128593	hypothetical protein
B9J08_000386	-0.767533	0.681406	tRNA-Thr
B9J08_000387	3.11275	0.266627	tRNA-Lys
B9J08_000388	0.133628	0.071076	hypothetical protein
B9J08_000389	2.23146	1.02e-10	hypothetical protein
B9J08_000390	-0.536401	4.38e-06	hypothetical protein
B9J08_000391	-0.809353	6.7e-34	hypothetical protein
B9J08_000392	-0.333918	9.16e-09	hypothetical protein
B9J08_000393	0.0445448	0.519397	hypothetical protein
B9J08_000394	-0.357353	0.0162492	hypothetical protein
B9J08_000395	-0.228936	1.1e-05	hypothetical protein
B9J08_000396	-0.00156077	0.980669	hypothetical protein
B9J08_000397	-0.0552777	0.381144	hypothetical protein
B9J08_000398	0.802725	8.71e-24	hypothetical protein
B9J08_000399	-0.14122	0.0622738	hypothetical protein
B9J08_000400	0.220043	0.000660672	hypothetical protein
B9J08_000401	-0.00727915	0.891643	hypothetical protein
B9J08_000402	0.0108092	0.877565	hypothetical protein
B9J08_000403	-0.504769	6.61e-24	hypothetical protein
B9J08_000404	-0.0222486	0.71277	hypothetical protein
B9J08_000405	-0.224663	0.000132544	hypothetical protein
B9J08_000406	-0.00706914	0.928145	hypothetical protein
B9J08_000407	-0.0871546	0.414566	hypothetical protein
B9J08_000408	-0.170375	0.0334989	hypothetical protein
B9J08_000409	0.222141	2.8e-05	methylenetetrahydrofolate reductase
B9J08_000410	0.476616	2.89e-14	hypothetical protein
B9J08_000411	0.501589	2.54e-10	hypothetical protein
B9J08_000412	0.200928	0.0385937	hypothetical protein
B9J08_000413	-0.27437	1.64e-05	hypothetical protein
B9J08_000414	0.0533523	0.339095	hypothetical protein
B9J08_000415	0.0703498	0.264605	hypothetical protein
B9J08_000416	1.12891	0.821185	tRNA-Leu
B9J08_000417	-0.250764	6.12e-06	hypothetical protein
B9J08_000418	2.9166	1.87e-87	hypothetical protein
B9J08_000419	-0.508893	1.6e-17	hypothetical protein
B9J08_000420	-1.02806	1.24e-72	hypothetical protein
B9J08_000421	-0.0390391	0.549586	hypothetical protein
B9J08_000422	-0.0957368	0.0881716	hypothetical protein
B9J08_000423	-0.123586	0.0547258	hypothetical protein
B9J08_000424	-0.48589	6.9e-14	cytochrome c heme lyase
B9J08_000425	-1.19735	1.05e-90	hypothetical protein
B9J08_000426	1.12891	0.821185	tRNA-Val
B9J08_000427	0.285584	0.00855771	hypothetical protein
B9J08_000428	-0.691251	9.13e-24	tRNA pseudouridine(55) synthase
B9J08_000429	0.276513	0.000750325	hypothetical protein
B9J08_000430	0.591735	1.5e-08	hypothetical protein
B9J08_000431	-0.582448	6.71e-32	vacuolar protein sorting-associated protein 1
B9J08_000432	-0.351048	7.97e-09	hypothetical protein
B9J08_000433	-0.12287	0.0105549	S-adenosylmethionine decarboxylase proenzyme
B9J08_000434	-2.25298	3.23e-57	ADP,ATP carrier protein
B9J08_000435	-0.454873	7.69e-15	hypothetical protein
B9J08_000436	0.380311	7.54e-09	hypothetical protein
B9J08_000437	0.230614	0.000219922	ubiquitin-conjugating enzyme E2 13
B9J08_000438	-0.482971	0.0227124	hypothetical protein
B9J08_000439	0.476704	0.00729648	hypothetical protein
B9J08_000440	0.45919	9.88e-12	hypothetical protein
B9J08_000441	-0.653511	6.9e-20	hypothetical protein
B9J08_000442	-0.259293	6.59e-06	hypothetical protein
B9J08_000443	0.0129793	0.843028	hypothetical protein
B9J08_000444	-0.497343	5.15e-25	SEC14 cytosolic factor
B9J08_000445	-0.436802	2.93e-11	hypothetical protein
B9J08_000446	-0.0867621	0.303503	hypothetical protein
B9J08_000447	1.31572	7.62e-13	hypothetical protein
B9J08_000448	0.668065	1.63e-31	hypothetical protein
B9J08_000449	0.175332	0.000477247	hypothetical protein
B9J08_000450	-0.0148182	0.820498	hypothetical protein
B9J08_000451	-0.11777	0.0946884	hypothetical protein
B9J08_000452	0.344831	0.00222898	hypothetical protein
B9J08_000453	0.0122072	0.985005	tRNA-Leu
B9J08_000454	-0.0384022	0.524219	hypothetical protein
B9J08_000455	NA	NA	tRNA-Glu
B9J08_000456	0.222445	0.17767	hypothetical protein
B9J08_000457	0.874607	1.25e-57	hypothetical protein
B9J08_000458	0.0722501	0.276919	extracellular signal-regulated kinase 1
B9J08_000459	0.115459	0.0270778	hypothetical protein
B9J08_000460	-0.224399	1.75e-05	hypothetical protein
B9J08_000461	-0.784587	1.5e-65	40S ribosomal protein S27-B
B9J08_000462	-0.156878	0.00626182	serine/threonine-protein phosphatase PP1
B9J08_000463	0.379894	3.48e-11	hypothetical protein
B9J08_000464	0.264109	6.68e-05	hypothetical protein
B9J08_000465	-0.0933686	0.059143	chorismate synthase
B9J08_000466	-0.309156	1.45e-08	hypothetical protein
B9J08_000467	-0.382789	2.47e-13	hypothetical protein
B9J08_000468	0.0919169	0.0582849	hypothetical protein
B9J08_000469	-0.503179	3.45e-26	hypothetical protein
B9J08_000470	-1.33086	0.509637	tRNA-Lys
B9J08_000471	0.137123	0.0289578	hypothetical protein
B9J08_000472	0.073738	0.321272	hypothetical protein
B9J08_000473	-0.299465	4e-08	hypothetical protein
B9J08_000474	0.0841003	0.130964	hypothetical protein
B9J08_000475	-0.557553	8.22e-20	eukaryotic translation initiation factor 6
B9J08_000476	-0.0569507	0.214696	hypothetical protein
B9J08_000477	1.23406	0.643045	tRNA-Gln
B9J08_000478	0.870148	2.43e-41	hypothetical protein
B9J08_000479	-0.550602	8.46e-27	hypothetical protein
B9J08_000480	-0.0609988	0.184241	cell division control protein 48
B9J08_000481	-0.251527	0.00141106	hypothetical protein
B9J08_000482	0.385394	3.26e-08	hypothetical protein
B9J08_000483	0.16282	0.00395293	heat shock protein SSA1
B9J08_000484	-0.181938	0.000258253	glycine cleavage system H protein
B9J08_000485	0.635807	6.91e-23	hypothetical protein
B9J08_000486	0.536019	9.71e-34	actin
B9J08_000487	0.0627606	0.249778	hypothetical protein
B9J08_000488	-0.0788985	0.196885	hypothetical protein
B9J08_000489	-0.153306	0.0613329	hypothetical protein
B9J08_000490	-0.100762	0.0423676	hypothetical protein
B9J08_000491	0.37129	2.74e-09	hypothetical protein
B9J08_000492	-0.329954	2.76e-11	hypothetical protein
B9J08_000493	0.786663	5.26e-19	hypothetical protein
B9J08_000494	-0.328291	7.48e-10	hypothetical protein
B9J08_000495	-0.411381	1.88e-11	hypothetical protein
B9J08_000496	-0.0844719	0.0895729	5-formyltetrahydrofolate cyclo-ligase
B9J08_000497	0.00716941	0.908162	hypothetical protein
B9J08_000498	0.123214	0.00525058	inorganic pyrophosphatase
B9J08_000499	0.610082	7.07e-11	hypothetical protein
B9J08_000500	0.0221429	0.722929	hypothetical protein
B9J08_000501	1.10456	2.03e-93	hypothetical protein
B9J08_000502	0.191822	0.173561	hypothetical protein
B9J08_000503	0.150134	0.0765314	hypothetical protein
B9J08_000504	-0.00826169	0.89672	hypothetical protein
B9J08_000505	0.201655	0.0124278	hypothetical protein
B9J08_000506	0.189512	0.000292317	V-type proton ATPase subunit D
B9J08_000507	-0.438958	7.74e-19	succinate dehydrogenase [ubiquinone] flavoprotein subunit, mitochondrial
B9J08_000508	-0.0136583	0.79866	hypothetical protein
B9J08_000509	0.722791	5.03e-19	hypothetical protein
B9J08_000510	0.091475	0.0629139	hypothetical protein
B9J08_000511	-0.162746	0.00136204	hypothetical protein
B9J08_000512	0.0547429	0.459286	hypothetical protein
B9J08_000513	-0.0514185	0.30333	hypothetical protein
B9J08_000514	-0.0919037	0.158597	hypothetical protein
B9J08_000515	0.196237	0.00591505	hypothetical protein
B9J08_000516	0.0607357	0.360218	hypothetical protein
B9J08_000517	1.05674	2.4e-85	hypothetical protein
B9J08_000518	-0.133218	0.0352241	hypothetical protein
B9J08_000519	0.590196	1.12e-16	hypothetical protein
B9J08_000520	0.239664	4.77e-06	hypothetical protein
B9J08_000521	-0.0728258	0.310629	hypothetical protein
B9J08_000522	-0.211562	9.75e-05	serine-tRNA ligase
B9J08_000523	-0.876521	2.33e-44	hypothetical protein
B9J08_000524	0.163061	0.00234669	hypothetical protein
B9J08_000525	0.164218	0.0710341	hypothetical protein
B9J08_000526	0.0791961	0.163675	hypothetical protein
B9J08_000527	0.238107	0.000652198	hypothetical protein
B9J08_000528	0.515641	4.41e-25	superoxide dismutase [Mn], mitochondrial
B9J08_000529	0.2813	1.84e-06	hypothetical protein
B9J08_000530	-0.00620517	0.917987	hypothetical protein
B9J08_000531	-0.0227952	0.788239	hypothetical protein
B9J08_000532	0.285423	4.67e-05	hypothetical protein
B9J08_000533	0.0661421	0.427591	hypothetical protein
B9J08_000534	-0.220892	0.00312743	hypothetical protein
B9J08_000535	0.252295	0.0283655	hypothetical protein
B9J08_000536	-0.0760492	0.22635	hypothetical protein
B9J08_000537	-0.172878	0.0753481	pre-rRNA-processing protein PNO1
B9J08_000538	-0.345895	3.16e-05	hypothetical protein
B9J08_000539	-0.121334	0.184233	hypothetical protein
B9J08_000540	0.35285	0.00677895	hypothetical protein
B9J08_000541	-0.127555	0.0371921	hypothetical protein
B9J08_000542	-0.218999	0.000133556	hypothetical protein
B9J08_000543	-0.0187401	0.740549	thioredoxin
B9J08_000544	-0.0463818	0.563866	hypothetical protein
B9J08_000545	-0.46722	9.1e-16	hypothetical protein
B9J08_000546	-0.600763	8.04e-13	hypothetical protein
B9J08_000547	0.11398	0.0810197	hypothetical protein
B9J08_000548	-0.283785	0.000444603	hypothetical protein
B9J08_000549	-0.198507	0.0192553	hypothetical protein
B9J08_000550	-0.0322602	0.696597	hypothetical protein
B9J08_000551	-0.133623	0.064376	hypothetical protein
B9J08_000552	0.327382	2.08e-06	hypothetical protein
B9J08_000553	-1.20604	2.26e-87	hypothetical protein
B9J08_000554	-0.777809	5.92e-70	60S ribosomal protein L25
B9J08_000555	-0.267816	5.17e-07	hypothetical protein
B9J08_000556	-0.0849044	0.209021	hypothetical protein
B9J08_000557	-0.218203	0.779965	hypothetical protein
B9J08_000558	0.423313	2.29e-07	hypothetical protein
B9J08_000559	0.567057	1.69e-19	S-formylglutathione hydrolase
B9J08_000560	-0.00971427	0.910603	hypothetical protein
B9J08_000561	0.221102	0.000188638	hypothetical protein
B9J08_000562	-0.163197	0.741087	hypothetical protein
B9J08_000563	-1.54036	4.53e-06	hypothetical protein
B9J08_000564	1.88651	0.173555	tRNA-Asn
B9J08_000565	-1.08075	8.91e-67	ribosomal protein L17
B9J08_000566	0.337827	9.55e-07	hypothetical protein
B9J08_000567	-0.560988	8.06e-16	hypothetical protein
B9J08_000568	0.432713	0.111231	hypothetical protein
B9J08_000569	-1.00349	1.19e-68	hypothetical protein
B9J08_000570	0.0290662	0.759495	hypothetical protein
B9J08_000571	-0.0118245	0.86926	hypothetical protein
B9J08_000572	-0.10782	0.0864906	hypothetical protein
B9J08_000573	-0.124516	0.159717	hypothetical protein
B9J08_000574	-0.205435	0.0214069	hypothetical protein
B9J08_000575	-0.070642	0.5613	hypothetical protein
B9J08_000576	-0.0929098	0.0768457	hypothetical protein
B9J08_000577	0.117811	0.0821796	hypothetical protein
B9J08_000578	-0.304731	1.38e-06	hypothetical protein
B9J08_000579	0.551699	2.02e-16	hypothetical protein
B9J08_000580	-0.0872027	0.439668	hypothetical protein
B9J08_000581	-0.31295	5.5e-11	hypothetical protein
B9J08_000582	0.486938	4.65e-05	hypothetical protein
B9J08_000583	-0.189998	0.0415802	hypothetical protein
B9J08_000584	0.11155	0.0395768	hypothetical protein
B9J08_000585	NA	NA	tRNA-Thr
B9J08_000586	-0.617538	3.66e-28	hypothetical protein
B9J08_000587	0.592647	4.29e-27	hypothetical protein
B9J08_000588	-0.167163	0.00267464	hypothetical protein
B9J08_000589	0.536184	3.02e-24	hypothetical protein
B9J08_000590	-0.17905	0.000504378	hypothetical protein
B9J08_000591	-0.117563	0.0342135	hypothetical protein
B9J08_000592	2.19135	2.05e-284	hypothetical protein
B9J08_000593	0.430879	6.35e-10	hypothetical protein
B9J08_000594	0.569997	5.94e-22	hypothetical protein
B9J08_000595	0.545222	1.05e-15	hypothetical protein
B9J08_000596	-0.130957	0.0664203	hypothetical protein
B9J08_000597	-0.531633	2.57e-10	hypothetical protein
B9J08_000598	0.104054	0.100283	hypothetical protein
B9J08_000599	-0.162391	0.0226602	hypothetical protein
B9J08_000600	0.309587	2.3e-05	hypothetical protein
B9J08_000601	-0.191333	0.0075794	hypothetical protein
B9J08_000602	-0.460284	4.55e-18	leukotriene A-4 hydrolase/aminopeptidase
B9J08_000603	0.275134	3.8e-06	hypothetical protein
B9J08_000604	-0.858364	1.79e-76	40S ribosomal protein S22
B9J08_000605	-0.778203	6.03e-58	40S ribosomal protein S14
B9J08_000606	0.793471	0.302906	hypothetical protein
B9J08_000607	0.376302	1.66e-08	hypothetical protein
B9J08_000608	0.0636046	0.377804	hypothetical protein
B9J08_000609	0.505095	3.15e-15	hypothetical protein
B9J08_000610	0.393392	1.57e-11	hypothetical protein
B9J08_000611	-0.200146	0.000303122	hypothetical protein
B9J08_000612	0.0282287	0.755629	hypothetical protein
B9J08_000613	-0.397853	3.39e-09	hypothetical protein
B9J08_000614	0.0809574	0.0878926	hypothetical protein
B9J08_000615	0.382025	6.35e-14	hypothetical protein
B9J08_000616	0.253552	2.98e-07	hypothetical protein
B9J08_000617	0.657869	3.05e-11	hypothetical protein
B9J08_000618	0.528294	8.89e-13	hypothetical protein
B9J08_000619	-0.169602	0.000803001	ubiquinone biosynthesis protein COQ4, mitochondrial
B9J08_000620	-0.0027917	0.963327	hypothetical protein
B9J08_000621	0.0574566	0.631027	hypothetical protein
B9J08_000622	0.0733895	0.242612	lipoyl(octanoyl) transferase
B9J08_000623	0.193069	0.0164333	hypothetical protein
B9J08_000624	0.203425	0.0366183	hypothetical protein
B9J08_000625	-0.666217	5.63e-31	hypothetical protein
B9J08_000626	-0.137683	0.0486682	hypothetical protein
B9J08_000627	0.119536	0.204582	hypothetical protein
B9J08_000628	-0.0312691	0.669666	hypothetical protein
B9J08_000629	0.110717	0.241525	hypothetical protein
B9J08_000630	-0.115722	0.0528026	hypothetical protein
B9J08_000631	0.0238221	0.673752	hypothetical protein
B9J08_000632	-0.766099	4.93e-54	ubiquitin-40S ribosomal protein S27a
B9J08_000633	-0.21776	0.000122503	hypothetical protein
B9J08_000634	-0.29597	3.5e-06	hypothetical protein
B9J08_000635	-0.507655	5.4e-17	hypothetical protein
B9J08_000636	-0.662497	2.8e-34	hypothetical protein
B9J08_000637	-0.0836892	0.16287	hypothetical protein
B9J08_000638	-1.08178	4.96e-72	hypothetical protein
B9J08_000639	1.45185	1.18e-99	hypothetical protein
B9J08_000640	0.498466	1.9e-13	hypothetical protein
B9J08_000641	-0.368854	0.889365	tRNA-Gly
B9J08_000642	0.628845	0.00417348	hypothetical protein
B9J08_000643	0.394239	3.22e-15	hypothetical protein
B9J08_000644	0.647736	1.02e-20	hypothetical protein
B9J08_000645	-0.332059	1.55e-10	peroxiredoxin TSA1
B9J08_000646	-0.0504804	0.490442	hypothetical protein
B9J08_000647	-0.0826314	0.380982	hypothetical protein
B9J08_000648	0.277816	3.77e-07	hypothetical protein
B9J08_000649	-1.14886	6.71e-87	protein FYV4, mitochondrial
B9J08_000650	-0.328994	6.14e-11	hypothetical protein
B9J08_000651	0.119458	0.0186919	hypothetical protein
B9J08_000652	0.0178429	0.95747	hypothetical protein
B9J08_000653	0.0178567	0.758765	hypothetical protein
B9J08_000654	0.235559	4.06e-07	hypothetical protein
B9J08_000655	0.638825	0.827934	tRNA-Ser
B9J08_000656	-0.351956	1.24e-09	hypothetical protein
B9J08_000657	0.0628769	0.206025	hypothetical protein
B9J08_000658	0.0264992	0.666413	hypothetical protein
B9J08_000659	-0.79245	7.24e-30	mitochondrial chaperone BCS1
B9J08_000660	0.152519	0.085968	hypothetical protein
B9J08_000661	-0.0527068	0.378748	hypothetical protein
B9J08_000662	-0.125737	0.0236047	hypothetical protein
B9J08_000663	0.883117	2.67e-30	hypothetical protein
B9J08_000664	0.207343	0.00418762	hypothetical protein
B9J08_000665	-0.272359	8.63e-06	respiratory supercomplex factor 1, mitochondrial
B9J08_000666	0.334064	2.9e-11	hypothetical protein
B9J08_000667	0.0387759	0.624099	hypothetical protein
B9J08_000668	0.0591522	0.355953	thiamine pyrophosphokinase
B9J08_000669	-0.96445	1.3e-37	hypothetical protein
B9J08_000670	-0.267013	0.000293326	inosine triphosphate pyrophosphatase
B9J08_000671	0.285982	5.6e-06	hypothetical protein
B9J08_000672	0.906584	0.439465	hypothetical protein
B9J08_000673	-0.160785	0.136581	rRNA-processing protein FCF1
B9J08_000674	-0.43894	1.15e-15	hypothetical protein
B9J08_000675	-0.000370895	0.995992	hypothetical protein
B9J08_000676	-0.198316	0.166009	hypothetical protein
B9J08_000677	0.0493138	0.621283	arsenical-resistance protein
B9J08_000678	-0.30518	8.49e-06	hypothetical protein
B9J08_000679	0.0469217	0.476344	hypothetical protein
B9J08_000680	-0.184737	0.000411209	hypothetical protein
B9J08_000681	0.458992	4.35e-20	hypothetical protein
B9J08_000682	0.400664	5.23e-11	hydroxyacylglutathione hydrolase
B9J08_000683	0.0729985	0.442424	hypothetical protein
B9J08_000684	-0.847291	1.1e-23	hypothetical protein
B9J08_000685	0.598203	1.29e-06	hypothetical protein
B9J08_000686	0.67403	2.98e-10	argininosuccinate synthase
B9J08_000687	0.258506	5.81e-07	hypothetical protein
B9J08_000688	0.254179	0.0111031	hypothetical protein
B9J08_000689	0.375919	1.36e-05	hypothetical protein
B9J08_000690	0.00162399	0.980976	hypothetical protein
B9J08_000691	0.233271	0.000727376	hypothetical protein
B9J08_000692	-0.631661	2.88e-29	hypothetical protein
B9J08_000693	0.050247	0.275312	hypothetical protein
B9J08_000694	0.706108	1.41e-25	malate dehydrogenase, cytoplasmic
B9J08_000695	0.115648	0.0295477	hypothetical protein
B9J08_000696	-0.669182	6.78e-26	hypothetical protein
B9J08_000697	-1.12182	1.05e-81	50S ribosomal protein L3
B9J08_000698	-1.12986	4.63e-72	hypothetical protein
B9J08_000699	0.0227333	0.867406	U3 small nucleolar ribonucleoprotein IMP3
B9J08_000700	-0.224104	7.69e-06	hypothetical protein
B9J08_000701	1.24295	2.11e-132	hypothetical protein
B9J08_000702	0.321255	0.00336626	hypothetical protein
B9J08_000703	-0.0509388	0.562999	hypothetical protein
B9J08_000704	-0.106085	0.0310311	hypothetical protein
B9J08_000705	-0.43863	1.23e-13	translation initiation factor RLI1
B9J08_000706	0.0160904	0.775487	hypothetical protein
B9J08_000707	0.227081	0.00956902	hypothetical protein
B9J08_000708	0.428847	0.0186769	hypothetical protein
B9J08_000709	0.118931	0.111581	hypothetical protein
B9J08_000710	0.0999488	0.0660325	hypothetical protein
B9J08_000711	-0.809167	4.66e-61	60S acidic ribosomal protein P0
B9J08_000712	-0.65679	0.0021087	hypothetical protein
B9J08_000713	-0.949112	7.1e-38	ribosomal protein S16
B9J08_000714	-0.466552	2.35e-10	hypothetical protein
B9J08_000715	-0.394592	7.71e-12	hypothetical protein
B9J08_000716	0.262124	0.000668485	hypothetical protein
B9J08_000717	0.161338	0.00625311	hypothetical protein
B9J08_000718	-0.13486	0.0592961	hypothetical protein
B9J08_000719	0.157054	0.0965379	hypothetical protein
B9J08_000720	-0.133123	0.0642352	hypothetical protein
B9J08_000721	-0.298731	0.00110229	hypothetical protein
B9J08_000722	0.451694	0.186866	hypothetical protein
B9J08_000723	-2.77393	0.412372	tRNA-Glu
B9J08_000724	0.347307	0.000214648	hypothetical protein
B9J08_000725	0.0744304	0.180404	hypothetical protein
B9J08_000726	-0.0173781	0.797369	hypothetical protein
B9J08_000727	-0.672569	1.37e-44	60S ribosomal protein L36
B9J08_000728	-0.992507	4.36e-82	hypothetical protein
B9J08_000729	0.196611	5.5e-05	hypothetical protein
B9J08_000730	0.0329159	0.555145	hypothetical protein
B9J08_000731	-0.0931796	0.0967542	hypothetical protein
B9J08_000732	-0.100397	0.219871	hypothetical protein
B9J08_000733	-0.418005	4.45e-17	hypothetical protein
B9J08_000734	-1.17728	1.84e-55	hypothetical protein
B9J08_000735	0.0116333	0.834111	hypothetical protein
B9J08_000736	0.174245	0.00334966	hypothetical protein
B9J08_000737	0.333773	8.91e-10	hypothetical protein
B9J08_000738	-0.458571	5.21e-09	hypothetical protein
B9J08_000739	-0.725938	1.52e-41	hypothetical protein
B9J08_000740	0.809467	2.07e-08	NADP-specific glutamate dehydrogenase
B9J08_000741	-0.39962	0.000236334	hypothetical protein
B9J08_000742	0.0299441	0.679968	hypothetical protein
B9J08_000743	-0.166104	0.0196345	YbgI/family dinuclear metal center protein
B9J08_000744	NA	NA	tRNA-Gly
B9J08_000745	NA	NA	tRNA-Thr
B9J08_000746	-0.0756383	0.30869	hypothetical protein
B9J08_000747	0.266551	0.0170331	hypothetical protein
B9J08_000748	-0.201851	4.87e-05	hypothetical protein
B9J08_000749	0.10456	0.0432806	hypothetical protein
B9J08_000750	0.502388	2.83e-14	hypothetical protein
B9J08_000751	0.126751	0.0532407	hypothetical protein
B9J08_000752	-0.0969258	0.0770619	hypothetical protein
B9J08_000753	0.027545	0.662263	hypothetical protein
B9J08_000754	-0.0159032	0.861077	hypothetical protein
B9J08_000755	1.43448	5.23e-137	hypothetical protein
B9J08_000756	0.736947	0.000103958	hypothetical protein
B9J08_000757	-0.610599	5.93e-35	hypothetical protein
B9J08_000758	-0.348484	0.000133577	hypothetical protein
B9J08_000759	0.3634	1.35e-07	hypothetical protein
B9J08_000760	-0.528033	9.04e-15	hypothetical protein
B9J08_000761	0.424358	3.82e-10	hypothetical protein
B9J08_000762	0.362088	4.53e-08	hypothetical protein
B9J08_000763	1.10595	0.824817	tRNA-Thr
B9J08_000764	-0.497564	3.27e-25	malate dehydrogenase, mitochondrial
B9J08_000765	-0.108762	0.0729608	hypothetical protein
B9J08_000766	-0.38058	2.08e-12	hypothetical protein
B9J08_000767	0.104751	0.167236	hypothetical protein
B9J08_000768	-0.0964243	0.0697424	hypothetical protein
B9J08_000769	-0.159553	0.00680393	hypothetical protein
B9J08_000770	0.322069	4.6e-05	hypothetical protein
B9J08_000771	-0.903152	6.86e-80	40S ribosomal protein S6
B9J08_000772	-0.111946	0.0910427	hypothetical protein
B9J08_000773	0.116983	0.0190992	hypothetical protein
B9J08_000774	-0.970246	7.49e-66	polyadenylate-binding protein, cytoplasmic and nuclear
B9J08_000775	-0.016503	0.744901	trehalose-phosphatase
B9J08_000776	-0.68234	2.89e-42	hypothetical protein
B9J08_000777	0.201023	0.000121418	hypothetical protein
B9J08_000778	0.0702908	0.189457	hypothetical protein
B9J08_000779	0.247653	0.000257814	hypothetical protein
B9J08_000780	-0.424339	2e-17	hypothetical protein
B9J08_000781	-0.26269	1.16e-06	hypothetical protein
B9J08_000782	-0.272859	0.000718109	hypothetical protein
B9J08_000783	0.274504	0.458001	hypothetical protein
B9J08_000784	-0.46811	0.0223046	hypothetical protein
B9J08_000785	-0.083403	0.615461	hypothetical protein
B9J08_000786	-0.135069	0.0198343	hypothetical protein
B9J08_000787	-0.217233	7.28e-06	hypothetical protein
B9J08_000788	-0.105738	0.0321755	histidine-tRNA ligase
B9J08_000789	-0.199333	5.32e-05	hypothetical protein
B9J08_000790	0.0548894	0.284665	hypothetical protein
B9J08_000791	1.19084	2.1e-60	hypothetical protein
B9J08_000792	0.486727	7.87e-09	hypothetical protein
B9J08_000793	-0.0121348	0.882414	hypothetical protein
B9J08_000794	0.35917	3.35e-07	hypothetical protein
B9J08_000795	0.466815	1.62e-10	hypothetical protein
B9J08_000796	0.186704	0.012253	hypothetical protein
B9J08_000797	0.174116	0.0819337	hypothetical protein
B9J08_000798	-0.150907	0.00788862	hypothetical protein
B9J08_000799	0.0764448	0.199314	hypothetical protein
B9J08_000800	-0.0222232	0.625859	adenylosuccinate lyase
B9J08_000801	-0.258333	0.0113682	hypothetical protein
B9J08_000802	0.482364	4.1e-14	hypothetical protein
B9J08_000803	0.658562	7.19e-38	hypothetical protein
B9J08_000804	-0.79424	9.83e-25	hypothetical protein
B9J08_000805	0.290075	0.00844079	hypothetical protein
B9J08_000806	0.0821519	0.236571	hypothetical protein
B9J08_000807	-0.00338101	0.956521	hypothetical protein
B9J08_000808	0.631673	2.15e-30	glucose-6-phosphate isomerase
B9J08_000809	-0.354038	2.38e-06	hypothetical protein
B9J08_000810	0.344277	1.71e-08	hypothetical protein
B9J08_000811	0.369856	3.53e-09	hypothetical protein
B9J08_000812	0.806298	8.45e-36	NADPH-dependent D-xylose reductase II,III
B9J08_000813	0.30116	1.23e-06	trimethyllysine dioxygenase
B9J08_000814	0.272973	5.91e-06	hypothetical protein
B9J08_000815	-0.215087	0.000458366	hypothetical protein
B9J08_000816	-1.23946	1.26e-125	nucleoside diphosphate kinase
B9J08_000817	0.559816	0.000972196	hypothetical protein
B9J08_000818	-0.0416957	0.487785	hypothetical protein
B9J08_000819	-0.13823	0.00458494	hypothetical protein
B9J08_000820	0.251078	0.000744464	hypothetical protein
B9J08_000821	-0.670775	1.01e-40	hypothetical protein
B9J08_000822	-0.0281619	0.629474	hypothetical protein
B9J08_000823	-0.783529	9.64e-66	60S ribosomal protein L44
B9J08_000824	0.269251	2.94e-08	hypothetical protein
B9J08_000825	-0.372764	3.65e-06	hypothetical protein
B9J08_000826	-0.278405	1.85e-05	hypothetical protein
B9J08_000827	-0.151126	0.0230912	hypothetical protein
B9J08_000828	0.0200714	0.778557	hypothetical protein
B9J08_000829	-0.422785	2.36e-10	hypothetical protein
B9J08_000830	-0.147453	0.159482	hypothetical protein
B9J08_000831	0.374058	1.53e-09	hypothetical protein
B9J08_000832	-3.77394	0.147854	tRNA-Thr
B9J08_000833	NA	NA	tRNA-Tyr
B9J08_000834	-1.21329	1.26e-09	hypothetical protein
B9J08_000835	0.114863	0.0431031	hypothetical protein
B9J08_000836	0.0354326	0.506168	hypothetical protein
B9J08_000837	-0.457426	3.12e-19	calcium-transporting P-type ATPase, PMR1-type
B9J08_000838	0.21421	0.054626	Sua5/YciO/YrdC/YwlC family tRNA threonylcarbamoyl adenosine modification protein
B9J08_000839	0.0403895	0.475157	hypothetical protein
B9J08_000840	0.382294	1.39e-08	hypothetical protein
B9J08_000841	0.18559	0.00221805	hypothetical protein
B9J08_000842	-0.129487	0.313518	hypothetical protein
B9J08_000843	0.0972783	0.0940076	hypothetical protein
B9J08_000844	0.999825	7.39e-77	hypothetical protein
B9J08_000845	0.596122	3.66e-16	hypothetical protein
B9J08_000846	1.07244	1.74e-07	hypothetical protein
B9J08_000847	0.00507427	0.937396	hypothetical protein
B9J08_000848	-0.0956492	0.0650018	hypothetical protein
B9J08_000849	3.08267	1.04e-51	hypothetical protein
B9J08_000850	0.593393	1.06e-20	hypothetical protein
B9J08_000851	-0.589777	0.383722	tRNA-Val
B9J08_000852	0.06054	0.378713	hypothetical protein
B9J08_000853	0.260595	0.263794	hypothetical protein
B9J08_000854	-0.38116	3.86e-11	hypothetical protein
B9J08_000855	0.746724	1.27e-35	hypothetical protein
B9J08_000856	0.154387	0.102625	hypothetical protein
B9J08_000857	0.158754	0.0984777	hypothetical protein
B9J08_000858	-0.180829	0.00383719	hypothetical protein
B9J08_000859	0.687319	4.27e-20	hypothetical protein
B9J08_000860	0.0801725	0.131552	hypothetical protein
B9J08_000861	0.220337	0.0100267	hypothetical protein
B9J08_000862	0.278095	0.000135862	hypothetical protein
B9J08_000863	0.619753	4.15e-17	4-aminobutyrate aminotransferase
B9J08_000864	-0.985739	2.72e-44	hypothetical protein
B9J08_000865	-0.222673	2.23e-05	hypothetical protein
B9J08_000866	-0.958534	2.14e-36	hypothetical protein
B9J08_000867	0.219166	0.00190943	V-type ATPase, F subunit
B9J08_000868	0.395628	8.37e-16	hypothetical protein
B9J08_000869	-0.208086	0.000191387	hypothetical protein
B9J08_000870	-0.325583	1.17e-05	hypothetical protein
B9J08_000871	0.881385	5.65e-46	hypothetical protein
B9J08_000872	-0.0496992	0.39162	hypothetical protein
B9J08_000873	-0.185141	0.0238364	mRNA 3'-end-processing protein YTH1
B9J08_000874	-0.0587388	0.176639	hypothetical protein
B9J08_000875	-0.288267	1.95e-05	hypothetical protein
B9J08_000876	0.10892	0.17609	hypothetical protein
B9J08_000877	-0.0232137	0.632132	hypothetical protein
B9J08_000878	-0.668411	4.44e-47	60S ribosomal protein L33-A
B9J08_000879	-0.0445836	0.450925	hypothetical protein
B9J08_000880	-0.0680745	0.231824	hypothetical protein
B9J08_000881	-0.0768635	0.133759	hypothetical protein
B9J08_000882	-0.381358	1.89e-12	hypothetical protein
B9J08_000883	-0.129217	0.0541652	hypothetical protein
B9J08_000884	0.0271704	0.748977	hypothetical protein
B9J08_000885	-0.365108	5.8e-05	hypothetical protein
B9J08_000886	-0.469574	7.36e-17	hypothetical protein
B9J08_000887	-0.314771	2.39e-07	hypothetical protein
B9J08_000888	0.299942	0.00125391	hypothetical protein
B9J08_000889	0.331532	6.47e-06	hypothetical protein
B9J08_000890	0.327962	2.85e-13	hypothetical protein
B9J08_000891	0.661448	0.751179	hypothetical protein
B9J08_000892	1.3792	2.76e-05	hypothetical protein
B9J08_000893	-2.31161	0.190621	tRNA-Tyr
B9J08_000894	-0.283559	7.91e-05	hypothetical protein
B9J08_000895	0.302483	5.22e-08	ribulose-phosphate 3-epimerase
B9J08_000896	0.0979967	0.376657	hypothetical protein
B9J08_000897	0.031793	0.627322	hypothetical protein
B9J08_000898	0.159302	0.0736041	hypothetical protein
B9J08_000899	0.419413	1.26e-08	hypothetical protein
B9J08_000900	0.0850863	0.236677	hypothetical protein
B9J08_000901	0.699701	1.4e-36	hypothetical protein
B9J08_000902	-0.0814457	0.172024	hypothetical protein
B9J08_000903	-0.175589	0.00355974	hypothetical protein
B9J08_000904	0.317227	0.00133964	hypothetical protein
B9J08_000905	0.10641	0.506767	hypothetical protein
B9J08_000906	0.176853	0.156431	hypothetical protein
B9J08_000907	0.0605824	0.366824	hypothetical protein
B9J08_000908	-0.35248	1.93e-08	hypothetical protein
B9J08_000909	0.00651679	0.934421	hypothetical protein
B9J08_000910	-0.630187	4.61e-16	hypothetical protein
B9J08_000911	0.108589	0.221425	hypothetical protein
B9J08_000912	0.0562671	0.396485	hypothetical protein
B9J08_000913	0.00507517	0.954539	hypothetical protein
B9J08_000914	-0.842892	4.47e-52	elongation factor 1-beta
B9J08_000915	-0.0997925	0.271527	hypothetical protein
B9J08_000916	0.109399	0.0773375	hypothetical protein
B9J08_000917	-0.798085	5.06e-24	hypothetical protein
B9J08_000918	1.80691	6.1e-89	hypothetical protein
B9J08_000919	0.358663	0.000162147	hypothetical protein
B9J08_000920	0.392023	6.89e-13	hypothetical protein
B9J08_000921	-0.0384867	0.454253	hypothetical protein
B9J08_000922	-0.322202	3.75e-06	hypothetical protein
B9J08_000923	-0.155731	0.01649	hypothetical protein
B9J08_000924	-0.359922	2.57e-07	hypothetical protein
B9J08_000925	0.108728	0.11947	hypothetical protein
B9J08_000926	-0.111157	0.0694934	hypothetical protein
B9J08_000927	-0.380769	6.79e-07	hypothetical protein
B9J08_000928	1.68646	4.34e-06	hypothetical protein
B9J08_000929	-0.0608677	0.26831	hypothetical protein
B9J08_000930	-0.799946	3.28e-08	hypothetical protein
B9J08_000931	0.163322	0.582411	hypothetical protein
B9J08_000932	-0.389192	6.34e-10	hypothetical protein
B9J08_000933	-0.496453	1.38e-15	hypothetical protein
B9J08_000934	-0.324409	1.48e-05	nucleolar GTP-binding protein 2
B9J08_000935	0.243873	0.00168069	hypothetical protein
B9J08_000936	-0.127552	0.00861682	hypothetical protein
B9J08_000937	-0.0512304	0.300312	hypothetical protein
B9J08_000938	0.15331	0.00559026	hypothetical protein
B9J08_000939	0.318506	4.79e-09	hypothetical protein
B9J08_000940	0.985012	1.31e-30	hypothetical protein
B9J08_000941	0.148658	0.191113	hypothetical protein
B9J08_000942	-0.047554	0.516703	hypothetical protein
B9J08_000943	0.127295	0.0347318	hypothetical protein
B9J08_000944	0.882319	1.58e-46	YjeF family domain-containing protein
B9J08_000945	0.161105	0.0014241	hypothetical protein
B9J08_000946	-0.304932	7.68e-10	hypothetical protein
B9J08_000947	-0.0315402	0.737782	hypothetical protein
B9J08_000948	0.148662	0.00577534	hypothetical protein
B9J08_000949	0.308063	0.00012422	hypothetical protein
B9J08_000950	0.0977312	0.126059	hypothetical protein
B9J08_000951	-1.17558	7.38e-83	hypothetical protein
B9J08_000952	0.148469	0.0503163	hypothetical protein
B9J08_000953	-0.0003116	0.996151	hypothetical protein
B9J08_000954	0.127221	0.0459261	hypothetical protein
B9J08_000955	-0.774922	1.62e-66	ribosomal protein L24
B9J08_000956	-0.114304	0.882591	tRNA-Arg
B9J08_000957	-0.19907	0.000303572	hypothetical protein
B9J08_000958	0.501288	0.000138222	hypothetical protein
B9J08_000959	-0.4156	5.29e-11	hypothetical protein
B9J08_000960	0.352771	0.0358154	hypothetical protein
B9J08_000961	-0.156536	0.10534	hypothetical protein
B9J08_000962	-0.0172528	0.789708	hypothetical protein
B9J08_000963	-0.518615	1.68e-17	hypothetical protein
B9J08_000964	0.0115238	0.803777	1,3-beta-glucan synthase component FKS1
B9J08_000965	-0.51488	4.72e-22	hypothetical protein
B9J08_000966	0.15453	0.00112605	hypothetical protein
B9J08_000967	-0.0424469	0.534402	hypothetical protein
B9J08_000968	0.226083	0.293693	hypothetical protein
B9J08_000969	-0.199069	0.00513709	potassium/sodium efflux P-type ATPase, fungal-type
B9J08_000970	0.118818	0.0915723	hypothetical protein
B9J08_000971	0.0510229	0.331535	hypothetical protein
B9J08_000972	-0.263009	9.9e-05	hypothetical protein
B9J08_000973	-0.190008	0.00434368	hypothetical protein
B9J08_000974	0.0228734	0.767748	hypothetical protein
B9J08_000975	-0.138068	0.00502139	phenylalanine-tRNA ligase, alpha subunit
B9J08_000976	0.0341075	0.476627	dihydrolipoyl dehydrogenase
B9J08_000977	0.223689	0.00523648	hypothetical protein
B9J08_000978	-0.716726	7.57e-26	hypothetical protein
B9J08_000979	-0.139054	0.0377024	hypothetical protein
B9J08_000980	-0.269874	8.1e-07	isocitrate dehydrogenase [NADP] peroxisomal
B9J08_000981	-1.07292	0.0320662	hypothetical protein
B9J08_000982	0.28937	0.000114231	hypothetical protein
B9J08_000983	-0.0760577	0.176122	hypothetical protein
B9J08_000984	0.156713	0.00160262	hypothetical protein
B9J08_000985	-0.209578	0.00431557	hypothetical protein
B9J08_000986	0.736195	2.29e-09	hypothetical protein
B9J08_000987	1.2405	8.45e-118	hypothetical protein
B9J08_000988	0.488834	9.71e-08	hypothetical protein
B9J08_000989	0.727068	3.5e-07	hypothetical protein
B9J08_000990	0.302014	0.560807	hypothetical protein
B9J08_000991	2.84079	0.0488425	tRNA-His
B9J08_000992	-0.321394	1.4e-07	tRNA-intron endonuclease
B9J08_000993	0.329675	3.96e-05	hypothetical protein
B9J08_000994	0.582784	4.4e-25	hypothetical protein
B9J08_000995	-1.24904	2.45e-24	hypothetical protein
B9J08_000996	-0.721008	5.27e-49	ATP-dependent RNA helicase eIF4A
B9J08_000997	0.0268416	0.579078	hypothetical protein
B9J08_000998	-0.766877	2.29e-63	40S ribosomal protein S21
B9J08_000999	-0.113857	0.125139	hypothetical protein
B9J08_001000	0.487065	0.000425389	hypothetical protein
B9J08_001001	0.581528	1.3e-16	hypothetical protein
B9J08_001002	0.288233	1.31e-10	hypothetical protein
B9J08_001003	0.447906	5.29e-07	hypothetical protein
B9J08_001004	0.0686019	0.305667	hypothetical protein
B9J08_001005	0.203679	3.87e-05	V-type proton ATPase subunit E
B9J08_001006	-0.278179	0.000573008	hypothetical protein
B9J08_001007	-0.249406	0.000170815	hypothetical protein
B9J08_001008	0.224115	0.000633867	hypothetical protein
B9J08_001009	0.222433	0.0120674	hypothetical protein
B9J08_001010	-0.389695	1.98e-08	hypothetical protein
B9J08_001011	0.472362	8.03e-11	hypothetical protein
B9J08_001012	1.3847	1.19e-17	hypothetical protein
B9J08_001013	-0.30866	1.44e-06	hypothetical protein
B9J08_001014	-0.904711	9.12e-60	hypothetical protein
B9J08_001015	0.10082	0.566841	hypothetical protein
B9J08_001016	0.254903	0.498044	hypothetical protein
B9J08_001017	-0.0966725	0.753664	hypothetical protein
B9J08_001018	-0.964972	1.02e-65	hypothetical protein
B9J08_001019	0.855551	3.11e-09	hypothetical protein
B9J08_001020	0.24979	0.00347517	hypothetical protein
B9J08_001021	0.176422	0.0703102	hypothetical protein
B9J08_001022	-0.0820256	0.491158	hypothetical protein
B9J08_001023	0.0120669	0.921148	hypothetical protein
B9J08_001024	-0.256069	3.64e-05	hypothetical protein
B9J08_001025	0.217068	3.36e-05	hypothetical protein
B9J08_001026	-0.052891	0.408297	hypothetical protein
B9J08_001027	0.134101	0.0668873	hypothetical protein
B9J08_001028	0.052425	0.431606	hypothetical protein
B9J08_001029	-0.505935	7.55e-09	hypothetical protein
B9J08_001030	0.285523	5.83e-05	hypothetical protein
B9J08_001031	0.346509	1.31e-10	FK506-binding protein 1
B9J08_001032	0.0554185	0.335093	hypothetical protein
B9J08_001033	-0.90109	7.38e-69	hypothetical protein
B9J08_001034	-0.493984	0.126276	hypothetical protein
B9J08_001035	-0.0682686	0.341353	hypothetical protein
B9J08_001036	-0.480324	6.71e-20	hypothetical protein
B9J08_001037	-0.87279	1.97e-58	hypothetical protein
B9J08_001038	0.0922783	0.173204	hypothetical protein
B9J08_001039	0.3846	4.97e-16	TIGR01456 family HAD hydrolase
B9J08_001040	0.0274719	0.766994	hypothetical protein
B9J08_001041	-0.23149	0.000329869	hypothetical protein
B9J08_001042	0.217554	0.000295264	hypothetical protein
B9J08_001043	0.0101091	0.897286	hypothetical protein
B9J08_001044	-1.15315	2.07e-81	hypothetical protein
B9J08_001045	-0.391441	2.64e-17	DNA-directed RNA polymerase II subunit RPB2
B9J08_001046	-1.09618	1.01e-75	ribosomal protein L13
B9J08_001047	-0.0779296	0.213353	DNA-directed RNA polymerase II subunit rpb7
B9J08_001048	0.00120782	0.982822	hypothetical protein
B9J08_001049	-0.126975	0.014447	arginine-tRNA ligase, cytoplasmic
B9J08_001050	0.438057	0.141805	hypothetical protein
B9J08_001051	0.229178	0.000108623	hypothetical protein
B9J08_001052	0.471838	1.81e-11	hypothetical protein
B9J08_001053	0.695099	1.99e-20	hypothetical protein
B9J08_001054	NA	NA	hypothetical protein
B9J08_001055	NA	NA	5S ribosomal RNA
B9J08_001056	NA	NA	5S ribosomal RNA
B9J08_001057	NA	NA	5S ribosomal RNA
B9J08_001058	NA	NA	5S ribosomal RNA
B9J08_001059	NA	NA	5S ribosomal RNA
B9J08_001060	NA	NA	5S ribosomal RNA
B9J08_001061	-0.517114	0.300903	5S ribosomal RNA
B9J08_001062	-1.20696	5.29e-66	hypothetical protein
B9J08_001063	0.384994	1e-08	hypothetical protein
B9J08_001064	-0.0936435	0.0960098	hypothetical protein
B9J08_001065	0.204144	0.0210149	hypothetical protein
B9J08_001066	-0.0592405	0.279367	hypothetical protein
B9J08_001067	-0.628079	7.3e-37	hypothetical protein
B9J08_001068	-1.00423	1.41e-53	hypothetical protein
B9J08_001069	0.342683	5.96e-07	hypothetical protein
B9J08_001070	1.01122	5.08e-54	hypothetical protein
B9J08_001071	-0.341366	2.39e-10	hypothetical protein
B9J08_001072	0.225619	0.000745471	hypothetical protein
B9J08_001073	0.989891	4.63e-52	glycine cleavage system T protein
B9J08_001074	-0.422849	0.597122	hypothetical protein
B9J08_001075	-0.328946	4.09e-08	hypothetical protein
B9J08_001076	0.253491	0.032978	hypothetical protein
B9J08_001077	-0.317447	1.66e-08	hypothetical protein
B9J08_001078	0.128732	0.146393	hypothetical protein
B9J08_001079	-0.183842	0.000878559	hypothetical protein
B9J08_001080	0.574992	3.13e-07	hypothetical protein
B9J08_001081	-0.710938	1.27e-52	60S ribosomal protein L23-B
B9J08_001082	0.0404596	0.478446	hypothetical protein
B9J08_001083	0.179397	0.0166047	hypothetical protein
B9J08_001084	0.0576035	0.308561	hypothetical protein
B9J08_001085	-0.519542	1.73e-25	26S protease regulatory subunit 4
B9J08_001086	0.496741	2.4e-12	thioredoxin
B9J08_001087	-0.45457	4.24e-11	hypothetical protein
B9J08_001088	-0.576562	2.14e-13	hypothetical protein
B9J08_001089	0.368353	1.09e-05	hypothetical protein
B9J08_001090	-0.625312	8.11e-36	thioredoxin reductase
B9J08_001091	-0.0249043	0.800931	hypothetical protein
B9J08_001092	-0.364556	1.24e-06	hypothetical protein
B9J08_001093	0.0711613	0.239285	hypothetical protein
B9J08_001094	0.00749347	0.916495	hypothetical protein
B9J08_001095	-0.714397	1.67e-22	tryptophan-tRNA ligase
B9J08_001096	0.0146648	0.800693	hypothetical protein
B9J08_001097	-0.897965	0.682357	tRNA-Lys
B9J08_001098	0.165533	0.00246848	purine nucleoside phosphorylase I, inosine and guanosine-specific
B9J08_001099	0.181081	0.000274591	protein transporter SEC13
B9J08_001100	-0.167097	0.0517226	hypothetical protein
B9J08_001101	0.247171	4.22e-05	hypothetical protein
B9J08_001102	0.0666011	0.207006	hypothetical protein
B9J08_001103	0.0149801	0.82979	hypothetical protein
B9J08_001104	0.197055	0.00631846	hypothetical protein
B9J08_001105	-0.386282	1.79e-11	hypothetical protein
B9J08_001106	0.51979	2.28e-16	hypothetical protein
B9J08_001107	0.76328	1.13e-27	hypothetical protein
B9J08_001108	0.269672	7.25e-06	DNA repair protein rhp51
B9J08_001109	-0.225931	8.35e-05	hypothetical protein
B9J08_001110	0.169823	0.0665747	hypothetical protein
B9J08_001111	-0.038366	0.429499	hypothetical protein
B9J08_001112	-0.323006	0.000322961	hypothetical protein
B9J08_001113	-0.245888	0.00370206	hypothetical protein
B9J08_001114	-0.17533	0.0660666	hypothetical protein
B9J08_001115	0.12548	0.734256	hypothetical protein
B9J08_001116	0.0696677	0.550534	hypothetical protein
B9J08_001117	0.199783	0.164507	hypothetical protein
B9J08_001118	-0.41099	4.97e-08	hypothetical protein
B9J08_001119	-0.164934	0.0250165	hypothetical protein
B9J08_001120	-0.616889	1.09e-21	hypothetical protein
B9J08_001121	-0.251721	0.000168101	hypothetical protein
B9J08_001122	-0.617028	3.84e-35	alanine-tRNA ligase
B9J08_001123	0.0668863	0.38199	hypothetical protein
B9J08_001124	-0.0509204	0.281075	hypothetical protein
B9J08_001125	-0.173683	0.0018068	hypothetical protein
B9J08_001126	-0.0647742	0.331667	hypothetical protein
B9J08_001127	0.163354	0.248778	hypothetical protein
B9J08_001128	-0.943237	7.84e-58	hypothetical protein
B9J08_001129	-0.164171	0.00850017	hypothetical protein
B9J08_001130	-0.308171	1.73e-07	hypothetical protein
B9J08_001131	-0.159661	0.00117493	hypothetical protein
B9J08_001132	-0.0820521	0.18123	hypothetical protein
B9J08_001133	0.179985	0.0836029	hypothetical protein
B9J08_001134	-0.161409	0.0788849	hypothetical protein
B9J08_001135	-0.115496	0.0680982	deoxyhypusine hydroxylase
B9J08_001136	-0.676743	9.76e-41	T-complex protein 1 subunit epsilon
B9J08_001137	0.387047	3.5e-15	hypothetical protein
B9J08_001138	-0.083731	0.109171	hypothetical protein
B9J08_001139	-0.155582	0.138446	18S rRNA biogenesis protein RCL1
B9J08_001140	0.0142512	0.819328	hypothetical protein
B9J08_001141	-0.0317431	0.591483	hypothetical protein
B9J08_001142	0.187687	0.000965506	hypothetical protein
B9J08_001143	-0.249696	1.01e-05	ferrochelatase
B9J08_001144	-0.144357	0.0787099	hypothetical protein
B9J08_001145	0.439728	5.03e-05	hypothetical protein
B9J08_001146	0.0471552	0.515803	hypothetical protein
B9J08_001147	-0.456119	1.43e-16	hypothetical protein
B9J08_001148	-0.392591	1.66e-14	hypothetical protein
B9J08_001149	0.153632	0.00277536	hypothetical protein
B9J08_001150	0.298148	7.14e-08	V-type ATPase, G subunit
B9J08_001151	-0.274522	9.75e-07	hypothetical protein
B9J08_001152	0.177375	0.00127507	hypothetical protein
B9J08_001153	1.42112	3.24e-17	hypothetical protein
B9J08_001154	0.0113189	0.989642	tRNA-Leu
B9J08_001155	0.116059	0.130639	hypothetical protein
B9J08_001156	-0.157693	0.00175648	glutamate-tRNA ligase
B9J08_001157	0.281689	3.36e-05	hypothetical protein
B9J08_001158	0.128489	0.0649109	hypothetical protein
B9J08_001159	0.0420558	0.473789	hypothetical protein
B9J08_001160	-0.232308	0.000353205	hypothetical protein
B9J08_001161	-0.0410815	0.422799	hypothetical protein
B9J08_001162	-0.220815	0.0002566	hypothetical protein
B9J08_001163	-0.291479	0.000253817	hypothetical protein
B9J08_001164	0.00126884	0.98327	hypothetical protein
B9J08_001165	-0.354942	9.11e-12	hypothetical protein
B9J08_001166	0.0614638	0.47839	hypothetical protein
B9J08_001167	0.306887	1.03e-05	hypothetical protein
B9J08_001168	-0.233502	6.2e-06	hypothetical protein
B9J08_001169	-0.0295653	0.643742	hypothetical protein
B9J08_001170	-0.180617	0.000553171	protein URE2
B9J08_001171	0.386618	6.1e-12	hypothetical protein
B9J08_001172	-0.219291	2.37e-05	hypothetical protein
B9J08_001173	0.39265	3.43e-05	hypothetical protein
B9J08_001174	-0.0635781	0.293832	hypothetical protein
B9J08_001175	-0.0731254	0.211618	hypothetical protein
B9J08_001176	-0.0691583	0.139626	phenylalanine-tRNA ligase beta subunit
B9J08_001177	0.287216	2.64e-08	hypothetical protein
B9J08_001178	-0.463442	3.69e-20	hypothetical protein
B9J08_001179	-0.0617486	0.252827	hypothetical protein
B9J08_001180	-0.0610151	0.868597	hypothetical protein
B9J08_001181	-0.469063	2.29e-15	hypothetical protein
B9J08_001182	0.782345	1.33e-51	hypothetical protein
B9J08_001183	0.0241733	0.653291	hypothetical protein
B9J08_001184	-0.604463	2.07e-06	hypothetical protein
B9J08_001185	0.0600942	0.305159	hypothetical protein
B9J08_001186	-0.108356	0.0261953	hypothetical protein
B9J08_001187	0.0532615	0.524832	hypothetical protein
B9J08_001188	-0.045613	0.410929	hypothetical protein
B9J08_001189	-0.249622	0.0112477	hypothetical protein
B9J08_001190	-0.0571319	0.601015	hypothetical protein
B9J08_001191	0.537509	4.5e-05	hypothetical protein
B9J08_001192	-0.050367	0.319686	hypothetical protein
B9J08_001193	-0.381429	8.1e-11	hypothetical protein
B9J08_001194	-0.224208	0.8172	hypothetical protein
B9J08_001195	0.157098	0.000900936	hypothetical protein
B9J08_001196	0.290737	0.107235	hypothetical protein
B9J08_001197	0.192525	0.00168984	hypothetical protein
B9J08_001198	0.530019	4.63e-10	hypothetical protein
B9J08_001199	0.132388	0.240321	hypothetical protein
B9J08_001200	0.333428	4.39e-08	hypothetical protein
B9J08_001201	0.194074	0.19147	hypothetical protein
B9J08_001202	-0.472531	1.39e-19	hypothetical protein
B9J08_001203	0.133465	0.0134961	hypothetical protein
B9J08_001204	0.911268	3.26e-33	hypothetical protein
B9J08_001205	0.667643	6.04e-22	hydroxyethylthiazole kinase
B9J08_001206	0.301981	0.000237889	hypothetical protein
B9J08_001207	-0.476762	8.39e-21	fumarate hydratase, mitochondrial
B9J08_001208	-0.246694	0.00454944	hypothetical protein
B9J08_001209	0.00746922	0.893133	hypothetical protein
B9J08_001210	0.103695	0.106705	hypothetical protein
B9J08_001211	-0.00498825	0.928409	hypothetical protein
B9J08_001212	-1.99422	0.044429	tRNA-Met
B9J08_001213	0.344086	0.000119378	hypothetical protein
B9J08_001214	0.244918	0.000294465	hypothetical protein
B9J08_001215	0.166734	0.0248369	hypothetical protein
B9J08_001216	0.077261	0.110207	hypothetical protein
B9J08_001217	0.190981	0.00345775	hypothetical protein
B9J08_001218	-0.203615	0.0104774	hypothetical protein
B9J08_001219	-0.229791	0.0192517	hypothetical protein
B9J08_001220	-0.0549677	0.524759	hypothetical protein
B9J08_001221	-0.403848	1.66e-07	hypothetical protein
B9J08_001222	-0.157141	0.00476613	hypothetical protein
B9J08_001223	0.342453	0.0120566	hypothetical protein
B9J08_001224	-0.672681	3.13e-27	hypothetical protein
B9J08_001225	0.232299	0.000524418	hypothetical protein
B9J08_001226	0.482303	8.27e-11	hypothetical protein
B9J08_001227	0.476009	7.58e-22	glyceraldehyde-3-phosphate dehydrogenase
B9J08_001228	0.605543	1.73e-35	hypothetical protein
B9J08_001229	-0.614374	9.73e-16	hypothetical protein
[truncated: 4,357 more rows]

## Sheet: Diff exp C. alb
15 min treatment							60 min treatment
[truncated: 357 more rows]

[truncated: 1 more sheets: Diff exp C. aur]
